# Supplementary material for: Supporting Restoration Decisions through Integration of Tree-Ring and Modeling Data: Reconstructing Flow and Salinity in the San Francisco Estuary over the Past Millennium
Source: Preprints.org preprint supplement (doi:10.20944/preprints202106.0122.v1), 2021-06-04
Supplement: Supplementary file 1 [file supplementary]

## Appendix C. Table of Statistics of Single Site Reconstructions.

The table below lists statistics of single-site reconstruction (SSR) models. Statistics apply to the regression models as calibrated by regression of square-root-transformed annual flow on lagged residual tree-ring chronologies and their square, as described in the paper.

**Table C1.** Statistics of single-site reconstruction (SSR) models.

| N <sup>a</sup> | Code <sup>b</sup> | Calibration <sup>c</sup> |           |             | Validation <sup>d</sup> |      | Reconstruction <sup>e</sup> |    |
|----------------|-------------------|--------------------------|-----------|-------------|-------------------------|------|-----------------------------|----|
|                |                   | Predictors               | Years     | $R^2_{adj}$ | RE                      | r    | Years                       | M  |
| 1              | B27               | 1110100000               | 1906-2014 | 0.64        | 0.63                    | 0.79 | 1382-2014                   | S  |
| 2              | B32               | 1000000000               | 1906-2014 | 0.44        | 0.44                    | 0.65 | 1413-2014                   | S  |
| 3              | BMC               | 1000000000               | 1906-2010 | 0.17        | 0.16                    | 0.37 | 901-2010                    | LS |
| 4              | KR2               | 1000000000               | 1906-2001 | 0.33        | 0.31                    | 0.54 | 1589-2001                   | S  |
| 5              | DEN               | 1000000100               | 1906-2001 | 0.26        | 0.23                    | 0.46 | 1604-2001                   | S  |
| 6              | DMS               | 1001000000               | 1906-2001 | 0.26        | 0.26                    | 0.49 | 1472-2001                   | S  |
| 7              | KAW               | 1000000000               | 1906-2002 | 0.30        | 0.30                    | 0.52 | 1497-2002                   | S  |
| 8              | SJR               | 1100000000               | 1906-2002 | 0.36        | 0.34                    | 0.57 | 1560-2002                   | S  |
| 9              | CTN               | 1000000000               | 1906-2013 | 0.35        | 0.34                    | 0.57 | 945-2013                    | S  |
| 10             | CTS               | 1010000000               | 1906-2013 | 0.44        | 0.43                    | 0.65 | 1155-2013                   | S  |
| 11             | EVG               | 1000000000               | 1906-2009 | 0.41        | 0.42                    | 0.63 | 901-2009                    | LS |
| 12             | GFE               | 1010000000               | 1906-2013 | 0.44        | 0.43                    | 0.64 | 901-2013                    | LS |
| 13             | GFN               | 0110000000               | 1906-2013 | 0.32        | 0.32                    | 0.55 | 1085-2013                   | S  |
| 14             | GFS               | 1000000000               | 1906-2013 | 0.36        | 0.35                    | 0.58 | 936-2013                    | S  |
| 15             | KAI               | 1000000000               | 1906-2009 | 0.22        | 0.21                    | 0.44 | 901-2009                    | LS |
| 16             | LCM               | 1000100000               | 1906-2014 | 0.31        | 0.31                    | 0.54 | 1424-2014                   | S  |
| 17             | LOB               | 1010000000               | 1906-2014 | 0.25        | 0.25                    | 0.48 | 1336-2014                   | S  |
| 18             | LPK               | 0100000000               | 1906-2013 | 0.11        | 0.11                    | 0.30 | 901-2013                    | LS |
| 19             | LSC               | 1000000000               | 1906-2014 | 0.09        | 0.08                    | 0.24 | 1381-2014                   | S  |
| 20             | MHC               | 1000000000               | 1906-2010 | 0.31        | 0.31                    | 0.54 | 1301-2010                   | S  |
| 21             | PMN               | 0100000000               | 1906-2013 | 0.26        | 0.24                    | 0.47 | 1338-2013                   | S  |
| 22             | RRT               | 1010000000               | 1906-2013 | 0.10        | 0.06                    | 0.23 | 1416-2013                   | S  |
| 23             | SBP               | 1010000000               | 1906-2013 | 0.34        | 0.33                    | 0.56 | 901-2013                    | LS |
| 24             | CPE               | 1100000101               | 1906-2009 | 0.20        | 0.18                    | 0.40 | 901-2009                    | LS |
| 25             | UCJ               | 1100010000               | 1906-2009 | 0.16        | 0.14                    | 0.35 | 901-2009                    | LS |
| 26             | EPW               | 1100100000               | 1906-2009 | 0.13        | 0.09                    | 0.28 | 901-2009                    | LS |
| 27             | LVF               | 1000100000               | 1906-2009 | 0.28        | 0.27                    | 0.50 | 1510-2009                   | S  |
| 28             | STA               | 1000000000               | 1906-2009 | 0.02        | 0.01                    | 0.03 | 1638-2009                   |    |
| 29             | UCP               | 0000001000               | 1906-2009 | 0.05        | 0.04                    | 0.14 | 1561-2009                   |    |
| 30             | ALU               | 1000100000               | 1906-2008 | 0.48        | 0.48                    | 0.68 | 1455-2008                   | S  |
| 31             | BLU               | 1000110000               | 1906-2008 | 0.21        | 0.19                    | 0.42 | 1157-2008                   | S  |
| 32             | DRU               | 1000100000               | 1906-2008 | 0.31        | 0.31                    | 0.54 | 1362-2008                   | S  |
| 33             | FBK               | 1000100000               | 1906-2008 | 0.41        | 0.39                    | 0.61 | 901-2008                    | LS |
| 34             | HRK               | 1000000000               | 1906-2008 | 0.24        | 0.24                    | 0.47 | 903-2008                    | LS |
| 35             | LVU               | 1000100000               | 1906-2008 | 0.38        | 0.37                    | 0.60 | 1426-2008                   | S  |
| 36             | LJK               | 1000010000               | 1906-2008 | 0.31        | 0.30                    | 0.53 | 1341-2008                   | S  |
| 37             | LUP               | 0000000100               | 1906-2009 | 0.03        | 0.03                    | 0.10 | 1471-2009                   |    |

|    |     |            |           |       |       |       |           |    |
|----|-----|------------|-----------|-------|-------|-------|-----------|----|
| 38 | LCU | 1000100000 | 1906-2008 | 0.33  | 0.33  | 0.56  | 1420-2008 | S  |
| 39 | PPB | 1000000000 | 1906-2008 | -0.01 | -0.01 | -0.25 | 1586-2008 |    |
| 40 | AGK | 1000000000 | 1906-2008 | 0.41  | 0.40  | 0.62  | 901-2008  | LS |
| 41 | AMC | 1000000000 | 1906-2002 | 0.29  | 0.29  | 0.52  | 1480-2002 | S  |
| 42 | CLK | 1000010000 | 1906-2002 | 0.44  | 0.44  | 0.65  | 1624-2002 | S  |
| 43 | DIB | 1000100010 | 1906-2002 | 0.38  | 0.38  | 0.60  | 1523-2002 | S  |
| 44 | DPR | 1000000000 | 1906-2003 | 0.31  | 0.31  | 0.53  | 1535-2003 | S  |
| 45 | DCP | 1000000000 | 1906-2003 | 0.11  | 0.10  | 0.27  | 1606-2003 | S  |
| 46 | FIG | 1010000000 | 1906-2001 | 0.30  | 0.31  | 0.53  | 1296-2001 | S  |
| 47 | FLK | 1000000000 | 1906-2001 | 0.23  | 0.22  | 0.44  | 1640-2001 | S  |
| 48 | HAS | 1000000000 | 1906-2002 | 0.29  | 0.29  | 0.51  | 1463-2002 | S  |
| 49 | MDI | 1110010100 | 1906-2010 | 0.72  | 0.70  | 0.83  | 1585-2010 | S  |
| 50 | MUR | 1100000000 | 1906-2002 | 0.18  | 0.18  | 0.39  | 1535-2002 | S  |
| 51 | PCH | 1100100100 | 1906-2001 | 0.52  | 0.49  | 0.69  | 1514-2001 | S  |
| 52 | PPC | 1000000000 | 1906-2002 | 0.23  | 0.23  | 0.46  | 1541-2002 | S  |
| 53 | PNM | 1000000000 | 1906-2001 | 0.27  | 0.27  | 0.50  | 1582-2001 | S  |
| 54 | PUT | 1000010010 | 1906-2002 | 0.43  | 0.42  | 0.63  | 1537-2002 | S  |
| 55 | IND | 1000001101 | 1906-2001 | 0.26  | 0.22  | 0.45  | 1498-2001 | S  |
| 56 | TUO | 1100000000 | 1906-2003 | 0.17  | 0.17  | 0.38  | 1411-2003 | S  |
| 57 | SND | 0000000100 | 1906-2010 | 0.04  | 0.04  | 0.13  | 901-2010  |    |
| 58 | CSP | 1000001000 | 1906-2010 | 0.13  | 0.10  | 0.28  | 901-2010  | LS |
| 59 | SMU | 1000000000 | 1906-2003 | -0.00 | -0.01 | -0.22 | 901-2003  |    |
| 60 | PTL | 0000100000 | 1906-2004 | 0.02  | 0.01  | 0.01  | 1403-2004 |    |
| 61 | CTL | 1000000000 | 1906-2004 | 0.05  | 0.05  | 0.17  | 1404-2004 |    |
| 62 | CRS | 1000000000 | 1906-2007 | 0.07  | 0.08  | 0.23  | 1615-2007 | S  |
| 63 | CSR | 1000000000 | 1906-2010 | 0.12  | 0.11  | 0.29  | 1515-2010 | S  |
| 64 | LLR | 1000000000 | 1906-2010 | 0.16  | 0.14  | 0.35  | 1570-2010 | S  |
| 65 | LTS | 1000000000 | 1906-2010 | 0.14  | 0.12  | 0.31  | 1454-2010 | S  |
| 66 | MSC | 1000000000 | 1906-2010 | 0.21  | 0.20  | 0.42  | 1512-2010 | S  |
| 67 | PMC | 1000000000 | 1906-2010 | 0.07  | 0.06  | 0.20  | 1495-2010 | S  |
| 68 | PIN | 1000000000 | 1906-2010 | 0.22  | 0.21  | 0.43  | 1573-2010 | S  |
| 69 | PSD | 1000000000 | 1906-2010 | 0.00  | -0.00 | -0.06 | 1479-2010 |    |

<sup>a</sup>Site number; sites ordered as in rows of spreadsheet in Appendix A.

<sup>b</sup>Site code, cross-referenced to site code in Appendix A.

<sup>c</sup>Calibration statistics. "Predictors" are ten logical pointers indicating whether in (1) or not in (0) model. From left right, odd digits (1,3,...,9) refer to tree-ring index at lags 0, -1, -2, +1 and +2 years relative to year of flow. Even digits (2, 4,...,10) refer to squared tree-ring index at those same lags. For example, for site #1 (B27) the predictors of flow,  $y_t$ , in year  $t$  are  $x_t$ ,  $x_t^2$ ,  $x_{t-1}$ , and  $x_{t-2}$ , where  $x_t$  is the tree-ring index in year  $t$ . "Years" are the starting and ending years of the model calibration period, referring to the years of flow (lagged predictors would mean some earlier and later tree-ring data could be included in calibration). " $R_{adj}^2$ " is the regression  $R^2$  adjusted for number of predictors in the model.

<sup>d</sup>Validation statistics. “RE” is the reduction of error, a measure of skill of prediction when the model is applied to data not used in calibration (see Methods). RE here is computed from the leave-9-out cross-validation residuals. “r” is the Pearson correlation between the observed flows and the cross-validation predictions. Statistical significance of r was evaluated by a Monte Carlo method described in Appendix B. For all SSRs actually used in the long or short reconstructions (last column) the probability that the population correlation is less than or equal to 0 (one-sided test) is rejected ( $p < 0.01$ ) according to the Monte Carlo results.

<sup>e</sup>Reconstruction statistics. “Years” are the first and last year of time coverage by the SSR. “L” and “S” indicate whether the SSR was used in the multi-site “long” and “short” versions of reconstruction. Presence in “L” will depend primarily on time coverage by the SSR. Some tree-ring sites are not used in “L” or “S.” Such sites were flagged as unusable by at least one of five criteria described in the Appendix B.
