# Supplementary material for: Supporting Restoration Decisions through Integration of Tree-Ring and Modeling Data: Reconstructing Flow and Salinity in the San Francisco Estuary over the Past Millennium
Source: Preprints.org preprint supplement (doi:10.20944/preprints202106.0122.v1), 2021-06-04
Supplement: Supplementary file 2 [file supplementary]

Archive with 6 entries (6 files):
- Supplementary material/AppendixA.xlsx
- Supplementary material/AppendixB.pdf
- Supplementary material/AppendixC.pdf
- Supplementary material/AppendixE.txt
- Supplementary material/AppendixF.zip
- Supplementary material/AppendixG.txt
