# Supplementary material for: Supporting Restoration Decisions through Integration of Tree-Ring and Modeling Data: Reconstructing Flow and Salinity in the San Francisco Estuary over the Past Millennium
Source: Preprints.org preprint supplement (doi:10.20944/preprints202106.0122.v1), 2021-06-04
Supplement: Supplementary file 2 [file supplementary › Supplementary material/AppendixA.xlsx]

## Sheet: ChronMetadata
Code	Map1	Map2	SiteName	FilePrefix	Firstyr	Lastyr	rbar	EPSyr	Species	Lat	Lon	Elevm	PI	DataFrom	Long	Short	State	Country
B27	1	1	Rock Springs Ranch Update	B27ci	1379	2016	0.69	1397	QUDG	36.4897	-120.878	1067	c	ay2	0	1	CA	USA
B32	2	2	Wright Mountain Update	B32c	1409	2016	0.63	1551	QUDG	36.34	-120.52	1219	c	ay2	0	1	CA	USA
BMC	3	3	Black Mountain	BMC#e	-210	2012	0.27	1524	SEGI	36.1044	-118.655	1950	a	ay2	1	1	CA	USA
KR2	4	4	Kern River	ca621c	1585	2003	0.69	1683	QUDG	35.5323	-118.628	715	c	ay2	0	1	CA	USA
DEN	5	5	Dennison Peak	ca651c	1601	2003	0.43	1666	QUDG	36.2857	-118.776	1132	c	ay2	0	1	CA	USA
DMS	6	6	Dead Mule Saddle	ca653c	1468	2003	0.5	1675	QUDG	35.908	-118.667	1237	c	ay2	0	1	CA	USA
KAW	7	7	North Fork Kaweah River	ca659c	1494	2004	0.52	1540	QUDG	36.5493	-118.893	701	c	ay2	0	1	CA	USA
SJR	8	8	San Joaquin Experimental Range	ca664c	1557	2004	0.57	1650	QUDG	37.0902	-119.747	345	c	ay2	0	1	CA	USA
CTN	9	9	Crabtree North (Sierras)	CTNM#ei	941	2015	0.41	1350	PIBA	36.5582	-118.363	3285	d	ay2	0	1	CA	USA
CTS	10	10	Crabtree South (Sierras)	CTSM#e	1150	2015	0.5	1279	PIBA	36.5433	-118.368	3254	d	ay2	0	1	CA	USA
EVG	11	11	Evans Grove Merged	EVGM	-350	2011	0.34	1506	SEGI	36.776	-118.818	2183	a	ay2	1	1	CA	USA
GFE	12	12	Guyot Flat East (Sierras)	GFEM#ei	890	2015	0.49	1064	PIBA	36.5194	-118.348	3327	d	ay2	1	1	CA	USA
GFN	13	13	Guyot Flat North (Sierras)	GFN#e	1080	2015	0.48	1200	PIBA	36.5281	-118.358	3276	d	ay2	0	1	CA	USA
GFS	14	14	Guyot Flat South (Sierras)	GFSM#ei	931	2015	0.39	984	PIBA	36.5036	-118.346	3158	d	ay2	0	1	CA	USA
KAI	15	15	Kaiser Pass Merged	KAIM	720	2011	0.33	1346	JUOC	37.306	-119.11	2685	d	ay2	1	1	CA	USA
LCM	16	16	Log Cabin Mine Update	LCMM#ei	1420	2016	0.55	1525	PSMA, PIJE	37.95	-119.15	2499	b	ay2	0	1	CA	USA
LOB	17	17	Los Lobos Creek Update	LOBc	1333	2016	0.67	1396	QUDG	34.9233	-119.24	1017	c	ay2	0	1	CA	USA
LPK	18	18	Lake Peak Update (Tosh)	LPKM#ei	340	2015	0.42	1181	PIFL	34.1161	-116.812	3017	b	ay2	1	1	CA	USA
LSC	19	19	Little Sycamore Canyon	LSCci	1378	2016	0.6	1478	QUDG	34.51	-118.43	1128	c	ay2	0	1	CA	USA
MHC	20	20	Mountain Home	MHC#e	1297	2012	0.26	1671	SEGI	36.24	-118.672	1970	a	ay2	0	1	CA	USA
PMN	21	21	Pine Mountain Update	PMNM#ei	1333	2015	0.66	1512	PSMA	34.6732	-119.372	1176	b	ay2	0	1	CA	USA
RRT	22	22	Red Reef Trail	RRT#i	1411	2015	0.58	1634	PSMA	34.5024	-119.116	1412	b	ay2	0	1	CA	USA
SBP	23	23	Siberian Pass Trail (Sierras)	SBPM#ei	783	2015	0.41	1357	PIBA	36.4666	-118.272	3332	d	ay2	1	1	CA	USA
CPE	24	24	Carson Pass East Merged	CPEM	-420	2011	0.26	1418	JUOC	38.702	-119.986	2537	a	at3	1	1	CA	USA
UCJ	25	25	Upper Cascade Creek Juniper	UCJ#e	647	2011	0.35	1387	JUOC	38.581	-119.805	2367	a	at3	1	1	CA	USA
EPW	26	26	Ebbetts Pass West Juniper Edited	EPW#e	711	2011	0.31	1595	JUOC	38.543	-119.823	2600	a	at3	1	1	CA	USA
LVF	27	27	Leavitt Falls	LVF	1505	2011	0.47	1640	PIJE	38.344	-119.547	2200	a	at3	0	1	CA	USA
STA	28	28	Stanislaus River	STAE	1633	2011	0.44	1713	PIJE	38.411	-120.051	2029	a	at3	0	0	CA	USA
UCP	29	29	Upper Cascade Creek Pine	UCP	1556	2011	0.44	1677	PIJE	38.581	-119.804	2361	a	at3	0	0	CA	USA
ALU	30	30	Antelope Lake (update)	ALU#e	1450	2010	0.43	1578	PIJE	40.1141	-120.638	1455	a	at3	0	1	CA	USA
BLU	31	31	Boles Creek (update)	BCU#e	1152	2010	0.44	1454	JUOC	41.8438	-120.885	1508	a	at3	0	1	CA	USA
DRU	32	32	Dalton Reservoir (update)	DRU#e	1357	2010	0.54	1567	JUOC	41.6667	-120.983	1531	a	at3	0	1	CA	USA
FBK	33	33	Frederick Butte (update)	FBK#e	870	2010	0.63	912	JUOC	43.588	-120.438	1600	a	at3	1	1	OR	USA
HRK	34	34	Horse Ridge (update)	HRK#e	898	2010	0.63	923	JUOC	43.978	-121.07	1150	a	at3	1	1	OR	USA
LVU	35	35	Lakeview (update)	LVU#e	1421	2010	0.5	1719	PIPO	42.1198	-120.564	1503	a	at3	0	1	OR	USA
LJK	36	36	Little Juniper Mountain (update)	LJK#e	1337	2010	0.59	1504	JUOC	43.13	-119.87	1596	a	at3	0	1	OR	USA
LUP	37	37	Luther Pass	LUPc	1466	2011	0.29	NaN	PIJE	38.7902	-119.946	2423	a	at3	0	0	CA	USA
LCU	38	38	Lemon Canyon (update)	LCU#e	1415	2010	0.47	1596	PIJE	39.5771	-120.297	1700	a	at3	0	1	CA	USA
PPB	39	39	Porcupine Butte	PPB#e	1581	2010	0.38	1724	PIPO	41.4304	-121.613	1409	a	at3	0	0	CA	USA
AGK	40	40	Table Rock-Arrow Gap (update)	AGK#e	530	2010	0.62	899	JUOC	43.18	-120.9	1418	a	at3	1	1	OR	USA
AMC	41	41	American Canyon	ca614c	1475	2004	0.54	1598	QUDG	35.2769	-120.269	561	c	at3	0	1	CA	USA
CLK	42	42	Clear Lake State Park:	ca615c	1620	2004	0.4	1675	QUDG	39.0113	-122.813	427	c	at3	0	1	CA	USA
DIB	43	43	Dibble Creek	ca652c	1519	2004	0.43	1757	QUDG	40.2539	-122.377	218	c	at3	0	1	CA	USA
DPR	44	44	Don Pedro Reservoir and Green Valley	ca616c	1531	2004	0.45	1681	QUDG	37.7064	-120.433	274	c	at3	0	1	CA	USA
DCP	45	45	Dye Creek Preserve:	ca654c	1601	2005	0.35	1747	QUDG	40.0928	-122.029	143	c	at3	0	1	CA	USA
FIG	46	46	Figueroa Mountain	ca656c	1293	2003	0.62	1538	QUDG	34.7352	-119.997	1036	c	at3	0	1	CA	USA
FLK	47	47	Folsom Lake State Recreation Area American River	ca620c	1536	2003	0.38	1733	QUDG	38.7565	-121.113	167	c	at3	0	1	CA	USA
HAS	48	48	Hastings Reservation	ca657c	1460	2004	0.45	1703	QUDG	36.3948	-121.547	755	c	at3	0	1	CA	USA
MDI	49	49	Mt. Diablo State Park	ca623c	1583	2012	0.62	1678	QUDG	37.8792	-121.966	182	c	at3	0	1	CA	USA
MUR	50	50	Murphy Ranch	ca661c	1532	2004	0.42	1780	QUDG	39.8352	-122.608	342	c	at3	0	1	CA	USA
PCH	51	51	Pacheco Pass State Park	ca625c	1510	2003	0.59	1607	QUDG	37.0368	-121.209	434	c	at3	0	1	CA	USA
PPC	52	52	Palo Prieto Canyon	ca662c	1538	2004	0.68	1667	QUDG	35.6855	-120.256	558	c	at3	0	1	CA	USA
PNM	53	53	Pinnacles National Monument:	ca626c	1577	2003	0.53	1665	QUDG	36.4795	-121.179	487	c	at3	0	1	CA	USA
PUT	54	54	Putah Creek, Lake Berryessa	ca663c	1534	2004	0.55	1589	QUDG	38.6735	-122.274	180	c	at3	0	1	CA	USA
IND	55	55	The Indians	ca658c	1494	2003	0.36	1718	QUDG	36.1168	-121.462	646	c	at3	0	1	CA	USA
TUO	56	56	Tuolumne River	ca665c	1408	2005	0.3	1566	QUDG	37.865	-119.983	1194	c	at3	0	1	CA	USA
SND	57	57	Sardine Point	SND#ec	831	2012	0.35	1230	JUOC	39.5475	-120.204	2268	a	at3	0	0	CA	USA
CSP	58	58	Calaveras State Park	CSP#e	-40	2012	0.15	1851	SEGI	38.2425	-120.266	1380	a	at3	1	1	CA	USA
SMU	59	59	Sheep Mountain Update	ca667#ec	500	2005	0.45	899	PILO	37.5167	-118.2	3470	e	ITRDB	0	0	CA	USA
PTL	60	60	Patriarch Lower	ca668	1400	2006	0.59	1400	PILO	37.5167	-118.183	3320	e	ITRDB	0	0	CA	USA
CTL	61	61	Cottonwood Lower	ca669	1400	2006	0.5	1400	PILO	37.5167	-118.167	3190	e	ITRDB	0	0	CA	USA
CRS	62	62	Coyote Runs	ca671#e	1400	2009	0.32	1840	PICO	37.6167	-119.017	2770	g	ITRDB	0	1	CA	USA
CSR	63	63	Castle Rock	or098#i	1510	2012	0.47	1710	TSME	42.92	-122.05	2198	g	ITRDB	0	1	OR	USA
LLR	64	64	Llao Rock	or099#i	1566	2012	0.51	1651	TSME	42.97	-122.15	2221	g	ITRDB	0	1	OR	USA
LTS	65	65	Lightning Springs	or100#i	1449	2012	0.44	1552	TSME	42.93	-122.17	2186	g	ITRDB	0	1	OR	USA
MSC	66	66	Mount Scott	or101#i	1508	2012	0.57	1614	TSME	42.93	-122.02	2352	g	ITRDB	0	1	OR	USA
PMC	67	67	Pumice	or102#i	1490	2012	0.44	1617	TSME	42.98	-122.1	2075	g	ITRDB	0	1	OR	USA
PIN	68	68	Pinnacle	or103#i	1569	2012	0.44	1673	TSME	42.91	-122.07	2198	g	ITRDB	0	1	OR	USA
PSD	69	69	Palisade	or104#i	1474	2012	0.4	1700	TSME	42.97	-122.07	2050	g	ITRDB	0	0	OR	USA

## Sheet: KeyToHeadings
Key to column headings
Code = site code, usually 3 characters, unique to the site in this project
Map1 = sites as numbered in this table; also column number for statistics tables on individual sites
Map2 = available cross-reference to sites on a map (could be different than sequential numbering that is in map1)
SiteName.... Name of tree-ring sites; descriptive name, possibly shortened from name in source
FilePrefix = first part of flename of "rwl file" containing measured ring widths, in decade-format as in International Tree-Ring Data Bank
Firstyr = first year of measured ring widths provided in the rwl file; earlier data may exist but was not of interest for this project
Lastyr = last year of measured ring width in the rwl file
rbar = mean between-core Pearson correlation of core indices for the site. This is time-invariant rbar.
EPSyr = first year that expressed population signal (EPS) exceeds the critical value 0.85 in the standard chronology
Species = 4 letter species code (see below)
Lat = latitude in decimal degrees
Lon = longitude in decimal degrees (west negative)
Elevm = representive elevation of site
PI = Principal Investigator or primary collector (no attempt made to include names of all collectors) - see codes below
DataFrom = where we obtained the ring-width data: ay2= California Department of Water resourse project report by Meko et al. (2018); at3
at3=California Department of Water resourse project report by Meko et al. (2015); at3
ITRDG=files downloaded from the International Tree-Ring Data Bank in June 2019
Long = indicator whether site used in reconstruction that goes back to CE 900 (1=yes, 0=no)
Short = indicator whether site used in reconstruction that goes back to CE 1637 (1=yes, 0=no)
State: state containing site
Country: country containing site
SPECIES
JUOC -- Juniperus occidentalis
PIBA -- Pinus balfouriana
PICO -- Pinus contorta
PIFL -- Pinus flexilis
PIJE -- Pinus jeffreyi
PILO -- Pinus longaeva
PIPO -- Pinus ponderosa
PSMA -- Pseudotsuga macrocarpa
QUDG -- Quercus douglasii
SEGI -- Sequoiadendron giganteum
TSME -- Tsuga mertensiana
PI (see references below)
a --D. Meko, C. Woodhouse and R. Touchan (Meko et al., 2014); collectors included S. Malevich and E. Margolis
b --D. Meko and C. Woodhouse and R. Touchan (Meko and Woodhouse, 2018); collectors included E. Bigio amd S. Malevich
c --D. Griffin, D. Stahle (e.g., Stahle et al, 2013; Meko et al., 2011); collectors included M. Therrell
d --D. Meko and C. Woodhouse and R. Touchan (Meko and Woodhouse, 2018); major contributor T. Caprio
e -- M. Salzer and Malcolm Hughes (e.g., Salzer et al., 2014)
f -- Scott St. George (e. g., Appleton and St. George, 2018 )
g - J. King (contribution to International Tree-Ring Data Bank)
REFERENCES
Appleton, S. N., and S. S. George (2018), High-elevation mountain hemlock growth as
a surrogate for cool-season precipitation in Crater Lake National Park, USA, Den-
drochronologia, 52, 20–28, doi:https://dx.doi.org/10.1016/j.dendro.2018.09.003.
Meko, D. M., D. W. Stahle, D. Griffin, and T. A. Knight (2011), Inferring precipitation-
anomaly gradients from tree rings, Quatern. Int., 235, 89–100.
Meko, D. M., C. A. Woodhouse, and K. Morino (2012), Dendrochronology and links to
streamflow, J. Hydrol., 412–413, 200–209.
Meko, D. M., C. A. Woodhouse, and R. Touchan (2014),
Klamath/San Joaquin/Sacramento Hydroclimatic Reconstructions from Tree Rings, Draft Final
Report to California Department of Water Resources Agreement 4600008850, Avail-
able at: http://www.water.ca.gov/waterconditions/docs/tree_ring_report_
Meko, D. M., C. A. Woodhouse, and E. R. Bigio (2018), Southern California Tree-Ring
Study, Final Report to California Department of Water Resources, Agreement
4600011071, Available at https://water.ca.gov/-/media/DWR-Website/Web-Pages/Water-Basics/Drought/Files/Publications-And-Reports/
UofAZ-SoCal-tree-ring-report-dec-2017.pdf.
Salzer, M. W., E. R. Larson, A. G. Bunn, and M. K. Hughes (2014), Changing climate
response in near-treeline bristlecone pine with elevation and aspect, Environ. Res.
Lett., 9:114007, doi:10.1088/1748-9326/9/11/114007.
Stahle, D. W., R. D. Griffin, D. M. Meko, M. D. Therrell, J. R. Edmondson, M. K.
Cleaveland, L. N. Stahle, D. J. Burnette, J. T. Abatzoglou, K. T. Redmond,
M. D. Dettinger, and D. R. Cayan (2013), The ancient blue oak woodlands of
California: longevity and hydroclimatic history, Earth Interact., 17 (12), 1–23, doi:
10.1175/2013EI000518.1.

## Sheet: Additional files
Appendix E	Table E1. Long and short tree-ring reconstructions of water year annual flow along with 50% confidence interval.
Appendix F	Compressed files of original tree-ring width measurements
Appendix G	Time series matrix of the residual site chronologies
