# Supplementary material for: Supporting Restoration Decisions through Integration of Tree-Ring and Modeling Data: Reconstructing Flow and Salinity in the San Francisco Estuary over the Past Millennium
Source: Preprints.org preprint supplement (doi:10.20944/preprints202106.0122.v1), 2021-06-04
Supplement: Supplementary file 2 [file supplementary › Supplementary material/AppendixE.txt]

Table E1. Long and short tree-ring reconstructions of water year annual flow along with 50% confidence interval.
Units are billions of cubic meters (BCM). Confidence intervals estimated from cross-validation
residuals assuming the residuals (in square-root BCM) are normally distributed. With that
assumption, the 50% interval is the reconstructed value plus or minus 0.674 times RMSEcv,
where RMSEcv is the root-mean-square error of cross-validation residuals.
Year	RecLong	Recshort	Observed	L50Long	U50Long	L50Short	U50Short
903	40.52	NaN	NaN	34.64	46.87	NaN	NaN
904	36.35	NaN	NaN	30.79	42.38	NaN	NaN
905	36.48	NaN	NaN	30.91	42.52	NaN	NaN
906	26.53	NaN	NaN	21.81	31.71	NaN	NaN
907	24.17	NaN	NaN	19.68	29.12	NaN	NaN
908	30.71	NaN	NaN	25.62	36.27	NaN	NaN
909	31.66	NaN	NaN	26.48	37.29	NaN	NaN
910	33.27	NaN	NaN	27.96	39.04	NaN	NaN
911	33.12	NaN	NaN	27.82	38.88	NaN	NaN
912	30.21	NaN	NaN	25.16	35.72	NaN	NaN
913	19.12	NaN	NaN	15.15	23.56	NaN	NaN
914	36.65	NaN	NaN	31.07	42.70	NaN	NaN
915	16.15	NaN	NaN	12.52	20.24	NaN	NaN
916	39.44	NaN	NaN	33.64	45.71	NaN	NaN
917	37.31	NaN	NaN	31.68	43.41	NaN	NaN
918	23.31	NaN	NaN	18.91	28.18	NaN	NaN
919	24.36	NaN	NaN	19.85	29.33	NaN	NaN
920	35.96	NaN	NaN	30.43	41.95	NaN	NaN
921	23.15	NaN	NaN	18.76	28.00	NaN	NaN
922	30.59	NaN	NaN	25.50	36.13	NaN	NaN
923	20.79	NaN	NaN	16.64	25.40	NaN	NaN
924	15.59	NaN	NaN	12.03	19.61	NaN	NaN
925	40.13	NaN	NaN	34.28	46.45	NaN	NaN
926	36.56	NaN	NaN	30.98	42.59	NaN	NaN
927	28.10	NaN	NaN	23.23	33.42	NaN	NaN
928	21.16	NaN	NaN	16.97	25.80	NaN	NaN
929	26.90	NaN	NaN	22.15	32.12	NaN	NaN
930	18.46	NaN	NaN	14.57	22.82	NaN	NaN
931	30.03	NaN	NaN	25.00	35.53	NaN	NaN
932	25.83	NaN	NaN	21.18	30.95	NaN	NaN
933	25.89	NaN	NaN	21.23	31.01	NaN	NaN
934	38.80	NaN	NaN	33.05	45.01	NaN	NaN
935	33.01	NaN	NaN	27.72	38.75	NaN	NaN
936	25.12	NaN	NaN	20.53	30.16	NaN	NaN
937	36.94	NaN	NaN	31.33	43.01	NaN	NaN
938	25.63	NaN	NaN	20.99	30.72	NaN	NaN
939	29.30	NaN	NaN	24.33	34.73	NaN	NaN
940	39.34	NaN	NaN	33.55	45.60	NaN	NaN
941	37.55	NaN	NaN	31.89	43.67	NaN	NaN
942	25.07	NaN	NaN	20.49	30.11	NaN	NaN
943	27.67	NaN	NaN	22.85	32.96	NaN	NaN
944	34.94	NaN	NaN	29.49	40.85	NaN	NaN
945	30.03	NaN	NaN	24.99	35.52	NaN	NaN
946	38.30	NaN	NaN	32.59	44.48	NaN	NaN
947	25.46	NaN	NaN	20.85	30.54	NaN	NaN
948	23.17	NaN	NaN	18.78	28.03	NaN	NaN
949	28.65	NaN	NaN	23.74	34.03	NaN	NaN
950	34.24	NaN	NaN	28.85	40.10	NaN	NaN
951	37.13	NaN	NaN	31.51	43.22	NaN	NaN
952	20.58	NaN	NaN	16.45	25.16	NaN	NaN
953	29.43	NaN	NaN	24.45	34.87	NaN	NaN
954	11.75	NaN	NaN	8.69	15.28	NaN	NaN
955	40.51	NaN	NaN	34.62	46.85	NaN	NaN
956	31.35	NaN	NaN	26.20	36.96	NaN	NaN
957	10.60	NaN	NaN	7.71	13.96	NaN	NaN
958	34.33	NaN	NaN	28.93	40.19	NaN	NaN
959	32.54	NaN	NaN	27.29	38.25	NaN	NaN
960	45.43	NaN	NaN	39.19	52.14	NaN	NaN
961	13.54	NaN	NaN	10.23	17.30	NaN	NaN
962	24.57	NaN	NaN	20.04	29.56	NaN	NaN
963	27.94	NaN	NaN	23.09	33.25	NaN	NaN
964	25.92	NaN	NaN	21.26	31.04	NaN	NaN
965	32.95	NaN	NaN	27.67	38.69	NaN	NaN
966	29.21	NaN	NaN	24.25	34.63	NaN	NaN
967	34.94	NaN	NaN	29.49	40.85	NaN	NaN
968	38.23	NaN	NaN	32.52	44.40	NaN	NaN
969	21.66	NaN	NaN	17.42	26.36	NaN	NaN
970	44.22	NaN	NaN	38.07	50.84	NaN	NaN
971	19.39	NaN	NaN	15.39	23.86	NaN	NaN
972	35.53	NaN	NaN	30.03	41.48	NaN	NaN
973	33.52	NaN	NaN	28.19	39.32	NaN	NaN
974	38.44	NaN	NaN	32.71	44.62	NaN	NaN
975	26.02	NaN	NaN	21.35	31.15	NaN	NaN
976	30.15	NaN	NaN	25.10	35.65	NaN	NaN
977	26.63	NaN	NaN	21.90	31.81	NaN	NaN
978	22.45	NaN	NaN	18.12	27.23	NaN	NaN
979	10.87	NaN	NaN	7.93	14.27	NaN	NaN
980	23.97	NaN	NaN	19.50	28.91	NaN	NaN
981	22.34	NaN	NaN	18.03	27.11	NaN	NaN
982	31.91	NaN	NaN	26.71	37.56	NaN	NaN
983	18.09	NaN	NaN	14.24	22.41	NaN	NaN
984	31.97	NaN	NaN	26.77	37.63	NaN	NaN
985	33.83	NaN	NaN	28.48	39.65	NaN	NaN
986	18.44	NaN	NaN	14.54	22.79	NaN	NaN
987	35.63	NaN	NaN	30.13	41.60	NaN	NaN
988	38.51	NaN	NaN	32.78	44.71	NaN	NaN
989	27.89	NaN	NaN	23.05	33.19	NaN	NaN
990	21.48	NaN	NaN	17.26	26.16	NaN	NaN
991	34.28	NaN	NaN	28.88	40.13	NaN	NaN
992	32.73	NaN	NaN	27.47	38.46	NaN	NaN
993	41.24	NaN	NaN	35.30	47.64	NaN	NaN
994	20.44	NaN	NaN	16.33	25.01	NaN	NaN
995	20.62	NaN	NaN	16.48	25.21	NaN	NaN
996	22.41	NaN	NaN	18.09	27.18	NaN	NaN
997	36.32	NaN	NaN	30.76	42.34	NaN	NaN
998	34.77	NaN	NaN	29.33	40.66	NaN	NaN
999	24.76	NaN	NaN	20.21	29.77	NaN	NaN
1000	31.09	NaN	NaN	25.96	36.67	NaN	NaN
1001	27.93	NaN	NaN	23.08	33.23	NaN	NaN
1002	28.82	NaN	NaN	23.90	34.21	NaN	NaN
1003	32.16	NaN	NaN	26.94	37.84	NaN	NaN
1004	34.71	NaN	NaN	29.28	40.60	NaN	NaN
1005	23.34	NaN	NaN	18.93	28.21	NaN	NaN
1006	39.00	NaN	NaN	33.23	45.23	NaN	NaN
1007	21.38	NaN	NaN	17.17	26.05	NaN	NaN
1008	43.12	NaN	NaN	37.04	49.66	NaN	NaN
1009	39.10	NaN	NaN	33.32	45.34	NaN	NaN
1010	25.18	NaN	NaN	20.59	30.23	NaN	NaN
1011	30.85	NaN	NaN	25.74	36.41	NaN	NaN
1012	13.93	NaN	NaN	10.57	17.75	NaN	NaN
1013	39.97	NaN	NaN	34.12	46.27	NaN	NaN
1014	24.48	NaN	NaN	19.96	29.47	NaN	NaN
1015	34.22	NaN	NaN	28.83	40.07	NaN	NaN
1016	31.28	NaN	NaN	26.14	36.88	NaN	NaN
1017	31.90	NaN	NaN	26.71	37.56	NaN	NaN
1018	21.99	NaN	NaN	17.72	26.73	NaN	NaN
1019	38.76	NaN	NaN	33.01	44.97	NaN	NaN
1020	27.50	NaN	NaN	22.69	32.76	NaN	NaN
1021	25.98	NaN	NaN	21.32	31.11	NaN	NaN
1022	19.59	NaN	NaN	15.57	24.08	NaN	NaN
1023	45.13	NaN	NaN	38.91	51.81	NaN	NaN
1024	35.55	NaN	NaN	30.05	41.51	NaN	NaN
1025	18.82	NaN	NaN	14.88	23.21	NaN	NaN
1026	35.19	NaN	NaN	29.72	41.11	NaN	NaN
1027	27.19	NaN	NaN	22.41	32.43	NaN	NaN
1028	27.81	NaN	NaN	22.98	33.11	NaN	NaN
1029	21.65	NaN	NaN	17.41	26.35	NaN	NaN
1030	31.46	NaN	NaN	26.31	37.08	NaN	NaN
1031	38.64	NaN	NaN	32.90	44.85	NaN	NaN
1032	25.50	NaN	NaN	20.88	30.59	NaN	NaN
1033	34.03	NaN	NaN	28.66	39.87	NaN	NaN
1034	23.40	NaN	NaN	18.99	28.28	NaN	NaN
1035	16.20	NaN	NaN	12.56	20.29	NaN	NaN
1036	36.09	NaN	NaN	30.55	42.09	NaN	NaN
1037	21.20	NaN	NaN	17.01	25.86	NaN	NaN
1038	25.58	NaN	NaN	20.96	30.67	NaN	NaN
1039	18.67	NaN	NaN	14.75	23.06	NaN	NaN
1040	22.25	NaN	NaN	17.95	27.01	NaN	NaN
1041	35.06	NaN	NaN	29.60	40.98	NaN	NaN
1042	36.25	NaN	NaN	30.70	42.27	NaN	NaN
1043	23.51	NaN	NaN	19.08	28.39	NaN	NaN
1044	21.08	NaN	NaN	16.90	25.72	NaN	NaN
1045	41.80	NaN	NaN	35.82	48.24	NaN	NaN
1046	23.02	NaN	NaN	18.64	27.86	NaN	NaN
1047	22.74	NaN	NaN	18.39	27.55	NaN	NaN
1048	25.55	NaN	NaN	20.92	30.63	NaN	NaN
1049	31.40	NaN	NaN	26.25	37.02	NaN	NaN
1050	30.54	NaN	NaN	25.46	36.08	NaN	NaN
1051	23.57	NaN	NaN	19.13	28.46	NaN	NaN
1052	10.88	NaN	NaN	7.94	14.28	NaN	NaN
1053	25.03	NaN	NaN	20.46	30.07	NaN	NaN
1054	35.51	NaN	NaN	30.01	41.46	NaN	NaN
1055	18.27	NaN	NaN	14.40	22.61	NaN	NaN
1056	34.56	NaN	NaN	29.15	40.44	NaN	NaN
1057	31.27	NaN	NaN	26.13	36.87	NaN	NaN
1058	26.39	NaN	NaN	21.69	31.56	NaN	NaN
1059	9.31	NaN	NaN	6.61	12.47	NaN	NaN
1060	25.65	NaN	NaN	21.02	30.75	NaN	NaN
1061	35.89	NaN	NaN	30.36	41.87	NaN	NaN
1062	29.80	NaN	NaN	24.79	35.27	NaN	NaN
1063	39.70	NaN	NaN	33.88	45.98	NaN	NaN
1064	40.26	NaN	NaN	34.40	46.59	NaN	NaN
1065	27.97	NaN	NaN	23.12	33.28	NaN	NaN
1066	21.41	NaN	NaN	17.20	26.09	NaN	NaN
1067	28.14	NaN	NaN	23.28	33.47	NaN	NaN
1068	34.42	NaN	NaN	29.02	40.29	NaN	NaN
1069	18.87	NaN	NaN	14.93	23.28	NaN	NaN
1070	9.02	NaN	NaN	6.37	12.14	NaN	NaN
1071	33.26	NaN	NaN	27.95	39.03	NaN	NaN
1072	8.97	NaN	NaN	6.33	12.08	NaN	NaN
1073	33.86	NaN	NaN	28.50	39.68	NaN	NaN
1074	26.06	NaN	NaN	21.38	31.19	NaN	NaN
1075	28.67	NaN	NaN	23.75	34.04	NaN	NaN
1076	36.30	NaN	NaN	30.74	42.32	NaN	NaN
1077	23.83	NaN	NaN	19.37	28.75	NaN	NaN
1078	24.64	NaN	NaN	20.10	29.64	NaN	NaN
1079	37.62	NaN	NaN	31.96	43.75	NaN	NaN
1080	38.78	NaN	NaN	33.03	45.00	NaN	NaN
1081	31.51	NaN	NaN	26.35	37.13	NaN	NaN
1082	16.62	NaN	NaN	12.94	20.77	NaN	NaN
1083	24.48	NaN	NaN	19.96	29.47	NaN	NaN
1084	34.13	NaN	NaN	28.75	39.97	NaN	NaN
1085	29.10	NaN	NaN	24.15	34.51	NaN	NaN
1086	28.01	NaN	NaN	23.15	33.32	NaN	NaN
1087	39.20	NaN	NaN	33.42	45.45	NaN	NaN
1088	27.23	NaN	NaN	22.45	32.47	NaN	NaN
1089	36.51	NaN	NaN	30.93	42.54	NaN	NaN
1090	20.55	NaN	NaN	16.42	25.13	NaN	NaN
1091	37.32	NaN	NaN	31.69	43.42	NaN	NaN
1092	18.26	NaN	NaN	14.38	22.59	NaN	NaN
1093	17.57	NaN	NaN	13.77	21.82	NaN	NaN
1094	27.06	NaN	NaN	22.29	32.28	NaN	NaN
1095	35.20	NaN	NaN	29.73	41.13	NaN	NaN
1096	28.89	NaN	NaN	23.95	34.28	NaN	NaN
1097	24.14	NaN	NaN	19.65	29.09	NaN	NaN
1098	12.86	NaN	NaN	9.65	16.54	NaN	NaN
1099	30.81	NaN	NaN	25.71	36.37	NaN	NaN
1100	42.59	NaN	NaN	36.55	49.09	NaN	NaN
1101	30.63	NaN	NaN	25.54	36.18	NaN	NaN
1102	29.37	NaN	NaN	24.40	34.81	NaN	NaN
1103	22.42	NaN	NaN	18.10	27.20	NaN	NaN
1104	25.23	NaN	NaN	20.63	30.28	NaN	NaN
1105	36.31	NaN	NaN	30.75	42.33	NaN	NaN
1106	19.69	NaN	NaN	15.66	24.18	NaN	NaN
1107	27.89	NaN	NaN	23.05	33.19	NaN	NaN
1108	37.58	NaN	NaN	31.92	43.70	NaN	NaN
1109	32.08	NaN	NaN	26.87	37.76	NaN	NaN
1110	26.49	NaN	NaN	21.77	31.66	NaN	NaN
1111	31.77	NaN	NaN	26.58	37.41	NaN	NaN
1112	35.41	NaN	NaN	29.93	41.36	NaN	NaN
1113	42.12	NaN	NaN	36.12	48.59	NaN	NaN
1114	18.98	NaN	NaN	15.03	23.40	NaN	NaN
1115	18.17	NaN	NaN	14.31	22.50	NaN	NaN
1116	40.23	NaN	NaN	34.37	46.56	NaN	NaN
1117	25.28	NaN	NaN	20.68	30.34	NaN	NaN
1118	29.49	NaN	NaN	24.50	34.93	NaN	NaN
1119	27.69	NaN	NaN	22.86	32.97	NaN	NaN
1120	33.37	NaN	NaN	28.05	39.15	NaN	NaN
1121	28.94	NaN	NaN	24.00	34.34	NaN	NaN
1122	38.30	NaN	NaN	32.59	44.48	NaN	NaN
1123	9.44	NaN	NaN	6.72	12.63	NaN	NaN
1124	28.85	NaN	NaN	23.92	34.24	NaN	NaN
1125	31.79	NaN	NaN	26.61	37.44	NaN	NaN
1126	10.26	NaN	NaN	7.41	13.57	NaN	NaN
1127	40.03	NaN	NaN	34.18	46.34	NaN	NaN
1128	33.75	NaN	NaN	28.40	39.56	NaN	NaN
1129	37.47	NaN	NaN	31.82	43.59	NaN	NaN
1130	26.23	NaN	NaN	21.54	31.38	NaN	NaN
1131	20.30	NaN	NaN	16.20	24.85	NaN	NaN
1132	29.75	NaN	NaN	24.74	35.22	NaN	NaN
1133	23.12	NaN	NaN	18.73	27.97	NaN	NaN
1134	26.59	NaN	NaN	21.86	31.77	NaN	NaN
1135	21.65	NaN	NaN	17.41	26.35	NaN	NaN
1136	36.67	NaN	NaN	31.08	42.72	NaN	NaN
1137	25.04	NaN	NaN	20.46	30.08	NaN	NaN
1138	29.89	NaN	NaN	24.87	35.38	NaN	NaN
1139	24.78	NaN	NaN	20.23	29.80	NaN	NaN
1140	16.75	NaN	NaN	13.05	20.91	NaN	NaN
1141	25.98	NaN	NaN	21.32	31.11	NaN	NaN
1142	24.34	NaN	NaN	19.83	29.31	NaN	NaN
1143	23.15	NaN	NaN	18.76	28.00	NaN	NaN
1144	24.16	NaN	NaN	19.67	29.11	NaN	NaN
1145	18.75	NaN	NaN	14.82	23.14	NaN	NaN
1146	26.47	NaN	NaN	21.76	31.65	NaN	NaN
1147	29.47	NaN	NaN	24.49	34.92	NaN	NaN
1148	22.03	NaN	NaN	17.75	26.77	NaN	NaN
1149	36.19	NaN	NaN	30.64	42.20	NaN	NaN
1150	18.73	NaN	NaN	14.80	23.12	NaN	NaN
1151	31.53	NaN	NaN	26.37	37.16	NaN	NaN
1152	18.54	NaN	NaN	14.63	22.90	NaN	NaN
1153	34.35	NaN	NaN	28.95	40.22	NaN	NaN
1154	32.25	NaN	NaN	27.02	37.93	NaN	NaN
1155	20.49	NaN	NaN	16.38	25.07	NaN	NaN
1156	16.11	NaN	NaN	12.48	20.20	NaN	NaN
1157	20.44	NaN	NaN	16.33	25.02	NaN	NaN
1158	26.94	NaN	NaN	22.19	32.16	NaN	NaN
1159	34.21	NaN	NaN	28.82	40.06	NaN	NaN
1160	32.34	NaN	NaN	27.11	38.03	NaN	NaN
1161	24.42	NaN	NaN	19.90	29.40	NaN	NaN
1162	26.93	NaN	NaN	22.18	32.15	NaN	NaN
1163	27.16	NaN	NaN	22.39	32.40	NaN	NaN
1164	19.34	NaN	NaN	15.34	23.79	NaN	NaN
1165	42.28	NaN	NaN	36.26	48.76	NaN	NaN
1166	31.79	NaN	NaN	26.61	37.44	NaN	NaN
1167	35.82	NaN	NaN	30.30	41.80	NaN	NaN
1168	15.92	NaN	NaN	12.32	19.99	NaN	NaN
1169	45.73	NaN	NaN	39.46	52.45	NaN	NaN
1170	12.44	NaN	NaN	9.28	16.06	NaN	NaN
1171	36.06	NaN	NaN	30.52	42.05	NaN	NaN
1172	24.49	NaN	NaN	19.97	29.47	NaN	NaN
1173	27.44	NaN	NaN	22.64	32.70	NaN	NaN
1174	21.34	NaN	NaN	17.13	26.01	NaN	NaN
1175	28.64	NaN	NaN	23.73	34.02	NaN	NaN
1176	19.21	NaN	NaN	15.23	23.66	NaN	NaN
1177	24.78	NaN	NaN	20.23	29.80	NaN	NaN
1178	39.12	NaN	NaN	33.34	45.36	NaN	NaN
1179	29.03	NaN	NaN	24.09	34.44	NaN	NaN
1180	29.73	NaN	NaN	24.72	35.20	NaN	NaN
1181	33.79	NaN	NaN	28.44	39.61	NaN	NaN
1182	24.96	NaN	NaN	20.39	29.99	NaN	NaN
1183	10.28	NaN	NaN	7.43	13.60	NaN	NaN
1184	36.70	NaN	NaN	31.11	42.75	NaN	NaN
1185	23.10	NaN	NaN	18.71	27.95	NaN	NaN
1186	35.14	NaN	NaN	29.68	41.07	NaN	NaN
1187	16.46	NaN	NaN	12.79	20.59	NaN	NaN
1188	40.19	NaN	NaN	34.33	46.51	NaN	NaN
1189	27.20	NaN	NaN	22.42	32.44	NaN	NaN
1190	37.73	NaN	NaN	32.06	43.87	NaN	NaN
1191	25.44	NaN	NaN	20.83	30.52	NaN	NaN
1192	30.93	NaN	NaN	25.82	36.51	NaN	NaN
1193	34.89	NaN	NaN	29.44	40.79	NaN	NaN
1194	31.94	NaN	NaN	26.74	37.60	NaN	NaN
1195	46.56	NaN	NaN	40.24	53.35	NaN	NaN
1196	23.37	NaN	NaN	18.96	28.25	NaN	NaN
1197	33.96	NaN	NaN	28.59	39.79	NaN	NaN
1198	22.97	NaN	NaN	18.60	27.81	NaN	NaN
1199	33.95	NaN	NaN	28.58	39.77	NaN	NaN
1200	32.13	NaN	NaN	26.92	37.81	NaN	NaN
1201	20.67	NaN	NaN	16.53	25.27	NaN	NaN
1202	38.53	NaN	NaN	32.80	44.72	NaN	NaN
1203	32.17	NaN	NaN	26.96	37.85	NaN	NaN
1204	41.68	NaN	NaN	35.71	48.12	NaN	NaN
1205	25.33	NaN	NaN	20.73	30.40	NaN	NaN
1206	13.52	NaN	NaN	10.22	17.29	NaN	NaN
1207	27.44	NaN	NaN	22.64	32.71	NaN	NaN
1208	20.94	NaN	NaN	16.78	25.57	NaN	NaN
1209	38.90	NaN	NaN	33.14	45.12	NaN	NaN
1210	25.20	NaN	NaN	20.61	30.25	NaN	NaN
1211	30.46	NaN	NaN	25.39	35.99	NaN	NaN
1212	26.60	NaN	NaN	21.88	31.79	NaN	NaN
1213	19.77	NaN	NaN	15.73	24.27	NaN	NaN
1214	40.18	NaN	NaN	34.32	46.50	NaN	NaN
1215	24.25	NaN	NaN	19.75	29.21	NaN	NaN
1216	40.57	NaN	NaN	34.68	46.92	NaN	NaN
1217	13.77	NaN	NaN	10.44	17.57	NaN	NaN
1218	23.35	NaN	NaN	18.94	28.22	NaN	NaN
1219	35.69	NaN	NaN	30.18	41.66	NaN	NaN
1220	37.61	NaN	NaN	31.95	43.74	NaN	NaN
1221	28.02	NaN	NaN	23.16	33.33	NaN	NaN
1222	32.21	NaN	NaN	26.99	37.89	NaN	NaN
1223	26.15	NaN	NaN	21.47	31.29	NaN	NaN
1224	40.29	NaN	NaN	34.42	46.61	NaN	NaN
1225	35.99	NaN	NaN	30.46	41.99	NaN	NaN
1226	18.81	NaN	NaN	14.87	23.20	NaN	NaN
1227	18.66	NaN	NaN	14.75	23.05	NaN	NaN
1228	35.23	NaN	NaN	29.76	41.16	NaN	NaN
1229	39.02	NaN	NaN	33.25	45.25	NaN	NaN
1230	23.23	NaN	NaN	18.83	28.09	NaN	NaN
1231	18.60	NaN	NaN	14.69	22.98	NaN	NaN
1232	36.32	NaN	NaN	30.76	42.34	NaN	NaN
1233	29.01	NaN	NaN	24.06	34.41	NaN	NaN
1234	26.21	NaN	NaN	21.52	31.36	NaN	NaN
1235	26.19	NaN	NaN	21.50	31.33	NaN	NaN
1236	13.69	NaN	NaN	10.37	17.47	NaN	NaN
1237	21.80	NaN	NaN	17.55	26.52	NaN	NaN
1238	31.57	NaN	NaN	26.40	37.19	NaN	NaN
1239	24.36	NaN	NaN	19.85	29.33	NaN	NaN
1240	38.41	NaN	NaN	32.69	44.60	NaN	NaN
1241	39.91	NaN	NaN	34.07	46.21	NaN	NaN
1242	22.88	NaN	NaN	18.51	27.70	NaN	NaN
1243	26.63	NaN	NaN	21.90	31.82	NaN	NaN
1244	20.02	NaN	NaN	15.95	24.55	NaN	NaN
1245	20.96	NaN	NaN	16.80	25.59	NaN	NaN
1246	36.55	NaN	NaN	30.98	42.59	NaN	NaN
1247	33.39	NaN	NaN	28.07	39.17	NaN	NaN
1248	39.00	NaN	NaN	33.23	45.23	NaN	NaN
1249	30.15	NaN	NaN	25.11	35.66	NaN	NaN
1250	15.00	NaN	NaN	11.51	18.95	NaN	NaN
1251	27.73	NaN	NaN	22.90	33.02	NaN	NaN
1252	40.06	NaN	NaN	34.21	46.37	NaN	NaN
1253	28.60	NaN	NaN	23.70	33.97	NaN	NaN
1254	17.63	NaN	NaN	13.83	21.90	NaN	NaN
1255	34.52	NaN	NaN	29.10	40.39	NaN	NaN
1256	40.20	NaN	NaN	34.34	46.52	NaN	NaN
1257	13.04	NaN	NaN	9.80	16.74	NaN	NaN
1258	25.62	NaN	NaN	20.98	30.71	NaN	NaN
1259	33.82	NaN	NaN	28.46	39.63	NaN	NaN
1260	18.33	NaN	NaN	14.45	22.67	NaN	NaN
1261	25.81	NaN	NaN	21.16	30.92	NaN	NaN
1262	48.35	NaN	NaN	41.90	55.26	NaN	NaN
1263	24.34	NaN	NaN	19.83	29.31	NaN	NaN
1264	12.29	NaN	NaN	9.15	15.88	NaN	NaN
1265	29.68	NaN	NaN	24.68	35.15	NaN	NaN
1266	32.78	NaN	NaN	27.51	38.51	NaN	NaN
1267	31.88	NaN	NaN	26.68	37.53	NaN	NaN
1268	26.27	NaN	NaN	21.58	31.42	NaN	NaN
1269	26.25	NaN	NaN	21.56	31.40	NaN	NaN
1270	46.24	NaN	NaN	39.94	53.01	NaN	NaN
1271	24.09	NaN	NaN	19.61	29.04	NaN	NaN
1272	26.67	NaN	NaN	21.94	31.86	NaN	NaN
1273	14.24	NaN	NaN	10.84	18.09	NaN	NaN
1274	39.00	NaN	NaN	33.24	45.23	NaN	NaN
1275	20.93	NaN	NaN	16.77	25.56	NaN	NaN
1276	30.82	NaN	NaN	25.71	36.38	NaN	NaN
1277	35.61	NaN	NaN	30.11	41.57	NaN	NaN
1278	25.78	NaN	NaN	21.14	30.89	NaN	NaN
1279	16.96	NaN	NaN	13.24	21.15	NaN	NaN
1280	38.94	NaN	NaN	33.18	45.17	NaN	NaN
1281	24.29	NaN	NaN	19.79	29.26	NaN	NaN
1282	40.63	NaN	NaN	34.74	46.98	NaN	NaN
1283	34.31	NaN	NaN	28.92	40.17	NaN	NaN
1284	21.21	NaN	NaN	17.02	25.87	NaN	NaN
1285	13.36	NaN	NaN	10.08	17.11	NaN	NaN
1286	41.52	NaN	NaN	35.56	47.94	NaN	NaN
1287	40.27	NaN	NaN	34.41	46.60	NaN	NaN
1288	24.17	NaN	NaN	19.68	29.12	NaN	NaN
1289	30.42	NaN	NaN	25.35	35.94	NaN	NaN
1290	32.85	NaN	NaN	27.58	38.59	NaN	NaN
1291	41.14	NaN	NaN	35.21	47.53	NaN	NaN
1292	13.28	NaN	NaN	10.01	17.02	NaN	NaN
1293	27.75	NaN	NaN	22.92	33.04	NaN	NaN
1294	25.00	NaN	NaN	20.43	30.04	NaN	NaN
1295	27.49	NaN	NaN	22.69	32.76	NaN	NaN
1296	3.98	NaN	NaN	2.29	6.13	NaN	NaN
1297	37.41	NaN	NaN	31.77	43.52	NaN	NaN
1298	33.20	NaN	NaN	27.90	38.97	NaN	NaN
1299	26.71	NaN	NaN	21.97	31.90	NaN	NaN
1300	21.92	NaN	NaN	17.65	26.64	NaN	NaN
1301	29.32	NaN	NaN	24.35	34.76	NaN	NaN
1302	35.36	NaN	NaN	29.88	41.30	NaN	NaN
1303	28.84	NaN	NaN	23.91	34.23	NaN	NaN
1304	30.27	NaN	NaN	25.21	35.78	NaN	NaN
1305	36.52	NaN	NaN	30.95	42.56	NaN	NaN
1306	24.92	NaN	NaN	20.36	29.95	NaN	NaN
1307	24.47	NaN	NaN	19.95	29.45	NaN	NaN
1308	36.86	NaN	NaN	31.26	42.92	NaN	NaN
1309	14.79	NaN	NaN	11.33	18.72	NaN	NaN
1310	35.32	NaN	NaN	29.84	41.26	NaN	NaN
1311	22.00	NaN	NaN	17.72	26.73	NaN	NaN
1312	33.85	NaN	NaN	28.49	39.67	NaN	NaN
1313	36.41	NaN	NaN	30.84	42.43	NaN	NaN
1314	39.95	NaN	NaN	34.11	46.25	NaN	NaN
1315	22.27	NaN	NaN	17.97	27.04	NaN	NaN
1316	17.01	NaN	NaN	13.28	21.20	NaN	NaN
1317	30.15	NaN	NaN	25.11	35.66	NaN	NaN
1318	37.88	NaN	NaN	32.20	44.02	NaN	NaN
1319	30.24	NaN	NaN	25.19	35.75	NaN	NaN
1320	26.68	NaN	NaN	21.95	31.87	NaN	NaN
1321	26.95	NaN	NaN	22.19	32.17	NaN	NaN
1322	34.42	NaN	NaN	29.01	40.28	NaN	NaN
1323	31.36	NaN	NaN	26.21	36.97	NaN	NaN
1324	17.55	NaN	NaN	13.75	21.80	NaN	NaN
1325	27.82	NaN	NaN	22.99	33.12	NaN	NaN
1326	37.39	NaN	NaN	31.75	43.50	NaN	NaN
1327	47.46	NaN	NaN	41.07	54.31	NaN	NaN
1328	25.58	NaN	NaN	20.95	30.66	NaN	NaN
1329	27.20	NaN	NaN	22.42	32.44	NaN	NaN
1330	50.15	NaN	NaN	43.58	57.19	NaN	NaN
1331	37.60	NaN	NaN	31.94	43.72	NaN	NaN
1332	20.76	NaN	NaN	16.61	25.37	NaN	NaN
1333	26.25	NaN	NaN	21.56	31.41	NaN	NaN
1334	33.92	NaN	NaN	28.56	39.75	NaN	NaN
1335	13.53	NaN	NaN	10.23	17.29	NaN	NaN
1336	32.83	NaN	NaN	27.56	38.57	NaN	NaN
1337	43.09	NaN	NaN	37.02	49.63	NaN	NaN
1338	30.10	NaN	NaN	25.06	35.60	NaN	NaN
1339	30.06	NaN	NaN	25.03	35.56	NaN	NaN
1340	24.87	NaN	NaN	20.31	29.89	NaN	NaN
1341	41.71	NaN	NaN	35.74	48.15	NaN	NaN
1342	27.83	NaN	NaN	22.99	33.13	NaN	NaN
1343	30.41	NaN	NaN	25.35	35.94	NaN	NaN
1344	25.66	NaN	NaN	21.03	30.76	NaN	NaN
1345	35.44	NaN	NaN	29.95	41.39	NaN	NaN
1346	36.16	NaN	NaN	30.62	42.17	NaN	NaN
1347	29.02	NaN	NaN	24.08	34.43	NaN	NaN
1348	25.07	NaN	NaN	20.49	30.11	NaN	NaN
1349	36.60	NaN	NaN	31.02	42.64	NaN	NaN
1350	26.16	NaN	NaN	21.47	31.30	NaN	NaN
1351	11.61	NaN	NaN	8.56	15.11	NaN	NaN
1352	18.01	NaN	NaN	14.17	22.32	NaN	NaN
1353	30.29	NaN	NaN	25.24	35.81	NaN	NaN
1354	24.27	NaN	NaN	19.77	29.23	NaN	NaN
1355	14.58	NaN	NaN	11.14	18.47	NaN	NaN
1356	46.72	NaN	NaN	40.38	53.51	NaN	NaN
1357	29.37	NaN	NaN	24.39	34.80	NaN	NaN
1358	12.58	NaN	NaN	9.40	16.21	NaN	NaN
1359	35.00	NaN	NaN	29.54	40.91	NaN	NaN
1360	32.77	NaN	NaN	27.50	38.50	NaN	NaN
1361	21.85	NaN	NaN	17.59	26.58	NaN	NaN
1362	29.65	NaN	NaN	24.65	35.11	NaN	NaN
1363	29.97	NaN	NaN	24.94	35.45	NaN	NaN
1364	24.32	NaN	NaN	19.81	29.29	NaN	NaN
1365	19.00	NaN	NaN	15.05	23.42	NaN	NaN
1366	40.66	NaN	NaN	34.77	47.02	NaN	NaN
1367	38.50	NaN	NaN	32.77	44.69	NaN	NaN
1368	40.93	NaN	NaN	35.02	47.31	NaN	NaN
1369	25.36	NaN	NaN	20.75	30.42	NaN	NaN
1370	28.25	NaN	NaN	23.37	33.59	NaN	NaN
1371	21.64	NaN	NaN	17.40	26.34	NaN	NaN
1372	29.34	NaN	NaN	24.37	34.78	NaN	NaN
1373	34.09	NaN	NaN	28.71	39.93	NaN	NaN
1374	30.99	NaN	NaN	25.87	36.57	NaN	NaN
1375	24.68	NaN	NaN	20.13	29.68	NaN	NaN
1376	33.61	NaN	NaN	28.27	39.41	NaN	NaN
1377	5.17	NaN	NaN	3.21	7.58	NaN	NaN
1378	39.90	NaN	NaN	34.06	46.20	NaN	NaN
1379	19.83	NaN	NaN	15.78	24.34	NaN	NaN
1380	37.62	NaN	NaN	31.96	43.74	NaN	NaN
1381	35.10	NaN	NaN	29.64	41.02	NaN	NaN
1382	28.99	NaN	NaN	24.05	34.39	NaN	NaN
1383	35.86	NaN	NaN	30.34	41.84	NaN	NaN
1384	20.72	NaN	NaN	16.58	25.32	NaN	NaN
1385	41.17	NaN	NaN	35.24	47.56	NaN	NaN
1386	28.47	NaN	NaN	23.57	33.82	NaN	NaN
1387	34.55	NaN	NaN	29.14	40.43	NaN	NaN
1388	36.33	NaN	NaN	30.77	42.35	NaN	NaN
1389	39.12	NaN	NaN	33.34	45.36	NaN	NaN
1390	12.11	NaN	NaN	9.00	15.68	NaN	NaN
1391	27.60	NaN	NaN	22.78	32.88	NaN	NaN
1392	31.14	NaN	NaN	26.01	36.73	NaN	NaN
1393	35.76	NaN	NaN	30.25	41.74	NaN	NaN
1394	32.54	NaN	NaN	27.29	38.25	NaN	NaN
1395	18.37	NaN	NaN	14.48	22.71	NaN	NaN
1396	19.11	NaN	NaN	15.14	23.54	NaN	NaN
1397	24.98	NaN	NaN	20.41	30.01	NaN	NaN
1398	31.85	NaN	NaN	26.66	37.50	NaN	NaN
1399	29.77	NaN	NaN	24.76	35.24	NaN	NaN
1400	24.90	NaN	NaN	20.34	29.93	NaN	NaN
1401	32.66	NaN	NaN	27.40	38.38	NaN	NaN
1402	24.67	NaN	NaN	20.13	29.67	NaN	NaN
1403	31.42	NaN	NaN	26.26	37.03	NaN	NaN
1404	29.53	NaN	NaN	24.54	34.98	NaN	NaN
1405	29.82	NaN	NaN	24.81	35.30	NaN	NaN
1406	32.89	NaN	NaN	27.61	38.63	NaN	NaN
1407	17.52	NaN	NaN	13.73	21.77	NaN	NaN
1408	25.90	NaN	NaN	21.24	31.02	NaN	NaN
1409	33.18	NaN	NaN	27.88	38.95	NaN	NaN
1410	10.85	NaN	NaN	7.92	14.25	NaN	NaN
1411	44.31	NaN	NaN	38.15	50.94	NaN	NaN
1412	39.08	NaN	NaN	33.30	45.31	NaN	NaN
1413	7.10	NaN	NaN	4.77	9.88	NaN	NaN
1414	35.24	NaN	NaN	29.77	41.18	NaN	NaN
1415	29.17	NaN	NaN	24.21	34.59	NaN	NaN
1416	30.80	NaN	NaN	25.70	36.36	NaN	NaN
1417	31.77	NaN	NaN	26.59	37.42	NaN	NaN
1418	27.36	NaN	NaN	22.57	32.62	NaN	NaN
1419	23.98	NaN	NaN	19.51	28.92	NaN	NaN
1420	49.90	NaN	NaN	43.34	56.92	NaN	NaN
1421	24.10	NaN	NaN	19.62	29.05	NaN	NaN
1422	44.66	NaN	NaN	38.47	51.31	NaN	NaN
1423	39.27	NaN	NaN	33.48	45.52	NaN	NaN
1424	36.73	NaN	NaN	31.14	42.78	NaN	NaN
1425	11.33	NaN	NaN	8.33	14.80	NaN	NaN
1426	14.08	NaN	NaN	10.71	17.91	NaN	NaN
1427	30.85	NaN	NaN	25.75	36.42	NaN	NaN
1428	22.37	NaN	NaN	18.06	27.15	NaN	NaN
1429	41.37	NaN	NaN	35.43	47.78	NaN	NaN
1430	28.54	NaN	NaN	23.64	33.90	NaN	NaN
1431	22.73	NaN	NaN	18.38	27.54	NaN	NaN
1432	17.46	NaN	NaN	13.68	21.71	NaN	NaN
1433	31.98	NaN	NaN	26.78	37.64	NaN	NaN
1434	24.97	NaN	NaN	20.40	30.00	NaN	NaN
1435	35.45	NaN	NaN	29.96	41.40	NaN	NaN
1436	26.78	NaN	NaN	22.04	31.98	NaN	NaN
1437	27.95	NaN	NaN	23.10	33.26	NaN	NaN
1438	22.67	NaN	NaN	18.33	27.48	NaN	NaN
1439	24.06	NaN	NaN	19.58	29.00	NaN	NaN
1440	50.23	NaN	NaN	43.66	57.27	NaN	NaN
1441	39.58	NaN	NaN	33.77	45.85	NaN	NaN
1442	27.44	NaN	NaN	22.64	32.70	NaN	NaN
1443	24.30	NaN	NaN	19.80	29.27	NaN	NaN
1444	23.65	NaN	NaN	19.21	28.55	NaN	NaN
1445	43.82	NaN	NaN	37.69	50.41	NaN	NaN
1446	25.81	NaN	NaN	21.16	30.92	NaN	NaN
1447	38.81	NaN	NaN	33.05	45.02	NaN	NaN
1448	24.53	NaN	NaN	20.00	29.52	NaN	NaN
1449	29.94	NaN	NaN	24.92	35.43	NaN	NaN
1450	26.13	NaN	NaN	21.45	31.28	NaN	NaN
1451	22.27	NaN	NaN	17.97	27.04	NaN	NaN
1452	22.72	NaN	NaN	18.38	27.53	NaN	NaN
1453	31.95	NaN	NaN	26.75	37.61	NaN	NaN
1454	24.70	NaN	NaN	20.16	29.71	NaN	NaN
1455	29.92	NaN	NaN	24.89	35.40	NaN	NaN
1456	23.35	NaN	NaN	18.94	28.22	NaN	NaN
1457	24.33	NaN	NaN	19.82	29.29	NaN	NaN
1458	16.64	NaN	NaN	12.95	20.79	NaN	NaN
1459	19.35	NaN	NaN	15.36	23.81	NaN	NaN
1460	29.08	NaN	NaN	24.13	34.49	NaN	NaN
1461	30.72	NaN	NaN	25.63	36.28	NaN	NaN
1462	33.32	NaN	NaN	28.01	39.10	NaN	NaN
1463	36.27	NaN	NaN	30.71	42.28	NaN	NaN
1464	22.10	NaN	NaN	17.81	26.85	NaN	NaN
1465	23.55	NaN	NaN	19.12	28.44	NaN	NaN
1466	26.74	NaN	NaN	22.00	31.94	NaN	NaN
1467	38.09	NaN	NaN	32.39	44.25	NaN	NaN
1468	11.72	NaN	NaN	8.66	15.24	NaN	NaN
1469	40.86	NaN	NaN	34.95	47.23	NaN	NaN
1470	37.93	NaN	NaN	32.25	44.08	NaN	NaN
1471	24.62	NaN	NaN	20.08	29.62	NaN	NaN
1472	31.69	NaN	NaN	26.52	37.33	NaN	NaN
1473	18.44	NaN	NaN	14.55	22.80	NaN	NaN
1474	21.16	NaN	NaN	16.97	25.81	NaN	NaN
1475	14.62	NaN	NaN	11.17	18.52	NaN	NaN
1476	23.46	NaN	NaN	19.04	28.35	NaN	NaN
1477	32.66	NaN	NaN	27.40	38.38	NaN	NaN
1478	32.35	NaN	NaN	27.11	38.04	NaN	NaN
1479	12.39	NaN	NaN	9.24	16.00	NaN	NaN
1480	27.78	NaN	NaN	22.95	33.08	NaN	NaN
1481	33.65	NaN	NaN	28.31	39.45	NaN	NaN
1482	27.48	NaN	NaN	22.67	32.74	NaN	NaN
1483	28.48	NaN	NaN	23.58	33.84	NaN	NaN
1484	27.39	NaN	NaN	22.60	32.65	NaN	NaN
1485	28.40	NaN	NaN	23.51	33.75	NaN	NaN
1486	36.42	NaN	NaN	30.85	42.44	NaN	NaN
1487	24.91	NaN	NaN	20.35	29.94	NaN	NaN
1488	28.58	NaN	NaN	23.68	33.95	NaN	NaN
1489	30.65	NaN	NaN	25.57	36.20	NaN	NaN
1490	31.47	NaN	NaN	26.31	37.09	NaN	NaN
1491	31.08	NaN	NaN	25.95	36.66	NaN	NaN
1492	26.14	NaN	NaN	21.46	31.28	NaN	NaN
1493	36.48	NaN	NaN	30.91	42.52	NaN	NaN
1494	30.17	NaN	NaN	25.12	35.68	NaN	NaN
1495	25.96	NaN	NaN	21.30	31.09	NaN	NaN
1496	27.28	NaN	NaN	22.49	32.53	NaN	NaN
1497	12.90	NaN	NaN	9.68	16.58	NaN	NaN
1498	33.38	NaN	NaN	28.06	39.16	NaN	NaN
1499	15.75	NaN	NaN	12.17	19.79	NaN	NaN
1500	13.96	NaN	NaN	10.60	17.78	NaN	NaN
1501	37.12	NaN	NaN	31.50	43.21	NaN	NaN
1502	25.50	NaN	NaN	20.88	30.58	NaN	NaN
1503	42.89	NaN	NaN	36.83	49.41	NaN	NaN
1504	37.95	NaN	NaN	32.26	44.10	NaN	NaN
1505	24.62	NaN	NaN	20.09	29.62	NaN	NaN
1506	24.88	NaN	NaN	20.32	29.90	NaN	NaN
1507	27.31	NaN	NaN	22.52	32.57	NaN	NaN
1508	22.59	NaN	NaN	18.26	27.39	NaN	NaN
1509	26.29	NaN	NaN	21.59	31.44	NaN	NaN
1510	23.69	NaN	NaN	19.24	28.59	NaN	NaN
1511	24.75	NaN	NaN	20.20	29.76	NaN	NaN
1512	31.95	NaN	NaN	26.75	37.61	NaN	NaN
1513	28.11	NaN	NaN	23.25	33.44	NaN	NaN
1514	27.05	NaN	NaN	22.29	32.28	NaN	NaN
1515	15.07	NaN	NaN	11.57	19.03	NaN	NaN
1516	28.76	NaN	NaN	23.83	34.14	NaN	NaN
1517	31.25	NaN	NaN	26.11	36.85	NaN	NaN
1518	12.60	NaN	NaN	9.42	16.24	NaN	NaN
1519	31.26	NaN	NaN	26.12	36.86	NaN	NaN
1520	26.63	NaN	NaN	21.90	31.81	NaN	NaN
1521	24.49	NaN	NaN	19.97	29.48	NaN	NaN
1522	30.43	NaN	NaN	25.36	35.96	NaN	NaN
1523	26.49	NaN	NaN	21.77	31.66	NaN	NaN
1524	39.35	NaN	NaN	33.55	45.60	NaN	NaN
1525	34.98	NaN	NaN	29.53	40.89	NaN	NaN
1526	29.79	NaN	NaN	24.78	35.26	NaN	NaN
1527	34.21	NaN	NaN	28.82	40.05	NaN	NaN
1528	28.32	NaN	NaN	23.44	33.66	NaN	NaN
1529	13.92	NaN	NaN	10.57	17.74	NaN	NaN
1530	39.05	NaN	NaN	33.28	45.29	NaN	NaN
1531	26.10	NaN	NaN	21.42	31.24	NaN	NaN
1532	9.80	NaN	NaN	7.02	13.04	NaN	NaN
1533	23.79	NaN	NaN	19.34	28.71	NaN	NaN
1534	31.64	NaN	NaN	26.47	37.27	NaN	NaN
1535	35.83	NaN	NaN	30.31	41.81	NaN	NaN
1536	38.06	NaN	NaN	32.36	44.22	NaN	NaN
1537	17.09	NaN	NaN	13.35	21.29	NaN	NaN
1538	33.69	NaN	NaN	28.34	39.49	NaN	NaN
1539	45.63	NaN	NaN	39.37	52.35	NaN	NaN
1540	19.22	NaN	NaN	15.24	23.66	NaN	NaN
1541	16.78	NaN	NaN	13.07	20.95	NaN	NaN
1542	30.16	NaN	NaN	25.12	35.67	NaN	NaN
1543	31.54	NaN	NaN	26.38	37.17	NaN	NaN
1544	38.08	NaN	NaN	32.38	44.24	NaN	NaN
1545	26.31	NaN	NaN	21.61	31.46	NaN	NaN
1546	28.05	NaN	NaN	23.20	33.37	NaN	NaN
1547	28.21	NaN	NaN	23.34	33.54	NaN	NaN
1548	11.31	NaN	NaN	8.31	14.78	NaN	NaN
1549	36.18	NaN	NaN	30.64	42.19	NaN	NaN
1550	22.64	NaN	NaN	18.30	27.45	NaN	NaN
1551	35.31	NaN	NaN	29.84	41.25	NaN	NaN
1552	33.91	NaN	NaN	28.54	39.73	NaN	NaN
1553	42.55	NaN	NaN	36.51	49.04	NaN	NaN
1554	12.33	NaN	NaN	9.19	15.93	NaN	NaN
1555	24.13	NaN	NaN	19.65	29.08	NaN	NaN
1556	32.07	NaN	NaN	26.86	37.74	NaN	NaN
1557	39.80	NaN	NaN	33.97	46.10	NaN	NaN
1558	31.26	NaN	NaN	26.12	36.87	NaN	NaN
1559	38.87	NaN	NaN	33.11	45.09	NaN	NaN
1560	38.71	NaN	NaN	32.97	44.92	NaN	NaN
1561	27.68	NaN	NaN	22.86	32.97	NaN	NaN
1562	29.88	NaN	NaN	24.86	35.36	NaN	NaN
1563	31.84	NaN	NaN	26.65	37.49	NaN	NaN
1564	48.74	NaN	NaN	42.27	55.68	NaN	NaN
1565	25.66	NaN	NaN	21.02	30.76	NaN	NaN
1566	33.17	NaN	NaN	27.87	38.93	NaN	NaN
1567	29.23	NaN	NaN	24.27	34.66	NaN	NaN
1568	40.64	NaN	NaN	34.74	46.99	NaN	NaN
1569	13.25	NaN	NaN	9.99	16.98	NaN	NaN
1570	20.81	NaN	NaN	16.66	25.43	NaN	NaN
1571	10.59	NaN	NaN	7.70	13.95	NaN	NaN
1572	27.20	NaN	NaN	22.42	32.44	NaN	NaN
1573	36.01	NaN	NaN	30.47	42.00	NaN	NaN
1574	31.30	NaN	NaN	26.16	36.90	NaN	NaN
1575	22.87	NaN	NaN	18.51	27.70	NaN	NaN
1576	22.98	NaN	NaN	18.60	27.81	NaN	NaN
1577	45.18	NaN	NaN	38.95	51.86	NaN	NaN
1578	22.36	NaN	NaN	18.05	27.14	NaN	NaN
1579	7.22	NaN	NaN	4.87	10.04	NaN	NaN
1580	3.75	NaN	NaN	2.12	5.84	NaN	NaN
1581	43.47	NaN	NaN	37.36	50.03	NaN	NaN
1582	29.55	NaN	NaN	24.56	35.00	NaN	NaN
1583	44.30	NaN	NaN	38.14	50.92	NaN	NaN
1584	18.73	NaN	NaN	14.80	23.11	NaN	NaN
1585	26.11	NaN	NaN	21.43	31.25	NaN	NaN
1586	30.23	NaN	NaN	25.18	35.75	NaN	NaN
1587	40.89	NaN	NaN	34.98	47.27	NaN	NaN
1588	29.06	NaN	NaN	24.11	34.47	NaN	NaN
1589	36.06	NaN	NaN	30.53	42.06	NaN	NaN
1590	16.84	NaN	NaN	13.13	21.01	NaN	NaN
1591	29.97	NaN	NaN	24.94	35.46	NaN	NaN
1592	29.21	NaN	NaN	24.25	34.63	NaN	NaN
1593	23.49	NaN	NaN	19.06	28.37	NaN	NaN
1594	27.23	NaN	NaN	22.45	32.48	NaN	NaN
1595	14.61	NaN	NaN	11.17	18.51	NaN	NaN
1596	47.38	NaN	NaN	41.00	54.22	NaN	NaN
1597	32.19	NaN	NaN	26.97	37.87	NaN	NaN
1598	21.55	NaN	NaN	17.32	26.24	NaN	NaN
1599	40.66	NaN	NaN	34.77	47.02	NaN	NaN
1600	19.37	NaN	NaN	15.37	23.83	NaN	NaN
1601	42.76	NaN	NaN	36.71	49.28	NaN	NaN
1602	26.70	NaN	NaN	21.97	31.90	NaN	NaN
1603	33.16	NaN	NaN	27.86	38.92	NaN	NaN
1604	43.37	NaN	NaN	37.27	49.93	NaN	NaN
1605	33.25	NaN	NaN	27.94	39.02	NaN	NaN
1606	26.49	NaN	NaN	21.78	31.67	NaN	NaN
1607	14.22	NaN	NaN	10.83	18.08	NaN	NaN
1608	46.15	NaN	NaN	39.85	52.91	NaN	NaN
1609	29.13	NaN	NaN	24.17	34.54	NaN	NaN
1610	39.55	NaN	NaN	33.74	45.82	NaN	NaN
1611	40.62	NaN	NaN	34.72	46.97	NaN	NaN
1612	24.18	NaN	NaN	19.69	29.13	NaN	NaN
1613	17.01	NaN	NaN	13.27	21.20	NaN	NaN
1614	31.05	NaN	NaN	25.93	36.64	NaN	NaN
1615	27.71	NaN	NaN	22.89	33.00	NaN	NaN
1616	28.82	NaN	NaN	23.89	34.21	NaN	NaN
1617	47.53	NaN	NaN	41.14	54.38	NaN	NaN
1618	16.72	NaN	NaN	13.03	20.88	NaN	NaN
1619	22.43	NaN	NaN	18.11	27.21	NaN	NaN
1620	26.62	NaN	NaN	21.90	31.81	NaN	NaN
1621	32.95	NaN	NaN	27.67	38.70	NaN	NaN
1622	16.84	NaN	NaN	13.13	21.02	NaN	NaN
1623	45.18	NaN	NaN	38.96	51.87	NaN	NaN
1624	31.97	NaN	NaN	26.77	37.63	NaN	NaN
1625	43.10	NaN	NaN	37.03	49.64	NaN	NaN
1626	8.46	NaN	NaN	5.90	11.48	NaN	NaN
1627	29.21	NaN	NaN	24.25	34.63	NaN	NaN
1628	27.95	NaN	NaN	23.10	33.26	NaN	NaN
1629	24.75	NaN	NaN	20.20	29.76	NaN	NaN
1630	26.92	NaN	NaN	22.16	32.13	NaN	NaN
1631	15.02	NaN	NaN	11.53	18.97	NaN	NaN
1632	9.37	NaN	NaN	6.66	12.54	NaN	NaN
1633	34.96	NaN	NaN	29.51	40.87	NaN	NaN
1634	30.00	NaN	NaN	24.97	35.49	NaN	NaN
1635	33.63	NaN	NaN	28.29	39.43	NaN	NaN
1636	30.82	NaN	NaN	25.71	36.38	NaN	NaN
1637	22.40	NaN	NaN	18.09	27.18	NaN	NaN
1638	28.98	NaN	NaN	24.04	34.39	NaN	NaN
1639	17.49	NaN	NaN	13.70	21.74	NaN	NaN
1640	34.74	40.00	NaN	29.31	40.63	35.11	45.21
1641	34.92	38.73	NaN	29.48	40.83	33.92	43.86
1642	24.61	30.49	NaN	20.08	29.61	26.24	35.05
1643	23.57	22.47	NaN	19.13	28.46	18.84	26.41
1644	36.27	32.29	NaN	30.72	42.29	27.91	36.98
1645	23.04	21.30	NaN	18.66	27.88	17.77	25.14
1646	23.80	21.91	NaN	19.34	28.72	18.34	25.81
1647	22.68	23.72	NaN	18.34	27.49	19.99	27.76
1648	32.11	27.74	NaN	26.89	37.78	23.70	32.11
1649	31.67	39.66	NaN	26.50	37.31	34.79	44.84
1650	28.53	29.36	NaN	23.63	33.89	25.19	33.84
1651	26.01	31.78	NaN	21.34	31.14	27.44	36.44
1652	28.49	26.26	NaN	23.59	33.85	22.33	30.52
1653	6.15	14.60	NaN	3.99	8.76	11.71	17.81
1654	18.08	12.32	NaN	14.22	22.39	9.68	15.29
1655	4.37	11.40	NaN	2.59	6.61	8.86	14.26
1656	40.33	41.62	NaN	34.46	46.66	36.63	46.93
1657	14.84	20.00	NaN	11.37	18.77	16.59	23.73
1658	27.98	27.28	NaN	23.13	33.29	23.27	31.61
1659	22.33	20.32	NaN	18.02	27.10	16.88	24.08
1660	24.02	32.94	NaN	19.54	28.96	28.52	37.68
1661	41.90	40.55	NaN	35.91	48.35	35.63	45.79
1662	22.93	30.12	NaN	18.56	27.76	25.90	34.66
1663	23.22	26.81	NaN	18.82	28.08	22.83	31.10
1664	26.37	31.01	NaN	21.67	31.53	26.72	35.62
1665	31.43	25.97	NaN	26.27	37.04	22.06	30.20
1666	27.92	25.00	NaN	23.08	33.23	21.16	29.15
1667	14.07	11.12	NaN	10.70	17.91	8.62	13.95
1668	30.97	38.89	NaN	25.86	36.55	34.07	44.03
1669	17.06	15.39	NaN	13.33	21.26	12.42	18.68
1670	25.31	15.43	NaN	20.71	30.37	12.46	18.73
1671	33.33	35.96	NaN	28.02	39.11	31.33	40.91
1672	39.23	47.21	NaN	33.44	45.48	41.88	52.86
1673	31.99	26.49	NaN	26.79	37.66	22.54	30.76
1674	32.80	37.67	NaN	27.53	38.53	32.93	42.73
1675	29.96	29.80	NaN	24.93	35.45	25.60	34.32
1676	19.56	16.00	NaN	15.54	24.04	12.97	19.35
1677	32.06	29.49	NaN	26.85	37.72	25.31	33.98
1678	29.14	27.86	NaN	24.19	34.56	23.81	32.24
1679	27.23	31.16	NaN	22.45	32.48	26.86	35.77
1680	32.64	37.18	NaN	27.38	38.36	32.47	42.21
1681	18.72	27.61	NaN	14.80	23.11	23.57	31.96
1682	32.94	38.89	NaN	27.66	38.68	34.07	44.03
1683	45.70	37.09	NaN	39.44	52.43	32.39	42.11
1684	30.43	31.26	NaN	25.36	35.96	26.95	35.88
1685	31.46	31.16	NaN	26.30	37.08	26.87	35.78
1686	19.42	17.28	NaN	15.41	23.88	14.12	20.76
1687	32.42	33.91	NaN	27.18	38.12	29.42	38.72
1688	30.57	31.57	NaN	25.49	36.11	27.24	36.21
1689	33.06	29.22	NaN	27.76	38.81	25.07	33.70
1690	8.91	17.25	NaN	6.28	12.01	14.09	20.73
1691	18.68	12.45	NaN	14.76	23.06	9.79	15.42
1692	34.16	31.99	NaN	28.78	40.01	27.64	36.67
1693	36.27	31.82	NaN	30.71	42.28	27.47	36.48
1694	40.74	34.57	NaN	34.84	47.10	30.03	39.42
1695	18.70	24.05	NaN	14.77	23.08	20.29	28.12
1696	30.25	39.56	NaN	25.20	35.77	34.70	44.74
1697	38.38	42.48	NaN	32.66	44.56	37.43	47.84
1698	23.87	22.88	NaN	19.41	28.80	19.22	26.85
1699	24.72	29.38	NaN	20.17	29.72	25.21	33.87
1700	37.27	35.28	NaN	31.63	43.36	30.70	40.18
1701	34.90	26.18	NaN	29.46	40.81	22.25	30.42
1702	39.54	48.03	NaN	33.73	45.81	42.66	53.73
1703	12.27	15.10	NaN	9.14	15.87	12.16	18.36
1704	39.13	39.98	NaN	33.35	45.37	35.09	45.19
1705	30.81	28.14	NaN	25.71	36.38	24.07	32.54
1706	21.63	19.79	NaN	17.39	26.32	16.40	23.50
1707	15.83	26.61	NaN	12.24	19.88	22.65	30.89
1708	25.15	20.17	NaN	20.56	30.20	16.74	23.91
1709	43.21	40.56	NaN	37.12	49.75	35.63	45.80
1710	17.47	16.52	NaN	13.69	21.72	13.44	19.93
1711	26.75	31.41	NaN	22.01	31.95	27.09	36.04
1712	28.51	28.09	NaN	23.61	33.87	24.01	32.48
1713	35.25	30.34	NaN	29.78	41.18	26.10	34.89
1714	17.48	23.68	NaN	13.69	21.72	19.96	27.73
1715	21.91	29.24	NaN	17.64	26.63	25.08	33.71
1716	27.61	28.66	NaN	22.79	32.89	24.55	33.10
1717	30.88	29.80	NaN	25.77	36.45	25.60	34.31
1718	29.31	30.82	NaN	24.34	34.74	26.55	35.41
1719	28.68	23.74	NaN	23.77	34.06	20.01	27.79
1720	28.95	30.96	NaN	24.01	34.35	26.67	35.56
1721	20.26	15.06	NaN	16.17	24.82	12.12	18.32
1722	26.92	24.65	NaN	22.17	32.14	20.84	28.77
1723	24.83	35.87	NaN	20.27	29.85	31.25	40.81
1724	29.97	29.30	NaN	24.94	35.46	25.14	33.79
1725	38.82	39.89	NaN	33.06	45.03	35.00	45.09
1726	36.03	26.36	NaN	30.49	42.02	22.42	30.62
1727	40.79	43.35	NaN	34.88	47.15	38.25	48.77
1728	24.93	17.69	NaN	20.36	29.96	14.49	21.21
1729	8.72	9.62	NaN	6.12	11.79	7.30	12.25
1730	46.35	47.11	NaN	40.04	53.12	41.79	52.75
1731	22.25	26.51	NaN	17.95	27.02	22.56	30.78
1732	43.77	41.81	NaN	37.65	50.36	36.81	47.14
1733	21.77	14.40	NaN	17.52	26.49	11.53	17.59
1734	39.29	40.01	NaN	33.50	45.55	35.12	45.22
1735	14.69	14.56	NaN	11.24	18.61	11.67	17.77
1736	25.12	19.04	NaN	20.53	30.16	15.71	22.68
1737	25.75	22.33	NaN	21.10	30.85	18.72	26.26
1738	34.58	41.27	NaN	29.17	40.46	36.30	46.56
1739	17.60	26.15	NaN	13.80	21.86	22.22	30.39
1740	38.43	41.79	NaN	32.71	44.62	36.79	47.11
1741	35.14	29.26	NaN	29.67	41.06	25.10	33.74
1742	32.07	37.67	NaN	26.86	37.74	32.93	42.73
1743	39.28	33.04	NaN	33.49	45.53	28.61	37.79
1744	21.75	29.60	NaN	17.50	26.46	25.42	34.11
1745	47.16	45.98	NaN	40.79	53.98	40.72	51.55
1746	29.14	35.72	NaN	24.18	34.55	31.11	40.65
1747	45.64	42.08	NaN	39.38	52.36	37.06	47.42
1748	23.28	16.80	NaN	18.88	28.15	13.69	20.23
1749	28.27	29.43	NaN	23.40	33.61	25.25	33.92
1750	26.03	25.65	NaN	21.36	31.17	21.77	29.85
1751	33.15	27.81	NaN	27.85	38.91	23.76	32.18
1752	31.75	29.51	NaN	26.56	37.39	25.33	34.01
1753	18.19	26.51	NaN	14.32	22.52	22.56	30.78
1754	29.93	25.23	NaN	24.91	35.42	21.38	29.40
1755	21.66	23.61	NaN	17.42	26.36	19.89	27.65
1756	17.36	14.86	NaN	13.59	21.60	11.94	18.10
1757	23.29	22.38	NaN	18.89	28.16	18.76	26.32
1758	36.21	30.85	NaN	30.66	42.22	26.57	35.44
1759	21.60	27.21	NaN	17.37	26.30	23.20	31.53
1760	38.83	33.04	NaN	33.08	45.05	28.61	37.78
1761	43.59	35.39	NaN	37.48	50.17	30.80	40.30
1762	19.26	24.80	NaN	15.27	23.71	20.98	28.93
1763	30.64	31.85	NaN	25.56	36.19	27.50	36.51
1764	23.16	23.73	NaN	18.76	28.01	20.00	27.78
1765	14.75	11.65	NaN	11.29	18.67	9.09	14.54
1766	33.33	36.91	NaN	28.02	39.11	32.22	41.92
1767	37.31	35.42	NaN	31.68	43.41	30.83	40.33
1768	44.16	34.42	NaN	38.01	50.78	29.90	39.26
1769	36.68	33.60	NaN	31.09	42.73	29.13	38.39
1770	24.18	15.10	NaN	19.69	29.14	12.15	18.36
1771	36.09	33.91	NaN	30.55	42.09	29.42	38.72
1772	35.18	29.22	NaN	29.71	41.11	25.06	33.69
1773	34.81	29.36	NaN	29.37	40.71	25.19	33.85
1774	36.13	32.02	NaN	30.59	42.14	27.66	36.69
1775	26.60	32.14	NaN	21.88	31.79	27.77	36.82
1776	15.41	12.77	NaN	11.87	19.41	10.07	15.78
1777	9.61	10.63	NaN	6.87	12.82	8.19	13.39
1778	26.35	23.58	NaN	21.65	31.51	19.86	27.62
1779	34.84	32.47	NaN	29.40	40.74	28.08	37.18
1780	32.93	29.36	NaN	27.65	38.67	25.20	33.85
1781	33.64	29.83	NaN	28.30	39.45	25.63	34.35
1782	7.34	8.61	NaN	4.97	10.18	6.43	11.11
1783	18.54	13.33	NaN	14.63	22.90	10.57	16.40
1784	41.46	42.76	NaN	35.50	47.87	37.70	48.14
1785	36.53	41.74	NaN	30.95	42.57	36.74	47.05
1786	36.61	35.07	NaN	31.02	42.65	30.50	39.95
1787	25.53	33.26	NaN	20.91	30.62	28.81	38.02
1788	20.14	15.81	NaN	16.06	24.68	12.79	19.14
1789	37.26	43.32	NaN	31.63	43.35	38.23	48.74
1790	36.47	40.36	NaN	30.90	42.50	35.45	45.59
1791	35.65	32.71	NaN	30.15	41.62	28.31	37.44
1792	37.00	44.42	NaN	31.38	43.07	39.26	49.90
1793	16.77	25.00	NaN	13.06	20.93	21.17	29.15
1794	20.99	17.73	NaN	16.82	25.62	14.53	21.25
1795	4.73	6.83	NaN	2.87	7.05	4.90	9.08
1796	23.85	19.70	NaN	19.38	28.77	16.32	23.40
1797	42.57	36.54	NaN	36.53	49.07	31.87	41.52
1798	42.60	34.20	NaN	36.56	49.10	29.69	39.03
1799	42.38	42.16	NaN	36.35	48.86	37.14	47.51
1800	18.83	17.50	NaN	14.89	23.23	14.32	21.00
1801	35.00	44.50	NaN	29.55	40.91	39.34	49.99
1802	37.57	31.87	NaN	31.91	43.69	27.52	36.53
1803	34.90	25.30	NaN	29.46	40.81	21.44	29.47
1804	27.43	33.16	NaN	22.63	32.69	28.72	37.92
1805	32.88	29.85	NaN	27.60	38.62	25.64	34.37
1806	28.21	27.84	NaN	23.34	33.55	23.79	32.21
1807	22.37	22.39	NaN	18.06	27.14	18.77	26.33
1808	25.20	24.35	NaN	20.61	30.26	20.57	28.45
1809	34.32	24.87	NaN	28.93	40.18	21.05	29.01
1810	32.42	33.86	NaN	27.18	38.12	29.37	38.66
1811	40.39	39.95	NaN	34.51	46.72	35.06	45.15
1812	25.37	19.92	NaN	20.76	30.44	16.51	23.64
1813	26.47	29.14	NaN	21.76	31.64	24.99	33.61
1814	29.68	29.27	NaN	24.68	35.15	25.11	33.75
1815	27.88	26.93	NaN	23.04	33.18	22.94	31.23
1816	31.06	32.21	NaN	25.94	36.65	27.84	36.90
1817	32.58	32.54	NaN	27.32	38.29	28.14	37.25
1818	35.77	28.23	NaN	30.26	41.75	24.15	32.63
1819	27.95	35.83	NaN	23.10	33.26	31.21	40.77
1820	28.79	27.56	NaN	23.87	34.18	23.53	31.91
1821	28.09	33.35	NaN	23.23	33.41	28.90	38.12
1822	16.14	15.55	NaN	12.51	20.23	12.57	18.86
1823	21.47	21.57	NaN	17.25	26.15	18.02	25.43
1824	14.26	16.34	NaN	10.86	18.11	13.28	19.73
1825	48.12	53.03	NaN	41.69	55.01	47.38	59.00
1826	41.04	41.94	NaN	35.12	47.43	36.93	47.28
1827	28.81	25.15	NaN	23.89	34.20	21.30	29.31
1828	21.48	36.42	NaN	17.26	26.16	31.76	41.40
1829	10.44	5.63	NaN	7.57	13.77	3.89	7.68
1830	32.40	36.34	NaN	27.16	38.10	31.69	41.31
1831	26.42	23.19	NaN	21.72	31.59	19.50	27.19
1832	51.85	46.56	NaN	45.16	59.00	41.27	52.16
1833	18.28	26.25	NaN	14.40	22.62	22.32	30.50
1834	20.27	21.15	NaN	16.18	24.83	17.64	24.98
1835	28.44	28.28	NaN	23.55	33.79	24.19	32.68
1836	27.85	29.41	NaN	23.02	33.16	25.24	33.90
1837	22.23	24.00	NaN	17.93	26.99	20.25	28.07
1838	33.43	40.63	NaN	28.11	39.21	35.70	45.88
1839	31.16	25.45	NaN	26.03	36.75	21.58	29.64
1840	29.03	30.65	NaN	24.09	34.44	26.39	35.23
1841	12.16	7.95	NaN	9.04	15.74	5.85	10.36
1842	29.17	34.18	NaN	24.22	34.59	29.67	39.01
1843	13.11	10.87	NaN	9.86	16.82	8.40	13.66
1844	15.62	13.17	NaN	12.05	19.65	10.43	16.22
1845	25.71	27.15	NaN	21.07	30.81	23.15	31.47
1846	19.40	19.28	NaN	15.40	23.86	15.93	22.95
1847	29.24	34.43	NaN	24.27	34.66	29.91	39.28
1848	33.12	32.27	NaN	27.82	38.88	27.89	36.96
1849	24.66	26.22	NaN	20.12	29.66	22.29	30.47
1850	28.14	32.11	NaN	23.27	33.46	27.75	36.80
1851	20.58	21.32	NaN	16.46	25.17	17.80	25.17
1852	40.72	37.40	NaN	34.82	47.09	32.67	42.44
1853	43.09	44.86	NaN	37.01	49.63	39.67	50.37
1854	30.00	28.88	NaN	24.97	35.49	24.75	33.33
1855	30.03	30.68	NaN	25.00	35.53	26.42	35.27
1856	12.24	14.46	NaN	9.11	15.83	11.58	17.65
1857	27.97	23.68	NaN	23.12	33.28	19.95	27.72
1858	17.57	16.02	NaN	13.78	21.83	12.98	19.37
1859	30.09	25.34	NaN	25.05	35.59	21.48	29.52
1860	36.48	35.00	NaN	30.91	42.51	30.43	39.88
1861	31.41	32.86	NaN	26.26	37.03	28.44	37.59
1862	32.63	43.42	NaN	27.38	38.35	38.31	48.84
1863	31.26	23.47	NaN	26.12	36.86	19.76	27.50
1864	16.64	7.52	NaN	12.96	20.79	5.49	9.86
1865	21.53	25.19	NaN	17.30	26.22	21.35	29.36
1866	49.62	45.60	NaN	43.08	56.62	40.36	51.15
1867	42.10	37.86	NaN	36.10	48.57	33.11	42.94
1868	41.64	53.97	NaN	35.67	48.07	48.26	59.99
1869	18.99	25.65	NaN	15.03	23.40	21.76	29.85
1870	30.69	23.94	NaN	25.60	36.24	20.19	28.00
1871	16.66	19.61	NaN	12.97	20.82	16.23	23.30
1872	35.87	30.43	NaN	30.34	41.85	26.19	34.99
1873	28.91	25.05	NaN	23.98	34.31	21.22	29.21
1874	28.07	29.60	NaN	23.21	33.39	25.42	34.10
1875	25.95	24.36	NaN	21.29	31.08	20.58	28.46
1876	33.54	38.06	NaN	28.21	39.33	33.30	43.15
1877	27.53	13.20	NaN	22.72	32.81	10.46	16.26
1878	32.05	41.51	NaN	26.85	37.72	36.52	46.81
1879	28.57	24.72	NaN	23.67	33.94	20.91	28.85
1880	27.95	33.31	NaN	23.11	33.26	28.86	38.08
1881	42.07	36.15	NaN	36.07	48.53	31.51	41.12
1882	26.29	22.47	NaN	21.60	31.45	18.84	26.41
1883	23.80	19.94	NaN	19.35	28.72	16.54	23.67
1884	41.40	44.54	NaN	35.45	47.81	39.37	50.03
1885	37.76	29.91	NaN	32.08	43.89	25.70	34.44
1886	26.33	32.13	NaN	21.63	31.49	27.76	36.81
1887	26.25	25.13	NaN	21.56	31.40	21.29	29.30
1888	33.19	27.40	NaN	27.88	38.95	23.38	31.74
1889	29.54	26.41	NaN	24.55	34.99	22.47	30.67
1890	28.34	34.03	NaN	23.46	33.68	29.53	38.85
1891	39.93	38.15	NaN	34.09	46.23	33.38	43.24
1892	21.74	23.50	NaN	17.49	26.45	19.79	27.52
1893	40.17	37.01	NaN	34.31	46.49	32.32	42.03
1894	35.31	33.04	NaN	29.83	41.24	28.61	37.79
1895	30.20	31.24	NaN	25.15	35.71	26.94	35.87
1896	34.93	34.68	NaN	29.48	40.83	30.14	39.54
1897	39.44	30.26	NaN	33.64	45.71	26.03	34.81
1898	16.74	12.70	NaN	13.04	20.90	10.02	15.71
1899	20.53	24.73	NaN	16.41	25.11	20.92	28.87
1900	33.35	27.51	NaN	28.03	39.13	23.48	31.85
1901	39.98	39.45	NaN	34.14	46.29	34.59	44.62
1902	25.63	26.70	NaN	21.00	30.72	22.74	30.99
1903	29.26	25.53	NaN	24.29	34.68	21.65	29.72
1904	35.13	28.65	NaN	29.67	41.05	24.54	33.09
1905	33.97	32.09	NaN	28.60	39.79	27.73	36.78
1906	44.28	45.22	48.28	38.12	50.90	40.01	50.75
1907	40.58	47.17	56.15	34.69	46.93	41.84	52.81
1908	27.64	29.78	22.31	22.82	32.93	25.58	34.30
1909	25.12	31.74	48.91	20.53	30.16	27.41	36.40
1910	26.00	27.25	33.01	21.34	31.13	23.24	31.58
1911	39.13	35.30	46.70	33.35	45.37	30.71	40.20
1912	23.53	18.38	18.03	19.10	28.42	15.12	21.96
1913	24.99	19.79	19.55	20.42	30.02	16.40	23.50
1914	32.22	37.88	45.02	27.00	37.91	33.12	42.95
1915	30.61	38.91	37.33	25.52	36.15	34.09	44.05
1916	36.09	37.91	40.11	30.55	42.09	33.16	42.99
1917	24.85	26.78	29.50	20.29	29.87	22.81	31.07
1918	16.73	18.20	19.22	13.04	20.89	14.96	21.77
1919	27.15	27.13	24.36	22.38	32.39	23.13	31.45
1920	24.60	20.13	16.39	20.06	29.59	16.71	23.87
1921	34.28	34.34	36.63	28.89	40.14	29.82	39.18
1922	28.83	26.19	31.65	23.90	34.22	22.27	30.44
1923	30.41	31.31	23.09	25.34	35.93	27.00	35.93
1924	4.36	4.29	8.93	2.58	6.59	2.80	6.11
1925	37.61	33.24	26.52	31.95	43.74	28.79	38.00
1926	19.69	21.69	18.81	15.66	24.18	18.13	25.57
1927	32.13	31.05	37.41	26.92	37.81	26.76	35.66
1928	21.98	23.15	26.06	17.70	26.71	19.47	27.16
1929	16.43	15.87	13.86	12.77	20.56	12.85	19.21
1930	18.42	22.52	20.69	14.53	22.78	18.89	26.47
1931	15.81	11.49	9.57	12.22	19.86	8.94	14.35
1932	26.40	36.07	24.36	21.70	31.57	31.44	41.03
1933	20.51	19.70	15.15	16.39	25.09	16.32	23.41
1934	17.86	12.16	13.46	14.04	22.16	9.53	15.10
1935	28.29	31.31	28.37	23.41	33.63	27.00	35.93
1936	32.65	34.99	29.41	27.39	38.37	30.43	39.87
1937	28.85	36.22	24.50	23.92	34.24	31.58	41.19
1938	41.35	38.08	53.13	35.41	47.76	33.31	43.16
1939	17.49	14.09	13.67	13.70	21.73	11.25	17.25
1940	36.35	36.54	35.80	30.78	42.37	31.88	41.53
1941	30.60	45.34	43.18	25.51	36.14	40.12	50.87
1942	36.37	42.22	40.24	30.81	42.40	37.19	47.57
1943	33.69	33.59	35.04	28.34	39.49	29.12	38.37
1944	16.20	24.32	17.70	12.56	20.30	20.54	28.42
1945	29.50	28.57	26.72	24.51	34.95	24.47	33.00
1946	30.57	27.75	28.80	25.49	36.11	23.70	32.11
1947	20.60	20.29	17.03	16.47	25.19	16.85	24.04
1948	22.73	21.37	24.62	18.38	27.54	17.84	25.22
1949	17.08	20.55	19.44	13.34	21.29	17.09	24.33
1950	30.06	24.47	23.55	25.03	35.56	20.68	28.58
1951	33.21	27.92	37.25	27.91	38.98	23.86	32.30
1952	32.06	40.92	46.75	26.85	37.73	35.97	46.19
1953	25.03	35.37	30.15	20.45	30.06	30.78	40.27
1954	37.87	26.72	26.80	32.19	44.01	22.75	31.00
1955	10.03	17.51	17.86	7.22	13.31	14.33	21.01
1956	34.66	34.23	48.80	29.23	40.54	29.72	39.06
1957	31.64	29.19	23.66	26.47	37.27	25.04	33.67
1958	44.49	43.19	46.96	38.31	51.13	38.11	48.60
1959	12.24	16.38	18.54	9.11	15.83	13.30	19.77
1960	18.43	21.78	19.76	14.53	22.78	18.22	25.67
1961	16.57	12.80	17.36	12.89	20.71	10.11	15.82
1962	37.26	34.44	25.56	31.63	43.36	29.91	39.28
1963	44.32	39.11	36.05	38.15	50.94	34.28	44.27
1964	25.33	17.81	17.34	20.72	30.39	14.60	21.33
1965	37.47	39.27	41.65	31.82	43.58	34.43	44.43
1966	22.13	21.56	20.88	17.84	26.88	18.02	25.43
1967	38.30	36.75	41.99	32.58	44.47	32.07	41.75
1968	19.87	20.58	20.45	15.82	24.38	17.12	24.37
1969	52.89	48.35	48.44	46.13	60.11	42.96	54.06
1970	33.20	27.38	36.60	27.90	38.97	23.36	31.72
1971	28.76	30.68	33.90	23.84	34.15	26.41	35.26
1972	18.19	14.73	20.97	14.33	22.52	11.83	17.95
1973	26.30	30.84	32.71	21.61	31.46	26.56	35.43
1974	38.74	41.27	48.87	32.99	44.95	36.30	46.55
1975	27.22	24.96	31.34	22.44	32.46	21.13	29.11
1976	12.44	10.84	12.54	9.28	16.05	8.37	13.62
1977	22.21	11.71	7.61	17.91	26.97	9.13	14.60
1978	54.31	54.78	41.41	47.46	61.62	49.03	60.85
1979	24.87	30.65	22.68	20.31	29.90	26.39	35.23
1980	47.60	44.68	39.22	41.21	54.46	39.50	50.18
1981	26.52	24.82	17.66	21.80	31.70	21.00	28.95
1982	43.15	41.08	55.28	37.07	49.70	36.13	46.36
1983	45.29	51.58	64.99	39.05	51.98	46.01	57.47
1984	44.23	30.68	36.36	38.07	50.85	26.42	35.26
1985	26.19	24.89	18.06	21.50	31.34	21.06	29.03
1986	47.43	46.80	43.58	41.05	54.28	41.50	52.42
1987	16.37	11.70	14.00	12.71	20.48	9.13	14.59
1988	24.90	22.37	14.44	20.34	29.93	18.75	26.30
1989	19.35	19.45	22.67	15.35	23.80	16.09	23.13
1990	21.32	16.76	14.46	17.11	25.98	13.65	20.19
1991	25.17	28.46	14.36	20.58	30.21	24.36	32.88
1992	21.83	21.48	14.12	17.57	26.55	17.94	25.34
1993	41.46	49.30	37.73	35.51	47.88	43.85	55.06
1994	22.67	18.56	12.77	18.33	27.48	15.28	22.16
1995	39.97	51.86	57.81	34.12	46.27	46.27	57.77
1996	35.78	33.59	36.40	30.26	41.76	29.12	38.38
1997	33.40	26.98	43.09	28.08	39.18	22.99	31.29
1998	44.70	56.88	51.60	38.50	51.35	51.02	63.06
1999	26.98	29.98	33.43	22.22	32.20	25.77	34.51
2000	26.17	29.47	30.59	21.49	31.32	25.29	33.96
2001	15.06	16.22	16.02	11.56	19.02	13.17	19.60
2002	22.24	NaN	23.02	17.94	27.01	NaN	NaN
2003	24.67	NaN	29.83	20.13	29.67	NaN	NaN
2004	23.17	NaN	24.48	18.78	28.03	NaN	NaN
2005	45.72	NaN	34.24	39.45	52.45	NaN	NaN
2006	52.91	NaN	52.46	46.15	60.12	NaN	NaN
2007	12.60	NaN	15.78	9.42	16.24	NaN	NaN
2008	26.06	NaN	16.99	21.38	31.19	NaN	NaN
2009	NaN	NaN	22.15	NaN	NaN	NaN	NaN
2010	NaN	NaN	27.25	NaN	NaN	NaN	NaN
2011	NaN	NaN	44.65	NaN	NaN	NaN	NaN
2012	NaN	NaN	18.01	NaN	NaN	NaN	NaN
2013	NaN	NaN	18.80	NaN	NaN	NaN	NaN
2014	NaN	NaN	11.32	NaN	NaN	NaN	NaN
2015	NaN	NaN	13.16	NaN	NaN	NaN	NaN
2016	NaN	NaN	27.80	NaN	NaN	NaN	NaN
2017	NaN	NaN	64.96	NaN	NaN	NaN	NaN
2018	NaN	NaN	21.73	NaN	NaN	NaN	NaN
