# Supplementary material for: Supporting Restoration Decisions through Integration of Tree-Ring and Modeling Data: Reconstructing Flow and Salinity in the San Francisco Estuary over the Past Millennium
Source: Preprints.org preprint supplement (doi:10.20944/preprints202106.0122.v1), 2021-06-04
Supplement: Supplementary file 2 [file supplementary › Supplementary material/AppendixG.txt]

Table G1. Tab-separated residual site tree-ring chronologies. The 69 columns are in order as the sites are listed in
rows of the spreadsheet of metadata in Appendix A. Values are indices indicated growth relative to average (index of 1.0).
Time coverage varies by site. Values outside the time range of the chronology are filled with missing value code "NaN".
Year	1 B27	2 B32	3 BMC	4 KR2	5 DEN	6 DMS	7 KAW	8 SJR	9 CTN	10 CTS	11 EVG	12 GFE	13 GFN	14 GFS	15 KAI	16 LCM	17 LOB	18 LPK	19 LSC	20 MHC	21 PMN	22 RRT	23 SBP	24 CPE	25 UCJ	26 EPW	27 LVF	28 STA	29 UCP	30 ALU	31 BLU	32 DRU	33 FBK	34 HRK	35 LVU	36 LJK	37 LUP	38 LCU	39 PPB	40 AGK	41 AMC	42 CLK	43 DIB	44 DPR	45 DCP	46 FIG	47 FLK	48 HAS	49 MDI
899	NaN	NaN	0.9425	NaN	NaN	NaN	NaN	NaN	NaN	NaN	1.1012	0.8422	NaN	NaN	0.9466	NaN	NaN	1.0009	NaN	NaN	NaN	NaN	0.8055	0.9268	1.2250	0.8592	NaN	NaN	NaN	NaN	NaN	NaN	1.2487	NaN	NaN	NaN	NaN	NaN	NaN	1.0334	NaN	NaN	NaN	NaN	NaN	NaN	NaN	NaN	NaN
900	NaN	NaN	0.9344	NaN	NaN	NaN	NaN	NaN	NaN	NaN	0.8482	0.4789	NaN	NaN	1.0651	NaN	NaN	0.8059	NaN	NaN	NaN	NaN	1.3450	0.8687	0.8831	1.0189	NaN	NaN	NaN	NaN	NaN	NaN	0.9454	NaN	NaN	NaN	NaN	NaN	NaN	1.1058	NaN	NaN	NaN	NaN	NaN	NaN	NaN	NaN	NaN
901	NaN	NaN	1.0515	NaN	NaN	NaN	NaN	NaN	NaN	NaN	1.1661	0.8262	NaN	NaN	1.0480	NaN	NaN	1.1988	NaN	NaN	NaN	NaN	0.7346	0.9050	0.7907	0.9032	NaN	NaN	NaN	NaN	NaN	NaN	1.4246	1.0185	NaN	NaN	NaN	NaN	NaN	1.0221	NaN	NaN	NaN	NaN	NaN	NaN	NaN	NaN	NaN
902	NaN	NaN	0.9886	NaN	NaN	NaN	NaN	NaN	NaN	NaN	0.8344	0.9530	NaN	NaN	1.0439	NaN	NaN	0.7906	NaN	NaN	NaN	NaN	0.7983	1.1895	1.0463	1.0256	NaN	NaN	NaN	NaN	NaN	NaN	1.0859	1.0127	NaN	NaN	NaN	NaN	NaN	1.1592	NaN	NaN	NaN	NaN	NaN	NaN	NaN	NaN	NaN
903	NaN	NaN	1.1508	NaN	NaN	NaN	NaN	NaN	NaN	NaN	1.0371	1.1611	NaN	NaN	1.1997	NaN	NaN	1.0049	NaN	NaN	NaN	NaN	1.4529	1.1344	1.0921	0.9512	NaN	NaN	NaN	NaN	NaN	NaN	1.1397	1.1921	NaN	NaN	NaN	NaN	NaN	1.1061	NaN	NaN	NaN	NaN	NaN	NaN	NaN	NaN	NaN
904	NaN	NaN	0.9441	NaN	NaN	NaN	NaN	NaN	NaN	NaN	1.0174	1.2117	NaN	NaN	0.9962	NaN	NaN	1.0760	NaN	NaN	NaN	NaN	0.9814	0.9638	0.9818	0.9631	NaN	NaN	NaN	NaN	NaN	NaN	1.0590	1.0390	NaN	NaN	NaN	NaN	NaN	1.1316	NaN	NaN	NaN	NaN	NaN	NaN	NaN	NaN	NaN
905	NaN	NaN	0.9919	NaN	NaN	NaN	NaN	NaN	NaN	NaN	1.0096	1.0213	NaN	NaN	0.9994	NaN	NaN	1.1552	NaN	NaN	NaN	NaN	1.0071	1.0262	0.8219	0.9980	NaN	NaN	NaN	NaN	NaN	NaN	1.1683	1.1308	NaN	NaN	NaN	NaN	NaN	1.1552	NaN	NaN	NaN	NaN	NaN	NaN	NaN	NaN	NaN
906	NaN	NaN	0.9302	NaN	NaN	NaN	NaN	NaN	NaN	NaN	0.9917	0.8720	NaN	NaN	0.8841	NaN	NaN	0.9354	NaN	NaN	NaN	NaN	0.9022	0.8686	0.9399	1.0029	NaN	NaN	NaN	NaN	NaN	NaN	1.0948	0.9906	NaN	NaN	NaN	NaN	NaN	1.2220	NaN	NaN	NaN	NaN	NaN	NaN	NaN	NaN	NaN
907	NaN	NaN	0.9063	NaN	NaN	NaN	NaN	NaN	NaN	NaN	0.9245	1.0309	NaN	NaN	0.7792	NaN	NaN	0.9657	NaN	NaN	NaN	NaN	1.1358	1.0170	0.9329	0.9557	NaN	NaN	NaN	NaN	NaN	NaN	0.8296	0.9731	NaN	NaN	NaN	NaN	NaN	0.9416	NaN	NaN	NaN	NaN	NaN	NaN	NaN	NaN	NaN
908	NaN	NaN	0.9755	NaN	NaN	NaN	NaN	NaN	NaN	NaN	1.0399	1.2473	NaN	NaN	0.9469	NaN	NaN	0.9908	NaN	NaN	NaN	NaN	1.4307	1.0605	0.9018	1.0129	NaN	NaN	NaN	NaN	NaN	NaN	0.9463	0.7312	NaN	NaN	NaN	NaN	NaN	0.4791	NaN	NaN	NaN	NaN	NaN	NaN	NaN	NaN	NaN
909	NaN	NaN	0.9834	NaN	NaN	NaN	NaN	NaN	NaN	NaN	0.9683	0.9087	NaN	NaN	0.8659	NaN	NaN	1.2087	NaN	NaN	NaN	NaN	1.0336	0.9197	0.9568	0.9918	NaN	NaN	NaN	NaN	NaN	NaN	0.9603	1.1849	NaN	NaN	NaN	NaN	NaN	0.9897	NaN	NaN	NaN	NaN	NaN	NaN	NaN	NaN	NaN
910	NaN	NaN	0.9562	NaN	NaN	NaN	NaN	NaN	NaN	NaN	1.0708	0.9342	NaN	NaN	0.9296	NaN	NaN	0.9511	NaN	NaN	NaN	NaN	1.0198	1.2056	1.2612	1.2126	NaN	NaN	NaN	NaN	NaN	NaN	1.2460	1.1039	NaN	NaN	NaN	NaN	NaN	1.3687	NaN	NaN	NaN	NaN	NaN	NaN	NaN	NaN	NaN
911	NaN	NaN	1.0714	NaN	NaN	NaN	NaN	NaN	NaN	NaN	1.0165	0.8760	NaN	NaN	1.0427	NaN	NaN	1.1913	NaN	NaN	NaN	NaN	0.9195	1.0223	1.0137	1.2078	NaN	NaN	NaN	NaN	NaN	NaN	1.2085	1.0389	NaN	NaN	NaN	NaN	NaN	1.3677	NaN	NaN	NaN	NaN	NaN	NaN	NaN	NaN	NaN
912	NaN	NaN	1.0047	NaN	NaN	NaN	NaN	NaN	NaN	NaN	1.0563	0.9215	NaN	NaN	0.7459	NaN	NaN	0.9706	NaN	NaN	NaN	NaN	0.9082	1.0144	1.3092	0.9895	NaN	NaN	NaN	NaN	NaN	NaN	1.2113	1.1936	NaN	NaN	NaN	NaN	NaN	0.9495	NaN	NaN	NaN	NaN	NaN	NaN	NaN	NaN	NaN
913	NaN	NaN	0.9420	NaN	NaN	NaN	NaN	NaN	NaN	NaN	0.7572	0.9084	NaN	NaN	0.8905	NaN	NaN	0.8148	NaN	NaN	NaN	NaN	0.7726	1.0650	1.0337	0.8997	NaN	NaN	NaN	NaN	NaN	NaN	0.7370	0.8735	NaN	NaN	NaN	NaN	NaN	0.7367	NaN	NaN	NaN	NaN	NaN	NaN	NaN	NaN	NaN
914	NaN	NaN	1.0705	NaN	NaN	NaN	NaN	NaN	NaN	NaN	1.1668	0.8963	NaN	NaN	1.1248	NaN	NaN	1.0503	NaN	NaN	NaN	NaN	1.0027	0.8137	1.0225	1.0243	NaN	NaN	NaN	NaN	NaN	NaN	1.2142	1.1632	NaN	NaN	NaN	NaN	NaN	1.3982	NaN	NaN	NaN	NaN	NaN	NaN	NaN	NaN	NaN
915	NaN	NaN	0.9053	NaN	NaN	NaN	NaN	NaN	NaN	NaN	0.8878	1.1375	NaN	NaN	0.8404	NaN	NaN	1.2175	NaN	NaN	NaN	NaN	0.8011	0.9533	0.8212	0.9387	NaN	NaN	NaN	NaN	NaN	NaN	0.3592	0.6073	NaN	NaN	NaN	NaN	NaN	0.6051	NaN	NaN	NaN	NaN	NaN	NaN	NaN	NaN	NaN
916	NaN	NaN	1.0294	NaN	NaN	NaN	NaN	NaN	NaN	NaN	1.1843	1.0852	NaN	NaN	1.0229	NaN	NaN	0.9838	NaN	NaN	NaN	NaN	0.8219	1.1674	1.2364	1.2431	NaN	NaN	NaN	NaN	NaN	NaN	1.3293	1.3348	NaN	NaN	NaN	NaN	NaN	1.0120	NaN	NaN	NaN	NaN	NaN	NaN	NaN	NaN	NaN
917	NaN	NaN	1.0435	NaN	NaN	NaN	NaN	NaN	NaN	NaN	1.0562	0.9607	NaN	NaN	1.1771	NaN	NaN	1.1887	NaN	NaN	NaN	NaN	1.0745	1.1167	0.8840	1.1010	NaN	NaN	NaN	NaN	NaN	NaN	1.7054	1.0645	NaN	NaN	NaN	NaN	NaN	0.9612	NaN	NaN	NaN	NaN	NaN	NaN	NaN	NaN	NaN
918	NaN	NaN	0.8958	NaN	NaN	NaN	NaN	NaN	NaN	NaN	0.9504	1.0293	NaN	NaN	0.9098	NaN	NaN	0.8891	NaN	NaN	NaN	NaN	0.8285	0.8102	0.9118	0.9582	NaN	NaN	NaN	NaN	NaN	NaN	0.8810	0.9569	NaN	NaN	NaN	NaN	NaN	0.7762	NaN	NaN	NaN	NaN	NaN	NaN	NaN	NaN	NaN
919	NaN	NaN	0.9434	NaN	NaN	NaN	NaN	NaN	NaN	NaN	0.9678	0.8753	NaN	NaN	0.9625	NaN	NaN	1.0322	NaN	NaN	NaN	NaN	0.7993	0.8301	0.7984	0.8412	NaN	NaN	NaN	NaN	NaN	NaN	1.0803	1.0035	NaN	NaN	NaN	NaN	NaN	1.0317	NaN	NaN	NaN	NaN	NaN	NaN	NaN	NaN	NaN
920	NaN	NaN	1.0411	NaN	NaN	NaN	NaN	NaN	NaN	NaN	1.0498	1.0768	NaN	NaN	1.3649	NaN	NaN	0.6857	NaN	NaN	NaN	NaN	1.0012	1.2049	1.3145	1.0747	NaN	NaN	NaN	NaN	NaN	NaN	1.2716	1.2355	NaN	NaN	NaN	NaN	NaN	1.0790	NaN	NaN	NaN	NaN	NaN	NaN	NaN	NaN	NaN
921	NaN	NaN	0.9691	NaN	NaN	NaN	NaN	NaN	NaN	NaN	0.9056	1.0870	NaN	NaN	0.8496	NaN	NaN	1.1710	NaN	NaN	NaN	NaN	0.9055	0.8450	0.8248	0.9458	NaN	NaN	NaN	NaN	NaN	NaN	1.0342	0.9605	NaN	NaN	NaN	NaN	NaN	0.9288	NaN	NaN	NaN	NaN	NaN	NaN	NaN	NaN	NaN
922	NaN	NaN	1.1060	NaN	NaN	NaN	NaN	NaN	NaN	NaN	1.1214	1.0973	NaN	NaN	1.1793	NaN	NaN	0.6597	NaN	NaN	NaN	NaN	0.9573	1.1138	1.1839	1.1019	NaN	NaN	NaN	NaN	NaN	NaN	0.7081	0.8874	NaN	NaN	NaN	NaN	NaN	0.5290	NaN	NaN	NaN	NaN	NaN	NaN	NaN	NaN	NaN
923	NaN	NaN	0.8637	NaN	NaN	NaN	NaN	NaN	NaN	NaN	0.9099	1.0218	NaN	NaN	0.8348	NaN	NaN	0.7605	NaN	NaN	NaN	NaN	0.9663	1.0073	0.8733	0.8821	NaN	NaN	NaN	NaN	NaN	NaN	0.9549	0.8991	NaN	NaN	NaN	NaN	NaN	1.0538	NaN	NaN	NaN	NaN	NaN	NaN	NaN	NaN	NaN
924	NaN	NaN	0.7065	NaN	NaN	NaN	NaN	NaN	NaN	NaN	0.8266	0.6834	NaN	NaN	1.0933	NaN	NaN	0.6857	NaN	NaN	NaN	NaN	0.8121	0.7519	0.6854	0.9975	NaN	NaN	NaN	NaN	NaN	NaN	1.1862	1.0741	NaN	NaN	NaN	NaN	NaN	0.8727	NaN	NaN	NaN	NaN	NaN	NaN	NaN	NaN	NaN
925	NaN	NaN	1.0659	NaN	NaN	NaN	NaN	NaN	NaN	NaN	1.0606	1.1241	NaN	NaN	1.0235	NaN	NaN	1.2507	NaN	NaN	NaN	NaN	0.9915	1.0930	1.2036	0.9567	NaN	NaN	NaN	NaN	NaN	NaN	1.5437	1.2865	NaN	NaN	NaN	NaN	NaN	1.1688	NaN	NaN	NaN	NaN	NaN	NaN	NaN	NaN	NaN
926	NaN	NaN	1.0699	NaN	NaN	NaN	NaN	NaN	NaN	NaN	0.9631	0.9751	NaN	NaN	0.8952	NaN	NaN	1.1532	NaN	NaN	NaN	NaN	0.8547	0.9249	0.9497	0.9806	NaN	NaN	NaN	NaN	NaN	NaN	1.3961	1.3306	NaN	NaN	NaN	NaN	NaN	1.3755	NaN	NaN	NaN	NaN	NaN	NaN	NaN	NaN	NaN
927	NaN	NaN	1.0520	NaN	NaN	NaN	NaN	NaN	NaN	NaN	0.9966	0.8544	NaN	NaN	0.8121	NaN	NaN	1.1500	NaN	NaN	NaN	NaN	0.8900	0.8827	0.8270	1.0347	NaN	NaN	NaN	NaN	NaN	NaN	1.1327	0.9528	NaN	NaN	NaN	NaN	NaN	1.1929	NaN	NaN	NaN	NaN	NaN	NaN	NaN	NaN	NaN
928	NaN	NaN	1.0025	NaN	NaN	NaN	NaN	NaN	NaN	NaN	0.9012	0.9756	NaN	NaN	0.9086	NaN	NaN	1.0793	NaN	NaN	NaN	NaN	1.1352	0.7652	1.0005	0.8654	NaN	NaN	NaN	NaN	NaN	NaN	0.7135	0.8618	NaN	NaN	NaN	NaN	NaN	0.8565	NaN	NaN	NaN	NaN	NaN	NaN	NaN	NaN	NaN
929	NaN	NaN	0.8592	NaN	NaN	NaN	NaN	NaN	NaN	NaN	0.9506	1.0781	NaN	NaN	0.9873	NaN	NaN	1.2004	NaN	NaN	NaN	NaN	0.9954	1.2560	1.1992	1.2135	NaN	NaN	NaN	NaN	NaN	NaN	0.8586	1.1021	NaN	NaN	NaN	NaN	NaN	0.7019	NaN	NaN	NaN	NaN	NaN	NaN	NaN	NaN	NaN
930	NaN	NaN	0.8494	NaN	NaN	NaN	NaN	NaN	NaN	NaN	0.9155	1.1430	NaN	NaN	0.9824	NaN	NaN	0.8854	NaN	NaN	NaN	NaN	0.8775	0.9381	1.0071	1.0358	NaN	NaN	NaN	NaN	NaN	NaN	0.4880	0.7321	NaN	NaN	NaN	NaN	NaN	0.5906	NaN	NaN	NaN	NaN	NaN	NaN	NaN	NaN	NaN
931	NaN	NaN	1.0943	NaN	NaN	NaN	NaN	NaN	NaN	NaN	1.1336	0.8761	NaN	NaN	0.9124	NaN	NaN	1.0601	NaN	NaN	NaN	NaN	0.8537	1.0654	0.7023	1.0631	NaN	NaN	NaN	NaN	NaN	NaN	1.0975	0.9059	NaN	NaN	NaN	NaN	NaN	1.0769	NaN	NaN	NaN	NaN	NaN	NaN	NaN	NaN	NaN
932	NaN	NaN	0.9948	NaN	NaN	NaN	NaN	NaN	NaN	NaN	0.9644	0.9696	NaN	NaN	1.0415	NaN	NaN	0.9533	NaN	NaN	NaN	NaN	0.9099	0.9376	0.8550	0.8732	NaN	NaN	NaN	NaN	NaN	NaN	1.4535	0.9244	NaN	NaN	NaN	NaN	NaN	0.9333	NaN	NaN	NaN	NaN	NaN	NaN	NaN	NaN	NaN
933	NaN	NaN	0.9541	NaN	NaN	NaN	NaN	NaN	NaN	NaN	0.7935	1.0825	NaN	NaN	0.8658	NaN	NaN	1.0779	NaN	NaN	NaN	NaN	1.1159	0.9258	0.7682	0.9566	NaN	NaN	NaN	NaN	NaN	NaN	1.2692	0.9597	NaN	NaN	NaN	NaN	NaN	1.0060	NaN	NaN	NaN	NaN	NaN	NaN	NaN	NaN	NaN
934	NaN	NaN	1.1078	NaN	NaN	NaN	NaN	NaN	NaN	NaN	1.1233	1.2462	NaN	1.1182	1.0959	NaN	NaN	1.0520	NaN	NaN	NaN	NaN	0.8927	1.2278	1.2433	1.2139	NaN	NaN	NaN	NaN	NaN	NaN	1.2654	0.8506	NaN	NaN	NaN	NaN	NaN	1.0307	NaN	NaN	NaN	NaN	NaN	NaN	NaN	NaN	NaN
935	NaN	NaN	1.0357	NaN	NaN	NaN	NaN	NaN	NaN	NaN	0.9926	1.1164	NaN	1.0985	0.8513	NaN	NaN	0.9687	NaN	NaN	NaN	NaN	1.1436	0.9384	1.0182	0.8703	NaN	NaN	NaN	NaN	NaN	NaN	1.2732	1.1769	NaN	NaN	NaN	NaN	NaN	1.2282	NaN	NaN	NaN	NaN	NaN	NaN	NaN	NaN	NaN
936	NaN	NaN	0.9275	NaN	NaN	NaN	NaN	NaN	NaN	NaN	0.9519	0.9875	NaN	1.0795	0.7406	NaN	NaN	0.4544	NaN	NaN	NaN	NaN	1.0891	0.8950	0.9771	0.6079	NaN	NaN	NaN	NaN	NaN	NaN	1.4636	1.2937	NaN	NaN	NaN	NaN	NaN	0.9394	NaN	NaN	NaN	NaN	NaN	NaN	NaN	NaN	NaN
937	NaN	NaN	1.1051	NaN	NaN	NaN	NaN	NaN	NaN	NaN	1.1676	1.2364	NaN	1.1345	1.4091	NaN	NaN	1.4469	NaN	NaN	NaN	NaN	0.9743	1.4635	1.5745	1.2811	NaN	NaN	NaN	NaN	NaN	NaN	0.7981	1.0972	NaN	NaN	NaN	NaN	NaN	0.8872	NaN	NaN	NaN	NaN	NaN	NaN	NaN	NaN	NaN
938	NaN	NaN	0.9146	NaN	NaN	NaN	NaN	NaN	NaN	NaN	0.9684	0.9198	NaN	1.0154	0.8714	NaN	NaN	1.1499	NaN	NaN	NaN	NaN	0.8343	0.8229	0.9433	1.0247	NaN	NaN	NaN	NaN	NaN	NaN	1.2002	1.2287	NaN	NaN	NaN	NaN	NaN	0.7003	NaN	NaN	NaN	NaN	NaN	NaN	NaN	NaN	NaN
939	NaN	NaN	0.9688	NaN	NaN	NaN	NaN	NaN	NaN	NaN	1.0439	0.9813	NaN	1.0335	1.0179	NaN	NaN	1.0838	NaN	NaN	NaN	NaN	1.0914	0.8427	0.8771	1.0435	NaN	NaN	NaN	NaN	NaN	NaN	0.9176	0.8826	NaN	NaN	NaN	NaN	NaN	0.8457	NaN	NaN	NaN	NaN	NaN	NaN	NaN	NaN	NaN
940	NaN	NaN	1.0548	NaN	NaN	NaN	NaN	NaN	NaN	NaN	1.0125	0.9685	NaN	1.1074	1.0770	NaN	NaN	1.0264	NaN	NaN	NaN	NaN	1.4465	1.0163	1.1416	1.0792	NaN	NaN	NaN	NaN	NaN	NaN	1.2719	1.0796	NaN	NaN	NaN	NaN	NaN	1.0896	NaN	NaN	NaN	NaN	NaN	NaN	NaN	NaN	NaN
941	NaN	NaN	1.0264	NaN	NaN	NaN	NaN	NaN	NaN	NaN	0.9685	1.0761	NaN	1.1390	1.1963	NaN	NaN	1.2552	NaN	NaN	NaN	NaN	0.9320	1.1122	1.2046	1.2053	NaN	NaN	NaN	NaN	NaN	NaN	1.1809	1.0595	NaN	NaN	NaN	NaN	NaN	1.2616	NaN	NaN	NaN	NaN	NaN	NaN	NaN	NaN	NaN
942	NaN	NaN	0.9622	NaN	NaN	NaN	NaN	NaN	NaN	NaN	0.8928	1.0627	NaN	1.0604	0.9334	NaN	NaN	1.2829	NaN	NaN	NaN	NaN	1.0827	0.9480	0.8776	1.0144	NaN	NaN	NaN	NaN	NaN	NaN	0.7941	0.7740	NaN	NaN	NaN	NaN	NaN	0.9457	NaN	NaN	NaN	NaN	NaN	NaN	NaN	NaN	NaN
943	NaN	NaN	0.9301	NaN	NaN	NaN	NaN	NaN	1.1916	NaN	0.9239	1.2659	NaN	1.1886	1.0084	NaN	NaN	0.8245	NaN	NaN	NaN	NaN	1.0154	0.8861	0.9734	0.8474	NaN	NaN	NaN	NaN	NaN	NaN	0.8090	1.0825	NaN	NaN	NaN	NaN	NaN	1.0439	NaN	NaN	NaN	NaN	NaN	NaN	NaN	NaN	NaN
944	NaN	NaN	0.9484	NaN	NaN	NaN	NaN	NaN	0.9415	NaN	0.9667	1.1421	NaN	1.0693	1.1298	NaN	NaN	1.0034	NaN	NaN	NaN	NaN	0.8831	1.0559	1.0893	0.9812	NaN	NaN	NaN	NaN	NaN	NaN	1.1884	1.1593	NaN	NaN	NaN	NaN	NaN	1.1040	NaN	NaN	NaN	NaN	NaN	NaN	NaN	NaN	NaN
945	NaN	NaN	1.0037	NaN	NaN	NaN	NaN	NaN	1.1204	NaN	1.0852	1.0325	NaN	1.0223	1.0710	NaN	NaN	1.1026	NaN	NaN	NaN	NaN	1.1483	0.8674	0.9451	0.8748	NaN	NaN	NaN	NaN	NaN	NaN	0.6237	1.1800	NaN	NaN	NaN	NaN	NaN	0.8808	NaN	NaN	NaN	NaN	NaN	NaN	NaN	NaN	NaN
946	NaN	NaN	1.1271	NaN	NaN	NaN	NaN	NaN	1.1571	NaN	1.0835	0.9293	NaN	0.8739	1.0913	NaN	NaN	1.0747	NaN	NaN	NaN	NaN	1.3223	1.1266	0.9706	0.9480	NaN	NaN	NaN	NaN	NaN	NaN	1.0871	1.1150	NaN	NaN	NaN	NaN	NaN	0.8035	NaN	NaN	NaN	NaN	NaN	NaN	NaN	NaN	NaN
947	NaN	NaN	1.0570	NaN	NaN	NaN	NaN	NaN	1.0227	NaN	1.0847	0.8465	NaN	1.1036	1.0738	NaN	NaN	1.2002	NaN	NaN	NaN	NaN	1.2008	0.8420	0.9019	1.0157	NaN	NaN	NaN	NaN	NaN	NaN	0.6830	0.8289	NaN	NaN	NaN	NaN	NaN	0.7004	NaN	NaN	NaN	NaN	NaN	NaN	NaN	NaN	NaN
948	NaN	NaN	0.8190	NaN	NaN	NaN	NaN	NaN	0.9003	NaN	0.8358	1.0169	NaN	0.9702	0.7422	NaN	NaN	0.8983	NaN	NaN	NaN	NaN	1.2549	0.8782	0.9020	0.9667	NaN	NaN	NaN	NaN	NaN	NaN	1.0851	1.1789	NaN	NaN	NaN	NaN	NaN	0.9010	NaN	NaN	NaN	NaN	NaN	NaN	NaN	NaN	NaN
949	NaN	NaN	0.9571	NaN	NaN	NaN	NaN	NaN	1.0981	NaN	0.9602	1.2193	NaN	1.1233	0.9641	NaN	NaN	0.9443	NaN	NaN	NaN	NaN	1.0720	0.9980	1.0547	0.9485	NaN	NaN	NaN	NaN	NaN	NaN	0.9320	1.0386	NaN	NaN	NaN	NaN	NaN	0.8698	NaN	NaN	NaN	NaN	NaN	NaN	NaN	NaN	NaN
950	NaN	NaN	1.0541	NaN	NaN	NaN	NaN	NaN	0.7404	NaN	1.0211	1.1283	NaN	1.2485	1.1747	NaN	NaN	1.1406	NaN	NaN	NaN	NaN	1.1455	0.9594	0.8795	1.0431	NaN	NaN	NaN	NaN	NaN	NaN	0.9188	1.0002	NaN	NaN	NaN	NaN	NaN	1.0443	NaN	NaN	NaN	NaN	NaN	NaN	NaN	NaN	NaN
951	NaN	NaN	1.0357	NaN	NaN	NaN	NaN	NaN	1.3406	NaN	1.0081	1.3228	NaN	1.3958	1.2095	NaN	NaN	0.9336	NaN	NaN	NaN	NaN	0.8184	1.2843	1.1309	1.2529	NaN	NaN	NaN	NaN	NaN	NaN	1.4073	1.0748	NaN	NaN	NaN	NaN	NaN	1.1131	NaN	NaN	NaN	NaN	NaN	NaN	NaN	NaN	NaN
952	NaN	NaN	0.9281	NaN	NaN	NaN	NaN	NaN	0.8855	NaN	0.9606	0.9672	NaN	0.9382	0.6782	NaN	NaN	0.8953	NaN	NaN	NaN	NaN	1.2365	0.8230	0.8663	1.0304	NaN	NaN	NaN	NaN	NaN	NaN	0.7828	0.9320	NaN	NaN	NaN	NaN	NaN	0.8041	NaN	NaN	NaN	NaN	NaN	NaN	NaN	NaN	NaN
953	NaN	NaN	0.9319	NaN	NaN	NaN	NaN	NaN	1.1310	NaN	0.9935	1.0634	NaN	1.1680	0.8696	NaN	NaN	1.1273	NaN	NaN	NaN	NaN	1.2673	1.2723	1.1156	1.1741	NaN	NaN	NaN	NaN	NaN	NaN	0.9461	0.8129	NaN	NaN	NaN	NaN	NaN	0.8392	NaN	NaN	NaN	NaN	NaN	NaN	NaN	NaN	NaN
954	NaN	NaN	0.7050	NaN	NaN	NaN	NaN	NaN	1.0045	NaN	0.4882	0.9942	NaN	1.0071	0.8363	NaN	NaN	0.8208	NaN	NaN	NaN	NaN	1.0870	1.0125	0.7311	0.7843	NaN	NaN	NaN	NaN	NaN	NaN	0.6191	0.8277	NaN	NaN	NaN	NaN	NaN	0.5811	NaN	NaN	NaN	NaN	NaN	NaN	NaN	NaN	NaN
955	NaN	NaN	1.1145	NaN	NaN	NaN	NaN	NaN	1.0213	NaN	1.1760	0.8288	NaN	1.0583	1.1671	NaN	NaN	1.1341	NaN	NaN	NaN	NaN	0.7755	0.9359	1.0186	1.0237	NaN	NaN	NaN	NaN	NaN	NaN	1.2928	0.9764	NaN	NaN	NaN	NaN	NaN	1.0923	NaN	NaN	NaN	NaN	NaN	NaN	NaN	NaN	NaN
956	NaN	NaN	1.1258	NaN	NaN	NaN	NaN	NaN	0.8402	NaN	1.1848	0.9622	NaN	1.0252	0.9153	NaN	NaN	0.9828	NaN	NaN	NaN	NaN	1.0756	0.9492	0.9662	0.9876	NaN	NaN	NaN	NaN	NaN	NaN	1.3842	1.0342	NaN	NaN	NaN	NaN	NaN	1.1152	NaN	NaN	NaN	NaN	NaN	NaN	NaN	NaN	NaN
957	NaN	NaN	0.8027	NaN	NaN	NaN	NaN	NaN	0.4986	NaN	0.8440	0.6933	NaN	0.8086	0.7338	NaN	NaN	0.7264	NaN	NaN	NaN	NaN	0.8547	1.0173	0.7554	0.9171	NaN	NaN	NaN	NaN	NaN	NaN	0.5140	0.7489	NaN	NaN	NaN	NaN	NaN	0.5946	NaN	NaN	NaN	NaN	NaN	NaN	NaN	NaN	NaN
958	NaN	NaN	1.0798	NaN	NaN	NaN	NaN	NaN	0.8537	NaN	1.1183	0.9592	NaN	0.9750	1.0109	NaN	NaN	1.1748	NaN	NaN	NaN	NaN	1.3390	0.9594	1.3021	0.9967	NaN	NaN	NaN	NaN	NaN	NaN	1.0110	1.1539	NaN	NaN	NaN	NaN	NaN	0.7814	NaN	NaN	NaN	NaN	NaN	NaN	NaN	NaN	NaN
959	NaN	NaN	1.0374	NaN	NaN	NaN	NaN	NaN	1.0209	NaN	1.1052	1.0793	NaN	1.1421	0.9395	NaN	NaN	1.0897	NaN	NaN	NaN	NaN	1.1806	0.8589	0.8382	0.8835	NaN	NaN	NaN	NaN	NaN	NaN	0.9361	0.9678	NaN	NaN	NaN	NaN	NaN	1.1113	NaN	NaN	NaN	NaN	NaN	NaN	NaN	NaN	NaN
960	NaN	NaN	1.1119	NaN	NaN	NaN	NaN	NaN	0.7788	NaN	1.1334	1.0794	NaN	1.1215	1.0126	NaN	NaN	1.0838	NaN	NaN	NaN	NaN	1.2195	1.0541	1.0020	0.9737	NaN	NaN	NaN	NaN	NaN	NaN	1.1881	1.0137	NaN	NaN	NaN	NaN	NaN	1.2250	NaN	NaN	NaN	NaN	NaN	NaN	NaN	NaN	NaN
961	NaN	NaN	0.8566	NaN	NaN	NaN	NaN	NaN	0.7248	NaN	0.7247	0.9393	NaN	1.1054	0.8926	NaN	NaN	0.7916	NaN	NaN	NaN	NaN	1.0823	0.7752	0.7597	0.6714	NaN	NaN	NaN	NaN	NaN	NaN	0.9217	1.0303	NaN	NaN	NaN	NaN	NaN	0.8581	NaN	NaN	NaN	NaN	NaN	NaN	NaN	NaN	NaN
962	NaN	NaN	0.9336	NaN	NaN	NaN	NaN	NaN	0.9572	NaN	0.8971	1.1004	NaN	1.0671	0.9059	NaN	NaN	1.2455	NaN	NaN	NaN	NaN	1.5630	0.7555	0.8452	0.8480	NaN	NaN	NaN	NaN	NaN	NaN	0.8624	0.9157	NaN	NaN	NaN	NaN	NaN	0.7553	NaN	NaN	NaN	NaN	NaN	NaN	NaN	NaN	NaN
963	NaN	NaN	1.0707	NaN	NaN	NaN	NaN	NaN	1.3266	NaN	1.1353	1.2100	NaN	1.3237	0.9744	NaN	NaN	1.0966	NaN	NaN	NaN	NaN	0.8679	1.3154	1.2577	1.1915	NaN	NaN	NaN	NaN	NaN	NaN	0.7810	0.7735	NaN	NaN	NaN	NaN	NaN	0.6195	NaN	NaN	NaN	NaN	NaN	NaN	NaN	NaN	NaN
964	NaN	NaN	1.0113	NaN	NaN	NaN	NaN	NaN	0.9810	NaN	1.0663	1.0262	NaN	1.0811	0.8860	NaN	NaN	1.0592	NaN	NaN	NaN	NaN	1.0800	0.9588	1.2086	1.1531	NaN	NaN	NaN	NaN	NaN	NaN	0.7801	0.8337	NaN	NaN	NaN	NaN	NaN	0.9112	NaN	NaN	NaN	NaN	NaN	NaN	NaN	NaN	NaN
965	NaN	NaN	0.9436	NaN	NaN	NaN	NaN	NaN	1.1155	NaN	1.1313	1.0979	NaN	1.0695	1.1443	NaN	NaN	1.0837	NaN	NaN	NaN	NaN	1.3639	1.3295	1.4582	1.0861	NaN	NaN	NaN	NaN	NaN	NaN	1.1864	0.8911	NaN	NaN	NaN	NaN	NaN	0.7024	NaN	NaN	NaN	NaN	NaN	NaN	NaN	NaN	NaN
966	NaN	NaN	0.9527	NaN	NaN	NaN	NaN	NaN	1.0801	NaN	0.9440	1.0291	NaN	0.9980	0.9587	NaN	NaN	1.0883	NaN	NaN	NaN	NaN	1.2739	0.9563	0.7494	0.8711	NaN	NaN	NaN	NaN	NaN	NaN	1.1557	0.9865	NaN	NaN	NaN	NaN	NaN	1.0002	NaN	NaN	NaN	NaN	NaN	NaN	NaN	NaN	NaN
967	NaN	NaN	1.0602	NaN	NaN	NaN	NaN	NaN	0.8330	NaN	1.0977	0.9059	NaN	1.0618	1.0884	NaN	NaN	0.8544	NaN	NaN	NaN	NaN	1.2368	1.0043	1.0247	0.9827	NaN	NaN	NaN	NaN	NaN	NaN	1.1051	0.9248	NaN	NaN	NaN	NaN	NaN	0.7520	NaN	NaN	NaN	NaN	NaN	NaN	NaN	NaN	NaN
968	NaN	NaN	1.0037	NaN	NaN	NaN	NaN	NaN	1.1010	NaN	1.0720	1.1478	NaN	1.0733	1.1200	NaN	NaN	0.8526	NaN	NaN	NaN	NaN	1.1101	1.1578	1.4269	1.0567	NaN	NaN	NaN	NaN	NaN	NaN	1.4732	1.0531	NaN	NaN	NaN	NaN	NaN	1.4209	NaN	NaN	NaN	NaN	NaN	NaN	NaN	NaN	NaN
969	NaN	NaN	0.9732	NaN	NaN	NaN	NaN	NaN	0.7857	NaN	0.9412	0.7512	NaN	0.8308	0.7351	NaN	NaN	0.9420	NaN	NaN	NaN	NaN	1.5912	0.7037	0.6626	0.9072	NaN	NaN	NaN	NaN	NaN	NaN	0.9444	1.0574	NaN	NaN	NaN	NaN	NaN	0.9508	NaN	NaN	NaN	NaN	NaN	NaN	NaN	NaN	NaN
970	NaN	NaN	1.0681	NaN	NaN	NaN	NaN	NaN	1.1858	NaN	1.1733	1.0557	NaN	0.8719	1.0217	NaN	NaN	1.2101	NaN	NaN	NaN	NaN	0.9086	1.1031	1.4366	1.0129	NaN	NaN	NaN	NaN	NaN	NaN	1.3042	1.0811	NaN	NaN	NaN	NaN	NaN	1.4938	NaN	NaN	NaN	NaN	NaN	NaN	NaN	NaN	NaN
971	NaN	NaN	0.9157	NaN	NaN	NaN	NaN	NaN	0.7970	NaN	0.8600	0.8967	NaN	1.0227	1.0200	NaN	NaN	1.0940	NaN	NaN	NaN	NaN	0.9382	0.8511	0.6800	0.7614	NaN	NaN	NaN	NaN	NaN	NaN	0.9373	1.1894	NaN	NaN	NaN	NaN	NaN	1.0562	NaN	NaN	NaN	NaN	NaN	NaN	NaN	NaN	NaN
972	NaN	NaN	0.9127	NaN	NaN	NaN	NaN	NaN	0.8490	NaN	1.0033	1.1121	NaN	0.9536	1.1367	NaN	NaN	0.8731	NaN	NaN	NaN	NaN	0.8791	1.0588	0.9299	0.9658	NaN	NaN	NaN	NaN	NaN	NaN	1.2965	1.1276	NaN	NaN	NaN	NaN	NaN	1.2567	NaN	NaN	NaN	NaN	NaN	NaN	NaN	NaN	NaN
973	NaN	NaN	0.9783	NaN	NaN	NaN	NaN	NaN	1.2558	NaN	1.0536	1.1719	NaN	1.1184	1.1795	NaN	NaN	1.2801	NaN	NaN	NaN	NaN	1.0116	0.9342	1.0522	1.0490	NaN	NaN	NaN	NaN	NaN	NaN	0.8409	1.0867	NaN	NaN	NaN	NaN	NaN	1.1608	NaN	NaN	NaN	NaN	NaN	NaN	NaN	NaN	NaN
974	NaN	NaN	1.0263	NaN	NaN	NaN	NaN	NaN	0.8863	NaN	1.0145	0.9894	NaN	0.9815	1.1180	NaN	NaN	0.9411	NaN	NaN	NaN	NaN	1.0800	1.1767	1.4252	1.0333	NaN	NaN	NaN	NaN	NaN	NaN	1.2001	1.3342	NaN	NaN	NaN	NaN	NaN	1.5546	NaN	NaN	NaN	NaN	NaN	NaN	NaN	NaN	NaN
975	NaN	NaN	0.8556	NaN	NaN	NaN	NaN	NaN	0.8284	NaN	0.8941	0.9660	NaN	0.9133	1.0225	NaN	NaN	0.8945	NaN	NaN	NaN	NaN	0.8702	0.9526	0.8339	1.0716	NaN	NaN	NaN	NaN	NaN	NaN	1.0301	1.2972	NaN	NaN	NaN	NaN	NaN	0.8660	NaN	NaN	NaN	NaN	NaN	NaN	NaN	NaN	NaN
976	NaN	NaN	0.9706	NaN	NaN	NaN	NaN	NaN	1.1855	NaN	1.0161	0.9735	NaN	1.0456	1.0045	NaN	NaN	0.9328	NaN	NaN	NaN	NaN	0.8388	1.0961	1.1709	0.9560	NaN	NaN	NaN	NaN	NaN	NaN	0.8761	1.0169	NaN	NaN	NaN	NaN	NaN	1.1448	NaN	NaN	NaN	NaN	NaN	NaN	NaN	NaN	NaN
977	NaN	NaN	0.9954	NaN	NaN	NaN	NaN	NaN	1.1067	NaN	0.9832	1.0324	NaN	0.9317	1.0498	NaN	NaN	1.1123	NaN	NaN	NaN	NaN	1.2248	0.9621	0.9039	0.8590	NaN	NaN	NaN	NaN	NaN	NaN	0.8502	0.7538	NaN	NaN	NaN	NaN	NaN	0.9389	NaN	NaN	NaN	NaN	NaN	NaN	NaN	NaN	NaN
978	NaN	NaN	0.8715	NaN	NaN	NaN	NaN	NaN	0.7967	NaN	0.9201	1.0818	NaN	1.0535	1.0071	NaN	NaN	0.8786	NaN	NaN	NaN	NaN	1.0279	1.1339	0.9705	0.8981	NaN	NaN	NaN	NaN	NaN	NaN	0.8652	0.7974	NaN	NaN	NaN	NaN	NaN	0.5650	NaN	NaN	NaN	NaN	NaN	NaN	NaN	NaN	NaN
979	NaN	NaN	0.8138	NaN	NaN	NaN	NaN	NaN	0.7616	NaN	0.7884	0.7660	NaN	0.8959	0.9429	NaN	NaN	0.4417	NaN	NaN	NaN	NaN	1.0166	0.7863	0.8500	0.9640	NaN	NaN	NaN	NaN	NaN	NaN	0.6276	0.8017	NaN	NaN	NaN	NaN	NaN	0.5704	NaN	NaN	NaN	NaN	NaN	NaN	NaN	NaN	NaN
980	NaN	NaN	0.8544	NaN	NaN	NaN	NaN	NaN	1.3087	NaN	0.7801	1.0823	NaN	1.0959	1.0213	NaN	NaN	0.7165	NaN	NaN	NaN	NaN	0.9632	0.9485	1.1340	0.9847	NaN	NaN	NaN	NaN	NaN	NaN	1.0047	1.0209	NaN	NaN	NaN	NaN	NaN	1.2805	NaN	NaN	NaN	NaN	NaN	NaN	NaN	NaN	NaN
981	NaN	NaN	0.9946	NaN	NaN	NaN	NaN	NaN	0.3606	NaN	1.0589	0.6239	NaN	0.8677	0.9156	NaN	NaN	0.6079	NaN	NaN	NaN	NaN	1.1476	0.9143	1.0115	0.8492	NaN	NaN	NaN	NaN	NaN	NaN	0.9436	1.0938	NaN	NaN	NaN	NaN	NaN	0.8413	NaN	NaN	NaN	NaN	NaN	NaN	NaN	NaN	NaN
982	NaN	NaN	1.0522	NaN	NaN	NaN	NaN	NaN	1.1264	NaN	1.1106	1.0547	NaN	1.1154	1.0626	NaN	NaN	1.4218	NaN	NaN	NaN	NaN	0.7474	1.0605	0.7902	0.7785	NaN	NaN	NaN	NaN	NaN	NaN	1.3578	1.0364	NaN	NaN	NaN	NaN	NaN	0.9843	NaN	NaN	NaN	NaN	NaN	NaN	NaN	NaN	NaN
983	NaN	NaN	1.0266	NaN	NaN	NaN	NaN	NaN	0.7066	NaN	1.1039	0.8409	NaN	0.7667	0.8602	NaN	NaN	1.0018	NaN	NaN	NaN	NaN	0.9617	0.8953	0.6587	0.9350	NaN	NaN	NaN	NaN	NaN	NaN	0.6132	0.8008	NaN	NaN	NaN	NaN	NaN	0.6274	NaN	NaN	NaN	NaN	NaN	NaN	NaN	NaN	NaN
984	NaN	NaN	0.9922	NaN	NaN	NaN	NaN	NaN	0.8228	NaN	1.2203	1.0953	NaN	1.1677	1.0213	NaN	NaN	1.0155	NaN	NaN	NaN	NaN	1.0355	1.0423	1.1269	1.1135	NaN	NaN	NaN	NaN	NaN	NaN	0.9200	0.8090	NaN	NaN	NaN	NaN	NaN	0.8867	NaN	NaN	NaN	NaN	NaN	NaN	NaN	NaN	NaN
985	NaN	NaN	1.1346	NaN	NaN	NaN	NaN	NaN	0.8793	NaN	1.1908	0.9875	NaN	1.0898	0.9637	NaN	NaN	0.9802	NaN	NaN	NaN	NaN	0.9698	1.1230	1.2331	1.1964	NaN	NaN	NaN	NaN	NaN	NaN	1.2281	0.9921	NaN	NaN	NaN	NaN	NaN	1.1024	NaN	NaN	NaN	NaN	NaN	NaN	NaN	NaN	NaN
986	NaN	NaN	0.9320	NaN	NaN	NaN	NaN	NaN	0.9743	NaN	0.8821	0.9550	NaN	1.0160	0.8580	NaN	NaN	0.8767	NaN	NaN	NaN	NaN	1.0467	1.1901	1.4268	1.1309	NaN	NaN	NaN	NaN	NaN	NaN	0.4944	0.6991	NaN	NaN	NaN	NaN	NaN	0.5832	NaN	NaN	NaN	NaN	NaN	NaN	NaN	NaN	NaN
987	NaN	NaN	1.0988	NaN	NaN	NaN	NaN	NaN	1.1537	NaN	0.9957	1.1279	NaN	1.0539	1.2649	NaN	NaN	1.0304	NaN	NaN	NaN	NaN	0.8679	0.8303	0.8921	1.0861	NaN	NaN	NaN	NaN	NaN	NaN	1.0797	1.0219	NaN	NaN	NaN	NaN	NaN	1.1002	NaN	NaN	NaN	NaN	NaN	NaN	NaN	NaN	NaN
988	NaN	NaN	1.0109	NaN	NaN	NaN	NaN	NaN	1.0193	NaN	0.9803	0.9357	NaN	1.0972	1.1832	NaN	NaN	1.1842	NaN	NaN	NaN	NaN	1.0867	1.2275	1.2442	1.2103	NaN	NaN	NaN	NaN	NaN	NaN	1.2943	1.1008	NaN	NaN	NaN	NaN	NaN	1.3694	NaN	NaN	NaN	NaN	NaN	NaN	NaN	NaN	NaN
989	NaN	NaN	1.1114	NaN	NaN	NaN	NaN	NaN	1.2176	NaN	1.1093	0.9865	NaN	1.1204	1.1348	NaN	NaN	1.1172	NaN	NaN	NaN	NaN	0.9788	1.1479	1.0240	0.9481	NaN	NaN	NaN	NaN	NaN	NaN	0.6033	0.8260	NaN	NaN	NaN	NaN	NaN	0.6178	NaN	NaN	NaN	NaN	NaN	NaN	NaN	NaN	NaN
990	NaN	NaN	0.9828	NaN	NaN	NaN	NaN	NaN	0.8575	NaN	1.0103	0.9103	NaN	0.9638	0.7163	NaN	NaN	0.9105	NaN	NaN	NaN	NaN	0.9994	0.8317	0.8500	0.8555	NaN	NaN	NaN	NaN	NaN	NaN	0.8333	0.6921	NaN	NaN	NaN	NaN	NaN	1.0965	NaN	NaN	NaN	NaN	NaN	NaN	NaN	NaN	NaN
991	NaN	NaN	1.1566	NaN	NaN	NaN	NaN	NaN	1.2109	NaN	1.1170	1.1539	NaN	1.0988	0.8959	NaN	NaN	1.0223	NaN	NaN	NaN	NaN	0.9349	0.9964	1.0363	1.0097	NaN	NaN	NaN	NaN	NaN	NaN	1.0574	1.2025	NaN	NaN	NaN	NaN	NaN	1.0370	NaN	NaN	NaN	NaN	NaN	NaN	NaN	NaN	NaN
992	NaN	NaN	0.9712	NaN	NaN	NaN	NaN	NaN	1.0123	NaN	1.0414	1.0379	NaN	1.0275	0.9852	NaN	NaN	1.0193	NaN	NaN	NaN	NaN	1.3299	1.0385	1.0849	1.0305	NaN	NaN	NaN	NaN	NaN	NaN	0.9827	0.7610	NaN	NaN	NaN	NaN	NaN	1.2889	NaN	NaN	NaN	NaN	NaN	NaN	NaN	NaN	NaN
993	NaN	NaN	0.9556	NaN	NaN	NaN	NaN	NaN	1.4129	NaN	1.0847	1.1052	NaN	0.9920	1.2513	NaN	NaN	1.0145	NaN	NaN	NaN	NaN	0.8815	1.2436	1.3222	1.0717	NaN	NaN	NaN	NaN	NaN	NaN	1.2670	1.3143	NaN	NaN	NaN	NaN	NaN	1.2684	NaN	NaN	NaN	NaN	NaN	NaN	NaN	NaN	NaN
994	NaN	NaN	0.8417	NaN	NaN	NaN	NaN	NaN	0.9830	NaN	0.9583	0.9165	NaN	1.0491	0.7313	NaN	NaN	0.9013	NaN	NaN	NaN	NaN	1.0684	0.7251	0.8109	0.7665	NaN	NaN	NaN	NaN	NaN	NaN	1.1178	1.2374	NaN	NaN	NaN	NaN	NaN	0.9886	NaN	NaN	NaN	NaN	NaN	NaN	NaN	NaN	NaN
995	NaN	NaN	0.9753	NaN	NaN	NaN	NaN	NaN	0.8319	NaN	0.9415	0.8421	NaN	0.8976	0.7626	NaN	NaN	0.5376	NaN	NaN	NaN	NaN	0.9277	0.8874	0.9514	0.9119	NaN	NaN	NaN	NaN	NaN	NaN	0.7174	0.9076	NaN	NaN	NaN	NaN	NaN	0.8433	NaN	NaN	NaN	NaN	NaN	NaN	NaN	NaN	NaN
996	NaN	NaN	1.0694	NaN	NaN	NaN	NaN	NaN	1.1304	NaN	0.9616	0.9286	NaN	0.8587	0.8944	NaN	NaN	1.2858	NaN	NaN	NaN	NaN	0.8400	0.9036	0.7045	0.8811	NaN	NaN	NaN	NaN	NaN	NaN	0.7622	0.7642	NaN	NaN	NaN	NaN	NaN	1.1865	NaN	NaN	NaN	NaN	NaN	NaN	NaN	NaN	NaN
997	NaN	NaN	1.1703	NaN	NaN	NaN	NaN	NaN	1.0113	NaN	1.2497	0.9665	NaN	1.0504	1.0572	NaN	NaN	0.8815	NaN	NaN	NaN	NaN	0.9388	0.9889	1.1644	1.0479	NaN	NaN	NaN	NaN	NaN	NaN	1.1093	1.1691	NaN	NaN	NaN	NaN	NaN	0.9462	NaN	NaN	NaN	NaN	NaN	NaN	NaN	NaN	NaN
998	NaN	NaN	1.0993	NaN	NaN	NaN	NaN	NaN	1.0887	NaN	1.1340	0.9886	NaN	1.1599	0.9071	NaN	NaN	1.1911	NaN	NaN	NaN	NaN	1.1112	1.1965	1.1262	0.9688	NaN	NaN	NaN	NaN	NaN	NaN	1.3432	0.9174	NaN	NaN	NaN	NaN	NaN	0.9855	NaN	NaN	NaN	NaN	NaN	NaN	NaN	NaN	NaN
999	NaN	NaN	0.9571	NaN	NaN	NaN	NaN	NaN	1.0664	NaN	1.0049	1.0519	NaN	1.1377	0.7356	NaN	NaN	0.9113	NaN	NaN	NaN	NaN	1.0853	0.8127	1.1395	0.9485	NaN	NaN	NaN	NaN	NaN	NaN	0.7189	0.9511	NaN	NaN	NaN	NaN	NaN	0.8840	NaN	NaN	NaN	NaN	NaN	NaN	NaN	NaN	NaN
1000	NaN	NaN	0.9696	NaN	NaN	NaN	NaN	NaN	1.2357	NaN	1.0553	1.0169	NaN	1.0864	1.0883	NaN	NaN	1.0982	NaN	NaN	NaN	NaN	0.8751	0.9563	0.9124	0.9860	NaN	NaN	NaN	NaN	NaN	NaN	1.1309	1.1281	NaN	NaN	NaN	NaN	NaN	1.0162	NaN	NaN	NaN	NaN	NaN	NaN	NaN	NaN	NaN
1001	NaN	NaN	1.0325	NaN	NaN	NaN	NaN	NaN	0.9711	NaN	1.1595	0.8068	NaN	0.9282	1.0919	NaN	NaN	0.8549	NaN	NaN	NaN	NaN	1.0099	0.8879	0.9112	1.2327	NaN	NaN	NaN	NaN	NaN	NaN	1.1530	1.1103	NaN	NaN	NaN	NaN	NaN	0.8593	NaN	NaN	NaN	NaN	NaN	NaN	NaN	NaN	NaN
1002	NaN	NaN	1.0003	NaN	NaN	NaN	NaN	NaN	1.3137	NaN	1.1650	0.9310	NaN	0.9717	1.1305	NaN	NaN	1.0110	NaN	NaN	NaN	NaN	1.0252	1.5051	1.5129	1.1912	NaN	NaN	NaN	NaN	NaN	NaN	1.1714	0.9544	NaN	NaN	NaN	NaN	NaN	1.1630	NaN	NaN	NaN	NaN	NaN	NaN	NaN	NaN	NaN
1003	NaN	NaN	1.0963	NaN	NaN	NaN	NaN	NaN	1.0332	NaN	1.1191	0.9382	NaN	1.0525	1.0400	NaN	NaN	0.8657	NaN	NaN	NaN	NaN	1.0343	0.9533	0.9303	0.9304	NaN	NaN	NaN	NaN	NaN	NaN	0.8973	0.8790	NaN	NaN	NaN	NaN	NaN	1.4234	NaN	NaN	NaN	NaN	NaN	NaN	NaN	NaN	NaN
1004	NaN	NaN	0.8871	NaN	NaN	NaN	NaN	NaN	1.2331	NaN	0.9477	1.0493	NaN	1.1777	1.0571	NaN	NaN	1.1150	NaN	NaN	NaN	NaN	0.9899	1.1345	1.0893	1.0236	NaN	NaN	NaN	NaN	NaN	NaN	1.2010	1.0668	NaN	NaN	NaN	NaN	NaN	1.2063	NaN	NaN	NaN	NaN	NaN	NaN	NaN	NaN	NaN
1005	NaN	NaN	0.8277	NaN	NaN	NaN	NaN	NaN	0.8590	NaN	0.9574	0.9334	NaN	0.8833	0.9616	NaN	NaN	0.7478	NaN	NaN	NaN	NaN	0.5873	0.9843	1.2232	1.0029	NaN	NaN	NaN	NaN	NaN	NaN	0.8833	1.1644	NaN	NaN	NaN	NaN	NaN	0.9378	NaN	NaN	NaN	NaN	NaN	NaN	NaN	NaN	NaN
1006	NaN	NaN	1.0937	NaN	NaN	NaN	NaN	NaN	1.0584	NaN	1.2057	0.8769	NaN	1.0114	1.1102	NaN	NaN	0.9944	NaN	NaN	NaN	NaN	1.0868	1.1097	1.1341	1.1079	NaN	NaN	NaN	NaN	NaN	NaN	1.0246	1.1803	NaN	NaN	NaN	NaN	NaN	1.3290	NaN	NaN	NaN	NaN	NaN	NaN	NaN	NaN	NaN
1007	NaN	NaN	1.0123	NaN	NaN	NaN	NaN	NaN	1.1867	NaN	1.0268	1.0426	NaN	1.1148	1.0719	NaN	NaN	1.0374	NaN	NaN	NaN	NaN	0.8800	0.7266	0.7425	0.7483	NaN	NaN	NaN	NaN	NaN	NaN	1.0152	1.0230	NaN	NaN	NaN	NaN	NaN	0.8640	NaN	NaN	NaN	NaN	NaN	NaN	NaN	NaN	NaN
1008	NaN	NaN	1.0761	NaN	NaN	NaN	NaN	NaN	0.9569	NaN	1.0825	0.9765	NaN	1.0060	1.1256	NaN	NaN	1.1128	NaN	NaN	NaN	NaN	0.8960	1.2190	1.3031	1.1939	NaN	NaN	NaN	NaN	NaN	NaN	1.4573	1.2429	NaN	NaN	NaN	NaN	NaN	1.2555	NaN	NaN	NaN	NaN	NaN	NaN	NaN	NaN	NaN
1009	NaN	NaN	1.0176	NaN	NaN	NaN	NaN	NaN	1.1425	NaN	1.0189	1.0436	NaN	0.9692	1.0993	NaN	NaN	0.9797	NaN	NaN	NaN	NaN	1.2281	0.9002	1.1923	1.0904	NaN	NaN	NaN	NaN	NaN	NaN	1.2505	1.2293	NaN	NaN	NaN	NaN	NaN	1.2599	NaN	NaN	NaN	NaN	NaN	NaN	NaN	NaN	NaN
1010	NaN	NaN	0.9772	NaN	NaN	NaN	NaN	NaN	1.3309	NaN	0.9268	0.9586	NaN	0.9480	0.9629	NaN	NaN	0.9751	NaN	NaN	NaN	NaN	0.7498	0.8775	0.8822	0.8521	NaN	NaN	NaN	NaN	NaN	NaN	0.9295	0.9394	NaN	NaN	NaN	NaN	NaN	0.9813	NaN	NaN	NaN	NaN	NaN	NaN	NaN	NaN	NaN
1011	NaN	NaN	0.9638	NaN	NaN	NaN	NaN	NaN	0.8772	NaN	1.1361	1.0227	NaN	0.8400	1.1470	NaN	NaN	1.1257	NaN	NaN	NaN	NaN	1.0055	0.9242	0.8296	1.1842	NaN	NaN	NaN	NaN	NaN	NaN	1.1198	1.0152	NaN	NaN	NaN	NaN	NaN	1.0243	NaN	NaN	NaN	NaN	NaN	NaN	NaN	NaN	NaN
1012	NaN	NaN	0.9109	NaN	NaN	NaN	NaN	NaN	0.7894	NaN	0.9339	0.9507	NaN	1.0268	1.2766	NaN	NaN	1.0179	NaN	NaN	NaN	NaN	0.8563	1.4775	1.5274	1.0885	NaN	NaN	NaN	NaN	NaN	NaN	0.3803	0.6081	NaN	NaN	NaN	NaN	NaN	0.3844	NaN	NaN	NaN	NaN	NaN	NaN	NaN	NaN	NaN
1013	NaN	NaN	1.0281	NaN	NaN	NaN	NaN	NaN	1.2002	NaN	1.0757	1.1174	NaN	1.0631	1.3817	NaN	NaN	1.0695	NaN	NaN	NaN	NaN	1.0877	1.0539	1.2682	0.8141	NaN	NaN	NaN	NaN	NaN	NaN	1.1335	1.0896	NaN	NaN	NaN	NaN	NaN	1.2473	NaN	NaN	NaN	NaN	NaN	NaN	NaN	NaN	NaN
1014	NaN	NaN	0.9755	NaN	NaN	NaN	NaN	NaN	0.7702	NaN	1.0628	1.0328	NaN	0.9748	1.0599	NaN	NaN	0.9275	NaN	NaN	NaN	NaN	1.0241	0.8139	0.5372	0.8242	NaN	NaN	NaN	NaN	NaN	NaN	0.7964	1.0321	NaN	NaN	NaN	NaN	NaN	0.9918	NaN	NaN	NaN	NaN	NaN	NaN	NaN	NaN	NaN
1015	NaN	NaN	1.0008	NaN	NaN	NaN	NaN	NaN	1.0736	NaN	1.2538	1.0360	NaN	0.9476	1.0974	NaN	NaN	1.1631	NaN	NaN	NaN	NaN	1.0180	0.8353	0.9495	0.8154	NaN	NaN	NaN	NaN	NaN	NaN	0.9479	1.0283	NaN	NaN	NaN	NaN	NaN	1.0424	NaN	NaN	NaN	NaN	NaN	NaN	NaN	NaN	NaN
1016	NaN	NaN	1.0253	NaN	NaN	NaN	NaN	NaN	0.9901	NaN	1.2318	0.9552	NaN	0.9084	1.0039	NaN	NaN	0.8252	NaN	NaN	NaN	NaN	1.0370	1.0395	1.0378	1.1124	NaN	NaN	NaN	NaN	NaN	NaN	1.0019	0.8716	NaN	NaN	NaN	NaN	NaN	1.0348	NaN	NaN	NaN	NaN	NaN	NaN	NaN	NaN	NaN
1017	NaN	NaN	1.0476	NaN	NaN	NaN	NaN	NaN	1.3338	NaN	1.1113	1.1281	NaN	1.1470	1.1456	NaN	NaN	1.0516	NaN	NaN	NaN	NaN	1.0937	1.1765	1.0674	1.1005	NaN	NaN	NaN	NaN	NaN	NaN	0.8549	1.0860	NaN	NaN	NaN	NaN	NaN	0.7371	NaN	NaN	NaN	NaN	NaN	NaN	NaN	NaN	NaN
1018	NaN	NaN	0.7438	NaN	NaN	NaN	NaN	NaN	1.1246	NaN	0.9321	1.0304	NaN	1.0527	0.8593	NaN	NaN	0.9723	NaN	NaN	NaN	NaN	1.0450	1.0441	0.7483	1.0200	NaN	NaN	NaN	NaN	NaN	NaN	0.9759	0.8673	NaN	NaN	NaN	NaN	NaN	1.0295	NaN	NaN	NaN	NaN	NaN	NaN	NaN	NaN	NaN
1019	NaN	NaN	0.9091	NaN	NaN	NaN	NaN	NaN	1.0532	NaN	1.1988	1.2136	NaN	1.0793	1.2504	NaN	NaN	0.8995	NaN	NaN	NaN	NaN	0.8480	1.0866	0.8946	1.1948	NaN	NaN	NaN	NaN	NaN	NaN	1.3431	0.9642	NaN	NaN	NaN	NaN	NaN	1.2263	NaN	NaN	NaN	NaN	NaN	NaN	NaN	NaN	NaN
1020	NaN	NaN	0.9635	NaN	NaN	NaN	NaN	NaN	0.8878	NaN	1.0151	1.0689	NaN	0.9708	0.7041	NaN	NaN	0.8839	NaN	NaN	NaN	NaN	0.8447	1.1612	0.9415	0.9521	NaN	NaN	NaN	NaN	NaN	NaN	0.8885	0.9526	NaN	NaN	NaN	NaN	NaN	1.1971	NaN	NaN	NaN	NaN	NaN	NaN	NaN	NaN	NaN
1021	NaN	NaN	1.1148	NaN	NaN	NaN	NaN	NaN	0.8280	NaN	0.9997	0.9530	NaN	0.8353	0.6315	NaN	NaN	1.1276	NaN	NaN	NaN	NaN	0.9571	0.9182	0.8100	0.9234	NaN	NaN	NaN	NaN	NaN	NaN	0.8759	0.9938	NaN	NaN	NaN	NaN	NaN	0.9533	NaN	NaN	NaN	NaN	NaN	NaN	NaN	NaN	NaN
1022	NaN	NaN	1.0485	NaN	NaN	NaN	NaN	NaN	1.0289	NaN	0.9056	0.9178	NaN	0.8243	0.8308	NaN	NaN	0.9364	NaN	NaN	NaN	NaN	1.2340	0.6488	0.8963	0.6932	NaN	NaN	NaN	NaN	NaN	NaN	1.0568	1.1495	NaN	NaN	NaN	NaN	NaN	1.1712	NaN	NaN	NaN	NaN	NaN	NaN	NaN	NaN	NaN
1023	NaN	NaN	1.1882	NaN	NaN	NaN	NaN	NaN	1.3242	NaN	1.2326	1.1457	NaN	1.1543	1.3989	NaN	NaN	1.1895	NaN	NaN	NaN	NaN	0.8780	1.1817	1.3653	1.2599	NaN	NaN	NaN	NaN	NaN	NaN	1.5171	0.9159	NaN	NaN	NaN	NaN	NaN	1.2908	NaN	NaN	NaN	NaN	NaN	NaN	NaN	NaN	NaN
1024	NaN	NaN	1.1442	NaN	NaN	NaN	NaN	NaN	0.8487	NaN	1.1437	1.1215	NaN	1.0561	1.2120	NaN	NaN	1.0787	NaN	NaN	NaN	NaN	1.2406	1.1256	1.1467	0.9430	NaN	NaN	NaN	NaN	NaN	NaN	0.7673	0.8676	NaN	NaN	NaN	NaN	NaN	0.9296	NaN	NaN	NaN	NaN	NaN	NaN	NaN	NaN	NaN
1025	NaN	NaN	0.8103	NaN	NaN	NaN	NaN	NaN	0.7416	NaN	0.8062	0.8603	NaN	0.8704	0.7950	NaN	NaN	0.9185	NaN	NaN	NaN	NaN	1.0007	0.7142	0.8317	0.7951	NaN	NaN	NaN	NaN	NaN	NaN	0.8902	0.9561	NaN	NaN	NaN	NaN	NaN	0.8799	NaN	NaN	NaN	NaN	NaN	NaN	NaN	NaN	NaN
1026	NaN	NaN	0.9943	NaN	NaN	NaN	NaN	NaN	1.2272	NaN	1.1346	1.0617	NaN	0.9713	1.2735	NaN	NaN	0.8830	NaN	NaN	NaN	NaN	1.0204	1.1894	1.4274	1.0406	NaN	NaN	NaN	NaN	NaN	NaN	1.1323	1.0855	NaN	NaN	NaN	NaN	NaN	1.0314	NaN	NaN	NaN	NaN	NaN	NaN	NaN	NaN	NaN
1027	NaN	NaN	1.1126	NaN	NaN	NaN	NaN	NaN	1.1894	NaN	1.0485	1.0369	NaN	0.9623	1.0087	NaN	NaN	1.0611	NaN	NaN	NaN	NaN	0.9425	0.7010	0.8098	0.9958	NaN	NaN	NaN	NaN	NaN	NaN	1.1685	1.1273	NaN	NaN	NaN	NaN	NaN	1.0874	NaN	NaN	NaN	NaN	NaN	NaN	NaN	NaN	NaN
1028	NaN	NaN	0.9759	NaN	NaN	NaN	NaN	NaN	1.0011	NaN	0.9304	1.0059	NaN	1.0059	0.8465	NaN	NaN	0.9659	NaN	NaN	NaN	NaN	1.0550	1.0393	1.2310	0.9585	NaN	NaN	NaN	NaN	NaN	NaN	0.7295	0.9061	NaN	NaN	NaN	NaN	NaN	1.0537	NaN	NaN	NaN	NaN	NaN	NaN	NaN	NaN	NaN
1029	NaN	NaN	0.9827	NaN	NaN	NaN	NaN	NaN	0.8200	NaN	1.0506	1.0539	NaN	0.9748	0.9427	NaN	NaN	0.8573	NaN	NaN	NaN	NaN	0.9500	0.8262	0.7048	0.9023	NaN	NaN	NaN	NaN	NaN	NaN	0.7799	0.9704	NaN	NaN	NaN	NaN	NaN	0.8312	NaN	NaN	NaN	NaN	NaN	NaN	NaN	NaN	NaN
1030	NaN	NaN	0.9816	NaN	NaN	NaN	NaN	NaN	1.1308	NaN	0.9352	1.0620	NaN	1.0188	1.0671	NaN	NaN	1.0904	NaN	NaN	NaN	NaN	1.0952	1.1421	1.1935	1.1677	NaN	NaN	NaN	NaN	NaN	NaN	1.1665	0.8313	NaN	NaN	NaN	NaN	NaN	1.1146	NaN	NaN	NaN	NaN	NaN	NaN	NaN	NaN	NaN
1031	NaN	NaN	1.0761	NaN	NaN	NaN	NaN	NaN	1.0455	NaN	0.9719	1.1052	NaN	1.0459	1.0893	NaN	NaN	1.2081	NaN	NaN	NaN	NaN	1.2071	1.2758	1.3151	1.1229	NaN	NaN	NaN	NaN	NaN	NaN	1.2802	1.0578	NaN	NaN	NaN	NaN	NaN	1.4724	NaN	NaN	NaN	NaN	NaN	NaN	NaN	NaN	NaN
1032	NaN	NaN	0.9137	NaN	NaN	NaN	NaN	NaN	0.7590	NaN	1.0075	0.9406	NaN	0.9993	1.0970	NaN	NaN	0.9627	NaN	NaN	NaN	NaN	1.1673	0.8922	0.9312	0.8737	NaN	NaN	NaN	NaN	NaN	NaN	0.5612	1.0199	NaN	NaN	NaN	NaN	NaN	0.6729	NaN	NaN	NaN	NaN	NaN	NaN	NaN	NaN	NaN
1033	NaN	NaN	1.1002	NaN	NaN	NaN	NaN	NaN	0.9306	NaN	1.0537	0.9568	NaN	1.0327	1.0443	NaN	NaN	0.7443	NaN	NaN	NaN	NaN	1.0794	1.2341	1.2292	0.9882	NaN	NaN	NaN	NaN	NaN	NaN	0.8834	1.0246	NaN	NaN	NaN	NaN	NaN	1.1806	NaN	NaN	NaN	NaN	NaN	NaN	NaN	NaN	NaN
1034	NaN	NaN	1.0025	NaN	NaN	NaN	NaN	NaN	1.0549	NaN	1.0931	1.0381	NaN	1.0909	0.8741	NaN	NaN	0.9643	NaN	NaN	NaN	NaN	1.0202	0.8167	0.6292	0.9172	NaN	NaN	NaN	NaN	NaN	NaN	0.9599	1.0698	NaN	NaN	NaN	NaN	NaN	0.9411	NaN	NaN	NaN	NaN	NaN	NaN	NaN	NaN	NaN
1035	NaN	NaN	1.0360	NaN	NaN	NaN	NaN	NaN	0.6847	NaN	0.9235	0.8264	NaN	0.8967	0.7905	NaN	NaN	1.0758	NaN	NaN	NaN	NaN	0.7975	0.8060	0.5465	0.7313	NaN	NaN	NaN	NaN	NaN	NaN	0.9579	0.9512	NaN	NaN	NaN	NaN	NaN	0.8704	NaN	NaN	NaN	NaN	NaN	NaN	NaN	NaN	NaN
1036	NaN	NaN	1.0444	NaN	NaN	NaN	NaN	NaN	1.0940	NaN	1.1576	1.0529	NaN	0.9799	1.0692	NaN	NaN	1.0150	NaN	NaN	NaN	NaN	0.9534	1.1135	1.0298	0.9124	NaN	NaN	NaN	NaN	NaN	NaN	1.3774	1.2454	NaN	NaN	NaN	NaN	NaN	1.2619	NaN	NaN	NaN	NaN	NaN	NaN	NaN	NaN	NaN
1037	NaN	NaN	1.0814	NaN	NaN	NaN	NaN	NaN	0.9355	NaN	1.0667	1.0586	NaN	1.0882	0.9662	NaN	NaN	1.0799	NaN	NaN	NaN	NaN	0.9743	0.8683	0.7602	0.9582	NaN	NaN	NaN	NaN	NaN	NaN	0.7763	0.8607	NaN	NaN	NaN	NaN	NaN	0.7264	NaN	NaN	NaN	NaN	NaN	NaN	NaN	NaN	NaN
1038	NaN	NaN	0.9851	NaN	NaN	NaN	NaN	NaN	1.0866	NaN	0.9885	1.1131	NaN	1.0614	1.1633	NaN	NaN	1.0012	NaN	NaN	NaN	NaN	0.8345	1.4211	1.2051	1.1975	NaN	NaN	NaN	NaN	NaN	NaN	0.7679	0.7773	NaN	NaN	NaN	NaN	NaN	0.9284	NaN	NaN	NaN	NaN	NaN	NaN	NaN	NaN	NaN
1039	NaN	NaN	0.7608	NaN	NaN	NaN	NaN	NaN	1.0870	NaN	0.8823	0.8866	NaN	0.9643	1.0418	NaN	NaN	0.8491	NaN	NaN	NaN	NaN	0.6979	1.0664	1.1861	1.0106	NaN	NaN	NaN	NaN	NaN	NaN	0.8988	0.8788	NaN	NaN	NaN	NaN	NaN	0.7416	NaN	NaN	NaN	NaN	NaN	NaN	NaN	NaN	NaN
1040	NaN	NaN	0.8056	NaN	NaN	NaN	NaN	NaN	0.8453	NaN	0.9870	0.9128	NaN	0.8525	0.9932	NaN	NaN	0.9617	NaN	NaN	NaN	NaN	0.9415	1.0772	1.2562	1.0305	NaN	NaN	NaN	NaN	NaN	NaN	0.6039	0.8675	NaN	NaN	NaN	NaN	NaN	0.6511	NaN	NaN	NaN	NaN	NaN	NaN	NaN	NaN	NaN
1041	NaN	NaN	1.1198	NaN	NaN	NaN	NaN	NaN	1.1260	NaN	1.1762	1.1694	NaN	1.1108	0.9346	NaN	NaN	1.1108	NaN	NaN	NaN	NaN	1.1435	0.7481	0.8403	1.0841	NaN	NaN	NaN	NaN	NaN	NaN	1.0571	0.8822	NaN	NaN	NaN	NaN	NaN	1.0492	NaN	NaN	NaN	NaN	NaN	NaN	NaN	NaN	NaN
1042	NaN	NaN	1.1713	NaN	NaN	NaN	NaN	NaN	0.8467	NaN	1.0738	1.0341	NaN	1.0272	0.9708	NaN	NaN	1.0030	NaN	NaN	NaN	NaN	0.8715	0.8121	0.8472	1.0814	NaN	NaN	NaN	NaN	NaN	NaN	1.3070	1.0995	NaN	NaN	NaN	NaN	NaN	1.2367	NaN	NaN	NaN	NaN	NaN	NaN	NaN	NaN	NaN
1043	NaN	NaN	1.0790	NaN	NaN	NaN	NaN	NaN	0.5195	NaN	0.8112	0.8204	NaN	0.8379	1.0325	NaN	NaN	1.0229	NaN	NaN	NaN	NaN	0.9769	0.9745	0.9630	0.8916	NaN	NaN	NaN	NaN	NaN	NaN	0.8963	0.8486	NaN	NaN	NaN	NaN	NaN	1.0519	NaN	NaN	NaN	NaN	NaN	NaN	NaN	NaN	NaN
1044	NaN	NaN	0.8517	NaN	NaN	NaN	NaN	NaN	1.1084	NaN	0.8947	1.0466	NaN	0.9789	0.8257	NaN	NaN	1.0688	NaN	NaN	NaN	NaN	1.2695	0.7727	0.7314	0.8195	NaN	NaN	NaN	NaN	NaN	NaN	0.8396	1.0349	NaN	NaN	NaN	NaN	NaN	0.8464	NaN	NaN	NaN	NaN	NaN	NaN	NaN	NaN	NaN
1045	NaN	NaN	1.1133	NaN	NaN	NaN	NaN	NaN	1.2383	NaN	1.0862	1.1317	NaN	0.9806	1.1680	NaN	NaN	1.1491	NaN	NaN	NaN	NaN	0.8544	1.0779	1.1016	1.0957	NaN	NaN	NaN	NaN	NaN	NaN	1.3043	0.9828	NaN	NaN	NaN	NaN	NaN	1.2763	NaN	NaN	NaN	NaN	NaN	NaN	NaN	NaN	NaN
1046	NaN	NaN	0.8720	NaN	NaN	NaN	NaN	NaN	0.8771	NaN	0.9451	0.9362	NaN	0.9272	0.8020	NaN	NaN	1.0160	NaN	NaN	NaN	NaN	0.8914	0.8822	0.9805	0.8558	NaN	NaN	NaN	NaN	NaN	NaN	1.1743	1.0499	NaN	NaN	NaN	NaN	NaN	1.1707	NaN	NaN	NaN	NaN	NaN	NaN	NaN	NaN	NaN
1047	NaN	NaN	0.9913	NaN	NaN	NaN	NaN	NaN	0.8157	NaN	0.9684	0.9021	NaN	0.8516	0.8007	NaN	NaN	0.9279	NaN	NaN	NaN	NaN	0.8082	0.8937	0.9863	0.9470	NaN	NaN	NaN	NaN	NaN	NaN	0.7090	1.0875	NaN	NaN	NaN	NaN	NaN	0.8991	NaN	NaN	NaN	NaN	NaN	NaN	NaN	NaN	NaN
1048	NaN	NaN	0.9920	NaN	NaN	NaN	NaN	NaN	0.7873	NaN	0.9539	0.9261	NaN	0.9243	0.8503	NaN	NaN	0.9296	NaN	NaN	NaN	NaN	0.9140	1.0445	0.7976	1.0058	NaN	NaN	NaN	NaN	NaN	NaN	0.9521	1.0954	NaN	NaN	NaN	NaN	NaN	1.0616	NaN	NaN	NaN	NaN	NaN	NaN	NaN	NaN	NaN
1049	NaN	NaN	1.0300	NaN	NaN	NaN	NaN	NaN	1.0168	NaN	1.0494	1.0584	NaN	0.9780	0.7626	NaN	NaN	0.9734	NaN	NaN	NaN	NaN	1.1444	0.9222	1.0009	1.0039	NaN	NaN	NaN	NaN	NaN	NaN	1.2034	1.1516	NaN	NaN	NaN	NaN	NaN	0.9952	NaN	NaN	NaN	NaN	NaN	NaN	NaN	NaN	NaN
1050	NaN	NaN	1.0921	NaN	NaN	NaN	NaN	NaN	1.0534	NaN	1.0462	1.0085	NaN	0.9550	1.1131	NaN	NaN	1.0777	NaN	NaN	NaN	NaN	1.1159	0.7956	0.9919	1.0913	NaN	NaN	NaN	NaN	NaN	NaN	1.1403	1.0370	NaN	NaN	NaN	NaN	NaN	0.8343	NaN	NaN	NaN	NaN	NaN	NaN	NaN	NaN	NaN
1051	NaN	NaN	0.9368	NaN	NaN	NaN	NaN	NaN	1.2007	NaN	1.0215	1.1519	NaN	1.1104	1.1305	NaN	NaN	1.2108	NaN	NaN	NaN	NaN	0.8710	1.3896	1.5866	1.1842	NaN	NaN	NaN	NaN	NaN	NaN	0.8442	0.9415	NaN	NaN	NaN	NaN	NaN	0.9606	NaN	NaN	NaN	NaN	NaN	NaN	NaN	NaN	NaN
1052	NaN	NaN	0.8202	NaN	NaN	NaN	NaN	NaN	0.7568	NaN	0.7521	1.0595	NaN	1.0071	0.8581	NaN	NaN	1.1281	NaN	NaN	NaN	NaN	0.7584	1.1740	0.6209	0.7136	NaN	NaN	NaN	NaN	NaN	NaN	0.5517	0.8115	NaN	NaN	NaN	NaN	NaN	0.6129	NaN	NaN	NaN	NaN	NaN	NaN	NaN	NaN	NaN
1053	NaN	NaN	0.9347	NaN	NaN	NaN	NaN	NaN	0.7631	NaN	0.8622	0.8944	NaN	0.8800	0.8849	NaN	NaN	0.9296	NaN	NaN	NaN	NaN	0.8936	0.8813	0.7446	0.9204	NaN	NaN	NaN	NaN	NaN	NaN	1.1978	1.0405	NaN	NaN	NaN	NaN	NaN	1.1976	NaN	NaN	NaN	NaN	NaN	NaN	NaN	NaN	NaN
1054	NaN	NaN	1.0759	NaN	NaN	NaN	NaN	NaN	1.1065	NaN	1.1236	1.0207	NaN	0.9471	1.1936	NaN	NaN	0.8461	NaN	NaN	NaN	NaN	1.0519	1.1877	1.5039	1.2221	NaN	NaN	NaN	NaN	NaN	NaN	1.4697	1.0496	NaN	NaN	NaN	NaN	NaN	1.4289	NaN	NaN	NaN	NaN	NaN	NaN	NaN	NaN	NaN
1055	NaN	NaN	0.9709	NaN	NaN	NaN	NaN	NaN	0.8446	NaN	0.9882	0.9502	NaN	1.0132	0.7016	NaN	NaN	0.8240	NaN	NaN	NaN	NaN	1.0020	0.9267	0.7927	0.9308	NaN	NaN	NaN	NaN	NaN	NaN	0.8368	0.6967	NaN	NaN	NaN	NaN	NaN	0.6476	NaN	NaN	NaN	NaN	NaN	NaN	NaN	NaN	NaN
1056	NaN	NaN	1.0272	NaN	NaN	NaN	NaN	NaN	1.0828	NaN	1.0699	1.0460	NaN	0.9500	1.0279	NaN	NaN	1.2315	NaN	NaN	NaN	NaN	0.9532	1.0842	1.0555	1.0618	NaN	NaN	NaN	NaN	NaN	NaN	0.7812	0.9934	NaN	NaN	NaN	NaN	NaN	0.9276	NaN	NaN	NaN	NaN	NaN	NaN	NaN	NaN	NaN
1057	NaN	NaN	0.9735	NaN	NaN	NaN	NaN	NaN	0.9978	NaN	0.9578	1.0441	NaN	1.0841	0.9023	NaN	NaN	1.1972	NaN	NaN	NaN	NaN	0.9937	0.8969	0.8992	0.9485	NaN	NaN	NaN	NaN	NaN	NaN	1.3174	1.0719	NaN	NaN	NaN	NaN	NaN	1.2466	NaN	NaN	NaN	NaN	NaN	NaN	NaN	NaN	NaN
1058	NaN	NaN	0.9737	NaN	NaN	NaN	NaN	NaN	0.9851	NaN	0.9660	1.0889	NaN	1.0243	1.0950	NaN	NaN	0.8065	NaN	NaN	NaN	NaN	0.8581	1.0895	1.2097	1.0593	NaN	NaN	NaN	NaN	NaN	NaN	1.0250	0.7882	NaN	NaN	NaN	NaN	NaN	0.7917	NaN	NaN	NaN	NaN	NaN	NaN	NaN	NaN	NaN
1059	NaN	NaN	0.8358	NaN	NaN	NaN	NaN	NaN	0.6768	NaN	0.6578	0.8892	NaN	0.8468	0.7706	NaN	NaN	1.0006	NaN	NaN	NaN	NaN	0.9694	0.7587	0.8135	0.7577	NaN	NaN	NaN	NaN	NaN	NaN	0.4027	0.7490	NaN	NaN	NaN	NaN	NaN	0.5790	NaN	NaN	NaN	NaN	NaN	NaN	NaN	NaN	NaN
1060	NaN	NaN	0.8978	NaN	NaN	NaN	NaN	NaN	0.8069	NaN	0.8380	0.8529	NaN	0.8097	0.8531	NaN	NaN	0.8991	NaN	NaN	NaN	NaN	1.1644	1.1012	1.1241	1.2527	NaN	NaN	NaN	NaN	NaN	NaN	1.0458	1.0745	NaN	NaN	NaN	NaN	NaN	0.8619	NaN	NaN	NaN	NaN	NaN	NaN	NaN	NaN	NaN
1061	NaN	NaN	1.0675	NaN	NaN	NaN	NaN	NaN	1.0460	NaN	1.1586	1.2547	NaN	1.0968	1.0213	NaN	NaN	1.1644	NaN	NaN	NaN	NaN	1.0400	0.8790	1.0953	1.1252	NaN	NaN	NaN	NaN	NaN	NaN	1.0307	0.9928	NaN	NaN	NaN	NaN	NaN	1.0539	NaN	NaN	NaN	NaN	NaN	NaN	NaN	NaN	NaN
1062	NaN	NaN	1.1437	NaN	NaN	NaN	NaN	NaN	1.1504	NaN	1.0336	1.0633	NaN	1.0509	0.9863	NaN	NaN	0.6023	NaN	NaN	NaN	NaN	0.9945	1.0217	0.7862	0.9274	NaN	NaN	NaN	NaN	NaN	NaN	0.7791	0.9990	NaN	NaN	NaN	NaN	NaN	0.8064	NaN	NaN	NaN	NaN	NaN	NaN	NaN	NaN	NaN
1063	NaN	NaN	1.1174	NaN	NaN	NaN	NaN	NaN	0.8563	NaN	1.1682	1.0185	NaN	0.9939	1.1048	NaN	NaN	1.1700	NaN	NaN	NaN	NaN	1.3439	1.2251	1.1241	0.9336	NaN	NaN	NaN	NaN	NaN	NaN	1.1089	1.1242	NaN	NaN	NaN	NaN	NaN	0.6825	NaN	NaN	NaN	NaN	NaN	NaN	NaN	NaN	NaN
1064	NaN	NaN	1.0855	NaN	NaN	NaN	NaN	NaN	1.6166	NaN	1.1277	1.1272	NaN	0.9273	1.0762	NaN	NaN	1.0315	NaN	NaN	NaN	NaN	0.7073	1.0031	0.9489	1.1167	NaN	NaN	NaN	NaN	NaN	NaN	1.3692	1.2130	NaN	NaN	NaN	NaN	NaN	1.3482	NaN	NaN	NaN	NaN	NaN	NaN	NaN	NaN	NaN
1065	NaN	NaN	1.0616	NaN	NaN	NaN	NaN	NaN	0.9284	NaN	1.0555	1.0004	NaN	0.9993	0.9401	NaN	NaN	1.1424	NaN	NaN	NaN	NaN	1.0007	0.7637	0.8957	0.9768	NaN	NaN	NaN	NaN	NaN	NaN	0.8885	0.9180	NaN	NaN	NaN	NaN	NaN	1.1365	NaN	NaN	NaN	NaN	NaN	NaN	NaN	NaN	NaN
1066	NaN	NaN	0.9274	NaN	NaN	NaN	NaN	NaN	1.1363	NaN	0.9609	0.9853	NaN	0.9368	0.9038	NaN	NaN	0.9168	NaN	NaN	NaN	NaN	1.0407	0.8152	0.7465	0.7866	NaN	NaN	NaN	NaN	NaN	NaN	0.8691	1.2208	NaN	NaN	NaN	NaN	NaN	0.8555	NaN	NaN	NaN	NaN	NaN	NaN	NaN	NaN	NaN
1067	NaN	NaN	1.0112	NaN	NaN	NaN	NaN	NaN	1.0883	NaN	1.0839	0.9929	NaN	1.0360	1.2186	NaN	NaN	0.9447	NaN	NaN	NaN	NaN	0.9821	1.2043	1.1349	1.2381	NaN	NaN	NaN	NaN	NaN	NaN	0.6960	0.9963	NaN	NaN	NaN	NaN	NaN	0.6827	NaN	NaN	NaN	NaN	NaN	NaN	NaN	NaN	NaN
1068	NaN	NaN	0.9925	NaN	NaN	NaN	NaN	NaN	0.8203	NaN	1.0450	0.9592	NaN	0.9738	1.0578	NaN	NaN	1.0616	NaN	NaN	NaN	NaN	0.9166	1.2505	1.1160	1.1400	NaN	NaN	NaN	NaN	NaN	NaN	1.3402	1.1094	NaN	NaN	NaN	NaN	NaN	1.3551	NaN	NaN	NaN	NaN	NaN	NaN	NaN	NaN	NaN
1069	NaN	NaN	1.0189	NaN	NaN	NaN	NaN	NaN	0.9894	NaN	0.9688	0.9524	NaN	0.8296	0.9498	NaN	NaN	0.9547	NaN	NaN	NaN	NaN	0.8526	0.8853	0.9284	0.8463	NaN	NaN	NaN	NaN	NaN	NaN	0.7630	0.7303	NaN	NaN	NaN	NaN	NaN	0.7090	NaN	NaN	NaN	NaN	NaN	NaN	NaN	NaN	NaN
1070	NaN	NaN	0.8031	NaN	NaN	NaN	NaN	NaN	0.8002	NaN	0.7633	0.6930	NaN	0.7632	0.8273	NaN	NaN	1.0375	NaN	NaN	NaN	NaN	0.6868	0.6204	0.8797	0.7627	NaN	NaN	NaN	NaN	NaN	NaN	0.6599	0.7211	NaN	NaN	NaN	NaN	NaN	0.7479	NaN	NaN	NaN	NaN	NaN	NaN	NaN	NaN	NaN
1071	NaN	NaN	1.1164	NaN	NaN	NaN	NaN	NaN	0.9533	NaN	1.1926	0.9897	NaN	0.9080	1.0822	NaN	NaN	1.1056	NaN	NaN	NaN	NaN	1.1674	1.1930	1.0527	1.1349	NaN	NaN	NaN	NaN	NaN	NaN	0.7312	0.9255	NaN	NaN	NaN	NaN	NaN	1.1476	NaN	NaN	NaN	NaN	NaN	NaN	NaN	NaN	NaN
1072	NaN	NaN	0.7599	NaN	NaN	NaN	NaN	NaN	0.9971	NaN	0.8305	0.9536	NaN	1.0230	0.7453	NaN	NaN	0.9311	NaN	NaN	NaN	NaN	0.9639	0.7927	0.6629	0.7440	NaN	NaN	NaN	NaN	NaN	NaN	0.5081	0.6883	NaN	NaN	NaN	NaN	NaN	0.6446	NaN	NaN	NaN	NaN	NaN	NaN	NaN	NaN	NaN
1073	NaN	NaN	1.0685	NaN	NaN	NaN	NaN	NaN	0.9470	NaN	1.1023	0.9852	NaN	0.9142	0.9772	NaN	NaN	0.8938	NaN	NaN	NaN	NaN	0.9030	1.0445	0.9279	1.0499	NaN	NaN	NaN	NaN	NaN	NaN	1.1448	1.1094	NaN	NaN	NaN	NaN	NaN	0.9693	NaN	NaN	NaN	NaN	NaN	NaN	NaN	NaN	NaN
1074	NaN	NaN	0.9584	NaN	NaN	NaN	NaN	NaN	1.0040	NaN	1.0450	0.9702	NaN	0.9665	0.9634	NaN	NaN	0.8389	NaN	NaN	NaN	NaN	1.0370	0.9864	1.0206	1.0920	NaN	NaN	NaN	NaN	NaN	NaN	0.8496	1.0249	NaN	NaN	NaN	NaN	NaN	0.8901	NaN	NaN	NaN	NaN	NaN	NaN	NaN	NaN	NaN
1075	NaN	NaN	1.0663	NaN	NaN	NaN	NaN	NaN	1.1623	NaN	1.0428	1.0731	NaN	1.0443	1.0642	NaN	NaN	1.1695	NaN	NaN	NaN	NaN	0.9717	1.0292	0.8639	1.0845	NaN	NaN	NaN	NaN	NaN	NaN	0.7623	0.7066	NaN	NaN	NaN	NaN	NaN	0.6384	NaN	NaN	NaN	NaN	NaN	NaN	NaN	NaN	NaN
1076	NaN	NaN	1.1919	NaN	NaN	NaN	NaN	NaN	1.2932	NaN	1.0356	0.9843	NaN	1.0271	1.1307	NaN	NaN	1.0843	NaN	NaN	NaN	NaN	1.0059	1.2552	1.3209	1.1949	NaN	NaN	NaN	NaN	NaN	NaN	1.1849	1.1548	NaN	NaN	NaN	NaN	NaN	1.1732	NaN	NaN	NaN	NaN	NaN	NaN	NaN	NaN	NaN
1077	NaN	NaN	0.8056	NaN	NaN	NaN	NaN	NaN	0.9822	NaN	0.9392	1.0139	NaN	0.9933	0.8597	NaN	NaN	1.2899	NaN	NaN	NaN	NaN	0.8154	0.9633	0.9166	0.9121	NaN	NaN	NaN	NaN	NaN	NaN	1.2742	1.0305	NaN	NaN	NaN	NaN	NaN	0.9185	NaN	NaN	NaN	NaN	NaN	NaN	NaN	NaN	NaN
1078	NaN	NaN	1.0688	NaN	NaN	NaN	NaN	NaN	0.7407	NaN	0.9478	0.7018	NaN	0.7798	1.0786	NaN	NaN	0.9479	NaN	NaN	NaN	NaN	0.1859	1.0189	0.8683	1.0806	NaN	NaN	NaN	NaN	NaN	NaN	1.6055	0.8637	NaN	NaN	NaN	NaN	NaN	1.0755	NaN	NaN	NaN	NaN	NaN	NaN	NaN	NaN	NaN
1079	NaN	NaN	0.9939	NaN	NaN	NaN	NaN	NaN	1.5206	NaN	1.0906	1.1884	NaN	1.1061	1.3953	NaN	NaN	0.9007	NaN	NaN	NaN	NaN	1.3481	1.2422	1.0877	1.2058	NaN	NaN	NaN	NaN	NaN	NaN	1.2581	1.1409	NaN	NaN	NaN	NaN	NaN	1.0850	NaN	NaN	NaN	NaN	NaN	NaN	NaN	NaN	NaN
1080	NaN	NaN	1.1034	NaN	NaN	NaN	NaN	NaN	1.3482	NaN	1.0145	1.0062	NaN	1.0829	0.9352	NaN	NaN	1.1341	NaN	NaN	NaN	NaN	1.3381	1.0454	1.0884	1.2087	NaN	NaN	NaN	NaN	NaN	NaN	1.0144	1.0401	NaN	NaN	NaN	NaN	NaN	0.9968	NaN	NaN	NaN	NaN	NaN	NaN	NaN	NaN	NaN
1081	NaN	NaN	0.9263	NaN	NaN	NaN	NaN	NaN	1.3769	NaN	0.9384	1.3126	NaN	1.2252	0.8631	NaN	NaN	1.1648	NaN	NaN	NaN	NaN	1.4516	0.9944	0.8569	0.8067	NaN	NaN	NaN	NaN	NaN	NaN	0.6873	1.0151	NaN	NaN	NaN	NaN	NaN	0.8040	NaN	NaN	NaN	NaN	NaN	NaN	NaN	NaN	NaN
1082	NaN	NaN	0.9036	NaN	NaN	NaN	NaN	NaN	1.1537	NaN	0.8556	0.8943	NaN	0.8840	0.6738	NaN	NaN	0.8365	NaN	NaN	NaN	NaN	1.0598	0.7652	0.7252	0.6036	NaN	NaN	NaN	NaN	NaN	NaN	0.9944	1.0993	NaN	NaN	NaN	NaN	NaN	0.8649	NaN	NaN	NaN	NaN	NaN	NaN	NaN	NaN	NaN
1083	NaN	NaN	1.0947	NaN	NaN	NaN	NaN	NaN	0.9575	NaN	1.2149	0.7679	0.8875	0.7043	1.1338	NaN	NaN	0.8304	NaN	NaN	NaN	NaN	0.9781	1.1605	1.2100	1.2875	NaN	NaN	NaN	NaN	NaN	NaN	0.5670	0.7608	NaN	NaN	NaN	NaN	NaN	0.5645	NaN	NaN	NaN	NaN	NaN	NaN	NaN	NaN	NaN
1084	NaN	NaN	1.0519	NaN	NaN	NaN	NaN	NaN	0.9993	NaN	0.9909	1.1860	0.9382	1.0891	0.9123	NaN	NaN	1.0891	NaN	NaN	NaN	NaN	1.3550	0.9193	0.8239	1.0204	NaN	NaN	NaN	NaN	NaN	NaN	1.5456	1.0810	NaN	NaN	NaN	NaN	NaN	1.0475	NaN	NaN	NaN	NaN	NaN	NaN	NaN	NaN	NaN
1085	NaN	NaN	1.0189	NaN	NaN	NaN	NaN	NaN	0.8737	NaN	1.0560	1.0777	1.0018	1.0390	0.9273	NaN	NaN	1.1520	NaN	NaN	NaN	NaN	1.0731	0.8548	0.9636	0.9470	NaN	NaN	NaN	NaN	NaN	NaN	0.8926	0.8849	NaN	NaN	NaN	NaN	NaN	0.7569	NaN	NaN	NaN	NaN	NaN	NaN	NaN	NaN	NaN
1086	NaN	NaN	0.9894	NaN	NaN	NaN	NaN	NaN	0.9407	NaN	0.8973	1.0312	1.2648	1.0164	1.0683	NaN	NaN	0.8665	NaN	NaN	NaN	NaN	1.1566	1.2257	0.9044	0.9790	NaN	NaN	NaN	NaN	NaN	NaN	1.1062	0.8923	NaN	NaN	NaN	NaN	NaN	0.8593	NaN	NaN	NaN	NaN	NaN	NaN	NaN	NaN	NaN
1087	NaN	NaN	1.1885	NaN	NaN	NaN	NaN	NaN	1.2488	NaN	1.1296	1.0330	1.2815	1.0560	1.4538	NaN	NaN	1.0308	NaN	NaN	NaN	NaN	0.9433	1.3327	1.2990	1.2981	NaN	NaN	NaN	NaN	NaN	NaN	1.1046	1.0976	NaN	NaN	NaN	NaN	NaN	1.1476	NaN	NaN	NaN	NaN	NaN	NaN	NaN	NaN	NaN
1088	NaN	NaN	1.0465	NaN	NaN	NaN	NaN	NaN	0.8947	NaN	0.9343	1.0256	0.9908	1.1259	0.8006	NaN	NaN	1.0516	NaN	NaN	NaN	NaN	1.2160	0.8500	0.8282	0.9624	NaN	NaN	NaN	NaN	NaN	NaN	1.0403	0.9793	NaN	NaN	NaN	NaN	NaN	1.0445	NaN	NaN	NaN	NaN	NaN	NaN	NaN	NaN	NaN
1089	NaN	NaN	1.0571	NaN	NaN	NaN	NaN	NaN	0.8095	NaN	1.0842	0.9748	1.0810	0.9505	0.9305	NaN	NaN	1.0386	NaN	NaN	NaN	NaN	0.8395	1.0285	1.2258	1.0227	NaN	NaN	NaN	NaN	NaN	NaN	1.1497	1.2492	NaN	NaN	NaN	NaN	NaN	1.2604	NaN	NaN	NaN	NaN	NaN	NaN	NaN	NaN	NaN
1090	NaN	NaN	0.8294	NaN	NaN	NaN	NaN	NaN	1.0648	NaN	0.7999	1.0057	1.2723	0.9617	1.1471	NaN	NaN	0.9956	NaN	NaN	NaN	NaN	1.0197	1.0687	0.8909	0.9729	NaN	NaN	NaN	NaN	NaN	NaN	0.7750	0.7032	NaN	NaN	NaN	NaN	NaN	0.7486	NaN	NaN	NaN	NaN	NaN	NaN	NaN	NaN	NaN
1091	NaN	NaN	1.0187	NaN	NaN	NaN	NaN	NaN	1.0054	NaN	1.0601	0.9111	1.2072	0.8987	1.0756	NaN	NaN	0.7526	NaN	NaN	NaN	NaN	1.0930	1.0196	0.8426	0.9559	NaN	NaN	NaN	NaN	NaN	NaN	1.2763	1.1610	NaN	NaN	NaN	NaN	NaN	1.5450	NaN	NaN	NaN	NaN	NaN	NaN	NaN	NaN	NaN
1092	NaN	NaN	0.8809	NaN	NaN	NaN	NaN	NaN	0.9456	NaN	0.8920	0.9249	0.9544	0.8788	0.9348	NaN	NaN	0.9348	NaN	NaN	NaN	NaN	1.1157	0.8491	0.8127	0.8053	NaN	NaN	NaN	NaN	NaN	NaN	0.7940	0.9891	NaN	NaN	NaN	NaN	NaN	0.9739	NaN	NaN	NaN	NaN	NaN	NaN	NaN	NaN	NaN
1093	NaN	NaN	0.8434	NaN	NaN	NaN	NaN	NaN	0.6276	NaN	0.8255	0.7360	0.6951	0.7112	0.9137	NaN	NaN	0.8494	NaN	NaN	NaN	NaN	0.7515	1.1634	1.2322	1.0485	NaN	NaN	NaN	NaN	NaN	NaN	0.9166	1.0488	NaN	NaN	NaN	NaN	NaN	0.5917	NaN	NaN	NaN	NaN	NaN	NaN	NaN	NaN	NaN
1094	NaN	NaN	1.1049	NaN	NaN	NaN	NaN	NaN	0.9838	NaN	1.2145	1.1413	0.9532	1.0608	0.9387	NaN	NaN	0.9924	NaN	NaN	NaN	NaN	0.9452	0.9471	0.6062	0.9240	NaN	NaN	NaN	NaN	NaN	NaN	1.0877	0.8879	NaN	NaN	NaN	NaN	NaN	1.2586	NaN	NaN	NaN	NaN	NaN	NaN	NaN	NaN	NaN
1095	NaN	NaN	1.0289	NaN	NaN	NaN	NaN	NaN	0.9191	NaN	1.1107	1.1499	1.1648	1.0675	1.0085	NaN	NaN	1.0169	NaN	NaN	NaN	NaN	0.8745	1.0517	0.8987	1.2113	NaN	NaN	NaN	NaN	NaN	NaN	1.0261	0.9260	NaN	NaN	NaN	NaN	NaN	1.1249	NaN	NaN	NaN	NaN	NaN	NaN	NaN	NaN	NaN
1096	NaN	NaN	0.9334	NaN	NaN	NaN	NaN	NaN	1.0441	NaN	0.9308	1.0318	1.5572	1.0218	1.1462	NaN	NaN	0.9312	NaN	NaN	NaN	NaN	0.9694	1.0802	0.9115	0.7933	NaN	NaN	NaN	NaN	NaN	NaN	1.0349	1.0541	NaN	NaN	NaN	NaN	NaN	1.2818	NaN	NaN	NaN	NaN	NaN	NaN	NaN	NaN	NaN
1097	NaN	NaN	1.0214	NaN	NaN	NaN	NaN	NaN	0.7754	NaN	1.0166	0.9923	1.0915	0.9910	0.8801	NaN	NaN	1.1548	NaN	NaN	NaN	NaN	1.0963	0.7466	0.7341	0.9126	NaN	NaN	NaN	NaN	NaN	NaN	1.0626	0.9305	NaN	NaN	NaN	NaN	NaN	0.8667	NaN	NaN	NaN	NaN	NaN	NaN	NaN	NaN	NaN
1098	NaN	NaN	0.8217	NaN	NaN	NaN	NaN	NaN	0.7018	NaN	0.7545	0.6248	0.5511	0.6998	0.7464	NaN	NaN	0.7878	NaN	NaN	NaN	NaN	0.7246	1.0536	1.0958	0.9607	NaN	NaN	NaN	NaN	NaN	NaN	0.6143	0.8570	NaN	NaN	NaN	NaN	NaN	0.9722	NaN	NaN	NaN	NaN	NaN	NaN	NaN	NaN	NaN
1099	NaN	NaN	1.0998	NaN	NaN	NaN	NaN	NaN	1.2666	NaN	1.1067	1.1681	1.2516	1.0906	1.0414	NaN	NaN	0.8538	NaN	NaN	NaN	NaN	1.1686	1.1053	0.9311	1.0230	NaN	NaN	NaN	NaN	NaN	NaN	1.1530	0.9089	NaN	NaN	NaN	NaN	NaN	0.8389	NaN	NaN	NaN	NaN	NaN	NaN	NaN	NaN	NaN
1100	NaN	NaN	1.2080	NaN	NaN	NaN	NaN	NaN	1.1454	NaN	1.1729	1.2438	1.2846	1.2208	1.1086	NaN	NaN	1.1424	NaN	NaN	NaN	NaN	0.7425	1.2413	1.0610	1.1278	NaN	NaN	NaN	NaN	NaN	NaN	1.2441	1.0383	NaN	NaN	NaN	NaN	NaN	1.1270	NaN	NaN	NaN	NaN	NaN	NaN	NaN	NaN	NaN
1101	NaN	NaN	1.1057	NaN	NaN	NaN	NaN	NaN	0.5763	NaN	1.0214	0.7945	0.7438	0.8356	0.9993	NaN	NaN	1.0592	NaN	NaN	NaN	NaN	1.0770	0.9156	0.8149	1.0215	NaN	NaN	NaN	NaN	NaN	NaN	1.1299	1.0948	NaN	NaN	NaN	NaN	NaN	1.3033	NaN	NaN	NaN	NaN	NaN	NaN	NaN	NaN	NaN
1102	NaN	NaN	1.0079	NaN	NaN	NaN	NaN	NaN	0.9098	NaN	1.0322	1.0675	1.1718	1.0315	1.1890	NaN	NaN	1.1169	NaN	NaN	NaN	NaN	1.0537	0.9002	1.0894	0.8913	NaN	NaN	NaN	NaN	NaN	NaN	0.9741	0.7012	NaN	NaN	NaN	NaN	NaN	1.0661	NaN	NaN	NaN	NaN	NaN	NaN	NaN	NaN	NaN
1103	NaN	NaN	0.9682	NaN	NaN	NaN	NaN	NaN	0.7905	NaN	0.9032	0.8550	0.9522	0.8455	0.9041	NaN	NaN	0.9025	NaN	NaN	NaN	NaN	1.2609	1.1566	1.1256	0.9872	NaN	NaN	NaN	NaN	NaN	NaN	0.7488	0.7500	NaN	NaN	NaN	NaN	NaN	0.6142	NaN	NaN	NaN	NaN	NaN	NaN	NaN	NaN	NaN
1104	NaN	NaN	0.9375	NaN	NaN	NaN	NaN	NaN	0.8972	NaN	1.0748	1.0933	1.1260	1.0756	1.0662	NaN	NaN	1.1380	NaN	NaN	NaN	NaN	1.0097	0.8501	0.6244	0.6515	NaN	NaN	NaN	NaN	NaN	NaN	1.2513	1.0414	NaN	NaN	NaN	NaN	NaN	1.4000	NaN	NaN	NaN	NaN	NaN	NaN	NaN	NaN	NaN
1105	NaN	NaN	1.0509	NaN	NaN	NaN	NaN	NaN	1.0457	NaN	1.0444	1.1003	1.0588	0.9377	1.1259	NaN	NaN	0.9638	NaN	NaN	NaN	NaN	0.9927	1.1411	1.2035	1.1485	NaN	NaN	NaN	NaN	NaN	NaN	1.1657	1.1953	NaN	NaN	NaN	NaN	NaN	1.1696	NaN	NaN	NaN	NaN	NaN	NaN	NaN	NaN	NaN
1106	NaN	NaN	0.9718	NaN	NaN	NaN	NaN	NaN	1.2361	NaN	0.9474	1.0770	1.4737	0.9876	1.1977	NaN	NaN	0.8861	NaN	NaN	NaN	NaN	1.1990	1.3539	1.8448	1.3428	NaN	NaN	NaN	NaN	NaN	NaN	1.2222	0.9598	NaN	NaN	NaN	NaN	NaN	0.9461	NaN	NaN	NaN	NaN	NaN	NaN	NaN	NaN	NaN
1107	NaN	NaN	0.8560	NaN	NaN	NaN	NaN	NaN	0.9484	NaN	0.9706	1.0545	0.9120	0.9699	0.9185	NaN	NaN	1.2180	NaN	NaN	NaN	NaN	1.0606	0.6967	0.9599	1.0024	NaN	NaN	NaN	NaN	NaN	NaN	1.1031	1.0692	NaN	NaN	NaN	NaN	NaN	0.9579	NaN	NaN	NaN	NaN	NaN	NaN	NaN	NaN	NaN
1108	NaN	NaN	1.0340	NaN	NaN	NaN	NaN	NaN	1.1463	NaN	0.9588	1.0004	0.9996	0.9938	1.0973	NaN	NaN	0.9546	NaN	NaN	NaN	NaN	0.8906	0.8857	0.9393	0.8185	NaN	NaN	NaN	NaN	NaN	NaN	0.9567	1.2776	NaN	NaN	NaN	NaN	NaN	1.0884	NaN	NaN	NaN	NaN	NaN	NaN	NaN	NaN	NaN
1109	NaN	NaN	1.1650	NaN	NaN	NaN	NaN	NaN	1.1096	NaN	1.1790	1.0148	1.3040	0.9066	0.9612	NaN	NaN	1.1210	NaN	NaN	NaN	NaN	0.6302	1.0752	0.8870	1.0248	NaN	NaN	NaN	NaN	NaN	NaN	0.9310	1.0716	NaN	NaN	NaN	NaN	NaN	0.7867	NaN	NaN	NaN	NaN	NaN	NaN	NaN	NaN	NaN
1110	NaN	NaN	1.0200	NaN	NaN	NaN	NaN	NaN	0.9283	NaN	0.9933	0.9551	1.0283	0.9066	0.9365	NaN	NaN	0.9830	NaN	NaN	NaN	NaN	0.7699	0.9200	0.9163	0.9419	NaN	NaN	NaN	NaN	NaN	NaN	1.3078	1.2395	NaN	NaN	NaN	NaN	NaN	1.2688	NaN	NaN	NaN	NaN	NaN	NaN	NaN	NaN	NaN
1111	NaN	NaN	0.8870	NaN	NaN	NaN	NaN	NaN	1.0002	NaN	0.9102	1.1290	1.1437	1.0001	1.2266	NaN	NaN	0.9943	NaN	NaN	NaN	NaN	1.1558	1.2014	1.0870	1.1244	NaN	NaN	NaN	NaN	NaN	NaN	1.1665	1.1547	NaN	NaN	NaN	NaN	NaN	1.1726	NaN	NaN	NaN	NaN	NaN	NaN	NaN	NaN	NaN
1112	NaN	NaN	0.9794	NaN	NaN	NaN	NaN	NaN	1.4671	NaN	0.9227	1.1666	1.2096	1.1487	1.3900	NaN	NaN	0.9561	NaN	NaN	NaN	NaN	1.2866	0.9922	0.9090	0.9322	NaN	NaN	NaN	NaN	NaN	NaN	1.0637	1.1054	NaN	NaN	NaN	NaN	NaN	1.1106	NaN	NaN	NaN	NaN	NaN	NaN	NaN	NaN	NaN
1113	NaN	NaN	1.0954	NaN	NaN	NaN	NaN	NaN	1.1614	NaN	1.0579	1.0882	1.0528	1.0235	1.3337	NaN	NaN	0.6858	NaN	NaN	NaN	NaN	0.8097	1.0664	1.0033	1.0963	NaN	NaN	NaN	NaN	NaN	NaN	1.4024	1.1497	NaN	NaN	NaN	NaN	NaN	1.3653	NaN	NaN	NaN	NaN	NaN	NaN	NaN	NaN	NaN
1114	NaN	NaN	1.0492	NaN	NaN	NaN	NaN	NaN	0.6739	NaN	1.0524	0.7523	0.7651	0.7779	1.1517	NaN	NaN	0.8123	NaN	NaN	NaN	NaN	0.8508	1.5166	1.2658	1.0472	NaN	NaN	NaN	NaN	NaN	NaN	0.7771	0.7650	NaN	NaN	NaN	NaN	NaN	0.7388	NaN	NaN	NaN	NaN	NaN	NaN	NaN	NaN	NaN
1115	NaN	NaN	1.0047	NaN	NaN	NaN	NaN	NaN	1.2422	NaN	0.9537	1.1609	1.2472	1.0645	0.9735	NaN	NaN	1.0643	NaN	NaN	NaN	NaN	0.9664	0.8188	0.5554	0.8674	NaN	NaN	NaN	NaN	NaN	NaN	0.7426	0.8171	NaN	NaN	NaN	NaN	NaN	0.9478	NaN	NaN	NaN	NaN	NaN	NaN	NaN	NaN	NaN
1116	NaN	NaN	1.1087	NaN	NaN	NaN	NaN	NaN	0.9339	NaN	1.1470	1.0817	1.0741	1.0361	1.3041	NaN	NaN	1.1677	NaN	NaN	NaN	NaN	0.9105	1.3872	1.3808	1.1504	NaN	NaN	NaN	NaN	NaN	NaN	1.2276	1.1129	NaN	NaN	NaN	NaN	NaN	1.3047	NaN	NaN	NaN	NaN	NaN	NaN	NaN	NaN	NaN
1117	NaN	NaN	0.9525	NaN	NaN	NaN	NaN	NaN	1.1262	NaN	0.9563	1.0023	1.0149	1.0144	0.9442	NaN	NaN	1.1212	NaN	NaN	NaN	NaN	1.0112	0.9610	0.7073	0.8686	NaN	NaN	NaN	NaN	NaN	NaN	1.1809	1.1040	NaN	NaN	NaN	NaN	NaN	1.2104	NaN	NaN	NaN	NaN	NaN	NaN	NaN	NaN	NaN
1118	NaN	NaN	0.9420	NaN	NaN	NaN	NaN	NaN	1.1757	NaN	1.1293	1.0771	0.9766	0.9898	1.0575	NaN	NaN	1.0926	NaN	NaN	NaN	NaN	0.6858	0.8478	0.8614	0.9015	NaN	NaN	NaN	NaN	NaN	NaN	1.1198	0.9257	NaN	NaN	NaN	NaN	NaN	1.0632	NaN	NaN	NaN	NaN	NaN	NaN	NaN	NaN	NaN
1119	NaN	NaN	0.9765	NaN	NaN	NaN	NaN	NaN	1.0989	NaN	0.9126	0.8504	1.0394	0.8981	1.0332	NaN	NaN	0.9475	NaN	NaN	NaN	NaN	1.1180	0.7671	0.8739	1.1222	NaN	NaN	NaN	NaN	NaN	NaN	1.1560	1.2609	NaN	NaN	NaN	NaN	NaN	1.4195	NaN	NaN	NaN	NaN	NaN	NaN	NaN	NaN	NaN
1120	NaN	NaN	1.1252	NaN	NaN	NaN	NaN	NaN	1.2094	NaN	1.0693	1.0494	1.4133	1.0609	1.2330	NaN	NaN	0.7887	NaN	NaN	NaN	NaN	1.0080	1.0946	0.9676	1.0856	NaN	NaN	NaN	NaN	NaN	NaN	1.1053	1.0687	NaN	NaN	NaN	NaN	NaN	0.9427	NaN	NaN	NaN	NaN	NaN	NaN	NaN	NaN	NaN
1121	NaN	NaN	1.1504	NaN	NaN	NaN	NaN	NaN	0.8443	NaN	1.0129	0.8339	1.1150	0.8689	1.2047	NaN	NaN	0.6332	NaN	NaN	NaN	NaN	0.8826	1.0564	1.2770	1.0066	NaN	NaN	NaN	NaN	NaN	NaN	1.0036	0.9722	NaN	NaN	NaN	NaN	NaN	1.0709	NaN	NaN	NaN	NaN	NaN	NaN	NaN	NaN	NaN
1122	NaN	NaN	1.0488	NaN	NaN	NaN	NaN	NaN	0.9254	NaN	0.9734	1.1203	1.0782	1.1294	1.0315	NaN	NaN	1.2874	NaN	NaN	NaN	NaN	1.0089	1.0721	0.8534	0.9106	NaN	NaN	NaN	NaN	NaN	NaN	1.3260	1.1794	NaN	NaN	NaN	NaN	NaN	1.5900	NaN	NaN	NaN	NaN	NaN	NaN	NaN	NaN	NaN
1123	NaN	NaN	0.9154	NaN	NaN	NaN	NaN	NaN	0.7792	NaN	0.8279	0.8490	0.8426	0.9298	0.6614	NaN	NaN	1.0404	NaN	NaN	NaN	NaN	1.3927	0.5644	0.6068	0.6232	NaN	NaN	NaN	NaN	NaN	NaN	0.7808	0.7643	NaN	NaN	NaN	NaN	NaN	0.7930	NaN	NaN	NaN	NaN	NaN	NaN	NaN	NaN	NaN
1124	NaN	NaN	1.0894	NaN	NaN	NaN	NaN	NaN	1.1029	NaN	1.0473	1.0273	1.1068	1.0365	0.8504	NaN	NaN	0.9261	NaN	NaN	NaN	NaN	1.0930	0.9666	0.9363	1.1830	NaN	NaN	NaN	NaN	NaN	NaN	1.0085	0.9088	NaN	NaN	NaN	NaN	NaN	0.8321	NaN	NaN	NaN	NaN	NaN	NaN	NaN	NaN	NaN
1125	NaN	NaN	1.0480	NaN	NaN	NaN	NaN	NaN	1.2461	NaN	1.0598	1.0942	1.1439	1.1708	1.0825	NaN	NaN	1.0441	NaN	NaN	NaN	NaN	1.0711	1.0733	1.2209	1.3234	NaN	NaN	NaN	NaN	NaN	NaN	1.0920	1.1014	NaN	NaN	NaN	NaN	NaN	1.1414	NaN	NaN	NaN	NaN	NaN	NaN	NaN	NaN	NaN
1126	NaN	NaN	0.7097	NaN	NaN	NaN	NaN	NaN	0.8039	NaN	0.5969	0.6921	0.8726	0.7425	1.0590	NaN	NaN	0.5531	NaN	NaN	NaN	NaN	0.9959	0.9652	1.0228	0.9797	NaN	NaN	NaN	NaN	NaN	NaN	0.3004	0.6324	NaN	NaN	NaN	NaN	NaN	0.4343	NaN	NaN	NaN	NaN	NaN	NaN	NaN	NaN	NaN
1127	NaN	NaN	1.0207	NaN	NaN	NaN	NaN	NaN	0.8295	NaN	1.0037	0.8741	0.7583	0.8792	1.1471	NaN	NaN	0.8334	NaN	NaN	NaN	NaN	1.0140	1.1155	1.0579	0.8115	NaN	NaN	NaN	NaN	NaN	NaN	1.4227	1.2446	NaN	NaN	NaN	NaN	NaN	1.5823	NaN	NaN	NaN	NaN	NaN	NaN	NaN	NaN	NaN
1128	NaN	NaN	1.0792	NaN	NaN	NaN	NaN	NaN	1.0695	NaN	1.1483	1.0842	0.9814	1.1090	1.1108	NaN	NaN	1.0853	NaN	NaN	NaN	NaN	0.6303	0.9437	0.8048	1.0995	NaN	NaN	NaN	NaN	NaN	NaN	1.1120	1.0777	NaN	NaN	NaN	NaN	NaN	1.4712	NaN	NaN	NaN	NaN	NaN	NaN	NaN	NaN	NaN
1129	NaN	NaN	1.0742	NaN	NaN	NaN	NaN	NaN	1.1498	NaN	1.0570	0.9891	1.0459	1.0448	0.8986	NaN	NaN	1.2479	NaN	NaN	NaN	NaN	1.3698	0.8248	0.8962	0.9671	NaN	NaN	NaN	NaN	NaN	NaN	1.2432	1.2296	NaN	NaN	NaN	NaN	NaN	1.4591	NaN	NaN	NaN	NaN	NaN	NaN	NaN	NaN	NaN
1130	NaN	NaN	1.0170	NaN	NaN	NaN	NaN	NaN	0.9202	NaN	0.9948	0.9074	0.9724	0.9391	1.2383	NaN	NaN	0.8853	NaN	NaN	NaN	NaN	1.1644	1.2291	1.3856	1.4397	NaN	NaN	NaN	NaN	NaN	NaN	0.6927	0.9676	NaN	NaN	NaN	NaN	NaN	0.6367	NaN	NaN	NaN	NaN	NaN	NaN	NaN	NaN	NaN
1131	NaN	NaN	0.8408	NaN	NaN	NaN	NaN	NaN	1.1483	NaN	0.8524	0.9380	1.0546	0.9600	1.1284	NaN	NaN	1.0487	NaN	NaN	NaN	NaN	1.1956	0.8352	0.8248	0.7498	NaN	NaN	NaN	NaN	NaN	NaN	0.8468	0.8549	NaN	NaN	NaN	NaN	NaN	0.7677	NaN	NaN	NaN	NaN	NaN	NaN	NaN	NaN	NaN
1132	NaN	NaN	1.0024	NaN	NaN	NaN	NaN	NaN	0.9260	NaN	1.1227	0.8825	0.9667	0.8798	1.0604	NaN	NaN	0.8033	NaN	NaN	NaN	NaN	0.9009	0.9046	0.9969	1.0035	NaN	NaN	NaN	NaN	NaN	NaN	0.7281	0.9881	NaN	NaN	NaN	NaN	NaN	0.9546	NaN	NaN	NaN	NaN	NaN	NaN	NaN	NaN	NaN
1133	NaN	NaN	1.0967	NaN	NaN	NaN	NaN	NaN	0.7652	NaN	1.0089	0.7740	0.7570	0.7553	0.9742	NaN	NaN	0.8424	NaN	NaN	NaN	NaN	0.7877	0.8576	0.8941	0.8954	NaN	NaN	NaN	NaN	NaN	NaN	1.1618	0.9757	NaN	NaN	NaN	NaN	NaN	1.2389	NaN	NaN	NaN	NaN	NaN	NaN	NaN	NaN	NaN
1134	NaN	NaN	1.0073	NaN	NaN	NaN	NaN	NaN	0.9313	NaN	0.9917	0.9449	1.0006	0.9322	1.0272	NaN	NaN	0.6912	NaN	NaN	NaN	NaN	0.9087	1.1373	1.1780	1.1647	NaN	NaN	NaN	NaN	NaN	NaN	1.0600	1.0636	NaN	NaN	NaN	NaN	NaN	1.2253	NaN	NaN	NaN	NaN	NaN	NaN	NaN	NaN	NaN
1135	NaN	NaN	1.0042	NaN	NaN	NaN	NaN	NaN	0.8826	NaN	0.9785	0.9289	0.9551	1.0024	0.9823	NaN	NaN	1.0313	NaN	NaN	NaN	NaN	1.0573	0.9561	1.0224	1.2668	NaN	NaN	NaN	NaN	NaN	NaN	0.5428	0.8118	NaN	NaN	NaN	NaN	NaN	0.5628	NaN	NaN	NaN	NaN	NaN	NaN	NaN	NaN	NaN
1136	NaN	NaN	1.0696	NaN	NaN	NaN	NaN	NaN	1.0163	NaN	1.1230	0.9275	0.9792	0.9853	0.9154	NaN	NaN	1.2140	NaN	NaN	NaN	NaN	1.0649	1.1561	1.0553	1.1083	NaN	NaN	NaN	NaN	NaN	NaN	1.0194	1.0361	NaN	NaN	NaN	NaN	NaN	1.0956	NaN	NaN	NaN	NaN	NaN	NaN	NaN	NaN	NaN
1137	NaN	NaN	0.9744	NaN	NaN	NaN	NaN	NaN	0.9545	NaN	0.9209	0.9814	1.0262	1.0798	0.9070	NaN	NaN	1.0074	NaN	NaN	NaN	NaN	1.0414	0.8321	0.7945	0.9336	NaN	NaN	NaN	NaN	NaN	NaN	1.3274	1.0552	NaN	NaN	NaN	NaN	NaN	1.0084	NaN	NaN	NaN	NaN	NaN	NaN	NaN	NaN	NaN
1138	NaN	NaN	0.9295	NaN	NaN	NaN	NaN	NaN	1.2044	NaN	0.9335	1.0391	1.1053	0.9875	0.9461	NaN	NaN	0.9586	NaN	NaN	NaN	NaN	0.7480	0.9695	1.1653	1.0092	NaN	NaN	NaN	NaN	NaN	NaN	1.3468	1.1308	NaN	NaN	NaN	NaN	NaN	1.3429	NaN	NaN	NaN	NaN	NaN	NaN	NaN	NaN	NaN
1139	NaN	NaN	1.0155	NaN	NaN	NaN	NaN	NaN	0.8548	NaN	0.9652	0.9050	1.0209	0.9743	0.8674	NaN	NaN	0.9501	NaN	NaN	NaN	NaN	1.2048	0.9501	0.8877	0.9255	NaN	NaN	NaN	NaN	NaN	NaN	0.9438	0.9212	NaN	NaN	NaN	NaN	NaN	1.0842	NaN	NaN	NaN	NaN	NaN	NaN	NaN	NaN	NaN
1140	NaN	NaN	0.9857	NaN	NaN	NaN	NaN	NaN	0.8010	NaN	0.9303	0.9335	0.9938	0.9828	0.9057	NaN	NaN	1.1229	NaN	NaN	NaN	NaN	1.2734	0.8006	0.6953	0.8742	NaN	NaN	NaN	NaN	NaN	NaN	0.3619	0.6661	NaN	NaN	NaN	NaN	NaN	0.5227	NaN	NaN	NaN	NaN	NaN	NaN	NaN	NaN	NaN
1141	NaN	NaN	1.0238	NaN	NaN	NaN	NaN	NaN	0.8876	NaN	1.0179	0.8983	0.9565	0.9533	0.7866	NaN	NaN	0.9671	NaN	NaN	NaN	NaN	1.0997	0.9148	1.0197	0.8800	NaN	NaN	NaN	NaN	NaN	NaN	0.9049	1.0396	NaN	NaN	NaN	NaN	NaN	0.7763	NaN	NaN	NaN	NaN	NaN	NaN	NaN	NaN	NaN
1142	NaN	NaN	1.0679	NaN	NaN	NaN	NaN	NaN	0.9632	NaN	1.1430	0.9499	0.9893	0.9235	1.1353	NaN	NaN	0.7583	NaN	NaN	NaN	NaN	0.7937	1.1012	1.4372	1.1265	NaN	NaN	NaN	NaN	NaN	NaN	1.1461	0.7902	NaN	NaN	NaN	NaN	NaN	0.6998	NaN	NaN	NaN	NaN	NaN	NaN	NaN	NaN	NaN
1143	NaN	NaN	0.9426	NaN	NaN	NaN	NaN	NaN	0.9269	NaN	0.9149	0.9150	1.1338	0.9182	1.0933	NaN	NaN	0.9079	NaN	NaN	NaN	NaN	0.8571	1.0300	0.9389	1.0433	NaN	NaN	NaN	NaN	NaN	NaN	0.9987	1.0339	NaN	NaN	NaN	NaN	NaN	1.2107	NaN	NaN	NaN	NaN	NaN	NaN	NaN	NaN	NaN
1144	NaN	NaN	1.0564	NaN	NaN	NaN	NaN	NaN	0.8506	NaN	0.9384	0.8974	0.9863	0.9601	0.9895	NaN	NaN	0.9835	NaN	NaN	NaN	NaN	0.9961	1.0549	0.8753	0.9574	NaN	NaN	NaN	NaN	NaN	NaN	0.7170	0.8550	NaN	NaN	NaN	NaN	NaN	1.0356	NaN	NaN	NaN	NaN	NaN	NaN	NaN	NaN	NaN
1145	NaN	NaN	0.9644	NaN	NaN	NaN	NaN	NaN	0.8599	NaN	0.9292	0.8337	0.9425	0.9001	0.9252	NaN	NaN	1.0456	NaN	NaN	NaN	NaN	0.9127	1.0103	0.8059	0.8998	NaN	NaN	NaN	NaN	NaN	NaN	0.4946	0.9958	NaN	NaN	NaN	NaN	NaN	0.5553	NaN	NaN	NaN	NaN	NaN	NaN	NaN	NaN	NaN
1146	NaN	NaN	1.0393	NaN	NaN	NaN	NaN	NaN	0.9263	NaN	1.0599	0.8596	0.8730	0.9084	1.1856	NaN	NaN	0.7777	NaN	NaN	NaN	NaN	1.1507	1.1658	1.1722	1.1571	NaN	NaN	NaN	NaN	NaN	NaN	0.7049	0.7922	NaN	NaN	NaN	NaN	NaN	0.6214	NaN	NaN	NaN	NaN	NaN	NaN	NaN	NaN	NaN
1147	NaN	NaN	0.9461	NaN	NaN	NaN	NaN	NaN	1.0365	NaN	1.0554	1.0806	1.1284	1.1342	0.8546	NaN	NaN	1.0764	NaN	NaN	NaN	NaN	1.2377	0.7927	0.9561	0.9085	NaN	NaN	NaN	NaN	NaN	NaN	1.0708	1.1978	NaN	NaN	NaN	NaN	NaN	1.1562	NaN	NaN	NaN	NaN	NaN	NaN	NaN	NaN	NaN
1148	NaN	NaN	1.0464	NaN	NaN	NaN	NaN	NaN	0.8250	NaN	0.9932	0.9082	1.0829	0.9279	0.7007	NaN	NaN	0.9403	NaN	NaN	NaN	NaN	0.9137	0.9046	0.9309	0.8352	NaN	NaN	NaN	NaN	NaN	NaN	0.8748	0.7581	NaN	NaN	NaN	NaN	NaN	0.8438	NaN	NaN	NaN	NaN	NaN	NaN	NaN	NaN	NaN
1149	NaN	NaN	1.1492	NaN	NaN	NaN	NaN	NaN	0.9901	NaN	1.2152	1.0033	1.2526	0.9591	1.1935	NaN	NaN	1.0304	NaN	NaN	NaN	NaN	0.9575	1.2990	1.2781	1.1107	NaN	NaN	NaN	NaN	NaN	NaN	1.2091	1.0595	NaN	NaN	NaN	NaN	NaN	0.8842	NaN	NaN	NaN	NaN	NaN	NaN	NaN	NaN	NaN
1150	NaN	NaN	0.8722	NaN	NaN	NaN	NaN	NaN	0.8562	NaN	0.7827	0.8185	0.7455	0.9567	0.8575	NaN	NaN	0.8384	NaN	NaN	NaN	NaN	1.0696	0.8610	0.9622	1.0387	NaN	NaN	NaN	NaN	NaN	NaN	0.8749	1.0079	NaN	NaN	NaN	NaN	NaN	0.8633	NaN	NaN	NaN	NaN	NaN	NaN	NaN	NaN	NaN
1151	NaN	NaN	0.9850	NaN	NaN	NaN	NaN	NaN	0.6710	NaN	1.0459	0.7372	0.8665	0.6823	1.0378	NaN	NaN	0.9401	NaN	NaN	NaN	NaN	0.9770	1.0876	1.2577	1.1400	NaN	NaN	NaN	NaN	NaN	NaN	1.0324	1.1559	NaN	NaN	NaN	NaN	NaN	1.0039	NaN	NaN	NaN	NaN	NaN	NaN	NaN	NaN	NaN
1152	NaN	NaN	0.7200	NaN	NaN	NaN	NaN	NaN	1.0167	NaN	0.6764	1.0390	1.1561	1.0430	0.8488	NaN	NaN	0.9842	NaN	NaN	NaN	NaN	1.1599	0.7266	0.8268	0.9125	NaN	NaN	NaN	NaN	NaN	NaN	1.0212	1.1902	NaN	NaN	NaN	NaN	NaN	1.1817	NaN	NaN	NaN	NaN	NaN	NaN	NaN	NaN	NaN
1153	NaN	NaN	1.0574	NaN	NaN	NaN	NaN	NaN	0.9046	1.0326	1.0721	1.0204	0.8857	0.9832	0.8454	NaN	NaN	0.9463	NaN	NaN	NaN	NaN	0.9639	0.9222	0.7845	0.9430	NaN	NaN	NaN	NaN	NaN	NaN	0.9715	1.3889	NaN	NaN	NaN	NaN	NaN	1.2721	NaN	NaN	NaN	NaN	NaN	NaN	NaN	NaN	NaN
1154	NaN	NaN	1.1732	NaN	NaN	NaN	NaN	NaN	0.8994	0.9774	1.0328	0.8863	0.9288	0.9330	1.0980	NaN	NaN	0.9420	NaN	NaN	NaN	NaN	0.9998	1.1313	1.1299	1.0774	NaN	NaN	NaN	NaN	NaN	NaN	0.7203	0.8771	NaN	NaN	NaN	NaN	NaN	1.2103	NaN	NaN	NaN	NaN	NaN	NaN	NaN	NaN	NaN
1155	NaN	NaN	1.0324	NaN	NaN	NaN	NaN	NaN	0.9587	1.0722	1.1144	0.9285	0.9488	0.9275	0.8409	NaN	NaN	1.0270	NaN	NaN	NaN	NaN	0.8797	0.9567	0.9846	0.8635	NaN	NaN	NaN	NaN	0.8879	NaN	0.5947	0.6685	NaN	NaN	NaN	NaN	NaN	0.6518	NaN	NaN	NaN	NaN	NaN	NaN	NaN	NaN	NaN
1156	NaN	NaN	0.6823	NaN	NaN	NaN	NaN	NaN	0.9829	1.0261	0.5463	0.9282	0.9769	1.0050	0.6575	NaN	NaN	0.7616	NaN	NaN	NaN	NaN	1.1764	0.8316	1.0513	0.9477	NaN	NaN	NaN	NaN	1.0676	NaN	0.9368	1.1868	NaN	NaN	NaN	NaN	NaN	1.1867	NaN	NaN	NaN	NaN	NaN	NaN	NaN	NaN	NaN
1157	NaN	NaN	1.0781	NaN	NaN	NaN	NaN	NaN	1.0290	0.9097	1.0873	1.0280	0.9819	0.9584	1.0228	NaN	NaN	1.1001	NaN	NaN	NaN	NaN	1.0711	0.7182	0.4845	0.9600	NaN	NaN	NaN	NaN	0.7783	NaN	0.8855	1.0738	NaN	NaN	NaN	NaN	NaN	0.9245	NaN	NaN	NaN	NaN	NaN	NaN	NaN	NaN	NaN
1158	NaN	NaN	1.1343	NaN	NaN	NaN	NaN	NaN	0.9459	1.0095	1.1011	0.9740	0.9516	0.9327	0.9661	NaN	NaN	0.8256	NaN	NaN	NaN	NaN	0.8266	1.1828	1.0575	1.0704	NaN	NaN	NaN	NaN	0.8775	NaN	0.7716	0.7861	NaN	NaN	NaN	NaN	NaN	0.8908	NaN	NaN	NaN	NaN	NaN	NaN	NaN	NaN	NaN
1159	NaN	NaN	0.9937	NaN	NaN	NaN	NaN	NaN	1.2054	0.9624	1.2164	1.3165	1.2971	1.2490	1.0933	NaN	NaN	1.1611	NaN	NaN	NaN	NaN	0.6729	1.0697	0.9817	1.0846	NaN	NaN	NaN	NaN	1.6004	NaN	0.9445	1.0150	NaN	NaN	NaN	NaN	NaN	0.9098	NaN	NaN	NaN	NaN	NaN	NaN	NaN	NaN	NaN
1160	NaN	NaN	1.0535	NaN	NaN	NaN	NaN	NaN	1.0829	1.1608	0.9982	0.9046	0.9238	0.9962	0.9187	NaN	NaN	0.9646	NaN	NaN	NaN	NaN	1.0994	1.1763	1.1701	1.1532	NaN	NaN	NaN	NaN	1.3268	NaN	1.0869	1.0465	NaN	NaN	NaN	NaN	NaN	1.0629	NaN	NaN	NaN	NaN	NaN	NaN	NaN	NaN	NaN
1161	NaN	NaN	0.9620	NaN	NaN	NaN	NaN	NaN	0.8619	1.0782	0.9969	0.8853	0.9959	1.0146	0.9967	NaN	NaN	1.0877	NaN	NaN	NaN	NaN	1.4241	0.9179	1.0257	0.9767	NaN	NaN	NaN	NaN	1.1427	NaN	0.6063	0.8046	NaN	NaN	NaN	NaN	NaN	0.6251	NaN	NaN	NaN	NaN	NaN	NaN	NaN	NaN	NaN
1162	NaN	NaN	0.8891	NaN	NaN	NaN	NaN	NaN	0.8209	0.9582	0.8630	0.8971	1.0496	0.8857	0.9779	NaN	NaN	0.9257	NaN	NaN	NaN	NaN	1.0140	0.9818	0.8963	0.9103	NaN	NaN	NaN	NaN	0.7247	NaN	1.1486	1.0818	NaN	NaN	NaN	NaN	NaN	1.1281	NaN	NaN	NaN	NaN	NaN	NaN	NaN	NaN	NaN
1163	NaN	NaN	1.0588	NaN	NaN	NaN	NaN	NaN	1.2160	0.9777	1.1687	1.1951	1.0888	1.1364	1.0673	NaN	NaN	1.1153	NaN	NaN	NaN	NaN	1.0223	1.0430	1.4047	0.9035	NaN	NaN	NaN	NaN	0.8612	NaN	0.7558	1.0508	NaN	NaN	NaN	NaN	NaN	0.6487	NaN	NaN	NaN	NaN	NaN	NaN	NaN	NaN	NaN
1164	NaN	NaN	0.9768	NaN	NaN	NaN	NaN	NaN	0.9328	0.8011	0.8797	0.9593	0.9144	0.8349	0.9075	NaN	NaN	0.9896	NaN	NaN	NaN	NaN	0.8444	0.8893	1.0579	0.9644	NaN	NaN	NaN	NaN	0.8360	NaN	0.7084	0.9203	NaN	NaN	NaN	NaN	NaN	0.7153	NaN	NaN	NaN	NaN	NaN	NaN	NaN	NaN	NaN
1165	NaN	NaN	1.1160	NaN	NaN	NaN	NaN	NaN	1.1541	1.1953	1.1304	1.2732	1.2399	1.2423	1.3058	NaN	NaN	1.1285	NaN	NaN	NaN	NaN	1.0484	1.4013	1.3169	1.1103	NaN	NaN	NaN	NaN	0.9201	NaN	0.9651	1.1394	NaN	NaN	NaN	NaN	NaN	1.3139	NaN	NaN	NaN	NaN	NaN	NaN	NaN	NaN	NaN
1166	NaN	NaN	0.9830	NaN	NaN	NaN	NaN	NaN	1.1273	1.0511	1.0337	1.0852	1.1913	0.9636	0.8264	NaN	NaN	1.0473	NaN	NaN	NaN	NaN	1.0143	0.9984	0.9751	0.8287	NaN	NaN	NaN	NaN	1.2101	NaN	1.0304	1.0499	NaN	NaN	NaN	NaN	NaN	1.2254	NaN	NaN	NaN	NaN	NaN	NaN	NaN	NaN	NaN
1167	NaN	NaN	1.1008	NaN	NaN	NaN	NaN	NaN	1.0230	0.9512	1.0682	1.0114	0.9915	1.0342	1.0486	NaN	NaN	1.0576	NaN	NaN	NaN	NaN	0.9210	1.1572	1.0937	0.9667	NaN	NaN	NaN	NaN	1.6660	NaN	1.0504	1.0165	NaN	NaN	NaN	NaN	NaN	1.2715	NaN	NaN	NaN	NaN	NaN	NaN	NaN	NaN	NaN
1168	NaN	NaN	0.8410	NaN	NaN	NaN	NaN	NaN	1.0324	1.1801	0.8357	0.9978	1.1482	1.0805	0.8717	NaN	NaN	0.8012	NaN	NaN	NaN	NaN	1.2161	0.8976	0.6839	0.7382	NaN	NaN	NaN	NaN	0.5975	NaN	0.6995	0.8851	NaN	NaN	NaN	NaN	NaN	1.0476	NaN	NaN	NaN	NaN	NaN	NaN	NaN	NaN	NaN
1169	NaN	NaN	1.0469	NaN	NaN	NaN	NaN	NaN	1.3022	1.1189	1.1316	1.3186	1.3561	1.3307	1.2838	NaN	NaN	1.0331	NaN	NaN	NaN	NaN	1.0727	0.9868	1.0192	1.0609	NaN	NaN	NaN	NaN	1.0323	NaN	1.3474	1.1190	NaN	NaN	NaN	NaN	NaN	1.2880	NaN	NaN	NaN	NaN	NaN	NaN	NaN	NaN	NaN
1170	NaN	NaN	0.8891	NaN	NaN	NaN	NaN	NaN	0.8765	0.9954	0.7816	0.8136	0.6965	0.8699	0.7703	NaN	NaN	0.6762	NaN	NaN	NaN	NaN	1.0473	0.8627	0.7083	0.8656	NaN	NaN	NaN	NaN	0.4814	NaN	0.6004	0.8829	NaN	NaN	NaN	NaN	NaN	0.7785	NaN	NaN	NaN	NaN	NaN	NaN	NaN	NaN	NaN
1171	NaN	NaN	1.1274	NaN	NaN	NaN	NaN	NaN	0.8745	0.8360	1.0527	0.9118	0.9757	0.8231	0.9949	NaN	NaN	1.1036	NaN	NaN	NaN	NaN	1.0672	1.1377	1.0608	1.0076	NaN	NaN	NaN	NaN	1.1421	NaN	0.8928	1.1682	NaN	NaN	NaN	NaN	NaN	1.2062	NaN	NaN	NaN	NaN	NaN	NaN	NaN	NaN	NaN
1172	NaN	NaN	1.0523	NaN	NaN	NaN	NaN	NaN	0.9777	0.9200	1.0205	0.9147	0.9940	0.8769	1.0606	NaN	NaN	1.0095	NaN	NaN	NaN	NaN	0.9826	1.0517	0.9767	1.0566	NaN	NaN	NaN	NaN	0.9442	NaN	0.9438	0.9290	NaN	NaN	NaN	NaN	NaN	0.6892	NaN	NaN	NaN	NaN	NaN	NaN	NaN	NaN	NaN
1173	NaN	NaN	0.8794	NaN	NaN	NaN	NaN	NaN	0.8136	0.8719	1.0212	0.9258	0.9943	0.9198	0.9658	NaN	NaN	1.0762	NaN	NaN	NaN	NaN	1.0515	1.1965	1.1185	1.0367	NaN	NaN	NaN	NaN	1.4712	NaN	1.1516	1.0042	NaN	NaN	NaN	NaN	NaN	1.0699	NaN	NaN	NaN	NaN	NaN	NaN	NaN	NaN	NaN
1174	NaN	NaN	0.9397	NaN	NaN	NaN	NaN	NaN	0.9771	0.8985	0.9719	1.0079	1.0461	1.1289	1.1154	NaN	NaN	0.9811	NaN	NaN	NaN	NaN	1.0914	1.1909	1.0930	1.1326	NaN	NaN	NaN	NaN	1.1604	NaN	0.4550	0.6342	NaN	NaN	NaN	NaN	NaN	0.4812	NaN	NaN	NaN	NaN	NaN	NaN	NaN	NaN	NaN
1175	NaN	NaN	0.8872	NaN	NaN	NaN	NaN	NaN	0.9824	0.9810	0.6449	0.9681	1.0811	0.9978	1.0295	NaN	NaN	1.0011	NaN	NaN	NaN	NaN	1.3570	1.2326	1.1542	1.1013	NaN	NaN	NaN	NaN	1.0508	NaN	1.3809	0.8852	NaN	NaN	NaN	NaN	NaN	0.8650	NaN	NaN	NaN	NaN	NaN	NaN	NaN	NaN	NaN
1176	NaN	NaN	0.9733	NaN	NaN	NaN	NaN	NaN	1.0014	1.0991	0.9358	1.0246	0.9820	1.0881	0.6979	NaN	NaN	0.9566	NaN	NaN	NaN	NaN	1.0509	0.8063	0.6695	0.6442	NaN	NaN	NaN	NaN	0.7629	NaN	0.8715	1.1413	NaN	NaN	NaN	NaN	NaN	1.0707	NaN	NaN	NaN	NaN	NaN	NaN	NaN	NaN	NaN
1177	NaN	NaN	1.1195	NaN	NaN	NaN	NaN	NaN	0.8849	0.8814	0.8953	0.7537	0.9007	0.7144	0.7233	NaN	NaN	1.0538	NaN	NaN	NaN	NaN	0.7375	0.8891	0.8704	0.8866	NaN	NaN	NaN	NaN	0.8653	NaN	1.0844	1.0242	NaN	NaN	NaN	NaN	NaN	1.0533	NaN	NaN	NaN	NaN	NaN	NaN	NaN	NaN	NaN
1178	NaN	NaN	1.0484	NaN	NaN	NaN	NaN	NaN	1.1227	0.9130	1.1956	1.2190	1.1587	1.1848	1.2037	NaN	NaN	0.9529	NaN	NaN	NaN	NaN	0.8220	1.1472	1.0870	1.1338	NaN	NaN	NaN	NaN	1.1329	NaN	1.4014	1.3024	NaN	NaN	NaN	NaN	NaN	1.1136	NaN	NaN	NaN	NaN	NaN	NaN	NaN	NaN	NaN
1179	NaN	NaN	1.1018	NaN	NaN	NaN	NaN	NaN	1.2322	1.1886	1.0188	1.0612	1.1764	1.0131	1.0524	NaN	NaN	0.6367	NaN	NaN	NaN	NaN	1.1573	0.8068	0.9244	1.0512	NaN	NaN	NaN	NaN	0.9326	NaN	1.0858	0.9956	NaN	NaN	NaN	NaN	NaN	1.0695	NaN	NaN	NaN	NaN	NaN	NaN	NaN	NaN	NaN
1180	NaN	NaN	0.9315	NaN	NaN	NaN	NaN	NaN	0.9859	1.0960	0.9973	1.0595	1.0598	1.1238	0.8646	NaN	NaN	1.2105	NaN	NaN	NaN	NaN	1.3795	0.7571	0.6922	0.9043	NaN	NaN	NaN	NaN	0.6816	NaN	1.0611	1.0985	NaN	NaN	NaN	NaN	NaN	1.0729	NaN	NaN	NaN	NaN	NaN	NaN	NaN	NaN	NaN
1181	NaN	NaN	1.1609	NaN	NaN	NaN	NaN	NaN	1.2745	1.0729	1.0921	1.0630	1.3658	1.1013	1.2573	NaN	NaN	1.0581	NaN	NaN	NaN	NaN	1.0833	1.4542	1.3921	1.3724	NaN	NaN	NaN	NaN	1.5735	NaN	0.9219	1.1016	NaN	NaN	NaN	NaN	NaN	1.0559	NaN	NaN	NaN	NaN	NaN	NaN	NaN	NaN	NaN
1182	NaN	NaN	0.9605	NaN	NaN	NaN	NaN	NaN	1.0096	1.1988	0.9138	1.0419	1.1103	1.1458	0.7974	NaN	NaN	0.8697	NaN	NaN	NaN	NaN	1.3767	0.9428	0.8647	0.7969	NaN	NaN	NaN	NaN	1.3105	NaN	1.3023	1.0731	NaN	NaN	NaN	NaN	NaN	1.1087	NaN	NaN	NaN	NaN	NaN	NaN	NaN	NaN	NaN
1183	NaN	NaN	0.7544	NaN	NaN	NaN	NaN	NaN	0.7365	0.8343	0.7940	0.7393	0.7855	0.7647	0.7316	NaN	NaN	1.0430	NaN	NaN	NaN	NaN	1.0289	0.8343	0.7866	0.7431	NaN	NaN	NaN	NaN	0.6079	NaN	0.3610	0.6058	NaN	NaN	NaN	NaN	NaN	0.5420	NaN	NaN	NaN	NaN	NaN	NaN	NaN	NaN	NaN
1184	NaN	NaN	1.0549	NaN	NaN	NaN	NaN	NaN	1.1052	1.1044	1.1692	1.1024	1.1223	1.0551	1.1384	NaN	NaN	1.1813	NaN	NaN	NaN	NaN	1.1457	1.0266	0.8767	0.9379	NaN	NaN	NaN	NaN	0.8225	NaN	0.9456	1.1677	NaN	NaN	NaN	NaN	NaN	1.0694	NaN	NaN	NaN	NaN	NaN	NaN	NaN	NaN	NaN
1185	NaN	NaN	1.0397	NaN	NaN	NaN	NaN	NaN	0.7698	0.7942	0.9106	0.8245	0.8029	0.8166	1.0278	NaN	NaN	0.9923	NaN	NaN	NaN	NaN	0.9688	1.1673	1.1760	1.1776	NaN	NaN	NaN	NaN	0.8589	NaN	0.6533	0.9669	NaN	NaN	NaN	NaN	NaN	0.5888	NaN	NaN	NaN	NaN	NaN	NaN	NaN	NaN	NaN
1186	NaN	NaN	1.1193	NaN	NaN	NaN	NaN	NaN	1.1631	1.0246	1.1583	0.9286	0.9116	0.8253	1.1931	NaN	NaN	0.8421	NaN	NaN	NaN	NaN	0.9168	1.0792	1.1688	1.1720	NaN	NaN	NaN	NaN	1.4303	NaN	1.1085	0.9446	NaN	NaN	NaN	NaN	NaN	1.2716	NaN	NaN	NaN	NaN	NaN	NaN	NaN	NaN	NaN
1187	NaN	NaN	0.9488	NaN	NaN	NaN	NaN	NaN	0.9556	0.9210	0.8840	0.9958	0.9493	1.1393	0.6849	NaN	NaN	0.9917	NaN	NaN	NaN	NaN	0.9441	0.7889	0.8356	0.8917	NaN	NaN	NaN	NaN	1.2928	NaN	0.8104	0.9592	NaN	NaN	NaN	NaN	NaN	0.7259	NaN	NaN	NaN	NaN	NaN	NaN	NaN	NaN	NaN
1188	NaN	NaN	1.0658	NaN	NaN	NaN	NaN	NaN	1.1234	1.1547	1.1579	1.2073	1.1003	1.2857	1.1229	NaN	NaN	0.9795	NaN	NaN	NaN	NaN	1.0207	1.1996	1.3531	1.3103	NaN	NaN	NaN	NaN	1.2654	NaN	1.3524	1.1817	NaN	NaN	NaN	NaN	NaN	1.3241	NaN	NaN	NaN	NaN	NaN	NaN	NaN	NaN	NaN
1189	NaN	NaN	1.0336	NaN	NaN	NaN	NaN	NaN	1.1251	1.0590	1.0089	1.1353	1.1181	1.1749	0.8669	NaN	NaN	1.0641	NaN	NaN	NaN	NaN	1.1980	0.9667	0.9515	0.9692	NaN	NaN	NaN	NaN	0.7518	NaN	0.7773	0.7909	NaN	NaN	NaN	NaN	NaN	0.8826	NaN	NaN	NaN	NaN	NaN	NaN	NaN	NaN	NaN
1190	NaN	NaN	0.9927	NaN	NaN	NaN	NaN	NaN	1.0980	1.1762	1.0039	1.1715	1.1681	1.1390	0.9701	NaN	NaN	1.0454	NaN	NaN	NaN	NaN	1.3013	1.2250	0.8057	1.1545	NaN	NaN	NaN	NaN	0.6294	NaN	0.9478	1.1354	NaN	NaN	NaN	NaN	NaN	0.9614	NaN	NaN	NaN	NaN	NaN	NaN	NaN	NaN	NaN
1191	NaN	NaN	1.0276	NaN	NaN	NaN	NaN	NaN	0.9499	1.0227	1.0557	0.9506	1.0286	0.8724	1.0561	NaN	NaN	1.0927	NaN	NaN	NaN	NaN	0.7965	0.9783	0.8442	0.9515	NaN	NaN	NaN	NaN	0.6710	NaN	0.8079	0.9469	NaN	NaN	NaN	NaN	NaN	0.9086	NaN	NaN	NaN	NaN	NaN	NaN	NaN	NaN	NaN
1192	NaN	NaN	0.9908	NaN	NaN	NaN	NaN	NaN	1.0482	1.0428	0.9092	1.1210	1.0759	1.0424	1.1579	NaN	NaN	0.9758	NaN	NaN	NaN	NaN	0.9253	1.3055	1.0536	1.2508	NaN	NaN	NaN	NaN	1.0763	NaN	1.1792	1.1350	NaN	NaN	NaN	NaN	NaN	1.3409	NaN	NaN	NaN	NaN	NaN	NaN	NaN	NaN	NaN
1193	NaN	NaN	1.0001	NaN	NaN	NaN	NaN	NaN	1.1956	1.1285	0.9090	1.2040	1.1347	1.3016	1.1243	NaN	NaN	1.0365	NaN	NaN	NaN	NaN	1.2449	1.0197	1.0824	1.1043	NaN	NaN	NaN	NaN	1.0991	NaN	1.0148	0.9409	NaN	NaN	NaN	NaN	NaN	1.2681	NaN	NaN	NaN	NaN	NaN	NaN	NaN	NaN	NaN
1194	NaN	NaN	1.0079	NaN	NaN	NaN	NaN	NaN	0.9878	0.9845	1.0408	0.9916	1.0139	1.0571	1.0040	NaN	NaN	1.0742	NaN	NaN	NaN	NaN	1.0217	1.1230	0.9392	0.9422	NaN	NaN	NaN	NaN	0.7985	NaN	0.7962	0.9695	NaN	NaN	NaN	NaN	NaN	0.8066	NaN	NaN	NaN	NaN	NaN	NaN	NaN	NaN	NaN
1195	NaN	NaN	1.0722	NaN	NaN	NaN	NaN	NaN	1.1469	1.0497	1.0752	1.0558	1.1012	1.1920	1.2133	NaN	NaN	1.2036	NaN	NaN	NaN	NaN	1.1886	0.9798	0.9965	0.9947	NaN	NaN	NaN	NaN	1.2756	NaN	1.2570	1.2982	NaN	NaN	NaN	NaN	NaN	1.5102	NaN	NaN	NaN	NaN	NaN	NaN	NaN	NaN	NaN
1196	NaN	NaN	0.8481	NaN	NaN	NaN	NaN	NaN	0.7734	0.8134	0.9524	0.7128	0.7567	0.8161	0.8029	NaN	NaN	0.8477	NaN	NaN	NaN	NaN	0.8344	0.9644	1.0345	0.8963	NaN	NaN	NaN	NaN	1.1573	NaN	1.1959	1.1905	NaN	NaN	NaN	NaN	NaN	1.1940	NaN	NaN	NaN	NaN	NaN	NaN	NaN	NaN	NaN
1197	NaN	NaN	1.0223	NaN	NaN	NaN	NaN	NaN	0.9863	1.0612	0.9375	1.0865	1.2061	1.1210	1.0804	NaN	NaN	1.1003	NaN	NaN	NaN	NaN	1.1876	1.0265	1.2890	1.0933	NaN	NaN	NaN	NaN	0.9892	NaN	1.1528	1.0992	NaN	NaN	NaN	NaN	NaN	1.0571	NaN	NaN	NaN	NaN	NaN	NaN	NaN	NaN	NaN
1198	NaN	NaN	0.9765	NaN	NaN	NaN	NaN	NaN	0.9454	0.7876	1.0209	0.9574	0.9065	0.8965	0.8629	NaN	NaN	0.9659	NaN	NaN	NaN	NaN	0.9579	0.9218	0.9025	0.7299	NaN	NaN	NaN	NaN	0.7391	NaN	0.7920	0.9306	NaN	NaN	NaN	NaN	NaN	0.7787	NaN	NaN	NaN	NaN	NaN	NaN	NaN	NaN	NaN
1199	NaN	NaN	1.0669	NaN	NaN	NaN	NaN	NaN	0.8827	0.9216	1.0545	1.0061	0.9509	1.0138	1.1536	NaN	NaN	0.9990	NaN	NaN	NaN	NaN	1.0938	0.9320	0.9609	1.1984	NaN	NaN	NaN	NaN	0.8390	NaN	0.8007	0.7656	NaN	NaN	NaN	NaN	NaN	1.0229	NaN	NaN	NaN	NaN	NaN	NaN	NaN	NaN	NaN
1200	NaN	NaN	1.0240	NaN	NaN	NaN	NaN	NaN	0.7993	0.8138	1.1155	0.8326	0.8934	0.8187	0.9810	NaN	NaN	0.9522	NaN	NaN	NaN	NaN	0.8692	1.0163	1.1290	0.9961	NaN	NaN	NaN	NaN	1.6000	NaN	1.2413	1.1488	NaN	NaN	NaN	NaN	NaN	1.2761	NaN	NaN	NaN	NaN	NaN	NaN	NaN	NaN	NaN
1201	NaN	NaN	1.0319	NaN	NaN	NaN	NaN	NaN	1.1096	0.8107	1.0261	1.0259	0.9853	0.9371	0.8767	NaN	NaN	1.0922	NaN	NaN	NaN	NaN	0.8365	0.7961	0.7904	1.0630	NaN	NaN	NaN	NaN	0.5985	NaN	1.2121	0.8070	NaN	NaN	NaN	NaN	NaN	0.5389	NaN	NaN	NaN	NaN	NaN	NaN	NaN	NaN	NaN
1202	NaN	NaN	0.9056	NaN	NaN	NaN	NaN	NaN	0.9900	1.1701	0.8988	0.9979	1.1035	1.0774	1.1149	NaN	NaN	1.0912	NaN	NaN	NaN	NaN	1.1107	1.0721	1.0488	1.0374	NaN	NaN	NaN	NaN	1.4354	NaN	1.6130	1.3398	NaN	NaN	NaN	NaN	NaN	1.5395	NaN	NaN	NaN	NaN	NaN	NaN	NaN	NaN	NaN
1203	NaN	NaN	0.8767	NaN	NaN	NaN	NaN	NaN	1.3179	1.0929	0.9653	1.1512	1.2061	1.1243	1.1802	NaN	NaN	1.0091	NaN	NaN	NaN	NaN	1.1731	0.9081	1.0127	1.1094	NaN	NaN	NaN	NaN	0.7357	NaN	0.9449	1.0185	NaN	NaN	NaN	NaN	NaN	1.0651	NaN	NaN	NaN	NaN	NaN	NaN	NaN	NaN	NaN
1204	NaN	NaN	1.1099	NaN	NaN	NaN	NaN	NaN	1.2415	0.8688	1.0756	1.1745	1.1369	1.1994	1.0690	NaN	NaN	1.2193	NaN	NaN	NaN	NaN	0.8297	1.3058	1.3278	1.0029	NaN	NaN	NaN	NaN	0.8717	NaN	1.3116	1.1160	NaN	NaN	NaN	NaN	NaN	1.2320	NaN	NaN	NaN	NaN	NaN	NaN	NaN	NaN	NaN
1205	NaN	NaN	0.9178	NaN	NaN	NaN	NaN	NaN	1.0466	1.1400	0.9592	1.0317	0.9954	1.0882	1.0420	NaN	NaN	1.0930	NaN	NaN	NaN	NaN	0.9954	0.8314	0.6424	0.8184	NaN	NaN	NaN	NaN	1.0058	NaN	1.3462	1.0415	NaN	NaN	NaN	NaN	NaN	1.3342	NaN	NaN	NaN	NaN	NaN	NaN	NaN	NaN	NaN
1206	NaN	NaN	0.9636	NaN	NaN	NaN	NaN	NaN	0.6772	0.8197	0.8472	0.7845	0.8051	0.9041	0.9192	NaN	NaN	0.9559	NaN	NaN	NaN	NaN	0.8297	0.8894	0.8087	0.6882	NaN	NaN	NaN	NaN	1.0331	NaN	0.5241	0.6455	NaN	NaN	NaN	NaN	NaN	0.5584	NaN	NaN	NaN	NaN	NaN	NaN	NaN	NaN	NaN
1207	NaN	NaN	0.9906	NaN	NaN	NaN	NaN	NaN	0.9037	0.9068	1.0720	0.8534	0.8870	0.8649	1.3838	NaN	NaN	1.1560	NaN	NaN	NaN	NaN	1.0290	1.4056	1.1732	0.8645	NaN	NaN	NaN	NaN	1.4542	NaN	1.1757	0.8613	NaN	NaN	NaN	NaN	NaN	0.7695	NaN	NaN	NaN	NaN	NaN	NaN	NaN	NaN	NaN
1208	NaN	NaN	0.8693	NaN	NaN	NaN	NaN	NaN	1.1046	0.9264	0.9349	1.0623	1.1558	1.0787	0.8587	NaN	NaN	0.9812	NaN	NaN	NaN	NaN	1.0635	0.8206	0.7646	0.9069	NaN	NaN	NaN	NaN	0.7272	NaN	1.0383	1.0261	NaN	NaN	NaN	NaN	NaN	1.2015	NaN	NaN	NaN	NaN	NaN	NaN	NaN	NaN	NaN
1209	NaN	NaN	1.0132	NaN	NaN	NaN	NaN	NaN	1.0998	1.0164	1.1523	1.1049	1.0385	1.1084	1.2412	NaN	NaN	1.0765	NaN	NaN	NaN	NaN	0.9362	1.0673	1.2149	1.1782	NaN	NaN	NaN	NaN	1.3329	NaN	1.2430	1.1220	NaN	NaN	NaN	NaN	NaN	1.0606	NaN	NaN	NaN	NaN	NaN	NaN	NaN	NaN	NaN
1210	NaN	NaN	1.0489	NaN	NaN	NaN	NaN	NaN	0.9388	0.8585	1.0025	0.9288	0.9597	1.0060	1.1138	NaN	NaN	1.0096	NaN	NaN	NaN	NaN	0.9558	1.1646	0.9985	0.9727	NaN	NaN	NaN	NaN	0.6224	NaN	0.6307	1.0320	NaN	NaN	NaN	NaN	NaN	0.8236	NaN	NaN	NaN	NaN	NaN	NaN	NaN	NaN	NaN
1211	NaN	NaN	1.0241	NaN	NaN	NaN	NaN	NaN	1.0042	0.8424	0.9597	1.0523	1.0711	1.0517	0.9422	NaN	NaN	1.1112	NaN	NaN	NaN	NaN	1.1543	1.1007	0.9765	1.1273	NaN	NaN	NaN	NaN	1.0334	NaN	0.8740	0.8528	NaN	NaN	NaN	NaN	NaN	0.7813	NaN	NaN	NaN	NaN	NaN	NaN	NaN	NaN	NaN
1212	NaN	NaN	0.9771	NaN	NaN	NaN	NaN	NaN	1.1598	0.9170	1.0101	1.1422	1.0691	1.1751	0.9346	NaN	NaN	0.9992	NaN	NaN	NaN	NaN	1.1192	0.9823	0.9251	1.0490	NaN	NaN	NaN	NaN	0.9256	NaN	0.7897	0.8049	NaN	NaN	NaN	NaN	NaN	0.7056	NaN	NaN	NaN	NaN	NaN	NaN	NaN	NaN	NaN
1213	NaN	NaN	0.9950	NaN	NaN	NaN	NaN	NaN	0.9138	0.8467	0.9964	0.9404	0.9362	0.9554	0.6915	NaN	NaN	0.9111	NaN	NaN	NaN	NaN	1.0043	0.9046	0.8491	0.8932	NaN	NaN	NaN	NaN	0.9130	NaN	0.6447	0.7884	NaN	NaN	NaN	NaN	NaN	0.7684	NaN	NaN	NaN	NaN	NaN	NaN	NaN	NaN	NaN
1214	NaN	NaN	1.0814	NaN	NaN	NaN	NaN	NaN	0.9967	0.8720	1.1244	0.8818	0.9766	0.8717	1.2254	NaN	NaN	0.8795	NaN	NaN	NaN	NaN	0.9660	1.1482	1.1613	1.1874	NaN	NaN	NaN	NaN	1.6276	NaN	1.5523	1.1404	NaN	NaN	NaN	NaN	NaN	1.3666	NaN	NaN	NaN	NaN	NaN	NaN	NaN	NaN	NaN
1215	NaN	NaN	0.9849	NaN	NaN	NaN	NaN	NaN	0.8044	0.8710	0.8612	0.8343	0.8218	0.8923	0.7556	NaN	NaN	0.8590	NaN	NaN	NaN	NaN	0.9039	1.0159	0.9098	1.0246	NaN	NaN	NaN	NaN	1.1926	NaN	1.1774	1.2004	NaN	NaN	NaN	NaN	NaN	1.0638	NaN	NaN	NaN	NaN	NaN	NaN	NaN	NaN	NaN
1216	NaN	NaN	0.9817	NaN	NaN	NaN	NaN	NaN	1.2335	0.9945	1.0306	1.0778	1.1677	1.0661	0.9653	NaN	NaN	1.0571	NaN	NaN	NaN	NaN	1.2234	0.8869	0.8887	0.9441	NaN	NaN	NaN	NaN	0.9065	NaN	1.4676	1.2697	NaN	NaN	NaN	NaN	NaN	1.3483	NaN	NaN	NaN	NaN	NaN	NaN	NaN	NaN	NaN
1217	NaN	NaN	0.9210	NaN	NaN	NaN	NaN	NaN	0.7749	0.7588	0.8813	0.7317	0.7009	0.7536	0.8102	NaN	NaN	0.8994	NaN	NaN	NaN	NaN	0.8937	0.8604	0.9069	0.9201	NaN	NaN	NaN	NaN	0.6009	NaN	0.4784	0.5821	NaN	NaN	NaN	NaN	NaN	0.4929	NaN	NaN	NaN	NaN	NaN	NaN	NaN	NaN	NaN
1218	NaN	NaN	0.9813	NaN	NaN	NaN	NaN	NaN	0.8318	0.9137	0.8861	0.8666	0.8255	0.9550	0.9143	NaN	NaN	0.8128	NaN	NaN	NaN	NaN	0.9924	0.9712	0.8528	0.8455	NaN	NaN	NaN	NaN	1.0040	NaN	1.1435	1.2609	NaN	NaN	NaN	NaN	NaN	0.8214	NaN	NaN	NaN	NaN	NaN	NaN	NaN	NaN	NaN
1219	NaN	NaN	1.1154	NaN	NaN	NaN	NaN	NaN	1.1257	0.9580	1.1523	1.0574	1.0244	1.0560	1.1491	NaN	NaN	1.0818	NaN	NaN	NaN	NaN	0.9520	1.3343	1.2469	1.1302	NaN	NaN	NaN	NaN	1.1152	NaN	1.1881	1.0260	NaN	NaN	NaN	NaN	NaN	1.3335	NaN	NaN	NaN	NaN	NaN	NaN	NaN	NaN	NaN
1220	NaN	NaN	0.9915	NaN	NaN	NaN	NaN	NaN	1.2610	1.1535	0.9981	1.2112	1.1626	1.3558	1.0450	NaN	NaN	1.2831	NaN	NaN	NaN	NaN	1.2977	1.1554	1.1151	1.2958	NaN	NaN	NaN	NaN	1.1945	NaN	1.3320	1.0416	NaN	NaN	NaN	NaN	NaN	1.2216	NaN	NaN	NaN	NaN	NaN	NaN	NaN	NaN	NaN
1221	NaN	NaN	0.9431	NaN	NaN	NaN	NaN	NaN	0.7466	0.7374	0.9685	0.7429	0.7273	0.8555	0.9331	NaN	NaN	0.9675	NaN	NaN	NaN	NaN	0.8827	0.9038	0.8306	1.0910	NaN	NaN	NaN	NaN	0.9721	NaN	1.0490	1.0300	NaN	NaN	NaN	NaN	NaN	1.3351	NaN	NaN	NaN	NaN	NaN	NaN	NaN	NaN	NaN
1222	NaN	NaN	1.0009	NaN	NaN	NaN	NaN	NaN	0.7026	1.0173	0.9973	1.0950	1.1225	1.1497	0.9661	NaN	NaN	1.0599	NaN	NaN	NaN	NaN	1.2507	0.9606	0.9605	1.0533	NaN	NaN	NaN	NaN	0.7488	NaN	0.9245	0.9046	NaN	NaN	NaN	NaN	NaN	0.8205	NaN	NaN	NaN	NaN	NaN	NaN	NaN	NaN	NaN
1223	NaN	NaN	0.9864	NaN	NaN	NaN	NaN	NaN	0.7600	1.0235	0.9676	1.0853	1.0548	1.0233	1.0539	NaN	NaN	1.0306	NaN	NaN	NaN	NaN	1.0581	0.9310	0.9870	1.0140	NaN	NaN	NaN	NaN	0.9117	NaN	0.6638	0.7610	NaN	NaN	NaN	NaN	NaN	0.6219	NaN	NaN	NaN	NaN	NaN	NaN	NaN	NaN	NaN
1224	NaN	NaN	1.0053	NaN	NaN	NaN	NaN	NaN	0.7337	1.0201	1.0064	0.9819	0.8949	1.0967	1.1573	NaN	NaN	1.0143	NaN	NaN	NaN	NaN	1.0810	1.0283	1.0947	1.1876	NaN	NaN	NaN	NaN	1.2047	NaN	1.3581	1.2460	NaN	NaN	NaN	NaN	NaN	1.3110	NaN	NaN	NaN	NaN	NaN	NaN	NaN	NaN	NaN
1225	NaN	NaN	1.1095	NaN	NaN	NaN	NaN	NaN	0.8935	1.0325	1.0849	0.9254	0.8773	0.9258	1.1837	NaN	NaN	0.9368	NaN	NaN	NaN	NaN	0.9611	1.1358	1.1622	1.1417	NaN	NaN	NaN	NaN	1.4604	NaN	1.1079	0.9135	NaN	NaN	NaN	NaN	NaN	1.4913	NaN	NaN	NaN	NaN	NaN	NaN	NaN	NaN	NaN
1226	NaN	NaN	0.9361	NaN	NaN	NaN	NaN	NaN	0.8763	0.8301	0.8926	0.9438	0.9094	0.9296	0.7818	NaN	NaN	0.7895	NaN	NaN	NaN	NaN	0.9850	0.9163	0.6943	0.8753	NaN	NaN	NaN	NaN	1.1636	NaN	0.8630	0.9278	NaN	NaN	NaN	NaN	NaN	1.0587	NaN	NaN	NaN	NaN	NaN	NaN	NaN	NaN	NaN
1227	NaN	NaN	0.8554	NaN	NaN	NaN	NaN	NaN	0.8400	0.7942	0.8038	0.6987	0.6731	0.6956	1.0827	NaN	NaN	0.5929	NaN	NaN	NaN	NaN	0.5829	1.1013	0.8346	1.1030	NaN	NaN	NaN	NaN	0.9851	NaN	1.1018	0.8295	NaN	NaN	NaN	NaN	NaN	0.9770	NaN	NaN	NaN	NaN	NaN	NaN	NaN	NaN	NaN
1228	NaN	NaN	1.0492	NaN	NaN	NaN	NaN	NaN	1.1528	1.1101	1.1212	1.0530	1.0062	0.9879	1.0916	NaN	NaN	1.1846	NaN	NaN	NaN	NaN	1.0516	1.1547	1.1954	1.1264	NaN	NaN	NaN	NaN	1.1122	NaN	1.1210	0.9895	NaN	NaN	NaN	NaN	NaN	1.0740	NaN	NaN	NaN	NaN	NaN	NaN	NaN	NaN	NaN
1229	NaN	NaN	1.1007	NaN	NaN	NaN	NaN	NaN	1.1755	1.0367	1.1117	1.1593	1.1842	1.1678	1.1876	NaN	NaN	1.1962	NaN	NaN	NaN	NaN	1.0782	1.0618	0.8859	0.8935	NaN	NaN	NaN	NaN	1.0965	NaN	1.0582	1.0436	NaN	NaN	NaN	NaN	NaN	1.0143	NaN	NaN	NaN	NaN	NaN	NaN	NaN	NaN	NaN
1230	NaN	NaN	0.9912	NaN	NaN	NaN	NaN	NaN	0.6860	0.7708	1.0574	0.8321	0.7835	0.7731	0.9189	NaN	NaN	0.8552	NaN	NaN	NaN	NaN	0.5915	0.8692	1.0432	0.8799	NaN	NaN	NaN	NaN	0.8206	NaN	0.9983	1.1592	NaN	NaN	NaN	NaN	NaN	0.9139	NaN	NaN	NaN	NaN	NaN	NaN	NaN	NaN	NaN
1231	NaN	NaN	0.8861	NaN	NaN	NaN	NaN	NaN	0.9518	1.0202	0.7450	0.9698	0.9639	1.0396	0.9423	NaN	NaN	1.0549	NaN	NaN	NaN	NaN	1.2212	0.9385	0.9672	0.9517	NaN	NaN	NaN	NaN	0.5972	NaN	0.7485	1.0058	NaN	NaN	NaN	NaN	NaN	0.7042	NaN	NaN	NaN	NaN	NaN	NaN	NaN	NaN	NaN
1232	NaN	NaN	0.9797	NaN	NaN	NaN	NaN	NaN	1.1570	1.0833	0.9718	1.0747	1.0670	1.1133	1.2246	NaN	NaN	1.2053	NaN	NaN	NaN	NaN	1.1876	0.9685	0.8365	0.9940	NaN	NaN	NaN	NaN	0.7191	NaN	1.1008	0.9550	NaN	NaN	NaN	NaN	NaN	1.2590	NaN	NaN	NaN	NaN	NaN	NaN	NaN	NaN	NaN
1233	NaN	NaN	0.9959	NaN	NaN	NaN	NaN	NaN	0.8644	0.8471	1.0052	0.9386	0.8945	0.9927	1.0080	NaN	NaN	0.8625	NaN	NaN	NaN	NaN	1.1130	0.9773	1.0372	1.1127	NaN	NaN	NaN	NaN	0.8695	NaN	1.0354	0.8325	NaN	NaN	NaN	NaN	NaN	0.9534	NaN	NaN	NaN	NaN	NaN	NaN	NaN	NaN	NaN
1234	NaN	NaN	0.9891	NaN	NaN	NaN	NaN	NaN	1.1040	1.1087	0.9820	0.9842	0.8806	1.1008	1.0008	NaN	NaN	1.0265	NaN	NaN	NaN	NaN	1.0931	0.8911	1.0270	0.9105	NaN	NaN	NaN	NaN	1.0651	NaN	1.0119	0.7979	NaN	NaN	NaN	NaN	NaN	0.7400	NaN	NaN	NaN	NaN	NaN	NaN	NaN	NaN	NaN
1235	NaN	NaN	0.9485	NaN	NaN	NaN	NaN	NaN	0.8958	0.7489	1.0095	0.9168	0.9357	0.8118	1.0164	NaN	NaN	0.8860	NaN	NaN	NaN	NaN	0.7192	0.9025	1.0946	0.8849	NaN	NaN	NaN	NaN	1.0916	NaN	1.0651	1.0042	NaN	NaN	NaN	NaN	NaN	0.9783	NaN	NaN	NaN	NaN	NaN	NaN	NaN	NaN	NaN
1236	NaN	NaN	0.9508	NaN	NaN	NaN	NaN	NaN	0.8180	0.8574	0.9069	0.8621	0.8607	0.9728	0.7600	NaN	NaN	0.7591	NaN	NaN	NaN	NaN	0.9902	0.9521	0.7806	0.8370	NaN	NaN	NaN	NaN	0.9863	NaN	0.4668	0.8804	NaN	NaN	NaN	NaN	NaN	0.7964	NaN	NaN	NaN	NaN	NaN	NaN	NaN	NaN	NaN
1237	NaN	NaN	1.0393	NaN	NaN	NaN	NaN	NaN	0.8926	0.9434	0.9345	0.8829	0.9364	0.8981	0.9095	NaN	NaN	1.0055	NaN	NaN	NaN	NaN	0.9270	0.9004	0.8616	0.8918	NaN	NaN	NaN	NaN	0.9271	NaN	0.9111	0.8072	NaN	NaN	NaN	NaN	NaN	0.9873	NaN	NaN	NaN	NaN	NaN	NaN	NaN	NaN	NaN
1238	NaN	NaN	1.0033	NaN	NaN	NaN	NaN	NaN	1.1967	1.1140	1.0378	1.1697	1.2208	1.1701	1.2323	NaN	NaN	1.2140	NaN	NaN	NaN	NaN	0.9552	1.0809	1.1713	1.2963	NaN	NaN	NaN	NaN	0.9063	NaN	0.9626	0.8568	NaN	NaN	NaN	NaN	NaN	0.7944	NaN	NaN	NaN	NaN	NaN	NaN	NaN	NaN	NaN
1239	NaN	NaN	0.8960	NaN	NaN	NaN	NaN	NaN	1.1562	1.1401	1.0456	1.0570	1.0819	1.1066	0.8206	NaN	NaN	1.2928	NaN	NaN	NaN	NaN	1.0743	0.7858	0.9804	0.8802	NaN	NaN	NaN	NaN	0.9507	NaN	0.8411	0.9540	NaN	NaN	NaN	NaN	NaN	0.6824	NaN	NaN	NaN	NaN	NaN	NaN	NaN	NaN	NaN
1240	NaN	NaN	0.9594	NaN	NaN	NaN	NaN	NaN	1.0727	1.0032	1.0847	1.0301	0.9427	0.9536	1.0062	NaN	NaN	0.9542	NaN	NaN	NaN	NaN	0.9116	1.0747	1.0300	0.9511	NaN	NaN	NaN	NaN	1.1282	NaN	1.4160	1.1066	NaN	NaN	NaN	NaN	NaN	1.3143	NaN	NaN	NaN	NaN	NaN	NaN	NaN	NaN	NaN
1241	NaN	NaN	1.0057	NaN	NaN	NaN	NaN	NaN	1.1085	1.0746	0.9680	1.1035	1.1119	1.1253	1.0706	NaN	NaN	1.0412	NaN	NaN	NaN	NaN	1.0105	0.9994	1.0629	0.9881	NaN	NaN	NaN	NaN	0.9915	NaN	1.6932	1.0906	NaN	NaN	NaN	NaN	NaN	1.2958	NaN	NaN	NaN	NaN	NaN	NaN	NaN	NaN	NaN
1242	NaN	NaN	0.9996	NaN	NaN	NaN	NaN	NaN	0.7705	0.7510	0.9224	0.8045	0.7482	0.7786	0.8697	NaN	NaN	0.9769	NaN	NaN	NaN	NaN	0.7606	0.8878	0.9317	0.7945	NaN	NaN	NaN	NaN	1.2725	NaN	0.8169	1.1682	NaN	NaN	NaN	NaN	NaN	1.0265	NaN	NaN	NaN	NaN	NaN	NaN	NaN	NaN	NaN
1243	NaN	NaN	1.0112	NaN	NaN	NaN	NaN	NaN	0.9072	0.9558	0.9105	0.9408	0.8720	1.0680	0.8333	NaN	NaN	1.1095	NaN	NaN	NaN	NaN	0.9528	0.8127	0.9734	0.8685	NaN	NaN	NaN	NaN	0.8929	NaN	1.3302	1.0532	NaN	NaN	NaN	NaN	NaN	1.2226	NaN	NaN	NaN	NaN	NaN	NaN	NaN	NaN	NaN
1244	NaN	NaN	0.9921	NaN	NaN	NaN	NaN	NaN	0.8135	0.6937	1.0073	0.8920	0.9342	0.8501	0.9620	NaN	NaN	0.8398	NaN	NaN	NaN	NaN	0.9420	0.7972	0.8159	0.7974	NaN	NaN	NaN	NaN	0.7866	NaN	0.9142	1.1193	NaN	NaN	NaN	NaN	NaN	0.8688	NaN	NaN	NaN	NaN	NaN	NaN	NaN	NaN	NaN
1245	NaN	NaN	0.8457	NaN	NaN	NaN	NaN	NaN	0.9084	0.9181	0.8856	0.8803	0.9315	0.9185	1.1210	NaN	NaN	1.0605	NaN	NaN	NaN	NaN	0.9243	1.1185	1.1548	1.0432	NaN	NaN	NaN	NaN	1.3569	NaN	0.4251	0.7909	NaN	NaN	NaN	NaN	NaN	0.7361	NaN	NaN	NaN	NaN	NaN	NaN	NaN	NaN	NaN
1246	NaN	NaN	1.0973	NaN	NaN	NaN	NaN	NaN	1.0814	0.9185	1.1223	1.0450	1.0342	1.0920	0.9926	NaN	NaN	0.9320	NaN	NaN	NaN	NaN	0.9777	0.8391	0.9267	0.8297	NaN	NaN	NaN	NaN	0.9514	NaN	1.6283	1.2287	NaN	NaN	NaN	NaN	NaN	1.5214	NaN	NaN	NaN	NaN	NaN	NaN	NaN	NaN	NaN
1247	NaN	NaN	1.0705	NaN	NaN	NaN	NaN	NaN	1.0634	1.0655	1.0213	0.9808	0.9842	0.9534	0.8951	NaN	NaN	1.0004	NaN	NaN	NaN	NaN	0.8922	0.8693	0.9904	1.0502	NaN	NaN	NaN	NaN	1.1931	NaN	1.3796	1.1651	NaN	NaN	NaN	NaN	NaN	1.3696	NaN	NaN	NaN	NaN	NaN	NaN	NaN	NaN	NaN
1248	NaN	NaN	1.0976	NaN	NaN	NaN	NaN	NaN	1.2844	1.1949	1.0925	1.1780	1.0375	1.2222	1.1794	NaN	NaN	1.1587	NaN	NaN	NaN	NaN	1.1342	1.1585	1.2987	1.1976	NaN	NaN	NaN	NaN	1.1780	NaN	1.2621	0.9922	NaN	NaN	NaN	NaN	NaN	1.2444	NaN	NaN	NaN	NaN	NaN	NaN	NaN	NaN	NaN
1249	NaN	NaN	1.0204	NaN	NaN	NaN	NaN	NaN	1.0462	0.8546	0.8597	1.0055	0.8603	1.0339	0.9444	NaN	NaN	1.2032	NaN	NaN	NaN	NaN	0.9993	1.2567	1.3122	1.1085	NaN	NaN	NaN	NaN	1.0382	NaN	1.0071	1.1307	NaN	NaN	NaN	NaN	NaN	1.1001	NaN	NaN	NaN	NaN	NaN	NaN	NaN	NaN	NaN
1250	NaN	NaN	0.8202	NaN	NaN	NaN	NaN	NaN	0.7491	0.8339	0.7393	0.6986	0.7034	0.6560	0.7554	NaN	NaN	0.8944	NaN	NaN	NaN	NaN	0.8094	1.2470	0.9588	0.9628	NaN	NaN	NaN	NaN	0.7295	NaN	0.6056	0.8534	NaN	NaN	NaN	NaN	NaN	0.5903	NaN	NaN	NaN	NaN	NaN	NaN	NaN	NaN	NaN
1251	NaN	NaN	1.0268	NaN	NaN	NaN	NaN	NaN	0.9444	1.0206	1.0078	1.0150	1.0029	0.9727	0.8357	NaN	NaN	0.6091	NaN	NaN	NaN	NaN	0.9762	0.9086	0.9884	1.0376	NaN	NaN	NaN	NaN	1.1979	NaN	0.8657	1.1734	NaN	NaN	NaN	NaN	NaN	0.9449	NaN	NaN	NaN	NaN	NaN	NaN	NaN	NaN	NaN
1252	NaN	NaN	1.1169	NaN	NaN	NaN	NaN	NaN	0.9696	1.0119	1.1393	1.0079	0.9715	0.9860	1.0541	NaN	NaN	1.2264	NaN	NaN	NaN	NaN	1.0888	1.1764	1.1612	1.1680	NaN	NaN	NaN	NaN	1.2182	NaN	1.1926	1.2344	NaN	NaN	NaN	NaN	NaN	1.2960	NaN	NaN	NaN	NaN	NaN	NaN	NaN	NaN	NaN
1253	NaN	NaN	1.0461	NaN	NaN	NaN	NaN	NaN	1.1075	0.9025	1.0687	1.0343	1.0148	0.9934	0.9445	NaN	NaN	1.0501	NaN	NaN	NaN	NaN	1.1002	0.8745	0.9317	0.9247	NaN	NaN	NaN	NaN	0.6473	NaN	0.9549	1.0291	NaN	NaN	NaN	NaN	NaN	0.8462	NaN	NaN	NaN	NaN	NaN	NaN	NaN	NaN	NaN
1254	NaN	NaN	0.8892	NaN	NaN	NaN	NaN	NaN	0.9397	1.1244	0.8342	0.7764	0.7324	0.8199	0.8276	NaN	NaN	0.7318	NaN	NaN	NaN	NaN	0.8473	1.3912	1.1605	1.2091	NaN	NaN	NaN	NaN	1.1271	NaN	0.7565	0.8498	NaN	NaN	NaN	NaN	NaN	0.6204	NaN	NaN	NaN	NaN	NaN	NaN	NaN	NaN	NaN
1255	NaN	NaN	1.1145	NaN	NaN	NaN	NaN	NaN	1.1629	1.1790	1.0201	1.0612	0.9237	0.9442	1.0434	NaN	NaN	0.9297	NaN	NaN	NaN	NaN	1.0545	0.8826	1.1633	0.9389	NaN	NaN	NaN	NaN	0.7935	NaN	1.2303	1.0739	NaN	NaN	NaN	NaN	NaN	1.1850	NaN	NaN	NaN	NaN	NaN	NaN	NaN	NaN	NaN
1256	NaN	NaN	1.1798	NaN	NaN	NaN	NaN	NaN	1.3439	1.2691	1.1527	1.1535	1.1062	1.1371	1.1362	NaN	NaN	1.1162	NaN	NaN	NaN	NaN	1.2100	1.2512	1.0700	1.1202	NaN	NaN	NaN	NaN	0.9711	NaN	1.0495	0.9505	NaN	NaN	NaN	NaN	NaN	0.8070	NaN	NaN	NaN	NaN	NaN	NaN	NaN	NaN	NaN
1257	NaN	NaN	0.9376	NaN	NaN	NaN	NaN	NaN	1.0624	0.9939	0.9463	0.9666	0.9158	0.9121	0.5600	NaN	NaN	1.0847	NaN	NaN	NaN	NaN	0.9952	0.6041	0.6156	0.6336	NaN	NaN	NaN	NaN	0.8021	NaN	0.9610	0.9685	NaN	NaN	NaN	NaN	NaN	0.9663	NaN	NaN	NaN	NaN	NaN	NaN	NaN	NaN	NaN
1258	NaN	NaN	1.1499	NaN	NaN	NaN	NaN	NaN	1.0526	0.8259	1.1188	0.7766	0.8340	0.7769	0.9394	NaN	NaN	0.9796	NaN	NaN	NaN	NaN	0.8116	1.3729	0.8929	1.1797	NaN	NaN	NaN	NaN	1.0439	NaN	0.7006	0.9455	NaN	NaN	NaN	NaN	NaN	0.6211	NaN	NaN	NaN	NaN	NaN	NaN	NaN	NaN	NaN
1259	NaN	NaN	1.0012	NaN	NaN	NaN	NaN	NaN	1.0912	0.9543	1.0960	1.0780	1.0327	0.9409	1.2515	NaN	NaN	1.0846	NaN	NaN	NaN	NaN	0.9466	1.2070	1.3453	1.0412	NaN	NaN	NaN	NaN	1.4556	NaN	1.3609	1.0821	NaN	NaN	NaN	NaN	NaN	1.3823	NaN	NaN	NaN	NaN	NaN	NaN	NaN	NaN	NaN
1260	NaN	NaN	0.9010	NaN	NaN	NaN	NaN	NaN	1.2278	1.2098	0.9195	1.0944	1.1375	0.9961	0.8829	NaN	NaN	1.1792	NaN	NaN	NaN	NaN	0.9802	0.7867	1.2639	1.1972	NaN	NaN	NaN	NaN	0.9393	NaN	0.7574	0.8314	NaN	NaN	NaN	NaN	NaN	0.6308	NaN	NaN	NaN	NaN	NaN	NaN	NaN	NaN	NaN
1261	NaN	NaN	0.8356	NaN	NaN	NaN	NaN	NaN	1.2430	1.0397	0.8482	1.1254	1.1528	1.0459	1.0178	NaN	NaN	1.1888	NaN	NaN	NaN	NaN	1.1071	0.8572	0.9142	1.1364	NaN	NaN	NaN	NaN	0.7468	NaN	0.8208	1.0392	NaN	NaN	NaN	NaN	NaN	0.8407	NaN	NaN	NaN	NaN	NaN	NaN	NaN	NaN	NaN
1262	NaN	NaN	0.9519	NaN	NaN	NaN	NaN	NaN	1.3277	1.3819	0.9560	1.3094	1.2836	1.2679	1.2760	NaN	NaN	0.9890	NaN	NaN	NaN	NaN	1.3409	1.1587	1.2615	1.1735	NaN	NaN	NaN	NaN	1.3186	NaN	1.4488	1.2985	NaN	NaN	NaN	NaN	NaN	1.4250	NaN	NaN	NaN	NaN	NaN	NaN	NaN	NaN	NaN
1263	NaN	NaN	0.9247	NaN	NaN	NaN	NaN	NaN	1.1004	0.9843	0.7837	0.8208	0.8009	0.9513	1.0053	NaN	NaN	0.7388	NaN	NaN	NaN	NaN	0.8489	0.9431	0.8803	0.8768	NaN	NaN	NaN	NaN	0.9366	NaN	1.0486	1.1719	NaN	NaN	NaN	NaN	NaN	1.1412	NaN	NaN	NaN	NaN	NaN	NaN	NaN	NaN	NaN
1264	NaN	NaN	0.8574	NaN	NaN	NaN	NaN	NaN	0.8784	0.8278	0.9057	0.7636	0.6546	0.8625	0.7752	NaN	NaN	0.8002	NaN	NaN	NaN	NaN	0.8820	0.8093	0.6931	0.7069	NaN	NaN	NaN	NaN	0.8910	NaN	0.6563	0.7272	NaN	NaN	NaN	NaN	NaN	0.8861	NaN	NaN	NaN	NaN	NaN	NaN	NaN	NaN	NaN
1265	NaN	NaN	1.0368	NaN	NaN	NaN	NaN	NaN	1.1114	1.2259	1.0501	1.1917	1.1716	1.0726	0.8961	NaN	NaN	1.1047	NaN	NaN	NaN	NaN	0.7432	0.8077	0.8458	0.7438	NaN	NaN	NaN	NaN	1.2711	NaN	1.2036	1.4911	NaN	NaN	NaN	NaN	NaN	1.3040	NaN	NaN	NaN	NaN	NaN	NaN	NaN	NaN	NaN
1266	NaN	NaN	1.1591	NaN	NaN	NaN	NaN	NaN	1.2051	1.0428	1.1221	0.9675	1.0423	0.9643	0.9269	NaN	NaN	1.0375	NaN	NaN	NaN	NaN	1.0209	0.9231	1.1228	1.0260	NaN	NaN	NaN	NaN	1.5864	NaN	1.0207	1.1920	NaN	NaN	NaN	NaN	NaN	1.3577	NaN	NaN	NaN	NaN	NaN	NaN	NaN	NaN	NaN
1267	NaN	NaN	1.1236	NaN	NaN	NaN	NaN	NaN	1.5589	1.2355	1.0617	1.2501	1.3077	1.1048	1.0949	NaN	NaN	1.0283	NaN	NaN	NaN	NaN	1.0393	1.1360	1.4012	1.2033	NaN	NaN	NaN	NaN	0.8816	NaN	0.7699	0.9666	NaN	NaN	NaN	NaN	NaN	1.1789	NaN	NaN	NaN	NaN	NaN	NaN	NaN	NaN	NaN
1268	NaN	NaN	0.9507	NaN	NaN	NaN	NaN	NaN	1.1443	0.9845	0.8870	0.9111	1.0634	0.8464	1.0184	NaN	NaN	1.0520	NaN	NaN	NaN	NaN	1.0221	1.1804	1.3372	1.0295	NaN	NaN	NaN	NaN	0.8862	NaN	0.9450	0.9868	NaN	NaN	NaN	NaN	NaN	0.8520	NaN	NaN	NaN	NaN	NaN	NaN	NaN	NaN	NaN
1269	NaN	NaN	0.9573	NaN	NaN	NaN	NaN	NaN	0.8096	0.7910	0.9161	0.8994	0.7003	0.8854	0.9142	NaN	NaN	1.2274	NaN	NaN	NaN	NaN	0.9113	0.9540	0.9899	0.8548	NaN	NaN	NaN	NaN	0.9568	NaN	0.8651	1.0050	NaN	NaN	NaN	NaN	NaN	0.8163	NaN	NaN	NaN	NaN	NaN	NaN	NaN	NaN	NaN
1270	NaN	NaN	1.0499	NaN	NaN	NaN	NaN	NaN	1.0800	1.1627	1.1370	1.0713	0.9971	1.1050	1.0948	NaN	NaN	1.0234	NaN	NaN	NaN	NaN	1.0839	1.0983	1.1336	1.0370	NaN	NaN	NaN	NaN	1.4025	NaN	1.2288	1.2719	NaN	NaN	NaN	NaN	NaN	1.5591	NaN	NaN	NaN	NaN	NaN	NaN	NaN	NaN	NaN
1271	NaN	NaN	0.9966	NaN	NaN	NaN	NaN	NaN	0.8250	0.9105	1.1128	0.9485	0.8158	0.9016	0.9071	NaN	NaN	1.1466	NaN	NaN	NaN	NaN	0.8683	1.1266	1.1138	1.0087	NaN	NaN	NaN	NaN	0.6758	NaN	0.5366	0.7887	NaN	NaN	NaN	NaN	NaN	0.6113	NaN	NaN	NaN	NaN	NaN	NaN	NaN	NaN	NaN
1272	NaN	NaN	0.9987	NaN	NaN	NaN	NaN	NaN	1.2619	1.3324	1.0445	1.1256	1.0586	1.1497	1.1736	NaN	NaN	0.9009	NaN	NaN	NaN	NaN	1.2744	0.8935	0.8768	0.9742	NaN	NaN	NaN	NaN	0.8653	NaN	0.7019	0.8025	NaN	NaN	NaN	NaN	NaN	0.7040	NaN	NaN	NaN	NaN	NaN	NaN	NaN	NaN	NaN
1273	NaN	NaN	0.8729	NaN	NaN	NaN	NaN	NaN	0.9404	0.7661	0.9638	0.7160	0.7988	0.7985	0.7615	NaN	NaN	1.0569	NaN	NaN	NaN	NaN	0.7713	0.8244	0.8211	0.8229	NaN	NaN	NaN	NaN	0.8294	NaN	0.7092	0.7727	NaN	NaN	NaN	NaN	NaN	0.5339	NaN	NaN	NaN	NaN	NaN	NaN	NaN	NaN	NaN
1274	NaN	NaN	1.1274	NaN	NaN	NaN	NaN	NaN	1.1757	1.0306	1.0926	1.0106	1.0620	1.0182	1.1425	NaN	NaN	0.9529	NaN	NaN	NaN	NaN	1.0078	1.0500	1.0472	1.0810	NaN	NaN	NaN	NaN	1.2426	NaN	1.2085	1.0869	NaN	NaN	NaN	NaN	NaN	1.4839	NaN	NaN	NaN	NaN	NaN	NaN	NaN	NaN	NaN
1275	NaN	NaN	0.9973	NaN	NaN	NaN	NaN	NaN	1.2064	1.0858	1.0297	1.0885	1.1717	1.0253	0.7757	NaN	NaN	1.1750	NaN	NaN	NaN	NaN	0.9789	0.7451	0.6311	0.7868	NaN	NaN	NaN	NaN	0.6195	NaN	1.1123	0.9233	NaN	NaN	NaN	NaN	NaN	1.0681	NaN	NaN	NaN	NaN	NaN	NaN	NaN	NaN	NaN
1276	NaN	NaN	0.9538	NaN	NaN	NaN	NaN	NaN	1.0206	0.7970	0.8932	0.9371	0.7702	0.9319	1.0136	NaN	NaN	0.6257	NaN	NaN	NaN	NaN	1.0522	0.9951	1.0111	1.0830	NaN	NaN	NaN	NaN	1.0816	NaN	1.2259	1.0342	NaN	NaN	NaN	NaN	NaN	1.0817	NaN	NaN	NaN	NaN	NaN	NaN	NaN	NaN	NaN
1277	NaN	NaN	1.0468	NaN	NaN	NaN	NaN	NaN	0.9799	1.0362	1.0086	1.0409	0.9493	0.9861	1.0962	NaN	NaN	1.0108	NaN	NaN	NaN	NaN	1.0797	0.9389	1.1672	1.0550	NaN	NaN	NaN	NaN	1.4176	NaN	1.2021	1.0159	NaN	NaN	NaN	NaN	NaN	1.3043	NaN	NaN	NaN	NaN	NaN	NaN	NaN	NaN	NaN
1278	NaN	NaN	1.1656	NaN	NaN	NaN	NaN	NaN	1.1068	1.0554	1.0816	0.9755	1.0691	0.8808	1.0032	NaN	NaN	1.1711	NaN	NaN	NaN	NaN	0.7894	0.9140	0.9737	1.1374	NaN	NaN	NaN	NaN	0.5172	NaN	0.8440	0.9318	NaN	NaN	NaN	NaN	NaN	0.7144	NaN	NaN	NaN	NaN	NaN	NaN	NaN	NaN	NaN
1279	NaN	NaN	0.8424	NaN	NaN	NaN	NaN	NaN	1.0418	1.1191	0.8098	1.0915	1.1775	0.9985	0.8776	NaN	NaN	1.0408	NaN	NaN	NaN	NaN	1.3225	1.1377	0.9955	0.9394	NaN	NaN	NaN	NaN	1.1172	NaN	0.4669	0.7511	NaN	NaN	NaN	NaN	NaN	0.4449	NaN	NaN	NaN	NaN	NaN	NaN	NaN	NaN	NaN
1280	NaN	NaN	0.9915	NaN	NaN	NaN	NaN	NaN	1.0243	1.0278	1.0675	1.0715	1.0749	1.0279	1.0372	NaN	NaN	1.0057	NaN	NaN	NaN	NaN	1.1278	1.0910	1.2143	1.1598	NaN	NaN	NaN	NaN	1.1236	NaN	1.2427	1.1176	NaN	NaN	NaN	NaN	NaN	1.2487	NaN	NaN	NaN	NaN	NaN	NaN	NaN	NaN	NaN
1281	NaN	NaN	1.0171	NaN	NaN	NaN	NaN	NaN	1.0850	1.1652	0.9539	1.0936	1.0863	0.9898	1.0015	NaN	NaN	1.0513	NaN	NaN	NaN	NaN	0.9102	0.6668	0.7309	0.8749	NaN	NaN	NaN	NaN	1.0056	NaN	1.1793	1.1277	NaN	NaN	NaN	NaN	NaN	1.2141	NaN	NaN	NaN	NaN	NaN	NaN	NaN	NaN	NaN
1282	NaN	NaN	1.0507	NaN	NaN	NaN	NaN	NaN	1.2283	1.0654	1.0943	1.0770	1.0940	1.0806	1.0691	NaN	NaN	1.1843	NaN	NaN	NaN	NaN	1.0343	1.0043	1.0036	1.0226	NaN	NaN	NaN	NaN	0.8153	NaN	1.1506	1.1551	NaN	NaN	NaN	NaN	NaN	1.2492	NaN	NaN	NaN	NaN	NaN	NaN	NaN	NaN	NaN
1283	NaN	NaN	0.9469	NaN	NaN	NaN	NaN	NaN	1.2492	1.2401	1.0011	1.2640	1.1562	1.2327	1.1403	NaN	NaN	1.0611	NaN	NaN	NaN	NaN	1.3140	1.0951	1.2105	1.1576	NaN	NaN	NaN	NaN	1.4394	NaN	0.9789	0.7339	NaN	NaN	NaN	NaN	NaN	1.1142	NaN	NaN	NaN	NaN	NaN	NaN	NaN	NaN	NaN
1284	NaN	NaN	0.9041	NaN	NaN	NaN	NaN	NaN	0.7470	0.6473	0.8491	0.7750	0.7610	0.7813	0.6597	NaN	NaN	0.6789	NaN	NaN	NaN	NaN	0.7508	0.8431	0.8132	0.8323	NaN	NaN	NaN	NaN	1.0757	NaN	1.1292	1.3107	NaN	NaN	NaN	NaN	NaN	1.4239	NaN	NaN	NaN	NaN	NaN	NaN	NaN	NaN	NaN
1285	NaN	NaN	0.8275	NaN	NaN	NaN	NaN	NaN	0.7249	0.6122	0.6808	0.5102	0.5450	0.6017	0.9528	NaN	NaN	0.5543	NaN	NaN	NaN	NaN	0.7237	1.0235	1.1879	0.9132	NaN	NaN	NaN	NaN	0.6871	NaN	0.7295	0.9754	NaN	NaN	NaN	NaN	NaN	0.6418	NaN	NaN	NaN	NaN	NaN	NaN	NaN	NaN	NaN
1286	NaN	NaN	1.1827	NaN	NaN	NaN	NaN	NaN	1.1531	1.1449	1.3416	1.1727	1.2157	1.1160	1.2287	NaN	NaN	0.9573	NaN	NaN	NaN	NaN	1.2169	1.0293	1.0447	1.1562	NaN	NaN	NaN	NaN	0.6537	NaN	0.8982	0.9723	NaN	NaN	NaN	NaN	NaN	1.0414	NaN	NaN	NaN	NaN	NaN	NaN	NaN	NaN	NaN
1287	NaN	NaN	1.0747	NaN	NaN	NaN	NaN	NaN	1.1631	1.0066	1.1329	1.1328	1.0546	1.1440	0.9267	NaN	NaN	0.7233	NaN	NaN	NaN	NaN	1.0509	1.1157	1.1518	1.1480	NaN	NaN	NaN	NaN	1.2986	NaN	1.3043	1.2132	NaN	NaN	NaN	NaN	NaN	1.4243	NaN	NaN	NaN	NaN	NaN	NaN	NaN	NaN	NaN
1288	NaN	NaN	0.9114	NaN	NaN	NaN	NaN	NaN	0.9782	0.9554	0.9568	1.0349	1.0241	1.0164	0.9001	NaN	NaN	0.9225	NaN	NaN	NaN	NaN	0.9107	0.7250	0.8258	0.8314	NaN	NaN	NaN	NaN	0.8009	NaN	1.1039	1.1603	NaN	NaN	NaN	NaN	NaN	1.3270	NaN	NaN	NaN	NaN	NaN	NaN	NaN	NaN	NaN
1289	NaN	NaN	0.9986	NaN	NaN	NaN	NaN	NaN	1.1881	1.0511	0.9337	1.0559	0.9870	1.0170	1.0527	NaN	NaN	1.1238	NaN	NaN	NaN	NaN	1.0079	0.9154	0.9153	0.8939	NaN	NaN	NaN	NaN	1.0509	NaN	1.0016	1.1281	NaN	NaN	NaN	NaN	NaN	0.8998	NaN	NaN	NaN	NaN	NaN	NaN	NaN	NaN	NaN
1290	NaN	NaN	1.0629	NaN	NaN	NaN	NaN	NaN	1.2973	1.1316	1.0781	1.1040	1.0903	1.0391	1.2377	NaN	NaN	1.0066	NaN	NaN	NaN	NaN	0.9571	0.8652	0.9790	0.9854	NaN	NaN	NaN	NaN	1.0507	NaN	1.1028	0.9919	NaN	NaN	NaN	NaN	NaN	0.9294	NaN	NaN	NaN	NaN	NaN	NaN	NaN	NaN	NaN
1291	NaN	NaN	1.0073	NaN	NaN	NaN	NaN	NaN	1.2166	1.2813	1.0381	1.2431	1.2417	1.2602	1.1572	NaN	NaN	1.1115	NaN	NaN	NaN	NaN	1.1613	1.1382	1.1250	1.1665	NaN	NaN	NaN	NaN	1.2396	NaN	1.3910	1.0722	NaN	NaN	NaN	NaN	NaN	1.3182	NaN	NaN	NaN	NaN	NaN	NaN	NaN	NaN	NaN
1292	NaN	NaN	0.8491	NaN	NaN	NaN	NaN	NaN	0.7474	0.7519	0.7460	0.6660	0.7469	0.7428	0.7929	NaN	NaN	0.8719	NaN	NaN	NaN	NaN	0.7711	0.9203	0.8463	0.8176	NaN	NaN	NaN	NaN	0.8516	NaN	0.8636	0.8817	NaN	NaN	NaN	NaN	NaN	0.7959	NaN	NaN	NaN	NaN	NaN	NaN	NaN	NaN	NaN
1293	NaN	NaN	1.0159	NaN	NaN	NaN	NaN	NaN	0.7566	0.8812	1.0823	0.9258	0.9619	0.8224	0.9687	NaN	NaN	0.9376	NaN	NaN	NaN	NaN	0.8015	0.9934	1.0311	1.0530	NaN	NaN	NaN	NaN	1.2737	NaN	0.8480	0.9798	NaN	NaN	NaN	NaN	NaN	0.9970	NaN	NaN	NaN	NaN	NaN	NaN	NaN	NaN	NaN
1294	NaN	NaN	1.0033	NaN	NaN	NaN	NaN	NaN	1.0549	0.9455	1.0785	1.0352	0.9027	1.0017	0.7931	NaN	NaN	1.0160	NaN	NaN	NaN	NaN	0.9209	1.0804	1.1377	1.0381	NaN	NaN	NaN	NaN	1.2469	NaN	0.7157	1.0998	NaN	NaN	NaN	NaN	NaN	0.6894	NaN	NaN	NaN	NaN	NaN	0.8276	NaN	NaN	NaN
1295	NaN	NaN	0.8976	NaN	NaN	NaN	NaN	NaN	1.0401	0.9874	0.8658	0.9889	1.0098	1.0332	1.0126	NaN	NaN	0.9050	NaN	NaN	NaN	NaN	1.0790	1.1840	1.4164	1.1678	NaN	NaN	NaN	NaN	1.2254	NaN	1.1692	1.0601	NaN	NaN	NaN	NaN	NaN	1.3491	NaN	NaN	NaN	NaN	NaN	0.9940	NaN	NaN	NaN
1296	NaN	NaN	0.9174	NaN	NaN	NaN	NaN	NaN	0.8504	0.9161	0.7313	0.8148	0.8416	0.8629	0.6187	NaN	NaN	0.4240	NaN	NaN	NaN	NaN	0.8454	0.5830	0.5290	0.6476	NaN	NaN	NaN	NaN	0.3778	NaN	0.6029	0.6959	NaN	NaN	NaN	NaN	NaN	0.7854	NaN	NaN	NaN	NaN	NaN	0.8857	NaN	NaN	NaN
1297	NaN	NaN	1.1608	NaN	NaN	NaN	NaN	NaN	0.8245	0.8751	1.1785	1.0036	0.8605	0.9545	1.0534	NaN	NaN	1.1582	NaN	NaN	NaN	NaN	0.8271	1.0382	1.0536	1.0628	NaN	NaN	NaN	NaN	0.8377	NaN	0.9362	0.9852	NaN	NaN	NaN	NaN	NaN	0.9036	NaN	NaN	NaN	NaN	NaN	1.0244	NaN	NaN	NaN
1298	NaN	NaN	1.0802	NaN	NaN	NaN	NaN	NaN	1.0132	0.9692	1.0513	1.0958	1.0320	1.1435	0.9921	NaN	NaN	1.1454	NaN	NaN	NaN	NaN	1.1640	0.9821	0.8483	0.9670	NaN	NaN	NaN	NaN	0.8040	NaN	1.0192	1.1367	NaN	NaN	NaN	NaN	NaN	1.2199	NaN	NaN	NaN	NaN	NaN	1.0878	NaN	NaN	NaN
1299	NaN	NaN	1.1961	NaN	NaN	NaN	NaN	NaN	1.1118	0.9092	1.0627	1.1385	1.0277	1.0788	1.0174	NaN	NaN	0.8210	NaN	1.0649	NaN	NaN	0.9987	0.9082	0.7215	1.0362	NaN	NaN	NaN	NaN	0.7821	NaN	0.7756	0.7926	NaN	NaN	NaN	NaN	NaN	0.6708	NaN	NaN	NaN	NaN	NaN	1.1104	NaN	NaN	NaN
1300	NaN	NaN	1.0174	NaN	NaN	NaN	NaN	NaN	1.0409	0.9933	0.9358	0.9436	0.9282	0.9280	0.9875	NaN	NaN	1.1243	NaN	1.0614	NaN	NaN	0.8270	1.0211	0.9093	1.0121	NaN	NaN	NaN	NaN	1.1619	NaN	0.7957	0.8945	NaN	NaN	NaN	NaN	NaN	0.5869	NaN	NaN	NaN	NaN	NaN	1.2634	NaN	NaN	NaN
1301	NaN	NaN	1.0022	NaN	NaN	NaN	NaN	NaN	1.1085	1.0565	0.9801	1.1621	1.0727	1.0695	1.0296	NaN	NaN	1.0189	NaN	1.0959	NaN	NaN	0.8972	1.1368	1.1852	1.1622	NaN	NaN	NaN	NaN	0.8828	NaN	0.9071	0.9620	NaN	NaN	NaN	NaN	NaN	1.1656	NaN	NaN	NaN	NaN	NaN	1.4287	NaN	NaN	NaN
1302	NaN	NaN	0.9954	NaN	NaN	NaN	NaN	NaN	1.3402	1.0847	1.0609	1.1222	1.0942	1.1239	0.9399	NaN	NaN	1.0305	NaN	1.0260	NaN	NaN	1.1264	1.0545	1.0034	1.0950	NaN	NaN	NaN	NaN	1.0220	NaN	1.0681	1.0822	NaN	NaN	NaN	NaN	NaN	1.1996	NaN	NaN	NaN	NaN	NaN	1.7283	NaN	NaN	NaN
1303	NaN	NaN	1.0023	NaN	NaN	NaN	NaN	NaN	1.2180	0.9425	0.9555	1.1243	1.0722	1.0115	0.9235	NaN	NaN	1.0585	NaN	0.9877	NaN	NaN	1.0062	0.9441	0.7493	0.8376	NaN	NaN	NaN	NaN	1.0746	NaN	1.1754	1.1284	NaN	NaN	NaN	NaN	NaN	0.9811	NaN	NaN	NaN	NaN	NaN	1.7120	NaN	NaN	NaN
1304	NaN	NaN	1.0277	NaN	NaN	NaN	NaN	NaN	1.1842	1.0411	1.2047	1.0791	1.0744	1.0134	1.0070	NaN	NaN	1.0766	NaN	1.0784	NaN	NaN	1.0343	1.0772	1.0428	1.0959	NaN	NaN	NaN	NaN	0.9977	NaN	0.7431	0.7100	NaN	NaN	NaN	NaN	NaN	0.5476	NaN	NaN	NaN	NaN	NaN	1.1430	NaN	NaN	NaN
1305	NaN	NaN	1.0259	NaN	NaN	NaN	NaN	NaN	0.9608	0.8534	1.1133	0.9890	1.0207	0.8895	0.9974	NaN	NaN	1.0859	NaN	1.1736	NaN	NaN	0.9168	1.0617	1.1188	0.9779	NaN	NaN	NaN	NaN	0.8854	NaN	1.3189	1.1950	NaN	NaN	NaN	NaN	NaN	1.1714	NaN	NaN	NaN	NaN	NaN	0.7964	NaN	NaN	NaN
1306	NaN	NaN	1.0393	NaN	NaN	NaN	NaN	NaN	1.0039	1.0071	1.0413	1.0487	1.1233	1.0083	0.9132	NaN	NaN	0.8991	NaN	1.1911	NaN	NaN	1.0914	0.8169	0.9662	0.9214	NaN	NaN	NaN	NaN	1.0912	NaN	0.9961	0.7792	NaN	NaN	NaN	NaN	NaN	0.9603	NaN	NaN	NaN	NaN	NaN	0.9258	NaN	NaN	NaN
1307	NaN	NaN	1.1820	NaN	NaN	NaN	NaN	NaN	0.9457	0.8994	1.1017	0.9422	0.8390	0.9829	0.9083	NaN	NaN	0.9347	NaN	1.0798	NaN	NaN	0.8508	0.9906	0.7321	0.9850	NaN	NaN	NaN	NaN	1.1901	NaN	0.5553	1.0253	NaN	NaN	NaN	NaN	NaN	0.6064	NaN	NaN	NaN	NaN	NaN	0.9327	NaN	NaN	NaN
1308	NaN	NaN	0.9143	NaN	NaN	NaN	NaN	NaN	0.9928	1.0381	0.9862	0.9487	0.9119	0.9409	1.1514	NaN	NaN	0.9181	NaN	0.9554	NaN	NaN	1.1492	1.2167	1.2303	1.2113	NaN	NaN	NaN	NaN	1.1988	NaN	1.6489	1.1539	NaN	NaN	NaN	NaN	NaN	1.3000	NaN	NaN	NaN	NaN	NaN	0.8697	NaN	NaN	NaN
1309	NaN	NaN	0.9220	NaN	NaN	NaN	NaN	NaN	0.7479	0.7222	1.0024	0.7210	0.6932	0.7119	0.8632	NaN	NaN	1.0724	NaN	0.9383	NaN	NaN	0.7196	0.7313	0.7861	0.7746	NaN	NaN	NaN	NaN	0.6097	NaN	0.7393	0.8606	NaN	NaN	NaN	NaN	NaN	1.0363	NaN	NaN	NaN	NaN	NaN	1.0071	NaN	NaN	NaN
1310	NaN	NaN	0.9992	NaN	NaN	NaN	NaN	NaN	1.2258	1.3095	1.1256	1.2596	1.4314	1.1715	1.0215	NaN	NaN	1.0604	NaN	1.0565	NaN	NaN	1.1281	0.7996	1.2093	0.9085	NaN	NaN	NaN	NaN	0.9219	NaN	1.2647	1.0054	NaN	NaN	NaN	NaN	NaN	1.1577	NaN	NaN	NaN	NaN	NaN	1.2097	NaN	NaN	NaN
1311	NaN	NaN	0.9143	NaN	NaN	NaN	NaN	NaN	1.0354	0.9271	0.9307	0.9835	1.1472	1.0222	0.7294	NaN	NaN	1.0371	NaN	1.1888	NaN	NaN	1.0976	0.8388	0.8055	0.7863	NaN	NaN	NaN	NaN	1.0224	NaN	1.2266	1.0937	NaN	NaN	NaN	NaN	NaN	1.0722	NaN	NaN	NaN	NaN	NaN	0.6639	NaN	NaN	NaN
1312	NaN	NaN	1.0961	NaN	NaN	NaN	NaN	NaN	0.9727	1.0115	1.2679	1.0409	0.9069	0.9535	0.9230	NaN	NaN	1.1554	NaN	1.0583	NaN	NaN	0.9272	1.1513	1.1469	1.0265	NaN	NaN	NaN	NaN	0.9777	NaN	0.7164	0.9457	NaN	NaN	NaN	NaN	NaN	0.8114	NaN	NaN	NaN	NaN	NaN	1.5564	NaN	NaN	NaN
1313	NaN	NaN	1.0401	NaN	NaN	NaN	NaN	NaN	1.2349	1.1897	1.0695	1.2521	1.2536	1.2063	1.3178	NaN	NaN	1.1867	NaN	1.1429	NaN	NaN	1.0597	1.0783	1.2118	1.2214	NaN	NaN	NaN	NaN	0.9574	NaN	0.8138	1.0186	NaN	NaN	NaN	NaN	NaN	0.7282	NaN	NaN	NaN	NaN	NaN	1.2004	NaN	NaN	NaN
1314	NaN	NaN	1.0565	NaN	NaN	NaN	NaN	NaN	1.1049	1.0921	0.9930	1.1002	1.0547	1.0747	1.1360	NaN	NaN	1.0348	NaN	1.1166	NaN	NaN	1.1470	1.1892	1.3907	1.1675	NaN	NaN	NaN	NaN	1.1168	NaN	1.2346	1.2011	NaN	NaN	NaN	NaN	NaN	1.1508	NaN	NaN	NaN	NaN	NaN	1.2382	NaN	NaN	NaN
1315	NaN	NaN	1.0812	NaN	NaN	NaN	NaN	NaN	0.7069	0.8285	1.0495	0.8470	0.6998	0.8269	0.8556	NaN	NaN	0.8995	NaN	1.0394	NaN	NaN	0.7205	0.7806	0.8787	0.8829	NaN	NaN	NaN	NaN	0.6615	NaN	0.7842	0.9645	NaN	NaN	NaN	NaN	NaN	0.6961	NaN	NaN	NaN	NaN	NaN	0.6747	NaN	NaN	NaN
1316	NaN	NaN	0.8746	NaN	NaN	NaN	NaN	NaN	0.8810	0.7525	0.7376	0.7477	0.7581	0.8358	0.9167	NaN	NaN	1.0805	NaN	0.9274	NaN	NaN	0.7969	0.8234	0.9595	0.8555	NaN	NaN	NaN	NaN	0.8580	NaN	0.6915	0.8477	NaN	NaN	NaN	NaN	NaN	0.7271	NaN	NaN	NaN	NaN	NaN	0.9684	NaN	NaN	NaN
1317	NaN	NaN	0.9971	NaN	NaN	NaN	NaN	NaN	1.1635	1.2167	1.0889	1.0917	1.0374	1.0725	0.7466	NaN	NaN	1.1045	NaN	0.9640	NaN	NaN	1.1488	0.8921	0.8299	0.8801	NaN	NaN	NaN	NaN	0.8211	NaN	0.9406	1.3073	NaN	NaN	NaN	NaN	NaN	1.1113	NaN	NaN	NaN	NaN	NaN	0.9599	NaN	NaN	NaN
1318	NaN	NaN	0.9780	NaN	NaN	NaN	NaN	NaN	0.9527	1.0544	1.0203	1.0322	0.9255	1.0120	1.0080	NaN	NaN	0.9369	NaN	0.9709	NaN	NaN	1.0779	0.9037	1.0823	0.9956	NaN	NaN	NaN	NaN	1.1398	NaN	1.2700	1.4145	NaN	NaN	NaN	NaN	NaN	1.4713	NaN	NaN	NaN	NaN	NaN	0.9395	NaN	NaN	NaN
1319	NaN	NaN	0.9459	NaN	NaN	NaN	NaN	NaN	1.0025	1.0377	1.1374	1.0099	0.9053	0.9471	0.9317	NaN	NaN	1.1958	NaN	0.9530	NaN	NaN	1.0142	0.9315	1.1206	0.9551	NaN	NaN	NaN	NaN	0.9266	NaN	1.0247	0.7776	NaN	NaN	NaN	NaN	NaN	1.0941	NaN	NaN	NaN	NaN	NaN	1.2551	NaN	NaN	NaN
1320	NaN	NaN	0.9315	NaN	NaN	NaN	NaN	NaN	1.1060	1.0487	0.9325	0.9931	1.1101	0.9962	1.0322	NaN	NaN	1.0091	NaN	0.9597	NaN	NaN	0.8924	1.1243	1.2065	1.1568	NaN	NaN	NaN	NaN	1.0085	NaN	0.7481	0.9340	NaN	NaN	NaN	NaN	NaN	0.8341	NaN	NaN	NaN	NaN	NaN	1.1011	NaN	NaN	NaN
1321	NaN	NaN	1.0514	NaN	NaN	NaN	NaN	NaN	1.1231	1.1445	1.0824	1.0787	1.1543	1.0119	0.7483	NaN	NaN	1.0769	NaN	0.9288	NaN	NaN	0.9984	0.6996	0.6949	0.8668	NaN	NaN	NaN	NaN	0.8962	NaN	1.4112	1.0412	NaN	NaN	NaN	NaN	NaN	1.2348	NaN	NaN	NaN	NaN	NaN	1.5785	NaN	NaN	NaN
1322	NaN	NaN	1.0784	NaN	NaN	NaN	NaN	NaN	1.0516	0.8207	1.0355	0.9929	0.9702	1.0296	0.8144	NaN	NaN	0.8643	NaN	1.0364	NaN	NaN	0.9604	0.8676	0.7773	0.8392	NaN	NaN	NaN	NaN	1.3823	NaN	1.5565	1.1673	NaN	NaN	NaN	NaN	NaN	1.4352	NaN	NaN	NaN	NaN	NaN	0.7510	NaN	NaN	NaN
1323	NaN	NaN	1.0232	NaN	NaN	NaN	NaN	NaN	1.0630	1.0409	1.0887	1.0820	1.0455	1.0198	0.8585	NaN	NaN	0.8270	NaN	1.0210	NaN	NaN	1.0433	0.8837	0.9338	0.9620	NaN	NaN	NaN	NaN	0.6114	NaN	1.2465	1.1382	NaN	NaN	NaN	NaN	NaN	1.1528	NaN	NaN	NaN	NaN	NaN	0.7176	NaN	NaN	NaN
1324	NaN	NaN	0.8745	NaN	NaN	NaN	NaN	NaN	1.0082	0.9631	0.8755	0.8975	0.8249	0.8554	0.7970	NaN	NaN	1.0223	NaN	0.9322	NaN	NaN	0.8924	1.0966	0.9674	0.9847	NaN	NaN	NaN	NaN	0.7232	NaN	0.5369	0.9621	NaN	NaN	NaN	NaN	NaN	0.4346	NaN	NaN	NaN	NaN	NaN	0.7419	NaN	NaN	NaN
1325	NaN	NaN	0.8834	NaN	NaN	NaN	NaN	NaN	1.0301	1.0678	0.8949	1.1007	1.0510	1.0322	1.0897	NaN	NaN	1.0351	NaN	1.0545	NaN	NaN	1.0083	1.0479	0.9181	0.8873	NaN	NaN	NaN	NaN	1.2882	NaN	1.1738	0.9026	NaN	NaN	NaN	NaN	NaN	0.9432	NaN	NaN	NaN	NaN	NaN	0.6040	NaN	NaN	NaN
1326	NaN	NaN	1.1336	NaN	NaN	NaN	NaN	NaN	1.1827	1.1442	1.2270	1.2079	1.1936	1.0763	1.0696	NaN	NaN	0.9761	NaN	1.2085	NaN	NaN	0.9438	0.9797	1.1271	0.9104	NaN	NaN	NaN	NaN	1.1187	NaN	1.2127	0.9794	NaN	NaN	NaN	NaN	NaN	0.9219	NaN	NaN	NaN	NaN	NaN	1.3919	NaN	NaN	NaN
1327	NaN	NaN	1.1568	NaN	NaN	NaN	NaN	NaN	1.1896	1.1717	1.1596	1.2220	1.1399	1.1767	1.1514	NaN	NaN	1.2248	NaN	1.1045	NaN	NaN	1.1085	1.0664	1.2631	1.2172	NaN	NaN	NaN	NaN	1.4683	NaN	1.4251	1.1645	NaN	NaN	NaN	NaN	NaN	1.4112	NaN	NaN	NaN	NaN	NaN	1.2628	NaN	NaN	NaN
1328	NaN	NaN	0.8598	NaN	NaN	NaN	NaN	NaN	1.0138	0.9477	0.9538	1.0588	0.8778	0.9839	1.0796	NaN	NaN	0.8876	NaN	0.9309	NaN	NaN	1.0282	1.1336	1.2782	1.0850	NaN	NaN	NaN	NaN	0.7491	NaN	0.7082	1.0026	NaN	NaN	NaN	NaN	NaN	0.5350	NaN	NaN	NaN	NaN	NaN	0.9382	NaN	NaN	NaN
1329	NaN	NaN	0.9112	NaN	NaN	NaN	NaN	NaN	0.6773	0.8204	0.9802	0.7894	0.7711	0.7103	0.9892	NaN	NaN	0.8600	NaN	1.0003	NaN	NaN	0.7591	0.8882	0.9508	0.8499	NaN	NaN	NaN	NaN	0.7738	NaN	0.8175	1.0830	NaN	NaN	NaN	NaN	NaN	1.0561	NaN	NaN	NaN	NaN	NaN	0.8090	NaN	NaN	NaN
1330	NaN	NaN	1.2198	NaN	NaN	NaN	NaN	NaN	1.1292	1.3005	1.2413	1.3173	1.3284	1.2169	1.1500	NaN	NaN	1.0478	NaN	1.3279	NaN	NaN	1.2025	0.9444	1.0122	1.1191	NaN	NaN	NaN	NaN	0.8651	NaN	1.2598	1.1054	NaN	NaN	NaN	NaN	NaN	1.1544	NaN	NaN	NaN	NaN	NaN	1.6197	NaN	NaN	NaN
1331	NaN	NaN	1.1283	NaN	NaN	NaN	NaN	NaN	1.3115	1.0158	1.1413	1.0279	1.3542	1.0507	1.2529	NaN	NaN	1.2437	NaN	1.1036	NaN	NaN	0.9245	1.0656	1.2439	1.1477	NaN	NaN	NaN	NaN	0.8196	NaN	1.0582	0.8848	NaN	NaN	NaN	NaN	NaN	1.0242	NaN	NaN	NaN	NaN	NaN	1.4922	NaN	NaN	NaN
1332	NaN	NaN	0.9009	NaN	NaN	NaN	NaN	NaN	0.8563	0.8905	0.8424	0.8822	1.0297	0.7927	0.9977	NaN	NaN	1.0735	NaN	0.8797	NaN	NaN	0.7123	0.9171	0.9297	0.8216	NaN	NaN	NaN	NaN	1.3776	NaN	1.1853	0.9536	NaN	NaN	NaN	NaN	NaN	1.2546	NaN	NaN	NaN	NaN	NaN	1.2201	NaN	NaN	NaN
1333	NaN	NaN	0.9007	NaN	NaN	NaN	NaN	NaN	1.0361	1.1877	0.9479	1.2309	1.1985	1.2484	0.8563	NaN	NaN	1.1473	NaN	0.9117	NaN	NaN	1.2831	1.0336	1.3032	1.3576	NaN	NaN	NaN	NaN	0.9510	NaN	0.9289	1.0218	NaN	NaN	NaN	NaN	NaN	0.8048	NaN	NaN	NaN	NaN	NaN	0.7450	NaN	NaN	NaN
1334	NaN	NaN	1.0244	NaN	NaN	NaN	NaN	NaN	0.9502	1.0827	1.0412	1.1022	0.9185	1.0256	1.3226	NaN	1.4470	1.1291	NaN	1.1179	NaN	NaN	1.0293	1.2113	1.3307	1.2785	NaN	NaN	NaN	NaN	0.5322	NaN	0.9858	0.9485	NaN	NaN	NaN	NaN	NaN	1.2489	NaN	NaN	NaN	NaN	NaN	1.0125	NaN	NaN	NaN
1335	NaN	NaN	0.7781	NaN	NaN	NaN	NaN	NaN	0.5230	0.6293	0.8294	0.5243	0.4663	0.4960	1.0731	NaN	0.8507	0.7666	NaN	0.9244	NaN	NaN	0.8338	1.2186	0.9953	0.9034	NaN	NaN	NaN	NaN	0.8547	NaN	0.4119	0.7188	NaN	NaN	NaN	NaN	NaN	0.4289	NaN	NaN	NaN	NaN	NaN	0.2740	NaN	NaN	NaN
1336	NaN	NaN	1.1207	NaN	NaN	NaN	NaN	NaN	0.8962	1.0089	1.1995	0.9601	0.8400	0.8799	0.8982	NaN	1.4671	0.8711	NaN	1.0794	1.0495	NaN	0.7609	0.9599	0.7916	0.9439	NaN	NaN	NaN	NaN	0.8175	NaN	1.2491	0.9896	NaN	NaN	NaN	NaN	NaN	1.2166	NaN	NaN	NaN	NaN	NaN	1.2461	NaN	NaN	NaN
1337	NaN	NaN	1.1488	NaN	NaN	NaN	NaN	NaN	1.2806	1.2862	1.1182	1.2603	1.3616	1.1180	1.0777	NaN	1.6326	1.0258	NaN	0.9154	1.4768	NaN	1.0681	1.1336	1.0623	1.0442	NaN	NaN	NaN	NaN	1.0891	NaN	1.2635	1.3043	NaN	NaN	NaN	NaN	NaN	1.4174	NaN	NaN	NaN	NaN	NaN	1.6573	NaN	NaN	NaN
1338	NaN	NaN	0.9481	NaN	NaN	NaN	NaN	NaN	1.0724	0.9080	1.0261	0.9486	0.7367	1.0466	0.9346	NaN	0.8445	0.4676	NaN	0.8439	0.9515	NaN	0.8883	1.1720	0.9512	0.9695	NaN	NaN	NaN	NaN	0.9088	NaN	1.3422	1.1159	NaN	NaN	NaN	NaN	NaN	1.3188	NaN	NaN	NaN	NaN	NaN	0.7422	NaN	NaN	NaN
1339	NaN	NaN	0.8796	NaN	NaN	NaN	NaN	NaN	0.7985	0.9818	0.9928	0.9192	0.8552	0.9256	0.9647	NaN	1.1892	0.9103	NaN	1.0591	1.1467	NaN	0.8715	1.0479	0.9771	1.0080	NaN	NaN	NaN	NaN	1.0530	NaN	1.2709	1.0166	NaN	0.8285	NaN	NaN	NaN	1.3151	NaN	NaN	NaN	NaN	NaN	0.8852	NaN	NaN	NaN
1340	NaN	NaN	1.0353	NaN	NaN	NaN	NaN	NaN	0.9153	1.0659	1.0941	0.9569	0.9489	0.9759	0.8642	NaN	0.7753	1.0714	NaN	1.0816	0.9043	NaN	0.9043	1.0941	1.0332	1.0360	NaN	NaN	NaN	NaN	1.3380	NaN	0.6342	0.8044	NaN	0.6473	NaN	NaN	NaN	0.5533	NaN	NaN	NaN	NaN	NaN	0.9921	NaN	NaN	NaN
1341	NaN	NaN	1.0787	NaN	NaN	NaN	NaN	NaN	0.9943	1.1798	1.1228	1.1047	1.0340	1.0187	1.0278	NaN	0.8989	1.1440	NaN	1.0419	0.7606	NaN	0.8546	1.1158	1.1095	1.2102	NaN	NaN	NaN	NaN	1.2436	NaN	1.4204	1.0160	NaN	1.7046	NaN	NaN	NaN	1.6568	NaN	NaN	NaN	NaN	NaN	1.0115	NaN	NaN	NaN
1342	NaN	NaN	0.9716	NaN	NaN	NaN	NaN	NaN	1.1519	1.1570	0.9805	1.1213	1.0144	1.1099	0.8310	NaN	1.1366	1.0311	NaN	0.8949	1.4234	NaN	1.0259	0.9126	1.1370	0.8120	NaN	NaN	NaN	NaN	1.2597	NaN	0.7491	1.2941	NaN	1.2154	NaN	NaN	NaN	1.0926	NaN	NaN	NaN	NaN	NaN	0.8415	NaN	NaN	NaN
1343	NaN	NaN	0.9655	NaN	NaN	NaN	NaN	NaN	0.9337	0.9519	1.0122	1.0375	0.9593	0.9581	1.0536	NaN	0.9984	1.1928	NaN	1.0320	1.2991	NaN	1.0603	0.9758	0.8851	0.7970	NaN	NaN	NaN	NaN	0.8859	NaN	0.9451	0.9026	NaN	0.8760	NaN	NaN	NaN	0.8901	NaN	NaN	NaN	NaN	NaN	0.8305	NaN	NaN	NaN
1344	NaN	NaN	1.0255	NaN	NaN	NaN	NaN	NaN	1.1227	1.2312	1.0657	1.1132	1.1361	1.1376	0.9966	NaN	1.1143	1.0946	NaN	1.0095	1.0645	NaN	1.0424	0.9766	0.8132	0.8856	NaN	NaN	NaN	NaN	1.0088	NaN	0.6456	0.9240	NaN	0.8125	NaN	NaN	NaN	0.5457	NaN	NaN	NaN	NaN	NaN	0.9852	NaN	NaN	NaN
1345	NaN	NaN	1.0528	NaN	NaN	NaN	NaN	NaN	1.2073	1.0426	1.0828	1.1085	1.1648	1.0964	1.1856	NaN	1.1468	1.0548	NaN	1.0344	1.1312	NaN	0.9405	0.9580	0.9758	1.0027	NaN	NaN	NaN	NaN	0.8859	NaN	1.0731	1.0460	NaN	1.0438	NaN	NaN	NaN	1.1923	NaN	NaN	NaN	NaN	NaN	0.9646	NaN	NaN	NaN
1346	NaN	NaN	0.9899	NaN	NaN	NaN	NaN	NaN	1.1053	1.1479	1.0051	1.1293	1.1001	1.1140	1.2044	NaN	1.4065	1.0729	NaN	0.8968	1.2825	NaN	1.0495	0.9951	1.1243	1.1342	NaN	NaN	NaN	NaN	0.9716	NaN	1.2100	1.2163	NaN	1.3500	NaN	NaN	NaN	1.3263	NaN	NaN	NaN	NaN	NaN	0.7205	NaN	NaN	NaN
1347	NaN	NaN	0.9582	NaN	NaN	NaN	NaN	NaN	0.8818	0.8994	0.9898	0.9146	1.0001	0.9396	1.0472	NaN	0.8929	0.8545	NaN	0.9454	0.9354	NaN	0.9260	0.9785	1.0546	1.0132	NaN	NaN	NaN	NaN	0.9091	NaN	1.2183	1.1258	NaN	1.4030	NaN	NaN	NaN	1.0987	NaN	NaN	NaN	NaN	NaN	0.6658	NaN	NaN	NaN
1348	NaN	NaN	0.9881	NaN	NaN	NaN	NaN	NaN	0.9188	0.9276	0.9555	0.9328	0.7618	0.8563	0.9153	NaN	1.4782	0.9745	NaN	0.9853	1.3312	NaN	0.8207	0.9516	0.8540	0.9798	NaN	NaN	NaN	NaN	0.9182	NaN	0.9180	1.0600	NaN	0.8697	NaN	NaN	NaN	1.1467	NaN	NaN	NaN	NaN	NaN	1.0226	NaN	NaN	NaN
1349	NaN	NaN	1.1274	NaN	NaN	NaN	NaN	NaN	1.1070	1.2273	1.2123	1.0566	0.9826	1.0668	1.1626	NaN	1.2899	1.0726	NaN	1.0545	1.2605	NaN	0.9504	1.1919	1.2559	1.1039	NaN	NaN	NaN	NaN	1.3193	NaN	1.1949	0.8440	NaN	1.0597	NaN	NaN	NaN	1.1738	NaN	NaN	NaN	NaN	NaN	0.9805	NaN	NaN	NaN
1350	NaN	NaN	0.8471	NaN	NaN	NaN	NaN	NaN	0.9863	1.0191	0.8716	1.0191	0.9987	1.0146	1.0896	NaN	0.5952	0.9147	NaN	0.8644	0.9082	NaN	1.1294	1.2740	0.9984	1.0190	NaN	NaN	NaN	NaN	1.3648	NaN	1.0101	1.0675	NaN	1.1842	NaN	NaN	NaN	1.2570	NaN	NaN	NaN	NaN	NaN	0.9606	NaN	NaN	NaN
1351	NaN	NaN	0.8335	NaN	NaN	NaN	NaN	NaN	0.8700	0.9351	0.8475	0.9622	0.9785	1.0349	0.9182	NaN	0.6652	0.8200	NaN	0.9181	0.5288	NaN	1.0926	0.7543	0.6563	0.8636	NaN	NaN	NaN	NaN	0.5044	NaN	0.5503	0.7551	NaN	0.4943	NaN	NaN	NaN	0.5016	NaN	NaN	NaN	NaN	NaN	0.4776	NaN	NaN	NaN
1352	NaN	NaN	0.7389	NaN	NaN	NaN	NaN	NaN	1.0288	1.1250	0.7070	1.0268	1.0934	1.0980	1.2114	NaN	0.7161	1.1378	NaN	0.8587	0.9798	NaN	1.0913	1.4123	1.2299	1.0239	NaN	NaN	NaN	NaN	1.0571	NaN	0.5600	0.7771	NaN	0.6983	NaN	NaN	NaN	0.5291	NaN	NaN	NaN	NaN	NaN	0.6666	NaN	NaN	NaN
1353	NaN	NaN	1.2152	NaN	NaN	NaN	NaN	NaN	1.0677	1.2406	1.1871	1.1274	1.1352	1.2540	1.1391	NaN	1.2563	1.1126	NaN	1.0978	1.2339	NaN	0.7861	1.0098	0.8398	0.8073	NaN	NaN	NaN	NaN	0.7846	NaN	0.9243	0.8293	NaN	1.3180	NaN	NaN	NaN	0.8830	NaN	NaN	NaN	NaN	NaN	1.2361	NaN	NaN	NaN
1354	NaN	NaN	1.1040	NaN	NaN	NaN	NaN	NaN	0.9470	0.7226	1.0876	0.7285	0.7029	0.7786	0.9195	NaN	1.1108	0.9654	NaN	1.0175	1.1309	NaN	0.8046	1.1747	1.1558	1.0523	NaN	NaN	NaN	NaN	1.2050	NaN	0.6713	0.9260	NaN	0.9139	NaN	NaN	NaN	0.8247	NaN	NaN	NaN	NaN	NaN	0.9956	NaN	NaN	NaN
1355	NaN	NaN	1.0718	NaN	NaN	NaN	NaN	NaN	1.2660	1.2074	1.1153	1.0704	1.0986	1.0058	0.9267	NaN	1.4891	0.9953	NaN	0.9707	0.9896	NaN	1.0672	0.5220	0.5842	0.6877	NaN	NaN	NaN	NaN	0.7051	NaN	0.9646	0.9923	NaN	1.0837	NaN	NaN	NaN	1.0180	NaN	NaN	NaN	NaN	NaN	1.1007	NaN	NaN	NaN
1356	NaN	NaN	1.1587	NaN	NaN	NaN	NaN	NaN	1.2211	1.2971	1.2260	1.2778	1.3343	1.2864	1.1291	NaN	0.7563	1.0474	NaN	1.0219	1.1843	NaN	1.2573	1.0057	1.1570	1.0710	NaN	NaN	NaN	NaN	1.3071	NaN	1.1107	1.0915	NaN	1.3062	NaN	NaN	NaN	0.9318	NaN	NaN	NaN	NaN	NaN	1.1113	NaN	NaN	NaN
1357	NaN	NaN	1.0038	NaN	NaN	NaN	NaN	NaN	1.0733	1.1942	1.0817	1.1153	1.1916	1.0902	0.8872	NaN	1.0449	1.0276	NaN	1.0520	1.2220	NaN	0.9591	0.9492	0.8653	0.9106	NaN	NaN	NaN	NaN	0.8707	NaN	1.0323	1.0775	NaN	1.4316	NaN	NaN	NaN	1.0982	NaN	NaN	NaN	NaN	NaN	0.8325	NaN	NaN	NaN
1358	NaN	NaN	0.8226	NaN	NaN	NaN	NaN	NaN	0.8263	0.7158	0.7714	0.8441	0.6748	0.9069	0.9240	NaN	0.6343	0.7358	NaN	0.8668	0.4829	NaN	0.6737	1.0962	1.0572	0.9278	NaN	NaN	NaN	NaN	0.6440	NaN	0.4940	0.6986	NaN	0.9603	NaN	NaN	NaN	0.5425	NaN	NaN	NaN	NaN	NaN	0.7986	NaN	NaN	NaN
1359	NaN	NaN	0.8811	NaN	NaN	NaN	NaN	NaN	1.1441	1.2784	1.0107	1.1662	1.2349	1.2022	1.1256	NaN	1.3570	1.3392	NaN	0.9690	1.1913	NaN	1.1491	0.8799	0.8114	0.9758	NaN	NaN	NaN	NaN	0.9042	NaN	1.2582	1.3119	NaN	1.2689	NaN	NaN	NaN	1.4137	NaN	NaN	NaN	NaN	NaN	1.2070	NaN	NaN	NaN
1360	NaN	NaN	0.9272	NaN	NaN	NaN	NaN	NaN	0.8157	0.8067	0.9894	0.9117	0.7969	0.8772	1.0352	NaN	0.8480	1.0112	NaN	0.8383	0.8705	NaN	0.8951	1.0619	1.0504	1.1054	NaN	NaN	NaN	NaN	1.0546	0.9224	1.0936	1.0781	NaN	1.2303	NaN	NaN	NaN	1.4612	NaN	NaN	NaN	NaN	NaN	0.4976	NaN	NaN	NaN
1361	NaN	NaN	1.0213	NaN	NaN	NaN	NaN	NaN	0.7438	0.7709	0.9936	0.7606	0.6674	0.7850	1.0591	NaN	0.6694	0.8606	NaN	1.0169	1.0087	NaN	0.6272	0.9782	0.9785	0.9104	NaN	NaN	NaN	NaN	1.0386	1.1438	0.7106	0.9637	NaN	1.1963	NaN	NaN	NaN	1.0245	NaN	NaN	NaN	NaN	NaN	1.0275	NaN	NaN	NaN
1362	NaN	NaN	1.0955	NaN	NaN	NaN	NaN	NaN	1.1871	1.0682	1.1372	0.9995	0.8201	1.0321	1.1977	NaN	0.7547	1.1005	NaN	1.0260	0.9340	NaN	0.8428	1.0776	0.9225	0.9744	NaN	NaN	NaN	NaN	0.7764	1.1065	0.8145	1.0076	NaN	0.6798	NaN	NaN	NaN	0.9259	NaN	NaN	NaN	NaN	NaN	0.9246	NaN	NaN	NaN
1363	NaN	NaN	1.0241	NaN	NaN	NaN	NaN	NaN	1.0470	1.1511	1.1899	1.0587	1.0208	1.1242	0.6912	NaN	1.1038	1.1519	NaN	0.9822	1.1183	NaN	1.1067	0.8872	0.8313	0.9734	NaN	NaN	NaN	NaN	0.9357	1.0368	0.9576	1.0406	NaN	0.7645	NaN	NaN	NaN	1.2026	NaN	NaN	NaN	NaN	NaN	1.1232	NaN	NaN	NaN
1364	NaN	NaN	1.0357	NaN	NaN	NaN	NaN	NaN	0.7782	0.7892	1.0345	0.8337	0.7951	0.8606	0.9102	NaN	1.0693	0.9977	NaN	0.9390	1.2041	NaN	0.7278	1.0918	1.0859	1.1266	NaN	NaN	NaN	NaN	1.0342	1.1195	0.6313	0.7456	NaN	0.8877	NaN	NaN	NaN	1.0227	NaN	NaN	NaN	NaN	NaN	1.0484	NaN	NaN	NaN
1365	NaN	NaN	0.9683	NaN	NaN	NaN	NaN	NaN	0.9126	0.8589	0.8569	0.9007	0.8133	0.8577	0.8820	NaN	0.7059	0.9474	NaN	0.8855	0.4086	NaN	0.9426	0.8690	0.8524	0.8215	NaN	NaN	NaN	NaN	1.0347	1.1549	1.1240	0.8897	NaN	1.0667	NaN	NaN	NaN	0.9931	NaN	NaN	NaN	NaN	NaN	0.6250	NaN	NaN	NaN
1366	NaN	NaN	1.0042	NaN	NaN	NaN	NaN	NaN	1.0560	1.2259	1.0450	1.0779	0.9496	1.0618	1.1684	NaN	1.6202	1.1415	NaN	0.9991	1.2190	NaN	1.0306	1.0377	1.1161	1.0817	NaN	NaN	NaN	NaN	1.3470	0.7725	1.2810	1.1645	NaN	1.1342	NaN	NaN	NaN	1.2723	NaN	NaN	NaN	NaN	NaN	1.2151	NaN	NaN	NaN
1367	NaN	NaN	1.2074	NaN	NaN	NaN	NaN	NaN	1.0250	1.1416	1.1684	1.0129	0.9416	1.0361	0.9271	NaN	0.9160	1.1137	NaN	1.1498	1.0993	NaN	1.0409	0.9876	0.9347	1.0414	NaN	NaN	NaN	NaN	1.2828	0.6476	1.2085	1.1822	NaN	1.0237	NaN	NaN	NaN	1.1913	NaN	NaN	NaN	NaN	NaN	1.2747	NaN	NaN	NaN
1368	NaN	NaN	1.0525	NaN	NaN	NaN	NaN	NaN	1.2479	1.3227	0.9748	1.2783	1.3159	1.3705	1.0345	NaN	1.5228	1.1272	NaN	1.1149	1.0133	NaN	1.4046	0.9744	1.0187	1.0873	NaN	NaN	NaN	NaN	0.9303	0.9952	1.2069	1.1531	NaN	1.1401	NaN	NaN	NaN	1.1556	NaN	NaN	NaN	NaN	NaN	1.0411	NaN	NaN	NaN
1369	NaN	NaN	0.9292	NaN	NaN	NaN	NaN	NaN	1.0480	0.9342	0.9598	1.0365	1.0294	0.9518	1.0812	NaN	0.9417	1.0921	NaN	1.1056	0.9309	NaN	0.9746	1.1608	1.3024	1.0994	NaN	NaN	NaN	NaN	0.7661	1.3284	0.6214	0.6290	NaN	0.9392	NaN	NaN	NaN	0.6592	NaN	NaN	NaN	NaN	NaN	0.7563	NaN	NaN	NaN
1370	NaN	NaN	0.9114	NaN	NaN	NaN	NaN	NaN	0.9186	0.9603	0.9860	0.9717	0.8721	0.9375	1.0121	NaN	0.7545	1.0527	NaN	0.9849	1.1628	NaN	1.0808	1.0609	0.7855	0.8888	NaN	NaN	NaN	NaN	0.9715	1.0415	0.7292	1.0900	NaN	0.8393	NaN	NaN	NaN	1.2150	NaN	NaN	NaN	NaN	NaN	1.1275	NaN	NaN	NaN
1371	NaN	NaN	0.9617	NaN	NaN	NaN	NaN	NaN	0.8664	0.8672	1.0323	0.9389	0.8634	0.7976	0.9192	NaN	0.8355	0.8517	NaN	1.0069	0.6485	NaN	0.9101	0.8172	0.7581	0.8996	NaN	NaN	NaN	NaN	0.8056	0.9178	0.8864	0.9520	NaN	1.2155	NaN	NaN	NaN	0.8865	NaN	NaN	NaN	NaN	NaN	0.7248	NaN	NaN	NaN
1372	NaN	NaN	1.0344	NaN	NaN	NaN	NaN	NaN	1.0474	1.1519	1.0885	1.1095	1.0308	1.1458	1.1573	NaN	1.0539	1.2037	NaN	1.1331	1.1287	NaN	1.0801	1.0930	1.0805	1.2415	NaN	NaN	NaN	NaN	1.0564	0.8043	0.9102	0.8623	NaN	1.3348	NaN	NaN	NaN	0.8738	NaN	NaN	NaN	NaN	NaN	0.7683	NaN	NaN	NaN
1373	NaN	NaN	1.0831	NaN	NaN	NaN	NaN	NaN	0.9732	1.0085	1.0610	1.0193	0.8832	1.0239	1.1718	NaN	1.1138	1.1239	NaN	1.0262	1.2688	NaN	0.9271	1.2775	1.3005	1.1025	NaN	NaN	NaN	NaN	1.1420	1.2343	1.0535	1.1324	NaN	1.1083	NaN	NaN	NaN	1.2355	NaN	NaN	NaN	NaN	NaN	1.0882	NaN	NaN	NaN
1374	NaN	NaN	1.0362	NaN	NaN	NaN	NaN	NaN	1.0868	1.0873	0.9872	1.1666	1.1936	1.2085	1.3000	NaN	1.7235	0.9449	NaN	1.0344	1.2213	NaN	1.1752	1.2169	1.1911	1.2591	NaN	NaN	NaN	NaN	1.2644	1.2931	0.8254	0.7283	NaN	1.2728	NaN	NaN	NaN	0.6834	NaN	NaN	NaN	NaN	NaN	1.0983	NaN	NaN	NaN
1375	NaN	NaN	0.9897	NaN	NaN	NaN	NaN	NaN	0.8890	0.9212	0.9716	0.9185	0.8497	0.9123	0.8165	NaN	0.9767	1.0983	NaN	0.9520	1.1372	NaN	0.8195	1.0367	0.8553	0.9078	NaN	NaN	NaN	NaN	1.0747	1.1648	0.8337	1.0558	NaN	0.4845	NaN	NaN	NaN	0.6996	NaN	NaN	NaN	NaN	NaN	1.2118	NaN	NaN	NaN
1376	NaN	NaN	0.9129	NaN	NaN	NaN	NaN	NaN	0.9862	1.0478	0.9068	1.0962	0.9149	1.0122	1.0965	NaN	0.8659	1.0758	NaN	0.9105	1.3864	NaN	1.0595	1.0328	1.1115	1.0798	NaN	NaN	NaN	NaN	0.7195	1.1080	1.1523	1.2071	NaN	0.7115	NaN	NaN	NaN	1.2417	NaN	NaN	NaN	NaN	NaN	0.7979	NaN	NaN	NaN
1377	NaN	NaN	0.7969	NaN	NaN	NaN	NaN	NaN	0.8309	0.8206	0.7738	0.9274	0.7538	0.9044	0.7091	NaN	0.6394	0.8331	NaN	0.8169	0.5351	NaN	0.9003	0.5718	0.5998	0.5929	NaN	NaN	NaN	NaN	0.7344	1.3256	0.8093	0.8318	NaN	0.8839	NaN	NaN	NaN	0.6941	NaN	NaN	NaN	NaN	NaN	0.5199	NaN	NaN	NaN
1378	NaN	NaN	1.0797	NaN	NaN	NaN	NaN	NaN	1.1576	1.1285	1.1955	1.1361	1.0373	1.1521	1.0172	NaN	0.9848	1.0518	NaN	1.0549	0.8688	NaN	1.1215	1.1284	1.0245	0.9003	NaN	NaN	NaN	NaN	1.0889	0.8426	1.0643	1.0046	NaN	1.1367	NaN	NaN	NaN	1.2169	NaN	NaN	NaN	NaN	NaN	1.1651	NaN	NaN	NaN
1379	NaN	NaN	1.0644	NaN	NaN	NaN	NaN	NaN	0.8511	0.8506	1.1009	0.9062	0.8742	0.8927	1.0561	NaN	0.7165	0.5925	0.9377	1.0753	0.6961	NaN	0.8227	1.2365	1.1527	1.0037	NaN	NaN	NaN	NaN	0.9609	0.8735	0.4957	0.7016	NaN	0.6215	NaN	NaN	NaN	0.5347	NaN	NaN	NaN	NaN	NaN	0.8628	NaN	NaN	NaN
1380	1.4475	NaN	1.0657	NaN	NaN	NaN	NaN	NaN	1.1152	1.1765	1.1572	1.1347	1.1545	1.0790	1.0200	NaN	1.3624	1.4819	0.9579	1.0199	1.0402	NaN	1.0912	0.9010	0.9805	1.0878	NaN	NaN	NaN	NaN	0.7284	1.1231	1.1696	0.9250	NaN	1.0359	NaN	NaN	NaN	1.1896	NaN	NaN	NaN	NaN	NaN	1.4459	NaN	NaN	NaN
1381	1.0759	NaN	1.0414	NaN	NaN	NaN	NaN	NaN	1.3374	1.2631	1.0957	1.3137	1.3273	1.2502	1.1303	NaN	1.0815	1.3465	0.9560	1.0394	1.0870	NaN	1.2800	1.1122	1.3726	1.4484	NaN	NaN	NaN	NaN	1.0107	1.0793	0.8293	0.8700	NaN	1.2569	NaN	NaN	NaN	0.9907	NaN	NaN	NaN	NaN	NaN	1.0434	NaN	NaN	NaN
1382	0.8404	NaN	0.8559	NaN	NaN	NaN	NaN	NaN	1.0484	0.9301	0.8447	1.0510	0.9143	1.0872	1.0286	NaN	0.7071	0.9861	0.9914	0.9613	0.9155	NaN	1.1035	0.9804	1.0640	0.9843	NaN	NaN	NaN	NaN	1.0566	0.7953	0.9362	1.0316	NaN	1.2316	NaN	NaN	NaN	0.8444	NaN	NaN	NaN	NaN	NaN	0.6442	NaN	NaN	NaN
1383	1.8922	NaN	1.0090	NaN	NaN	NaN	NaN	NaN	0.8827	1.0939	1.1014	1.0969	0.9881	1.1118	1.0511	NaN	0.9073	1.0357	0.8652	0.9854	1.0581	NaN	1.0051	0.9626	1.0297	1.1035	NaN	NaN	NaN	NaN	0.9830	1.0716	1.0606	0.9410	NaN	0.8105	NaN	NaN	NaN	1.0035	NaN	NaN	NaN	NaN	NaN	1.0455	NaN	NaN	NaN
1384	0.9199	NaN	0.9446	NaN	NaN	NaN	NaN	NaN	0.8794	0.9722	0.9533	0.9472	0.7459	0.9094	0.9802	NaN	0.8734	0.8852	0.9857	0.8894	0.8298	NaN	0.7827	1.1260	1.2228	0.9553	NaN	NaN	NaN	NaN	0.9130	0.9026	0.7177	0.9025	NaN	0.9181	NaN	NaN	NaN	0.6340	NaN	NaN	NaN	NaN	NaN	0.7690	NaN	NaN	NaN
1385	1.2588	NaN	1.0362	NaN	NaN	NaN	NaN	NaN	1.2440	1.3218	1.0259	1.2717	1.3390	1.3509	1.0708	NaN	1.4034	1.1499	0.9639	1.0212	1.0545	NaN	1.2833	0.9248	1.0795	1.3054	NaN	NaN	NaN	NaN	1.1599	1.2859	1.1649	1.1971	NaN	1.2208	NaN	NaN	NaN	1.3341	NaN	NaN	NaN	NaN	NaN	0.9999	NaN	NaN	NaN
1386	0.7059	NaN	1.0200	NaN	NaN	NaN	NaN	NaN	0.9044	0.8690	0.9798	0.9426	1.0234	0.8995	1.0554	NaN	1.1325	0.8967	1.0954	0.9976	1.0735	NaN	0.9189	1.0004	1.1282	0.9406	NaN	NaN	NaN	NaN	1.3818	1.0418	0.9158	0.9614	NaN	1.1281	NaN	NaN	NaN	1.0919	NaN	NaN	NaN	NaN	NaN	0.6598	NaN	NaN	NaN
1387	0.8140	NaN	0.9609	NaN	NaN	NaN	NaN	NaN	0.9377	0.9817	0.9507	1.0480	1.1038	0.9718	1.1008	NaN	0.6222	1.1150	0.9192	0.8853	0.7323	NaN	1.0520	0.9691	1.1371	1.0721	NaN	NaN	NaN	NaN	0.9041	1.0046	1.2795	1.1231	NaN	0.9591	NaN	NaN	NaN	1.0877	NaN	NaN	NaN	NaN	NaN	1.0519	NaN	NaN	NaN
1388	0.9649	NaN	1.0454	NaN	NaN	NaN	NaN	NaN	1.1421	1.1958	1.0098	1.1939	1.0477	1.1242	1.0921	NaN	0.6529	1.0897	0.8567	0.9723	0.7109	NaN	1.2328	1.1194	1.1963	1.0867	NaN	NaN	NaN	NaN	1.0468	0.8899	0.9079	0.9658	NaN	0.8799	NaN	NaN	NaN	0.9635	NaN	NaN	NaN	NaN	NaN	0.6655	NaN	NaN	NaN
1389	0.9783	NaN	1.1677	NaN	NaN	NaN	NaN	NaN	1.0466	1.0082	1.1623	1.0855	1.0236	1.0699	1.0940	NaN	1.6096	1.2258	0.9560	1.0860	1.1860	NaN	1.0409	1.0760	0.9253	1.1934	NaN	NaN	NaN	NaN	0.5958	0.9789	0.9293	1.0319	NaN	0.7465	NaN	NaN	NaN	0.8117	NaN	NaN	NaN	NaN	NaN	1.3797	NaN	NaN	NaN
1390	0.2857	NaN	0.9128	NaN	NaN	NaN	NaN	NaN	0.5675	0.5584	0.7702	0.5035	0.3914	0.5934	1.0115	NaN	0.6965	1.0039	0.8952	0.9682	0.7967	NaN	0.4682	1.0438	1.0292	0.9053	NaN	NaN	NaN	NaN	0.7323	1.0878	0.4965	0.7362	NaN	0.6827	NaN	NaN	NaN	0.5734	NaN	NaN	NaN	NaN	NaN	0.9570	NaN	NaN	NaN
1391	0.7522	NaN	0.9822	NaN	NaN	NaN	NaN	NaN	0.7804	0.8699	0.9528	0.9426	0.8560	0.8996	0.9221	NaN	0.7441	0.8599	0.9172	1.0314	0.7154	NaN	0.8910	1.0699	1.2104	1.0399	NaN	NaN	NaN	NaN	0.8324	1.1230	1.2725	1.2136	NaN	0.8325	NaN	NaN	NaN	1.1389	NaN	NaN	NaN	NaN	NaN	1.0640	NaN	NaN	NaN
1392	0.9261	NaN	1.0860	NaN	NaN	NaN	NaN	NaN	0.8922	1.0213	1.1443	0.9676	0.8206	0.9563	1.3348	NaN	1.6630	1.2647	1.0029	1.1185	1.0359	NaN	1.0046	0.7979	0.9181	1.1008	NaN	NaN	NaN	NaN	0.9462	0.5498	0.8906	0.9602	NaN	0.6789	NaN	NaN	NaN	0.8886	NaN	NaN	NaN	NaN	NaN	1.0673	NaN	NaN	NaN
1393	0.7941	NaN	0.9779	NaN	NaN	NaN	NaN	NaN	1.1838	1.1248	1.0629	1.2041	1.3105	1.2071	1.1355	NaN	0.9666	1.1946	1.0475	1.0342	1.1055	NaN	1.0549	1.1623	1.0785	0.9424	NaN	NaN	NaN	NaN	1.1290	0.9998	0.9003	0.9835	NaN	1.2068	NaN	NaN	NaN	0.9526	NaN	NaN	NaN	NaN	NaN	1.5507	NaN	NaN	NaN
1394	1.1479	NaN	1.0805	NaN	NaN	NaN	NaN	NaN	1.1642	1.2033	1.0148	1.1693	1.1694	1.1496	1.2949	NaN	1.1946	1.1506	0.9162	1.0277	1.0986	NaN	1.1151	1.3189	1.4704	1.1604	NaN	NaN	NaN	NaN	1.2387	1.2057	1.0826	0.8294	NaN	1.2377	NaN	NaN	NaN	0.9950	NaN	NaN	NaN	NaN	NaN	0.9807	NaN	NaN	NaN
1395	1.0472	NaN	0.9048	NaN	NaN	NaN	NaN	NaN	0.8458	0.8810	0.9112	0.9535	0.8432	0.9983	0.7302	NaN	0.9383	1.0390	1.0111	0.9146	0.8329	NaN	0.9257	0.7955	0.8303	0.7959	NaN	NaN	NaN	NaN	0.9437	1.1604	1.0021	1.0502	NaN	1.1840	NaN	NaN	NaN	0.6866	NaN	NaN	NaN	NaN	NaN	0.7536	NaN	NaN	NaN
1396	1.2851	NaN	0.9259	NaN	NaN	NaN	NaN	NaN	0.8203	0.8375	1.0129	0.7992	0.6773	0.8194	0.8807	NaN	1.1517	0.6840	0.8882	0.9376	0.9259	NaN	0.6493	0.6945	0.6381	0.9372	NaN	NaN	NaN	NaN	0.9173	1.3628	1.1811	0.9572	NaN	1.6649	NaN	NaN	NaN	1.0505	NaN	NaN	NaN	NaN	NaN	1.0768	NaN	NaN	NaN
1397	1.1996	NaN	0.9842	NaN	NaN	NaN	NaN	NaN	0.9621	0.8811	0.9733	0.9445	0.8675	1.0043	0.9505	NaN	1.0874	0.9784	1.0006	1.0196	0.9783	NaN	0.9957	0.8799	0.9257	1.1058	NaN	NaN	NaN	NaN	0.7392	1.5590	1.0381	0.9054	NaN	1.2576	NaN	NaN	NaN	1.0442	NaN	NaN	NaN	NaN	NaN	0.9665	NaN	NaN	NaN
1398	1.0113	NaN	1.0699	NaN	NaN	NaN	NaN	NaN	1.0226	1.0670	0.9928	1.0385	1.0676	1.0595	1.0607	NaN	0.9694	1.0697	1.0448	0.9722	0.9817	NaN	0.9529	1.1139	1.1034	1.1410	NaN	NaN	NaN	NaN	1.0751	1.0694	0.8569	1.0475	NaN	1.1576	NaN	NaN	NaN	1.0615	NaN	NaN	NaN	NaN	NaN	1.0435	NaN	NaN	NaN
1399	0.9146	NaN	1.0504	NaN	NaN	NaN	NaN	NaN	0.9957	1.0109	1.0143	1.0370	0.9915	1.0777	0.9817	NaN	0.7890	1.1518	1.1294	1.0330	1.0301	NaN	1.0183	1.1402	1.0283	1.0569	NaN	NaN	NaN	NaN	0.8551	0.6585	0.7630	0.6982	NaN	0.9685	NaN	NaN	NaN	1.0317	NaN	NaN	NaN	NaN	NaN	1.1419	NaN	NaN	NaN
1400	0.9272	NaN	0.9536	NaN	NaN	NaN	NaN	NaN	0.9271	1.0017	0.9303	0.9971	0.8625	0.9740	0.9214	NaN	0.8395	1.1248	0.8334	0.8536	1.1062	NaN	0.9712	0.9481	1.0150	0.7285	NaN	NaN	NaN	NaN	0.9246	0.8680	1.0726	0.8859	NaN	1.6779	NaN	NaN	NaN	1.1186	NaN	NaN	NaN	NaN	NaN	1.2314	NaN	NaN	NaN
1401	0.7777	NaN	1.0538	NaN	NaN	NaN	NaN	NaN	1.0033	1.0400	0.9671	1.0491	0.9851	1.0375	1.0115	NaN	0.8155	0.9606	0.8265	1.0173	1.4192	NaN	0.9797	0.9063	0.8176	1.0238	NaN	NaN	NaN	NaN	1.0665	0.8243	1.3034	1.2653	NaN	1.5554	NaN	NaN	NaN	1.2559	NaN	NaN	NaN	NaN	NaN	1.2720	NaN	NaN	NaN
1402	0.5366	NaN	0.8625	NaN	NaN	NaN	NaN	NaN	0.9492	0.8852	0.8704	0.9355	0.8742	0.9152	0.8638	NaN	0.6484	1.0147	0.9329	0.9054	0.9399	NaN	1.0631	0.9939	0.9145	0.8902	NaN	NaN	NaN	NaN	1.0818	0.9603	1.0265	1.2147	NaN	1.1099	NaN	NaN	NaN	0.9380	NaN	NaN	NaN	NaN	NaN	0.6888	NaN	NaN	NaN
1403	1.1964	NaN	1.0275	NaN	NaN	NaN	NaN	NaN	1.1635	1.2138	1.0092	1.1767	1.0947	1.1740	0.9312	NaN	0.9690	1.0651	0.9212	0.9397	1.0196	NaN	0.9669	0.9193	0.9104	1.0080	NaN	NaN	NaN	NaN	0.9183	0.7868	1.0265	1.0525	NaN	1.2361	NaN	NaN	NaN	1.1152	NaN	NaN	NaN	NaN	NaN	0.8166	NaN	NaN	NaN
1404	1.0856	NaN	1.1479	NaN	NaN	NaN	NaN	NaN	0.9540	1.0484	1.0144	0.9701	0.8172	0.9181	1.0756	NaN	1.4321	1.0352	0.8895	1.0556	1.1953	NaN	0.8583	1.0502	1.2415	1.2651	NaN	NaN	NaN	NaN	1.3674	1.0611	1.0873	1.0940	NaN	1.0539	NaN	NaN	NaN	0.8544	NaN	NaN	NaN	NaN	NaN	1.1362	NaN	NaN	NaN
1405	0.8845	NaN	1.0307	NaN	NaN	NaN	NaN	NaN	0.7837	0.8344	1.0066	0.8726	0.7803	0.8659	1.0955	NaN	0.7997	0.9110	1.0253	1.0741	0.8631	NaN	0.9152	1.3739	1.4291	1.3139	NaN	NaN	NaN	NaN	1.3912	0.9126	1.3668	1.2383	NaN	1.4172	NaN	NaN	NaN	1.3805	NaN	NaN	NaN	NaN	NaN	0.9564	NaN	NaN	NaN
1406	1.2149	NaN	1.0367	NaN	NaN	NaN	NaN	NaN	1.3351	1.3546	1.0212	1.2723	1.4008	1.2428	0.9372	NaN	0.9187	1.1033	0.9212	0.9624	0.9268	NaN	1.2528	0.8393	0.9747	1.0108	NaN	NaN	NaN	NaN	0.6678	0.9828	0.7601	1.0229	NaN	0.8375	NaN	NaN	NaN	0.6790	NaN	NaN	NaN	NaN	NaN	1.0227	NaN	NaN	NaN
1407	0.3319	NaN	1.0824	NaN	NaN	NaN	NaN	NaN	0.8622	0.9116	0.9351	0.9593	0.8831	0.9718	0.8477	NaN	0.5448	0.5376	0.9562	1.0144	0.7127	NaN	0.9619	0.7381	0.7480	0.7702	NaN	NaN	NaN	NaN	0.7711	1.2208	0.5294	0.7118	NaN	0.7200	NaN	NaN	NaN	0.7523	NaN	NaN	NaN	NaN	NaN	1.0452	NaN	NaN	NaN
1408	0.8445	NaN	0.9530	NaN	NaN	NaN	NaN	NaN	0.7846	0.7958	0.9714	0.9063	0.8368	0.8746	0.8692	NaN	1.2617	1.2846	1.0805	0.8444	1.0394	NaN	0.9492	1.0492	0.9697	0.8584	NaN	NaN	NaN	NaN	1.1666	0.6149	0.6524	0.9968	NaN	0.7941	NaN	NaN	NaN	0.9465	NaN	NaN	NaN	NaN	NaN	1.0180	NaN	NaN	NaN
1409	1.0357	NaN	1.0933	NaN	NaN	NaN	NaN	NaN	0.9647	1.0724	1.1104	1.0542	0.8395	1.0074	1.0404	NaN	0.9892	1.2523	0.9481	0.9963	0.8445	NaN	1.0157	1.1678	1.1316	1.1281	NaN	NaN	NaN	NaN	0.9082	0.8728	0.8673	1.0081	NaN	0.9295	NaN	NaN	NaN	0.8596	NaN	NaN	NaN	NaN	NaN	0.8559	NaN	NaN	NaN
1410	0.8108	NaN	0.7370	NaN	NaN	NaN	NaN	NaN	0.9928	0.9326	0.8181	0.9305	1.0156	0.9860	0.7703	NaN	0.8984	0.9596	1.0053	0.7963	0.9191	NaN	0.8548	0.7752	0.8648	0.8299	NaN	NaN	NaN	NaN	0.9633	0.9110	0.6479	0.7374	NaN	0.7933	NaN	NaN	NaN	0.6765	NaN	NaN	NaN	NaN	NaN	0.8093	NaN	NaN	NaN
1411	1.3300	1.0562	1.0255	NaN	NaN	NaN	NaN	NaN	1.3300	1.3794	1.0928	1.2932	1.1744	1.2551	1.0464	NaN	0.8753	1.0782	1.0567	1.0062	1.0978	NaN	1.1806	1.0430	1.0295	1.2288	NaN	NaN	NaN	NaN	1.1732	1.0613	1.3704	1.1588	NaN	1.3020	NaN	NaN	NaN	1.3061	NaN	NaN	NaN	NaN	NaN	1.1226	NaN	NaN	NaN
1412	1.3547	0.8455	1.1612	NaN	NaN	NaN	NaN	NaN	0.8223	0.8543	1.0904	0.9164	0.6945	0.8784	1.0752	NaN	1.2285	0.9338	1.0549	1.0696	1.1891	NaN	0.8975	1.0605	1.1131	1.0388	NaN	NaN	NaN	NaN	1.1569	1.0007	1.4993	1.1566	NaN	1.2436	NaN	NaN	NaN	1.3330	NaN	NaN	NaN	NaN	NaN	1.1202	NaN	NaN	NaN
1413	0.7741	0.6165	0.9747	NaN	NaN	NaN	NaN	NaN	0.7268	0.6839	0.8460	0.7853	0.7284	0.7487	0.6309	NaN	0.8287	0.4809	0.9512	0.9376	0.4886	NaN	0.7041	0.7506	0.7472	0.7079	NaN	NaN	NaN	NaN	0.7792	0.9605	0.3639	0.6578	NaN	0.7849	NaN	NaN	NaN	0.5512	NaN	NaN	NaN	NaN	NaN	0.6112	NaN	NaN	NaN
1414	1.6757	0.8954	1.0483	NaN	NaN	NaN	NaN	NaN	0.9683	1.1193	1.0301	1.0036	0.9813	1.0502	1.0058	NaN	0.8616	1.2089	0.9025	0.9273	1.2874	0.9320	0.9195	1.1812	1.1453	1.0016	NaN	NaN	NaN	NaN	1.1834	1.0599	1.1406	1.1128	NaN	0.7174	NaN	NaN	NaN	1.1761	NaN	NaN	NaN	NaN	NaN	0.8177	NaN	NaN	NaN
1415	1.0406	0.9887	1.0763	NaN	NaN	NaN	NaN	NaN	1.1595	1.1151	1.0886	1.0972	1.1757	1.0907	0.9647	NaN	1.2876	1.0450	1.0442	1.0214	1.1851	0.9221	1.2796	0.9779	0.8819	0.9587	NaN	NaN	NaN	NaN	1.0464	0.7405	0.9479	0.8819	NaN	0.9684	NaN	NaN	NaN	0.8670	NaN	NaN	NaN	NaN	NaN	0.9551	NaN	NaN	NaN
1416	0.8889	0.9951	0.9911	NaN	NaN	NaN	NaN	NaN	0.9395	0.9219	0.9852	1.0018	0.9525	0.9515	0.8599	NaN	1.5391	1.1638	1.0017	1.0211	1.0654	0.8866	1.0738	0.8891	0.8616	0.8727	NaN	NaN	NaN	NaN	0.8357	0.8886	1.1524	1.0871	NaN	0.6507	NaN	NaN	NaN	1.0745	NaN	NaN	NaN	NaN	NaN	0.9136	NaN	NaN	NaN
1417	0.7437	0.8434	0.8185	NaN	NaN	NaN	NaN	NaN	1.0259	1.0489	0.9026	1.0512	1.0059	1.0301	1.0418	NaN	0.7682	0.9520	0.8865	0.8907	0.9037	0.9469	0.9902	0.9872	1.1258	0.9165	NaN	NaN	NaN	NaN	1.0923	0.9180	1.2404	1.1366	NaN	1.1966	NaN	NaN	NaN	1.2363	NaN	NaN	NaN	NaN	NaN	0.6336	NaN	NaN	NaN
1418	1.0777	1.1482	1.1477	NaN	NaN	NaN	NaN	NaN	0.9182	0.9478	1.0552	0.9619	0.8315	0.9370	1.0577	NaN	1.1288	0.9850	0.9750	1.0435	1.2976	0.9982	0.8960	1.2007	1.3850	1.2614	NaN	NaN	NaN	NaN	0.8653	0.8627	0.8715	0.8889	NaN	0.7231	NaN	0.9494	NaN	0.8475	NaN	NaN	NaN	NaN	NaN	1.1359	NaN	NaN	NaN
1419	0.6244	0.8726	1.0146	NaN	NaN	NaN	NaN	NaN	0.9867	1.1030	0.9851	1.0761	1.0098	1.0463	0.8230	NaN	0.8762	0.9558	0.9399	0.9304	0.8554	0.8999	1.1843	0.7396	0.7782	0.8549	NaN	NaN	NaN	NaN	0.8475	1.1771	0.8885	1.1198	NaN	0.6854	NaN	0.9760	NaN	1.1873	NaN	NaN	NaN	NaN	NaN	0.8876	NaN	NaN	NaN
1420	1.9862	1.8858	1.1562	NaN	NaN	NaN	NaN	NaN	1.1741	1.2463	1.1466	1.1819	1.3652	1.1860	1.3483	NaN	1.3417	1.1433	1.1111	0.9897	1.2564	1.1720	1.1372	1.2575	1.2735	1.2293	NaN	NaN	NaN	NaN	1.1306	1.2671	1.3846	1.1278	NaN	1.1714	NaN	0.9035	NaN	1.2377	NaN	NaN	NaN	NaN	NaN	1.3916	NaN	NaN	NaN
1421	0.8505	0.4817	0.9673	NaN	NaN	NaN	NaN	NaN	0.7593	0.7299	0.8264	0.8997	0.8064	0.8707	1.0534	NaN	0.8795	0.8570	0.9005	0.9722	0.9698	1.0550	0.8698	1.0975	1.2438	0.9680	NaN	NaN	NaN	NaN	1.2539	0.9934	1.2482	0.9889	NaN	1.2395	NaN	1.0485	NaN	0.8498	NaN	NaN	NaN	NaN	NaN	1.2286	NaN	NaN	NaN
1422	1.3028	0.7882	1.0237	NaN	NaN	NaN	NaN	NaN	1.1696	1.2223	1.0351	1.1707	1.2464	1.2205	1.2803	1.2110	1.0550	0.8519	0.9572	1.0609	0.9166	0.9548	1.2265	1.1319	1.1237	1.1974	NaN	NaN	NaN	NaN	0.8363	1.0461	1.3095	1.1326	NaN	1.0135	NaN	1.2033	NaN	1.4582	NaN	NaN	NaN	NaN	NaN	1.2012	NaN	NaN	NaN
1423	1.1582	1.0631	0.9409	NaN	NaN	NaN	NaN	NaN	1.0109	1.0591	1.0001	1.1092	1.0627	1.0468	1.2218	1.2923	0.9683	1.1345	0.9857	0.9558	0.9344	0.9524	1.1677	1.3140	1.1110	1.3014	NaN	NaN	NaN	NaN	1.0307	0.9575	1.2162	1.0990	NaN	0.7264	NaN	0.9446	NaN	0.9736	NaN	NaN	NaN	NaN	NaN	1.1747	NaN	NaN	NaN
1424	1.3388	1.1493	1.0622	NaN	NaN	NaN	NaN	NaN	1.0821	0.9983	1.0351	1.0870	1.0994	0.9924	0.9363	0.9898	1.4810	1.0890	1.2234	1.0463	1.0691	0.8936	1.2069	1.1207	0.9860	1.0609	NaN	NaN	NaN	NaN	1.1185	0.8529	0.9493	0.8791	0.7294	0.8690	NaN	1.0600	NaN	0.9649	NaN	NaN	NaN	NaN	NaN	1.1363	NaN	NaN	NaN
1425	0.6649	0.6523	0.8958	NaN	NaN	NaN	NaN	NaN	0.9635	0.8962	0.8532	0.9287	0.8767	0.8780	0.7122	0.8180	1.1411	0.8041	0.8835	0.8765	1.0160	0.8559	1.0014	0.6748	0.7800	0.7014	NaN	NaN	NaN	NaN	1.2232	1.1116	0.5914	0.7709	0.9477	0.9536	NaN	1.1612	NaN	0.5609	NaN	NaN	NaN	NaN	NaN	1.0963	NaN	NaN	NaN
1426	0.8298	0.7375	0.9377	NaN	NaN	NaN	NaN	NaN	0.9661	0.8415	0.8160	0.9000	0.8066	0.9076	0.7211	0.9608	0.7882	1.0644	1.0225	0.8759	0.9095	0.8706	0.8615	0.7117	0.7440	0.6608	NaN	NaN	NaN	NaN	0.8643	0.9492	1.0844	0.9255	0.7540	0.6593	NaN	0.7593	NaN	0.9901	NaN	NaN	NaN	NaN	NaN	0.8073	NaN	NaN	NaN
1427	0.9526	1.0153	1.0500	NaN	NaN	NaN	NaN	NaN	0.9809	1.0733	1.0593	0.9831	0.8326	0.9765	1.1211	0.9902	0.7747	1.0732	0.9508	0.9236	1.0317	0.9915	0.9238	1.1291	1.0420	1.0101	NaN	NaN	NaN	NaN	1.3949	1.0172	0.9965	0.9735	1.1190	1.0973	NaN	1.0017	NaN	1.1906	NaN	NaN	NaN	NaN	NaN	1.6541	NaN	NaN	NaN
1428	0.8982	1.1853	0.8939	NaN	NaN	NaN	NaN	NaN	1.0606	1.1227	0.9292	1.0548	1.0586	1.0343	1.2211	0.8211	1.0841	1.1669	0.9246	0.9341	1.0697	1.0806	1.1743	1.2353	1.2865	1.1928	NaN	NaN	NaN	NaN	0.2856	0.7708	0.4435	0.7402	0.5960	0.3890	NaN	0.9457	NaN	0.4565	NaN	NaN	NaN	NaN	NaN	1.2302	NaN	NaN	NaN
1429	0.8529	1.7088	1.0622	NaN	NaN	NaN	NaN	NaN	1.0658	1.0412	1.1122	1.1122	1.0031	1.1362	1.2020	0.9386	0.6496	1.0512	0.8670	1.1189	1.0575	1.0194	1.0233	0.9995	1.1310	1.0458	NaN	NaN	NaN	NaN	1.2126	1.1044	1.2498	1.0259	0.8704	1.3024	NaN	0.7264	NaN	1.1684	NaN	NaN	NaN	NaN	NaN	1.3734	NaN	NaN	NaN
1430	0.5685	0.6478	0.9742	NaN	NaN	NaN	NaN	NaN	0.7667	0.7657	1.0229	0.9102	0.9188	0.9430	0.9365	0.8919	0.6130	0.7806	0.9601	0.8237	0.7783	0.9278	0.8714	0.9000	0.9504	0.9297	NaN	NaN	NaN	NaN	1.2856	0.5650	1.2169	1.0317	1.0030	1.0193	NaN	0.9260	NaN	0.9972	NaN	NaN	NaN	NaN	NaN	0.9531	NaN	NaN	NaN
1431	0.6447	0.8992	1.0577	NaN	NaN	NaN	NaN	NaN	0.8715	0.8876	1.0133	0.9479	0.8842	0.9922	0.7887	0.9532	0.8446	0.9781	1.0142	1.0276	0.9574	0.8969	0.9474	0.7923	0.7650	0.8041	NaN	NaN	NaN	NaN	0.9742	0.7321	1.1847	1.0198	1.1490	1.1391	NaN	1.1152	NaN	1.0259	NaN	NaN	NaN	NaN	NaN	0.8624	NaN	NaN	NaN
1432	0.8976	1.0958	1.0321	NaN	NaN	NaN	NaN	NaN	0.9165	0.9258	0.9864	0.9435	0.9110	0.8929	0.9462	1.0074	0.9394	0.8708	0.9662	1.0272	0.9786	1.0231	1.0439	0.8241	0.8147	0.8869	NaN	NaN	NaN	NaN	0.9140	0.7493	0.5912	0.8018	0.8352	0.7912	NaN	0.9021	NaN	0.5976	NaN	NaN	NaN	NaN	NaN	1.1236	NaN	NaN	NaN
1433	1.5450	2.0292	1.1000	NaN	NaN	NaN	NaN	NaN	0.8875	0.9479	1.0343	0.9142	0.8164	0.9000	1.0772	0.8137	1.3776	1.3050	1.1374	1.0528	1.0212	0.7639	0.8693	1.0767	0.9352	1.1224	NaN	NaN	NaN	NaN	0.9137	0.9057	1.2096	1.0511	0.9179	0.8469	NaN	1.0206	NaN	0.9552	NaN	NaN	NaN	NaN	NaN	1.0038	NaN	NaN	NaN
1434	0.7169	0.6316	1.0348	NaN	NaN	NaN	NaN	NaN	0.9751	0.9365	0.9400	1.0542	1.0720	1.0016	1.0015	0.8182	0.6915	0.8195	0.8947	0.9901	0.5773	0.8160	0.8841	1.0330	1.0055	0.9887	NaN	NaN	NaN	NaN	1.1427	0.8245	0.9581	0.7850	1.0751	0.9562	NaN	0.9702	NaN	1.2372	NaN	NaN	NaN	NaN	NaN	0.9284	NaN	NaN	NaN
1435	1.2107	0.8454	0.9434	NaN	NaN	NaN	NaN	NaN	1.0424	1.1748	0.9416	1.0769	0.9414	1.1251	1.0423	0.9827	0.6631	0.9942	0.8961	0.9907	1.1209	0.9784	1.1220	1.2138	1.2361	1.3813	NaN	NaN	NaN	NaN	1.3302	0.9848	1.3712	1.0843	1.2876	1.1142	NaN	0.8725	NaN	1.3128	NaN	NaN	NaN	NaN	NaN	0.8231	NaN	NaN	NaN
1436	1.6856	1.2522	1.0175	NaN	NaN	NaN	NaN	NaN	1.1052	1.0704	1.1329	1.0701	1.0412	1.0220	0.9884	0.9875	1.0634	1.0440	0.9956	1.0029	1.1010	1.0663	1.2270	0.7724	0.7764	0.8030	NaN	NaN	NaN	NaN	0.5892	0.8282	0.9102	0.8553	1.0728	0.8480	NaN	1.0809	NaN	0.9164	NaN	NaN	NaN	NaN	NaN	0.9199	NaN	NaN	NaN
1437	1.2265	1.0865	1.0193	NaN	NaN	NaN	NaN	NaN	0.9469	0.9037	0.8999	0.8649	0.9666	0.8995	0.9787	0.9479	1.0026	1.0232	1.0777	1.0438	0.9757	1.1212	1.0899	0.8596	0.8751	1.0431	NaN	NaN	NaN	NaN	0.9655	1.0403	0.8538	0.9314	0.9657	1.0348	NaN	0.8994	NaN	0.9176	NaN	NaN	NaN	NaN	NaN	1.1207	NaN	NaN	NaN
1438	1.2125	0.8274	0.9675	NaN	NaN	NaN	NaN	NaN	0.8676	0.8934	1.0257	0.9156	0.9487	0.8898	0.9598	0.9165	1.1953	0.8999	1.2699	0.8934	1.1258	0.9391	0.8894	0.8501	0.8602	0.7461	NaN	NaN	NaN	NaN	1.0148	0.8769	1.3228	1.0076	1.0429	1.1841	NaN	0.9326	NaN	1.1891	NaN	NaN	NaN	NaN	NaN	1.0128	NaN	NaN	NaN
1439	1.0803	1.5252	0.9263	NaN	NaN	NaN	NaN	NaN	0.8975	0.9643	0.9714	0.9800	1.0158	0.9284	1.1102	1.0500	0.6952	0.9505	0.8702	1.0313	1.1630	0.9377	1.0026	1.0937	0.9871	0.9987	NaN	NaN	NaN	NaN	0.5805	0.8460	0.6036	0.9652	1.0463	0.5697	NaN	0.9224	NaN	0.7996	NaN	NaN	NaN	NaN	NaN	1.5191	NaN	NaN	NaN
1440	1.5110	1.3386	1.1293	NaN	NaN	NaN	NaN	NaN	1.1672	1.1842	1.0405	1.1146	1.1352	1.1358	1.3414	1.1029	1.0785	0.8951	1.0046	1.0649	0.9428	0.9149	1.3014	1.1911	1.0059	1.2486	NaN	NaN	NaN	NaN	1.1895	0.9016	1.4829	1.2038	1.1476	1.0474	NaN	1.0290	NaN	1.5446	NaN	NaN	NaN	NaN	NaN	0.9659	NaN	NaN	NaN
1441	1.3189	1.7045	1.0378	NaN	NaN	NaN	NaN	NaN	0.9714	1.0674	1.0846	1.0285	0.9022	0.9718	1.0344	0.9948	1.8666	1.2276	1.2659	1.0809	1.3143	0.9489	0.8711	0.9629	1.0531	0.9735	NaN	NaN	NaN	NaN	0.9988	0.9687	1.2660	1.1909	1.3521	1.1137	NaN	0.8279	NaN	1.3329	NaN	NaN	NaN	NaN	NaN	1.2218	NaN	NaN	NaN
1442	1.0488	1.0223	0.8658	NaN	NaN	NaN	NaN	NaN	0.9099	0.8900	0.8590	0.9506	0.9924	0.9047	0.8717	0.9440	1.2482	0.8920	1.3179	0.8448	1.0810	1.1335	0.9000	0.8827	1.0273	0.9290	NaN	NaN	NaN	NaN	1.2459	1.2518	1.5099	1.2586	1.1456	1.2490	NaN	0.7862	NaN	1.2994	NaN	NaN	NaN	NaN	NaN	1.1745	NaN	NaN	NaN
1443	1.1377	0.9974	0.9432	NaN	NaN	NaN	NaN	NaN	0.9035	0.9073	0.8805	0.9082	0.8575	0.9312	1.0585	0.8551	0.9766	1.0607	1.2307	0.9430	0.6402	1.4561	0.9778	1.3491	1.2409	1.1901	NaN	NaN	NaN	NaN	0.8578	0.9706	1.0041	0.8954	0.8353	1.1907	NaN	0.6241	NaN	0.8224	NaN	NaN	NaN	NaN	NaN	0.8701	NaN	NaN	NaN
1444	0.5283	0.5953	0.9734	NaN	NaN	NaN	NaN	NaN	0.9111	0.9222	1.0083	0.9354	0.9999	0.9553	0.9916	0.9702	0.3876	0.8079	0.8486	0.9938	0.7243	1.1281	0.9018	1.3091	1.2070	1.2797	NaN	NaN	NaN	NaN	0.9814	1.0946	0.5441	0.9044	0.8794	0.8175	NaN	0.8815	NaN	0.5102	NaN	NaN	NaN	NaN	NaN	0.4771	NaN	NaN	NaN
1445	1.3835	1.4639	1.2388	NaN	NaN	NaN	NaN	NaN	0.9511	0.9964	1.1424	1.0766	1.0205	1.0435	1.0235	0.9844	0.8854	1.2161	1.0102	1.1303	0.9901	0.8981	0.9991	0.9958	0.6440	0.9762	NaN	NaN	NaN	NaN	1.1287	1.1347	1.4276	1.1793	1.1077	1.0189	NaN	0.9655	NaN	1.2610	NaN	NaN	NaN	NaN	NaN	0.8868	NaN	NaN	NaN
1446	1.0944	0.7439	1.0618	NaN	NaN	NaN	NaN	NaN	0.9628	0.9195	0.9810	0.9602	1.0650	0.9311	0.7726	1.1475	0.7338	0.8885	0.8726	0.9859	0.8612	1.4621	1.0473	0.8648	0.9589	0.8344	NaN	NaN	NaN	NaN	1.0432	1.1013	1.0214	0.7671	1.1130	1.2229	NaN	1.1189	NaN	1.1118	NaN	NaN	NaN	NaN	NaN	0.9575	NaN	NaN	NaN
1447	0.8833	0.8931	0.9550	NaN	NaN	NaN	NaN	NaN	1.1618	1.1326	0.9570	1.1977	1.2149	1.1436	1.0516	0.9866	0.8341	0.9385	1.2163	0.9946	0.9641	1.3925	1.2539	1.0521	0.9478	1.0898	NaN	NaN	NaN	NaN	1.1092	1.0992	1.3335	1.3659	0.9661	1.2349	NaN	1.0858	NaN	1.2007	NaN	NaN	NaN	NaN	NaN	1.1531	NaN	NaN	NaN
1448	1.1866	0.9428	1.0002	NaN	NaN	NaN	NaN	NaN	0.7620	0.7649	0.9283	0.8419	0.8141	0.8518	1.0027	0.9414	0.7264	0.8401	1.0556	1.0290	1.0228	1.0237	0.6583	1.0857	0.8451	0.8611	NaN	NaN	NaN	NaN	1.0666	0.5269	1.1112	1.1156	1.2039	0.9942	NaN	1.1052	NaN	1.1205	NaN	NaN	NaN	NaN	NaN	1.1204	NaN	NaN	NaN
1449	1.3189	1.0183	0.9872	NaN	NaN	NaN	NaN	NaN	1.1949	1.1527	0.9662	1.0905	1.1921	1.0478	0.9553	0.9283	1.1187	0.9223	1.1677	1.0870	0.8794	1.1404	1.1849	1.0678	0.5652	0.9086	NaN	NaN	NaN	NaN	0.8397	0.7795	1.3840	1.2982	1.0594	1.1946	NaN	0.9493	NaN	1.1273	NaN	NaN	NaN	NaN	NaN	0.7321	NaN	NaN	NaN
1450	0.8556	0.6020	0.9499	NaN	NaN	NaN	NaN	NaN	0.9309	0.9775	1.0403	0.9165	0.9465	0.9387	1.0318	1.1042	0.7005	0.7506	0.8452	1.0577	0.9023	1.2313	0.9462	0.9841	0.7383	0.9434	NaN	NaN	NaN	NaN	1.0391	1.0767	1.1305	1.1922	0.8096	1.0369	NaN	1.2934	NaN	0.9548	NaN	NaN	NaN	NaN	NaN	0.9825	NaN	NaN	NaN
1451	1.0989	0.9312	0.8886	NaN	NaN	NaN	NaN	NaN	0.9342	1.0374	0.9903	0.9760	1.0781	0.9753	0.8410	0.7742	1.1983	1.1468	1.0678	0.9385	1.0474	0.9594	1.1043	0.7779	0.9795	0.8985	NaN	NaN	NaN	NaN	1.0627	1.0605	1.0775	0.8067	1.0080	1.3153	NaN	1.1272	NaN	0.9185	NaN	NaN	NaN	NaN	NaN	1.1294	NaN	NaN	NaN
1452	0.4847	0.6637	0.9697	NaN	NaN	NaN	NaN	NaN	0.8606	0.8551	0.9136	0.9113	0.8599	0.9849	0.9437	0.8025	0.6247	0.9047	0.9404	0.9027	0.6461	0.7662	0.8699	0.9186	1.0528	0.9240	NaN	NaN	NaN	NaN	0.9115	1.1762	0.8591	0.8555	1.0954	0.8238	NaN	1.2042	NaN	0.8219	NaN	NaN	NaN	NaN	NaN	0.3248	NaN	NaN	NaN
1453	0.8735	0.7432	1.0568	NaN	NaN	NaN	NaN	NaN	1.0939	1.0330	0.9999	1.0793	1.0895	1.0381	0.9620	1.0120	1.2092	1.1962	1.0389	1.0535	1.2260	1.0038	1.0135	1.0171	0.9380	1.0856	NaN	NaN	NaN	1.1186	0.8600	0.9531	1.0408	0.9674	1.2232	1.0821	NaN	1.0778	NaN	0.8955	NaN	NaN	NaN	NaN	NaN	1.0023	NaN	NaN	NaN
1454	1.0211	0.8044	0.9850	NaN	NaN	NaN	NaN	NaN	0.7595	0.9549	0.9231	0.8995	0.8668	0.8228	0.8836	0.9901	0.7451	1.0594	1.0671	0.9507	0.9361	1.2613	0.8311	1.0724	0.9827	0.9677	NaN	NaN	NaN	1.2460	1.0326	1.4459	0.6364	1.0744	0.7677	0.7154	NaN	1.3973	NaN	0.8745	NaN	NaN	NaN	NaN	NaN	0.7194	NaN	NaN	NaN
1455	1.2322	1.2689	0.9566	NaN	NaN	NaN	NaN	NaN	1.1010	0.9863	1.0079	1.1055	1.0109	1.0026	1.0212	0.9596	1.3564	1.0174	1.2001	0.9286	1.0076	1.0097	1.0374	0.9746	0.9508	1.0006	NaN	NaN	NaN	1.2041	0.8457	0.9368	1.0184	0.8788	1.2510	0.8146	NaN	0.8381	NaN	1.0774	NaN	NaN	NaN	NaN	NaN	1.4002	NaN	NaN	NaN
1456	0.7462	0.7318	0.8516	NaN	NaN	NaN	NaN	NaN	0.7299	0.6966	0.9590	0.8017	0.8308	0.8356	0.9788	0.6717	0.7762	0.9428	0.9202	0.9076	0.9750	1.0256	0.7721	0.9732	0.9696	0.9091	NaN	NaN	NaN	1.0655	1.1850	1.2389	1.0922	1.0821	1.2991	1.0383	NaN	1.0608	NaN	1.1520	NaN	NaN	NaN	NaN	NaN	0.7889	NaN	NaN	NaN
1457	1.0681	0.8272	0.8980	NaN	NaN	NaN	NaN	NaN	0.8074	0.7955	0.9014	0.8599	0.8917	0.9192	1.0532	1.0989	0.8808	0.8508	0.9092	0.9789	0.7491	0.8666	0.8501	1.1261	1.1528	1.0366	NaN	NaN	NaN	1.1653	1.3453	1.0233	0.9841	0.9426	0.9180	1.0143	NaN	0.9858	NaN	1.1657	NaN	NaN	NaN	NaN	NaN	0.6188	NaN	NaN	NaN
1458	1.4438	1.0325	1.1389	NaN	NaN	NaN	NaN	NaN	0.8299	0.9186	1.1239	0.9236	0.9226	0.9157	0.7921	1.2341	1.1100	1.1379	1.0200	0.9880	1.1734	1.2741	0.7392	0.7724	0.8153	0.6851	NaN	NaN	NaN	0.6393	0.8877	1.0432	0.8525	0.9547	0.7380	0.9522	NaN	1.1195	NaN	0.6162	NaN	NaN	NaN	NaN	NaN	1.1975	NaN	NaN	NaN
1459	0.5259	0.6480	0.9473	NaN	NaN	NaN	NaN	NaN	0.9541	0.9544	0.9331	0.9635	0.9578	0.9739	0.7884	0.9022	0.7468	1.0471	0.8889	0.9256	0.7888	0.7814	0.9110	0.8912	0.8068	0.7872	NaN	NaN	NaN	0.2781	0.9220	0.8902	0.8862	1.1440	0.8147	1.0903	NaN	0.8080	NaN	0.7793	NaN	NaN	NaN	NaN	NaN	0.6842	NaN	NaN	NaN
1460	1.0342	0.9792	1.1404	NaN	NaN	NaN	NaN	NaN	0.9556	0.9917	1.0627	0.9688	1.0074	0.9535	1.2312	1.0389	0.6745	0.9219	0.9268	1.0618	0.8122	0.7602	0.9100	1.2051	0.8981	1.0043	NaN	NaN	NaN	1.2056	1.0742	0.9367	0.8676	1.0893	0.9824	1.0206	NaN	1.2399	NaN	0.9425	NaN	NaN	NaN	NaN	NaN	0.7271	NaN	NaN	NaN
1461	0.7514	1.0993	0.9705	NaN	NaN	NaN	NaN	NaN	1.1783	1.1241	0.9328	1.0386	1.0451	1.0174	1.0380	0.8872	1.1557	1.2153	0.9833	0.9878	1.0747	0.9445	1.0727	1.0189	1.1355	1.0007	NaN	NaN	NaN	1.2054	1.1463	1.0993	1.0572	1.0649	0.8689	1.2384	NaN	0.9075	NaN	1.0424	NaN	NaN	NaN	NaN	NaN	1.0091	NaN	1.0962	NaN
1462	1.2876	1.3101	1.1074	NaN	NaN	NaN	NaN	NaN	0.8600	0.8987	1.1089	0.8951	0.9619	0.8821	1.1561	1.3025	1.2591	1.1165	1.0683	1.0184	1.0639	1.0238	0.8928	1.1715	1.1245	1.2015	NaN	NaN	NaN	1.1914	1.4276	1.1684	1.0048	0.9341	1.2237	1.4824	NaN	1.1571	NaN	1.0729	NaN	NaN	NaN	NaN	NaN	1.6275	NaN	1.3152	NaN
1463	0.8804	1.1804	0.9561	NaN	NaN	NaN	NaN	NaN	1.0582	1.0815	0.9199	1.1310	1.1267	1.1369	1.0538	1.2069	0.8598	1.1647	1.0067	1.0567	0.7609	0.8472	1.2156	1.0263	1.1273	1.0284	NaN	NaN	NaN	0.9952	0.9209	1.2185	1.2906	1.1482	1.1577	1.3199	NaN	1.0878	NaN	1.1845	NaN	NaN	NaN	NaN	NaN	0.9555	NaN	0.9945	NaN
1464	0.6837	0.8875	0.9736	NaN	NaN	NaN	NaN	NaN	0.8476	0.8874	0.9576	0.8887	0.8463	0.9148	0.7384	0.9484	0.6125	0.7628	0.7927	0.9840	0.7806	0.8389	0.8889	0.8986	0.7767	0.8692	NaN	NaN	NaN	1.1029	0.7558	0.6486	0.9739	0.9964	0.8398	1.0079	NaN	0.7519	NaN	0.9429	NaN	NaN	NaN	NaN	NaN	0.5496	NaN	1.2254	NaN
1465	0.7804	0.7318	1.0569	NaN	NaN	NaN	NaN	NaN	1.0255	0.9786	0.9807	0.9929	1.1037	1.0208	1.0019	1.0979	0.7805	0.8461	0.8479	1.0378	0.6868	0.9432	1.0464	1.1649	1.1980	1.1265	NaN	NaN	NaN	1.2023	1.3089	1.1180	0.5474	0.8067	0.8611	0.5518	NaN	1.0672	NaN	0.6160	NaN	NaN	NaN	NaN	NaN	0.6738	NaN	0.9981	NaN
1466	1.5268	1.2447	0.9977	NaN	NaN	NaN	NaN	NaN	1.0948	1.1537	0.9649	1.0693	1.0655	1.0072	1.0380	0.9194	1.3492	1.3246	1.1178	1.0151	1.1713	1.1298	0.9526	0.8492	0.8359	0.8943	NaN	NaN	NaN	0.8492	0.6249	0.6554	1.1231	1.0534	0.4872	0.8190	NaN	0.7977	NaN	0.9435	NaN	NaN	NaN	NaN	NaN	0.9048	NaN	1.4041	NaN
1467	1.6000	1.5338	1.1553	NaN	NaN	NaN	NaN	NaN	1.1262	1.1671	1.0865	1.1314	1.1209	1.1509	1.1196	1.1262	1.4293	1.1657	1.3795	1.0411	1.2517	1.2059	1.0809	0.9671	1.2264	1.0225	NaN	NaN	NaN	1.0724	1.1129	0.9901	1.0652	1.0706	0.8882	1.0730	NaN	1.0475	NaN	1.0558	NaN	NaN	NaN	NaN	NaN	1.1462	NaN	0.8391	NaN
1468	0.5281	0.6879	0.8949	NaN	NaN	NaN	NaN	NaN	0.7183	0.6598	0.8560	0.6608	0.6276	0.6764	0.6523	0.5154	0.6451	1.0133	0.9992	0.7555	0.7995	0.6381	0.7787	0.8829	0.7916	0.6668	NaN	NaN	NaN	0.7093	1.0996	0.9615	0.8429	0.8590	0.7647	0.8084	NaN	1.2060	NaN	0.7689	NaN	NaN	NaN	NaN	NaN	0.5989	NaN	0.9830	NaN
1469	1.2664	1.0405	0.9327	NaN	NaN	NaN	NaN	NaN	1.1526	1.1115	1.0638	1.1484	1.3377	1.1851	1.1666	1.0866	1.1525	1.0561	1.0623	1.0090	1.0626	1.1341	1.1872	1.1384	1.0544	1.0905	NaN	NaN	NaN	1.1282	1.1021	1.1677	1.2902	1.1728	1.1876	1.2778	0.8519	1.1087	NaN	1.0377	NaN	NaN	NaN	NaN	NaN	1.2996	NaN	1.5087	NaN
1470	1.6759	1.2335	1.0502	NaN	NaN	1.1354	NaN	NaN	1.1124	1.1023	1.0101	0.9688	1.0331	1.0317	1.2998	1.1927	1.4685	1.0616	1.1316	1.0908	1.2758	1.1324	1.0295	1.0032	1.3002	1.1068	NaN	NaN	NaN	1.1907	1.3953	1.0931	1.3678	1.1123	1.2955	1.3932	0.8014	1.1962	NaN	1.2187	NaN	NaN	NaN	NaN	NaN	0.7986	NaN	1.7300	NaN
1471	1.1794	1.0728	1.0923	NaN	NaN	1.3800	NaN	NaN	0.8170	0.8218	0.9360	0.9347	0.9158	0.9369	1.0031	1.2049	0.7393	0.9111	0.8251	1.0780	1.0002	1.1188	0.9140	0.8628	0.9395	0.9392	NaN	NaN	NaN	1.1162	0.8628	1.2576	0.7469	0.8719	1.1880	0.7737	1.0560	0.9774	NaN	1.1090	NaN	NaN	NaN	NaN	NaN	1.1547	NaN	0.7689	NaN
1472	0.7763	0.8264	0.9837	NaN	NaN	1.2916	NaN	NaN	0.7030	0.6969	0.9633	0.8042	0.6752	0.7592	1.1126	1.0692	1.2819	1.0256	1.2661	1.0497	1.0327	0.8555	0.7619	1.0656	1.1113	1.0538	NaN	NaN	NaN	1.2141	1.0937	1.1598	1.2991	1.0935	1.0515	0.9089	1.1704	1.0582	NaN	1.0679	NaN	NaN	NaN	NaN	NaN	0.6257	NaN	1.3990	NaN
1473	0.8266	0.8812	0.9025	NaN	NaN	0.8939	NaN	NaN	0.8304	0.8323	0.9204	0.8769	0.8972	0.8713	0.9177	1.0815	0.8313	0.8067	1.0394	0.9631	0.9971	0.9672	0.8778	0.8219	0.9127	0.8510	NaN	NaN	NaN	1.1487	1.0281	1.0424	0.9379	0.8878	1.0312	0.7889	0.9907	1.0699	NaN	0.9406	NaN	NaN	NaN	NaN	NaN	0.9632	NaN	0.7642	NaN
1474	1.0938	1.2971	1.0875	NaN	NaN	1.2617	NaN	NaN	1.0410	1.0285	1.0403	0.9344	0.8820	0.9886	0.8737	0.9496	1.5044	1.0470	1.0603	1.0621	1.0771	0.9248	1.0142	0.7847	0.5175	0.7994	NaN	NaN	NaN	0.8474	0.7337	0.7066	1.0325	1.0961	1.0659	1.1069	0.8197	0.9239	NaN	0.8950	NaN	NaN	NaN	NaN	NaN	0.9367	NaN	1.3498	NaN
1475	0.8391	1.1489	1.0547	NaN	NaN	1.2800	NaN	NaN	0.9887	0.9077	0.9797	0.8761	0.8724	0.8618	0.9120	1.0645	1.2797	0.9837	0.9828	1.0502	0.9811	0.8691	0.9052	0.8490	0.7496	0.7911	NaN	NaN	NaN	1.1305	0.7875	1.2669	0.4987	0.6562	1.1754	0.6798	1.0264	1.1460	NaN	0.5281	NaN	NaN	NaN	NaN	NaN	0.8395	NaN	0.9694	NaN
1476	0.6367	0.5985	0.8638	NaN	NaN	0.9232	NaN	NaN	1.1291	1.1283	0.9529	1.0722	1.1501	1.1572	0.9528	0.9829	0.7929	1.1152	0.9586	0.8303	0.8469	0.9714	1.2983	1.0339	0.7956	0.9069	NaN	NaN	NaN	0.9906	1.0131	0.5715	0.8622	0.8943	0.7901	0.7754	1.0146	1.1258	NaN	0.6782	NaN	NaN	NaN	NaN	NaN	0.8483	NaN	0.8014	NaN
1477	0.9823	0.7489	1.0794	NaN	NaN	1.3155	NaN	NaN	1.2486	1.2508	1.1297	1.1634	1.3448	1.2316	1.0403	0.9310	0.7771	1.0568	0.9881	1.0670	1.2304	1.1206	1.1730	0.8726	1.1018	0.9884	NaN	NaN	NaN	1.1501	1.1554	0.9822	0.9398	0.9143	1.0747	0.9731	0.8632	1.0018	NaN	0.8795	NaN	NaN	NaN	NaN	NaN	0.7175	NaN	0.9732	NaN
1478	0.8269	0.9407	1.0207	NaN	NaN	1.6933	NaN	NaN	1.1338	1.0787	1.0372	1.1047	1.1574	1.1260	0.9833	1.2284	1.0332	1.1831	0.9865	1.0307	0.7309	1.0747	1.1254	1.0858	1.0975	1.1196	NaN	NaN	NaN	1.0049	1.2143	1.2292	1.1235	0.9325	0.7885	1.3644	0.9629	1.1167	NaN	0.8820	1.1158	NaN	NaN	NaN	NaN	0.7527	NaN	0.8737	NaN
1479	0.6004	0.6849	0.8380	NaN	NaN	0.7000	NaN	NaN	0.7500	0.6918	0.7237	0.7529	0.7102	0.7217	0.7682	0.6872	1.0149	0.7788	1.0211	0.8895	1.0018	1.0101	0.8183	0.8087	0.7241	0.9237	NaN	NaN	NaN	1.0002	0.8189	0.9204	0.8258	0.8549	1.0527	0.7120	0.9561	0.8025	NaN	0.8890	0.7834	NaN	NaN	NaN	NaN	0.8205	NaN	0.9065	NaN
1480	0.5057	0.6677	1.1001	NaN	NaN	0.6996	NaN	NaN	0.7777	0.8038	1.1260	0.8354	0.8147	0.7981	1.2096	1.0532	0.5482	1.0288	0.8242	1.1084	0.7568	1.0937	0.8785	1.1370	1.1108	1.1519	NaN	NaN	NaN	1.0973	1.0138	1.0100	0.7087	0.8399	1.1784	1.1142	0.9878	1.3108	NaN	0.6578	0.9870	NaN	NaN	NaN	NaN	1.4128	NaN	0.8063	NaN
1481	0.8834	1.0749	1.0180	NaN	NaN	1.0658	NaN	NaN	1.1741	1.1202	1.0412	1.0905	1.0412	1.1221	1.0951	1.2325	0.8597	1.2976	1.0576	1.0458	0.9683	0.9799	1.1171	0.9655	0.9801	1.1931	NaN	NaN	NaN	1.2249	0.9906	1.0150	1.0512	0.9706	1.2403	0.8487	0.9549	0.9689	NaN	0.9899	1.3210	NaN	NaN	NaN	NaN	0.5933	NaN	0.9443	NaN
1482	1.1262	1.2229	1.1489	NaN	NaN	0.6237	NaN	NaN	0.7687	0.8401	1.0673	0.9292	0.8259	0.9460	0.8774	1.1275	0.9344	1.0953	0.9985	1.1033	1.0243	1.2390	0.7731	1.0703	1.0049	0.9680	NaN	NaN	NaN	1.0412	0.8651	0.6699	0.8699	0.9575	0.9705	0.6987	0.7621	1.2356	NaN	0.8391	1.6252	NaN	NaN	NaN	NaN	0.9082	NaN	1.3182	NaN
1483	0.9565	0.9274	1.0385	NaN	NaN	1.0175	NaN	NaN	1.0464	1.0829	1.0835	1.0398	1.1119	1.0308	0.9584	1.0211	1.0939	0.9001	1.0127	1.0071	1.1012	0.9329	1.0654	0.9309	0.9239	0.9744	NaN	NaN	NaN	1.0462	0.8574	0.8732	1.0598	1.1128	1.0838	0.9471	0.9521	1.2460	NaN	0.7525	1.1890	NaN	NaN	NaN	NaN	0.8855	NaN	0.9259	NaN
1484	1.3766	1.0050	1.0012	NaN	NaN	1.1862	NaN	NaN	1.1616	1.2565	1.0218	1.1501	1.2056	1.2869	1.4269	1.1068	1.1464	1.0955	1.0123	0.8695	1.1814	1.1943	1.1511	1.6589	1.4956	1.5522	NaN	NaN	NaN	1.1385	1.3136	1.0747	1.3962	1.1617	0.8983	1.3899	0.9929	0.8780	NaN	1.1687	1.3449	NaN	NaN	NaN	NaN	1.1405	NaN	0.8151	NaN
1485	1.0924	1.1435	0.7085	NaN	NaN	1.0000	NaN	NaN	1.2765	1.2679	0.8394	1.1604	1.1885	1.2660	1.0202	1.0125	1.2399	0.9107	0.9878	0.8711	1.0400	0.9740	1.3917	0.9295	0.9537	1.0566	NaN	NaN	NaN	1.1960	1.2100	1.0975	0.9524	0.9749	1.1846	0.5612	1.1080	1.1613	NaN	1.1077	0.8138	NaN	NaN	NaN	NaN	1.0830	NaN	0.7281	NaN
1486	1.2171	1.2258	1.0153	NaN	NaN	0.9782	NaN	NaN	0.9494	0.9996	0.9415	0.8806	0.8144	1.0060	0.9201	1.1243	1.0849	1.0414	1.1507	1.0394	0.9155	0.9815	1.0252	1.0188	1.2411	1.0741	NaN	NaN	NaN	1.1398	1.0181	1.1552	1.3294	0.9810	1.0885	1.2311	1.0183	0.9833	NaN	0.7792	0.7712	NaN	NaN	NaN	NaN	0.7435	NaN	0.9299	NaN
1487	1.2725	0.8641	0.9735	NaN	NaN	1.1068	NaN	NaN	0.9957	0.9707	0.9631	0.9239	1.0182	0.9398	0.8846	1.0049	0.7726	1.0165	1.0238	0.9252	0.9908	1.1608	0.9743	0.8667	0.8908	0.8042	NaN	NaN	NaN	1.0664	0.7256	1.0447	1.1241	1.0415	0.9244	1.0044	0.8781	1.1461	NaN	0.9067	0.8903	NaN	NaN	NaN	NaN	1.1899	NaN	0.8756	NaN
1488	1.3706	1.2625	1.0530	NaN	NaN	1.0530	NaN	NaN	1.0033	0.8906	1.1239	0.8770	0.8224	0.8456	0.8057	0.9180	1.3095	1.0194	1.1259	1.0139	0.9794	0.9149	0.9372	0.8315	0.7710	0.8284	NaN	NaN	NaN	0.9315	0.9809	0.8899	1.2510	1.1102	0.9242	0.8180	0.8477	1.3599	NaN	1.0590	0.7361	NaN	NaN	NaN	NaN	1.1648	NaN	0.7549	NaN
1489	1.1943	1.7440	1.1072	NaN	NaN	1.0560	NaN	NaN	1.2161	1.0758	1.0762	1.0395	1.1319	1.1284	1.1163	1.0615	1.4575	1.0688	1.0807	1.0668	0.9950	0.8998	1.0618	1.0028	0.9934	1.0994	NaN	NaN	NaN	1.3562	0.9796	0.8994	0.7679	0.9226	1.0363	0.7944	1.0995	1.1207	NaN	1.1109	0.8653	NaN	NaN	NaN	NaN	0.8295	NaN	0.8486	NaN
1490	0.9575	0.9405	0.9426	NaN	NaN	0.9735	NaN	NaN	0.9342	0.9478	0.9865	0.9870	0.9624	1.0174	0.9706	0.9668	0.9655	0.8425	0.9486	0.8605	1.0577	1.1341	1.3410	0.8740	0.9130	0.9326	NaN	NaN	NaN	1.0499	1.1331	1.0398	1.3698	1.1438	0.9918	1.0460	1.0196	0.7238	NaN	1.3495	0.7577	NaN	NaN	NaN	NaN	0.9603	NaN	1.1011	NaN
1491	1.2852	1.6764	0.9830	NaN	NaN	1.1030	NaN	NaN	0.9501	0.9763	1.0637	0.9940	0.9435	0.9556	1.2178	1.2134	0.9144	0.8482	1.0550	1.0030	1.0783	1.1775	0.8969	1.1988	1.2548	1.1802	NaN	NaN	NaN	1.1057	1.0420	1.0508	1.0016	0.9006	1.1994	1.1347	0.9693	1.1174	NaN	1.0222	0.7804	NaN	NaN	NaN	NaN	1.2912	NaN	1.3200	NaN
1492	0.8047	0.6964	0.9341	NaN	NaN	1.2641	NaN	NaN	1.0081	1.0319	0.9363	0.9395	0.9204	0.9763	1.1704	1.0010	0.5715	0.7143	0.8197	0.9417	0.5421	0.5673	0.8995	0.9749	0.9781	0.9607	NaN	NaN	NaN	0.8672	0.7469	1.1196	0.8876	0.9851	1.1446	0.9027	0.9963	1.1883	NaN	1.0004	0.7892	NaN	NaN	NaN	NaN	0.6705	NaN	0.6811	NaN
1493	1.2761	1.2900	1.0304	NaN	NaN	0.7907	NaN	NaN	1.1087	1.1645	1.0131	1.0854	1.2072	1.1105	1.0756	0.8944	1.5912	0.8800	1.0321	1.0285	1.3256	1.1429	1.0538	0.9230	1.0975	1.0069	NaN	NaN	NaN	0.9324	1.3421	0.9703	1.2600	1.1110	0.7316	1.4071	0.8483	0.8505	NaN	1.0390	1.0172	NaN	NaN	NaN	NaN	1.0480	NaN	1.1435	NaN
1494	0.8701	1.1361	1.0337	NaN	NaN	1.2126	NaN	NaN	1.1802	1.2074	1.1116	0.9627	1.0461	1.0492	1.0306	0.9719	1.0446	1.1302	1.0368	1.1583	0.8644	0.9362	1.2865	1.0500	1.0994	0.8740	NaN	NaN	NaN	1.0090	0.9339	0.9904	0.8090	0.7422	1.0860	1.0024	0.9602	0.8065	NaN	0.8893	1.2034	NaN	NaN	NaN	NaN	1.1881	NaN	1.1095	NaN
1495	0.9781	1.0532	0.9743	NaN	NaN	0.6543	1.0244	NaN	1.0777	1.0309	1.1158	0.9884	1.0608	0.9742	0.8583	0.9196	0.9890	1.1120	0.9504	0.9643	0.9459	0.8717	0.9871	0.7240	0.6444	0.7789	NaN	NaN	NaN	0.8930	0.7035	0.7722	1.2082	1.0968	0.9181	1.0992	0.8988	0.6590	NaN	1.1070	1.1592	NaN	NaN	NaN	NaN	1.1295	NaN	1.1300	NaN
1496	0.9662	1.0314	0.9397	NaN	NaN	0.8863	0.8933	NaN	0.8864	0.8033	1.0481	0.8523	0.8745	0.8258	1.0771	1.0112	0.8177	0.9016	0.8400	0.9664	0.8413	0.8365	0.6929	1.1580	1.3643	1.1950	NaN	NaN	NaN	1.0360	1.3462	1.5001	1.2038	1.1982	1.1969	1.3805	1.0967	1.1869	NaN	1.2700	0.8697	NaN	NaN	NaN	NaN	0.7653	NaN	0.7494	NaN
1497	0.6218	0.5550	0.9474	NaN	NaN	0.6314	0.9269	NaN	0.7386	0.7188	0.8521	0.8851	0.7380	0.9194	0.8670	0.5760	0.5540	0.6005	0.8380	0.8960	0.6447	0.7649	0.9072	0.8406	0.7723	0.8187	NaN	NaN	NaN	0.8174	0.8567	1.0664	0.8176	0.9859	0.6379	0.8137	1.0158	1.0181	NaN	1.0057	0.7204	NaN	NaN	NaN	NaN	0.6995	NaN	0.9080	NaN
1498	0.9767	1.0257	1.0696	NaN	NaN	1.0439	0.9649	NaN	0.8085	0.8618	1.0394	0.9090	0.8437	0.9393	1.0725	0.8479	1.1983	1.2885	0.9911	1.0734	1.0282	1.0875	0.9232	1.1886	1.1684	0.9309	NaN	NaN	NaN	1.0418	0.8859	0.7822	1.0978	0.9701	1.0157	1.0446	0.9892	0.8423	NaN	1.0714	0.8192	NaN	NaN	NaN	NaN	1.3604	NaN	1.3045	NaN
1499	0.4300	0.6343	0.6990	NaN	NaN	0.7064	0.7980	NaN	1.0286	1.0224	0.6134	0.9950	1.1510	1.0211	1.0363	0.6916	0.8298	0.9968	0.9546	0.7393	0.9831	1.0589	1.0863	1.1349	1.2325	1.2101	NaN	NaN	NaN	0.6389	1.0855	1.1929	0.6613	0.7419	0.7233	0.8609	1.0854	0.7638	NaN	0.8498	0.6045	NaN	NaN	NaN	NaN	0.7724	NaN	0.5195	NaN
1500	1.0821	0.9849	0.8851	NaN	NaN	0.5215	0.6557	NaN	0.8796	0.8736	0.8890	0.8075	0.7843	0.8763	0.5878	0.8265	0.7752	1.0731	1.0019	0.8109	0.8253	0.9325	0.9045	0.7158	0.6028	0.7486	NaN	NaN	NaN	0.8439	0.6903	0.5832	0.9016	1.2196	0.9764	0.3549	0.9376	0.7361	NaN	0.6642	0.8373	NaN	NaN	NaN	NaN	0.8169	NaN	0.9796	NaN
1501	1.3766	1.2485	1.1880	NaN	NaN	0.8765	1.2431	NaN	1.0533	1.1006	1.1430	1.0086	1.1329	1.0510	1.0936	0.9199	1.0463	0.9673	0.8909	1.2095	0.9499	1.0052	1.0540	1.0282	1.0171	0.9827	NaN	NaN	NaN	1.1230	1.1605	1.0074	0.8890	0.7705	0.9729	1.5684	1.0380	1.0091	NaN	1.2422	1.0092	NaN	NaN	NaN	NaN	1.1095	NaN	1.4568	NaN
1502	1.1095	1.0610	1.1314	NaN	NaN	1.1135	1.2261	NaN	1.2493	1.1196	1.1444	1.0798	1.2638	1.1205	0.8660	1.0586	0.9856	0.9825	0.9872	1.1010	1.0761	0.9884	0.9571	1.1013	0.9345	0.8304	NaN	NaN	NaN	1.2418	0.7615	1.1053	0.8132	0.7733	1.0468	1.1057	0.9104	1.0306	NaN	0.7316	1.2071	NaN	NaN	NaN	NaN	1.1019	NaN	1.2444	NaN
1503	1.2620	1.2995	0.9850	NaN	NaN	0.9129	0.9933	NaN	1.3289	1.3407	0.9760	1.2513	1.3698	1.2830	1.0141	1.1641	0.9156	1.0057	1.1445	1.0449	1.1301	0.9669	1.3472	1.0154	1.1817	1.0850	NaN	NaN	NaN	1.2677	1.3085	1.4152	1.4632	1.1725	1.2394	1.5153	1.1059	1.3274	NaN	1.2345	1.2451	NaN	NaN	NaN	NaN	0.9855	NaN	0.7473	NaN
1504	0.7894	0.7414	1.0824	NaN	NaN	1.7027	1.0775	NaN	0.9975	1.0088	1.0451	0.9795	0.8858	1.0203	1.0963	1.0996	0.8960	1.0595	0.9966	1.0784	0.9572	0.9792	1.0430	0.9289	1.0506	1.0918	NaN	NaN	NaN	1.0832	1.0955	1.1680	1.1073	1.2205	1.0552	1.1950	0.9791	1.0379	NaN	1.1714	0.9071	NaN	NaN	NaN	NaN	1.1929	NaN	0.7998	NaN
1505	0.6277	0.7429	1.0649	NaN	NaN	0.8396	0.8647	NaN	0.5868	0.5949	1.0359	0.7294	0.5915	0.6569	1.0921	0.9691	0.5217	0.9992	0.7793	1.0396	0.8059	0.9800	0.6438	1.0793	1.1219	1.0294	NaN	NaN	NaN	0.7759	0.9212	0.8735	0.7093	0.7934	0.7009	0.4303	0.8459	0.9999	NaN	0.6442	0.7843	NaN	NaN	NaN	NaN	0.7684	NaN	0.8331	NaN
1506	0.7542	1.0013	1.0434	NaN	NaN	0.9739	0.9899	NaN	0.6794	0.7115	1.0949	0.7769	0.8535	0.7656	0.7622	1.0210	1.2592	0.9042	1.0980	1.0298	1.1493	1.3225	0.8861	0.7592	0.7245	0.8921	NaN	NaN	NaN	0.9089	1.0405	0.9867	1.1683	1.2078	0.9939	1.1437	0.9675	1.2989	NaN	1.3873	1.3044	NaN	NaN	NaN	NaN	0.7192	NaN	1.1751	NaN
1507	0.6663	0.7609	0.9757	NaN	NaN	0.8619	0.9113	NaN	0.9818	1.0451	1.0548	0.9973	1.0581	1.0035	0.8139	1.0136	1.2763	1.0212	1.0347	0.9611	1.1091	1.1800	1.0820	0.9191	0.9620	0.9228	NaN	NaN	NaN	0.9809	0.9134	1.1165	0.9617	0.8581	0.9659	1.1745	0.8859	0.9756	NaN	1.1743	1.5146	NaN	NaN	NaN	NaN	0.9708	NaN	0.9235	NaN
1508	1.2615	1.1130	1.0208	NaN	NaN	1.0566	0.9861	NaN	1.1130	1.0843	1.0674	0.9696	1.0526	1.0173	0.8256	0.9190	1.4038	1.1119	0.9726	1.0435	0.9874	1.3595	0.9648	0.8667	0.8319	0.9488	0.8926	NaN	NaN	1.0601	0.9225	1.2235	0.8972	0.9353	1.0432	1.0779	1.0177	0.9685	NaN	0.5356	0.8343	NaN	NaN	NaN	NaN	1.0467	NaN	1.3729	NaN
1509	1.2728	1.3329	1.0553	NaN	NaN	1.2285	1.3532	NaN	1.1559	1.1645	1.1000	1.0284	1.0240	1.0547	1.2353	1.3269	1.7224	1.2200	1.2221	1.0052	1.1230	1.3148	1.0355	1.3838	1.5059	1.3205	1.2080	NaN	NaN	1.2080	1.2309	1.4546	0.8591	0.8588	1.0230	0.6006	1.1031	1.1360	NaN	0.8613	1.2941	NaN	NaN	NaN	NaN	1.3319	NaN	0.7536	NaN
1510	0.7635	0.8187	0.7216	NaN	NaN	0.6681	0.6927	NaN	1.2540	1.1663	0.7519	1.1369	1.2949	1.2000	1.0777	1.1701	0.4350	0.8285	0.7827	0.8123	0.6193	0.7541	1.3322	1.1371	0.8339	1.1192	1.7133	NaN	NaN	1.0546	1.1252	1.3148	0.8945	0.9495	1.0702	0.7908	1.1551	1.2795	NaN	0.9418	0.7461	NaN	NaN	NaN	NaN	0.4766	NaN	0.9500	NaN
1511	0.7390	1.1654	0.8847	NaN	NaN	1.0158	0.9882	NaN	0.7412	0.8437	0.8961	0.8631	0.7914	0.8940	0.8997	0.7670	1.4915	0.8878	1.2799	0.9467	0.9305	1.1333	0.8103	0.8192	0.5789	0.8626	0.6529	NaN	NaN	0.7499	1.3345	1.0090	1.3119	1.3073	1.1279	0.9528	0.9284	1.2873	NaN	1.1868	0.9751	NaN	NaN	NaN	NaN	1.1344	NaN	1.1890	NaN
1512	1.2755	1.1847	1.0382	NaN	NaN	0.9314	0.9009	NaN	1.0078	1.0607	1.1019	0.9903	0.9630	1.0734	0.9669	1.0711	1.0711	1.0311	1.1848	1.0615	1.0983	0.9116	0.8867	0.9480	0.9341	1.0052	0.8974	NaN	NaN	1.1056	0.7999	0.9623	1.3398	1.0218	1.2074	1.3266	1.0630	0.9354	NaN	1.1040	1.2022	NaN	NaN	NaN	NaN	0.9353	NaN	1.1239	NaN
1513	1.0899	0.9190	1.0986	NaN	NaN	1.1021	1.3243	NaN	1.1557	1.0730	1.0993	1.0836	0.9972	1.1050	1.1524	1.1586	0.8751	0.7376	1.1063	1.1023	1.1293	0.9157	1.0840	1.1078	1.2076	1.2496	1.0839	NaN	NaN	1.0948	0.6586	0.8871	0.8547	0.7576	1.2031	0.8430	0.9984	1.2707	NaN	0.6021	1.4684	NaN	NaN	NaN	NaN	0.8974	NaN	1.1732	NaN
1514	1.0831	0.9497	1.0491	NaN	NaN	0.7501	1.5493	NaN	1.2719	1.1428	1.0103	1.0853	1.2429	1.1015	0.9367	0.9283	1.1638	1.1712	1.1259	1.0177	1.0416	1.1227	1.0901	0.8932	0.6720	0.8565	1.0442	NaN	NaN	1.0400	0.9154	0.8561	1.2068	0.9320	1.0817	0.8137	0.9267	0.8676	NaN	0.9560	1.2172	NaN	NaN	NaN	NaN	1.1472	NaN	0.6074	NaN
1515	0.9437	0.6535	0.9533	NaN	NaN	0.7775	0.8105	NaN	0.9197	0.9227	0.8185	0.9513	1.0430	0.9987	0.8622	0.8165	0.7788	1.0613	0.9470	0.9440	1.0686	0.7111	0.9917	0.8320	0.7301	0.9122	1.2874	NaN	NaN	0.9559	0.8845	0.9031	0.6700	0.7858	0.7427	0.8304	0.9702	0.7690	NaN	0.6509	0.8187	NaN	NaN	NaN	NaN	0.8194	NaN	0.6589	NaN
1516	0.7613	0.6906	0.8889	NaN	NaN	1.0418	0.9732	NaN	0.9944	1.0272	0.9334	0.9913	1.0764	1.0190	1.0375	0.9819	0.8775	1.2125	0.9529	0.8736	1.1842	0.9903	1.1963	1.2274	1.1357	1.3064	0.7705	NaN	NaN	0.5918	0.9973	0.8110	0.8511	1.0361	0.6107	0.7104	1.0772	0.5538	NaN	0.9875	0.8556	NaN	NaN	NaN	NaN	0.7409	NaN	0.9924	NaN
1517	1.0640	1.1347	1.0570	NaN	NaN	0.8304	1.0704	NaN	1.3138	1.1916	1.1149	1.1426	1.3315	1.1479	1.1633	1.0246	0.8876	1.0319	0.9845	1.1120	0.9663	0.9158	1.1209	1.1997	1.2190	1.2126	0.8744	NaN	NaN	1.1179	1.0200	0.8986	0.7038	0.7282	1.0002	1.0874	1.1952	1.1824	NaN	0.6273	1.3165	NaN	NaN	NaN	NaN	0.8430	NaN	1.0611	NaN
1518	0.4643	0.5746	0.9235	NaN	NaN	0.6500	0.6022	NaN	0.8211	0.8823	0.7961	0.7948	0.6888	0.8275	0.7860	0.5666	0.7969	0.8997	1.0465	0.9818	0.9413	1.1278	0.8007	0.7284	0.8076	0.7288	0.7406	NaN	NaN	0.7534	0.8712	0.9424	0.7102	0.8739	0.8570	0.5617	0.8030	0.6384	NaN	0.7852	0.7531	NaN	NaN	NaN	NaN	0.8123	NaN	0.8108	NaN
1519	0.6753	0.6689	1.0341	NaN	NaN	1.2665	1.0871	NaN	1.1738	1.0161	1.0923	1.0572	1.1216	1.0522	0.8452	1.0670	0.9833	1.0475	1.1406	1.0858	0.9134	1.1080	1.1187	1.0034	0.8324	0.8215	1.0589	NaN	NaN	1.1696	1.2097	1.2147	1.5226	0.9898	1.1659	1.3600	0.9282	1.0490	NaN	0.9038	0.6615	NaN	NaN	NaN	NaN	1.0334	NaN	0.7480	NaN
1520	0.8389	0.9074	1.0085	NaN	NaN	0.9067	0.9531	NaN	0.9893	1.0930	1.0122	1.0504	1.1039	1.0544	1.0457	1.1483	0.6723	0.6675	0.8541	1.0715	0.9807	1.3854	1.0882	1.1463	1.0582	1.1204	1.0573	NaN	NaN	1.1323	1.2472	1.2739	0.7202	0.9262	1.0727	0.4154	1.0002	1.1101	NaN	0.9960	1.0657	NaN	NaN	NaN	NaN	1.1170	NaN	0.8818	NaN
1521	0.5511	0.6652	1.0373	NaN	NaN	1.0580	0.8944	NaN	0.7542	0.8114	1.0659	0.7504	0.7071	0.7831	1.0345	0.9474	0.6993	0.8081	0.8435	0.9559	0.5553	0.4797	0.7228	0.9735	1.2009	1.1027	1.0717	NaN	NaN	1.1382	0.9650	0.9715	1.1259	0.8478	0.9370	1.3651	1.1460	1.2618	NaN	0.9180	0.8500	NaN	0.9798	NaN	NaN	0.4961	NaN	0.9807	NaN
1522	1.1469	1.0868	1.0053	NaN	NaN	0.8961	0.8794	NaN	1.0030	0.9545	0.9503	0.9903	0.9016	1.0106	1.1025	1.0959	0.9383	1.0028	0.8679	1.0678	1.0449	0.8813	0.9523	1.0437	0.8002	0.9968	0.9263	NaN	NaN	0.9256	0.7440	0.8388	1.2767	1.1240	1.2009	1.0449	1.0607	1.0760	NaN	1.0831	1.3342	NaN	1.2974	NaN	NaN	0.9751	NaN	0.7077	NaN
1523	0.9786	0.8829	1.0391	NaN	NaN	1.3761	1.2979	NaN	0.7754	0.7849	1.0948	0.7746	0.6717	0.8522	0.9715	0.9264	0.9344	0.9860	1.0381	0.9992	0.9420	1.0302	0.9160	0.7904	0.7114	0.8204	0.8391	NaN	NaN	1.0614	0.8503	1.1604	1.5168	1.0002	1.2098	1.0924	0.9366	0.6349	NaN	1.0499	1.0026	NaN	1.0881	NaN	NaN	1.4494	NaN	1.0142	NaN
1524	1.7028	1.7292	1.0599	NaN	NaN	1.4923	1.2941	NaN	1.3441	1.2743	1.1075	1.2077	1.2984	1.2278	1.2339	1.1270	1.6033	1.1645	1.2591	1.0308	1.1906	1.0444	1.1775	1.1422	1.1851	1.1747	1.1439	NaN	NaN	1.1977	1.0705	1.3170	1.1703	0.9325	0.9511	1.1790	1.1477	1.1116	NaN	1.0285	1.0344	NaN	1.1451	NaN	NaN	1.6678	NaN	0.9188	NaN
1525	1.2091	1.3263	0.9548	NaN	NaN	1.3319	0.9402	NaN	1.1681	1.1173	0.9618	1.0629	0.9864	1.1390	1.1573	1.3392	0.9773	0.9716	0.9816	0.9570	0.9824	1.3841	1.1533	1.1420	1.2821	1.3316	1.1013	NaN	NaN	1.1193	1.3406	1.3274	1.0402	1.0426	1.1616	1.3302	1.0818	1.3013	NaN	1.1379	1.0474	NaN	1.0149	NaN	NaN	1.1275	NaN	0.8082	NaN
1526	1.0005	1.2305	0.8482	NaN	NaN	1.0007	1.1154	NaN	1.1513	1.0632	0.9863	1.0287	1.1593	1.0004	0.9996	0.9842	1.3603	1.1719	1.1243	0.9474	1.2051	1.0798	0.9602	0.8905	0.8555	0.8581	0.9991	NaN	NaN	0.9433	1.0667	0.8907	1.0875	1.0600	1.0098	1.2068	0.7724	0.9340	NaN	1.1214	1.3485	NaN	1.2165	NaN	NaN	1.0514	NaN	1.1686	NaN
1527	0.8062	0.9507	1.0641	NaN	NaN	1.5884	1.0560	NaN	1.3544	1.2019	0.9478	1.0975	1.2012	1.1310	0.9689	1.0907	0.7250	1.1588	1.0457	1.0584	0.8183	1.0334	1.1280	0.9927	1.0852	1.1177	0.8597	NaN	NaN	1.0662	0.6722	0.9262	0.9136	0.9249	0.9607	0.8663	0.9969	0.7093	NaN	1.0264	0.7813	NaN	0.8856	NaN	NaN	0.5911	NaN	0.8421	NaN
1528	0.8568	0.8984	1.0392	NaN	NaN	0.8842	1.1555	NaN	0.9381	0.8818	1.0680	0.9643	0.8591	0.9332	1.1168	1.0931	0.5970	1.0152	0.8478	1.0219	0.9288	0.8206	0.9820	1.1231	1.1071	0.9338	1.2188	NaN	NaN	1.0629	0.9630	1.2245	0.9809	0.8113	1.2469	1.1929	1.1377	1.1785	NaN	0.9341	0.8096	NaN	0.7627	NaN	NaN	0.8900	NaN	0.8956	NaN
1529	0.4317	0.5010	0.7781	NaN	NaN	0.4537	0.6149	NaN	0.8235	0.7848	0.6787	0.8564	0.7719	0.9034	0.9463	0.4715	0.6651	0.8844	0.8566	0.6915	0.6288	0.7590	0.9388	1.0189	1.0241	1.0026	0.9327	NaN	NaN	0.7945	0.7993	0.8834	0.4647	0.7768	1.0345	0.3845	1.1890	1.0184	NaN	0.6315	0.6349	NaN	0.8388	NaN	NaN	0.5251	NaN	0.5159	NaN
1530	1.6091	1.2313	1.1145	NaN	NaN	1.0361	1.3242	NaN	0.9253	0.8766	1.1425	0.9324	0.9679	0.9308	1.1426	1.0768	1.2212	0.9559	0.9831	1.0581	1.1796	1.0452	0.9869	0.9264	0.9752	1.0068	0.8633	NaN	NaN	0.9422	1.2835	1.0661	1.2596	1.1387	0.9524	1.0994	0.8935	0.9421	NaN	1.4919	1.1311	NaN	1.2385	NaN	NaN	1.3996	NaN	1.3380	NaN
1531	0.8277	0.6912	1.1089	NaN	NaN	1.2373	1.0640	NaN	1.0291	1.0494	1.1423	0.8897	0.8109	0.9426	0.9626	1.0884	0.9042	1.0120	0.9305	1.1169	1.0602	1.1752	0.9760	0.9130	0.9120	0.8710	1.1056	NaN	NaN	1.0019	1.0337	1.0960	0.8430	0.9857	1.0287	1.0740	1.0084	0.9237	NaN	1.0800	1.3695	NaN	0.9949	NaN	NaN	1.2054	NaN	0.8436	NaN
1532	0.4591	0.6835	0.7672	NaN	NaN	0.5198	0.6115	NaN	1.0162	0.9660	0.7006	0.9853	1.0030	0.9657	0.9158	0.6571	0.5815	1.0962	0.8216	0.7335	0.7529	0.7852	0.9637	0.8327	0.7048	0.7805	1.0661	NaN	NaN	0.7441	0.8560	0.7384	0.4971	0.7235	0.5537	0.5130	0.8823	0.6683	NaN	0.4754	0.3483	NaN	0.6166	NaN	NaN	0.5137	NaN	0.6520	NaN
1533	0.9673	1.1208	0.9603	NaN	NaN	0.9890	1.1044	NaN	0.7848	0.7751	1.0701	0.8311	0.7650	0.7916	0.7670	0.9688	0.8430	0.9578	0.9094	0.9685	1.0798	1.0645	0.8591	0.8242	0.9293	0.9868	0.6813	NaN	NaN	0.9394	0.8361	0.8610	0.9806	0.9748	0.9971	1.3093	0.8925	0.8535	NaN	1.0780	1.3509	NaN	1.2196	1.0145	NaN	1.2250	NaN	0.8947	NaN
1534	1.3664	1.3061	1.2089	NaN	NaN	0.8493	1.3091	NaN	1.2039	1.2022	1.2496	1.1422	1.0039	1.0850	1.2042	1.2978	1.0809	1.0657	1.1664	1.1797	1.2198	1.0792	1.0565	1.3380	1.5591	1.3134	1.2753	NaN	NaN	1.0753	1.0361	1.2994	0.9933	1.0604	1.1623	1.3109	1.0966	1.0367	NaN	0.9370	1.7019	NaN	1.2911	1.2517	NaN	1.5878	NaN	1.0618	NaN
1535	1.2605	1.4027	1.0695	NaN	NaN	1.2354	1.3742	NaN	1.3752	1.2777	1.0426	1.2180	1.3016	1.2367	1.0936	1.1036	1.1371	1.1237	1.0866	0.9959	1.1816	1.2406	1.3564	0.8736	0.8207	0.9332	1.2415	NaN	NaN	1.1161	1.0122	0.8589	1.0179	1.1260	1.2310	1.0921	1.1180	1.1238	NaN	1.1542	1.1757	NaN	1.2423	1.1702	NaN	1.1798	NaN	1.2916	NaN
1536	1.1717	1.0666	1.0212	NaN	NaN	1.0862	1.1003	NaN	0.8874	0.8714	0.9306	0.9465	0.8241	0.9862	0.9098	1.1783	1.5840	1.0579	1.0761	1.0058	1.4950	0.9453	1.0133	1.0043	0.9251	0.9603	1.0372	NaN	NaN	1.2639	1.1419	1.1943	1.1562	1.3250	1.1636	1.1476	1.1183	1.0797	NaN	1.2387	1.0607	NaN	1.1669	0.8703	NaN	1.2046	NaN	1.1833	NaN
1537	0.9713	0.9792	0.9062	NaN	NaN	0.8374	0.8988	NaN	0.9092	0.8855	0.9671	0.9179	0.8854	0.9298	0.8449	0.9965	1.1405	1.0290	0.9494	0.9105	1.0663	0.7855	1.0557	0.8761	0.7811	1.0161	0.8980	NaN	NaN	0.9850	1.2155	1.0808	0.7599	0.6264	1.0134	1.1809	0.8741	1.0652	NaN	0.5798	0.9859	NaN	0.7772	1.0148	NaN	0.8319	NaN	1.2072	NaN
1538	1.1214	1.4391	1.0688	NaN	NaN	1.1626	1.0737	NaN	0.6606	0.7002	1.1280	0.7438	0.7854	0.7409	0.9438	0.9229	1.0038	0.9698	1.1354	1.0330	1.0355	1.1793	0.7948	1.0159	1.1743	1.0437	1.0369	NaN	NaN	1.0733	1.1886	1.0347	1.2145	1.3182	1.0840	1.2173	0.9727	1.0664	NaN	1.3643	0.8713	NaN	0.8054	1.1263	NaN	1.1072	NaN	0.9501	NaN
1539	1.1178	1.1601	1.0870	NaN	NaN	0.8438	0.9057	NaN	1.3899	1.2940	1.1748	1.2705	1.1813	1.3289	1.2204	1.3406	1.0606	1.2727	0.9097	1.0247	1.0026	1.3499	1.4606	1.3341	1.5446	1.3167	1.1493	NaN	NaN	1.2055	1.4728	1.4094	1.2701	1.3013	1.4409	1.4757	1.2904	1.3455	NaN	1.3581	1.0199	NaN	0.9336	1.1326	NaN	1.0614	NaN	0.6532	NaN
1540	0.7266	0.7646	0.9673	NaN	NaN	0.7674	0.9663	NaN	0.8964	0.8368	0.9023	0.8827	0.9629	0.8522	0.9575	0.7606	0.9850	0.9036	0.9777	0.9995	0.9737	1.2802	0.8973	0.8062	0.7510	0.7726	0.8910	NaN	NaN	0.6344	0.8336	0.8876	0.5117	1.0182	1.0717	0.4018	0.9517	0.9762	NaN	0.8029	1.0010	NaN	0.9322	0.9553	NaN	1.2650	NaN	0.9536	NaN
1541	0.5881	0.6616	0.9327	NaN	NaN	0.7707	0.6139	NaN	0.7616	0.8246	0.8469	0.7812	0.7045	0.8284	0.8143	0.7597	0.6531	0.8601	0.8951	0.9932	0.7238	0.7812	0.7197	0.9200	0.8350	0.9394	0.7634	NaN	NaN	0.6309	0.6396	0.9592	0.7032	0.9217	1.2640	0.6147	0.8829	0.6631	NaN	0.4174	0.4088	NaN	0.7334	0.6788	NaN	0.8169	NaN	0.8003	NaN
1542	0.7250	0.8781	0.9672	NaN	NaN	0.5339	0.7830	NaN	0.9637	1.0074	1.0261	0.9982	0.9528	0.9540	0.9848	0.9855	0.6421	0.7740	0.9090	0.9677	0.8113	1.0776	0.9320	1.0724	1.0284	1.1593	1.2910	NaN	NaN	1.1524	1.0435	1.0121	1.2185	1.1895	1.0081	1.3126	0.9909	0.9013	NaN	1.3340	1.0173	NaN	1.0215	1.0143	NaN	0.8666	NaN	0.9882	NaN
1543	0.7595	0.9415	1.0309	NaN	NaN	1.1683	0.8833	NaN	0.8778	0.8629	1.0680	0.9256	0.8597	0.9384	1.0281	0.9352	0.8819	1.0893	1.0050	1.0544	1.1919	1.1203	0.9660	0.9714	0.8598	1.0298	0.9229	NaN	NaN	1.0761	1.1572	0.9116	1.0097	1.1334	0.9052	1.2854	0.9778	1.3348	NaN	1.2869	1.0741	NaN	0.8455	1.2671	NaN	1.3810	NaN	1.0706	NaN
1544	0.9345	1.0032	1.0677	NaN	NaN	1.2648	0.8997	NaN	0.9991	0.9875	1.1120	0.9730	0.9711	0.9991	0.9883	1.0142	0.8573	0.9940	1.1058	1.0203	0.9025	0.5476	0.9768	1.1429	1.0816	1.0908	1.0158	NaN	NaN	0.9547	0.9648	1.1431	1.2907	1.2195	1.1703	1.0741	0.9887	1.0103	NaN	1.1453	0.9500	NaN	0.7116	1.1686	NaN	0.7918	NaN	0.8413	NaN
1545	0.9270	1.0165	0.9901	NaN	NaN	0.8009	0.8952	NaN	1.0733	0.9917	0.9444	1.0385	1.0519	1.0317	0.9411	0.8789	0.8152	0.8908	0.8836	1.0514	1.0726	1.2695	1.0894	1.1548	0.9350	1.0212	0.7611	NaN	NaN	0.8935	0.9964	0.9508	0.8125	0.9011	0.8200	1.1793	1.0743	0.8689	NaN	0.9439	1.1277	NaN	0.9250	1.3197	NaN	1.0461	NaN	0.9930	NaN
1546	1.2303	1.2497	1.0482	NaN	NaN	1.5454	0.9287	NaN	1.2043	1.0377	1.1184	1.0526	1.0299	1.0237	0.9923	0.9230	1.1901	1.2109	1.0867	1.1309	0.8991	0.8785	1.1050	0.8337	0.7795	0.7555	0.8712	NaN	NaN	0.9058	0.7069	0.8381	0.9516	0.7838	0.9672	0.8165	0.9112	0.8237	NaN	0.8959	1.1876	NaN	0.6379	0.9603	NaN	1.2649	NaN	1.1543	NaN
1547	0.9057	0.7399	1.0744	NaN	NaN	0.8132	1.1879	NaN	0.9362	0.9180	1.1198	0.9363	0.8022	0.9339	1.0844	1.0780	0.6432	0.9094	0.8700	1.0558	0.6161	0.8657	0.9587	0.9167	0.8719	0.9529	1.0716	NaN	NaN	1.0154	1.0521	1.2023	0.8719	1.0091	1.2951	0.9388	0.9618	0.9458	NaN	0.8425	0.9663	NaN	0.7681	1.1590	NaN	0.9094	NaN	1.1734	NaN
1548	0.6514	0.7222	0.5708	NaN	NaN	0.7445	0.7951	NaN	0.7755	0.8647	0.7912	0.8795	0.8643	0.8914	0.8460	0.5077	1.0087	0.8719	0.9015	0.6286	1.0432	0.8236	0.8959	0.8526	0.8287	0.8686	0.7500	NaN	NaN	0.9103	1.2131	0.9192	0.6557	0.8311	0.9542	1.0591	0.8765	0.8249	NaN	0.7597	0.5044	NaN	0.8118	0.8085	NaN	0.7872	NaN	0.6955	NaN
1549	1.2685	1.3177	1.0782	NaN	NaN	1.0447	1.1247	NaN	1.0400	1.1281	1.0879	1.1099	1.1716	1.0292	1.2284	1.1008	1.3772	1.1287	1.1140	1.0737	1.1912	1.2668	1.0654	0.9940	1.1491	1.0184	0.8657	NaN	NaN	1.1096	1.0680	1.0287	1.0068	1.1096	1.0290	1.2722	0.9828	1.0035	NaN	1.0670	1.2388	NaN	1.1425	1.1029	NaN	1.3437	NaN	1.4136	NaN
1550	1.0103	0.9339	1.0838	NaN	NaN	1.1038	1.1385	NaN	1.0082	0.9922	0.9701	1.0848	0.9576	1.0251	0.8202	1.1550	1.1496	1.1647	1.0657	1.0344	1.1886	0.8721	1.1392	0.9297	0.9875	0.9032	0.9737	NaN	NaN	0.9646	1.0872	0.8979	0.6443	0.7059	1.6938	0.6619	1.1497	1.0100	NaN	0.6885	1.1166	NaN	1.2324	1.1159	NaN	1.0836	NaN	1.0681	NaN
1551	1.1217	1.3547	1.1367	NaN	NaN	1.3051	0.9777	NaN	0.8615	0.9374	1.0525	0.9191	0.8896	0.9084	1.0673	1.1769	1.3781	1.1173	1.0434	1.0935	1.2151	1.1397	0.8902	1.0538	1.0533	0.9442	1.0745	NaN	NaN	1.2347	1.3240	1.1867	1.2431	1.1562	0.8325	1.3517	1.1244	1.1381	NaN	1.1365	1.0370	NaN	1.1708	0.9629	NaN	1.0966	NaN	1.5005	NaN
1552	0.9400	1.1347	1.0785	NaN	NaN	1.1720	1.2332	NaN	1.0206	1.0203	1.0422	1.0446	0.9332	1.0417	1.1748	1.2580	0.9479	0.9770	1.0310	1.0365	0.9434	0.8684	0.9694	1.0500	1.0284	1.0736	1.1652	NaN	NaN	0.9206	1.2262	0.9472	1.1159	1.0714	0.9488	1.2438	1.1751	1.2741	NaN	1.1793	1.3369	NaN	1.2534	1.0923	NaN	0.9914	NaN	1.2146	NaN
1553	1.3711	0.9463	1.0542	NaN	NaN	0.9039	1.1893	NaN	1.2228	1.2515	1.0548	1.2246	1.3616	1.2015	1.2030	1.1832	1.2523	0.9451	1.1737	1.0369	1.1331	1.0610	1.3644	1.1022	1.1140	1.1551	0.9892	NaN	NaN	0.8677	0.9946	0.9180	1.2433	1.0049	1.0485	1.2201	1.0064	1.1165	NaN	1.1366	0.7433	NaN	0.9825	1.2471	NaN	1.1441	NaN	1.1433	NaN
1554	0.8119	0.8780	0.9054	NaN	NaN	0.8935	1.1134	NaN	0.7862	0.7629	0.8609	0.8654	0.8539	0.8763	0.7595	0.7765	0.8543	0.9946	1.0343	0.9512	0.8684	0.8357	0.9111	0.7604	0.6431	0.8463	0.8991	NaN	NaN	0.8263	0.5701	0.7180	0.6184	0.7737	0.6349	0.5389	0.8158	0.7338	NaN	0.5953	0.8902	NaN	0.6996	0.9632	NaN	0.8360	NaN	0.8955	NaN
1555	0.8325	0.9072	0.9126	NaN	NaN	0.9979	1.0038	NaN	0.9082	0.9250	0.9804	1.0135	0.8697	0.9928	0.9731	0.8726	0.8540	0.9737	0.8543	0.8934	0.9502	1.0483	1.0949	0.9160	0.8554	0.8632	0.8872	NaN	NaN	1.0649	1.0029	1.0367	0.8519	0.9520	0.7684	0.9092	0.7087	0.9578	NaN	0.8343	0.9817	NaN	0.9792	1.1197	NaN	1.0413	NaN	0.9923	NaN
1556	0.9065	0.8611	1.0639	NaN	NaN	1.3788	1.2997	NaN	1.1161	1.0730	1.0693	1.1054	1.1107	1.1006	1.4072	1.1057	1.3139	1.2135	1.0306	0.9711	1.0161	1.0000	1.1838	1.3962	1.5669	1.3920	0.8828	NaN	NaN	0.9930	1.0289	0.9458	1.1011	1.0030	0.9205	1.1386	1.0361	1.2242	NaN	1.1428	1.0276	NaN	0.7782	1.0636	NaN	1.0517	NaN	1.6092	NaN
1557	1.2282	1.1838	0.9975	NaN	NaN	1.1303	1.1879	NaN	1.1413	1.0497	1.0411	1.1530	1.1949	1.1116	1.0195	0.9215	1.5210	1.1659	1.1394	1.0309	1.2622	1.1246	1.1483	1.0569	1.1478	1.0392	1.1174	NaN	NaN	1.2411	1.5151	1.2104	1.4901	1.1407	0.9863	1.4947	0.8557	1.1290	NaN	1.3066	1.1421	NaN	1.1618	1.0615	NaN	1.3570	NaN	1.1272	NaN
1558	1.0850	1.4224	0.9839	NaN	NaN	0.9835	0.9189	1.1186	0.9213	0.8835	1.0323	0.9210	0.8247	0.9498	0.8715	1.1666	0.8098	1.0213	1.0975	0.9255	0.9818	0.5683	0.8218	0.8831	0.9892	1.0716	1.1209	NaN	NaN	1.1743	0.8545	1.3677	1.1177	0.8764	0.9978	1.0200	1.2276	1.1608	NaN	1.1779	0.8811	NaN	1.0248	0.8953	NaN	0.9311	NaN	1.1293	NaN
1559	1.1115	1.0105	0.9822	NaN	NaN	0.9514	1.1368	1.1722	1.1325	1.0488	0.9807	1.1091	1.1567	1.0981	1.0859	1.0811	0.6851	0.6683	1.0471	0.9942	0.9162	1.4051	1.1566	1.0105	1.0479	0.9834	1.2681	NaN	1.0258	1.1075	1.0964	1.2310	1.2933	1.2563	1.2691	0.9878	1.0661	1.3157	NaN	1.2744	1.1357	NaN	1.2219	1.1856	NaN	1.1207	NaN	0.7180	NaN
1560	1.2597	1.1466	1.0183	NaN	NaN	0.9879	1.0711	1.2706	1.1744	1.0876	1.0628	1.1581	1.2155	1.1327	0.9721	1.0352	1.5672	1.2160	1.1792	1.0935	1.0407	0.8966	1.1295	0.8263	0.9290	0.8628	1.1613	NaN	0.7722	0.9764	0.9909	0.8823	1.3515	1.1881	1.1020	1.1246	1.0303	0.8598	NaN	1.2627	0.9006	NaN	1.0070	0.7831	NaN	1.0435	NaN	1.1179	NaN
1561	0.6822	0.8360	1.0315	NaN	NaN	0.8928	0.9516	1.1291	0.8933	0.9177	1.0146	0.9262	0.8300	0.9650	0.9737	0.8281	0.7555	0.9251	0.9033	1.0325	1.0639	1.1321	0.9745	1.1635	1.1389	1.1396	0.9736	NaN	1.0005	0.9490	0.9812	0.9913	0.6803	0.8683	1.1972	0.5134	1.1919	0.8840	NaN	0.8607	0.7923	NaN	0.8938	0.8276	NaN	0.9600	NaN	0.8143	NaN
1562	0.9206	1.0253	1.0194	NaN	NaN	0.8986	1.1136	0.9683	1.0593	1.0033	1.0002	1.0007	1.0031	0.9670	1.0469	1.1247	0.8580	1.0058	0.9329	1.0262	1.0427	0.8837	1.1929	0.9807	1.1144	0.9531	1.2144	NaN	0.9491	0.8585	1.0702	0.9215	0.8571	0.7959	0.9239	0.9724	0.9124	1.0194	NaN	1.1810	0.8543	NaN	0.8264	0.9228	NaN	0.8818	NaN	1.0074	NaN
1563	1.1719	1.0246	1.0708	NaN	NaN	0.9874	1.1575	1.2200	0.9657	1.0564	0.9735	1.0151	1.0734	1.0099	1.1343	1.1520	1.1375	1.0000	0.9516	1.0203	1.0202	0.8415	1.1249	1.1567	1.0410	1.0812	1.0301	NaN	1.0505	1.0671	0.5764	0.8444	0.9634	0.9763	0.8989	0.7351	1.0245	1.0177	NaN	0.6389	1.1485	NaN	1.0392	1.2007	NaN	1.0030	NaN	1.1769	NaN
1564	1.0054	1.0381	1.0640	NaN	NaN	0.9238	1.2632	1.3360	1.1201	1.1441	1.0991	1.2193	1.2388	1.1640	1.1893	1.1628	1.1560	1.1608	1.0902	1.0674	1.3136	1.0724	1.2004	1.2606	1.2682	1.1508	1.0198	NaN	0.9276	1.1137	1.5574	1.0556	1.5047	1.1658	1.2108	1.6221	1.0881	1.2140	NaN	1.6623	0.7902	NaN	1.0104	0.8462	NaN	1.1028	NaN	1.2692	NaN
1565	1.2806	1.1799	0.8546	NaN	NaN	0.9440	1.3537	0.9425	1.3586	1.3398	1.0126	1.3455	1.3971	1.3620	1.1045	1.1563	1.6889	1.0703	1.1601	0.9154	1.2479	1.0340	1.1205	0.8429	0.8768	0.8451	1.1543	NaN	0.9951	0.9311	0.8525	0.9985	0.5437	0.9013	1.0790	0.6524	1.0378	1.0172	NaN	0.6057	0.8644	NaN	1.2044	0.9997	NaN	1.3773	NaN	1.1733	NaN
1566	1.0716	1.1198	0.9873	NaN	NaN	1.1038	0.8357	1.1280	0.7168	0.7298	0.9509	0.8396	0.7018	0.8512	0.8894	1.1327	1.0005	0.9723	1.0397	0.9583	1.0301	0.9201	0.7734	1.1132	1.0415	0.9947	0.9516	NaN	0.9699	1.0176	1.1737	1.0856	1.0729	1.0720	0.8920	0.9750	1.1033	1.1160	NaN	1.3000	0.8187	NaN	0.8941	0.7470	NaN	0.7915	NaN	1.5021	NaN
1567	1.1897	1.0286	1.0655	NaN	NaN	0.8914	1.1022	1.3214	0.9144	0.9911	1.0238	1.0017	1.0829	1.0482	1.0386	1.0318	1.0827	1.1195	1.0449	1.0181	1.2695	1.0675	1.0717	0.9225	0.8387	0.8678	1.2600	NaN	0.8205	1.0014	0.9470	1.0869	1.0451	1.0077	0.9136	1.0820	0.9575	0.9117	NaN	0.9975	0.9804	NaN	0.7138	1.0661	NaN	1.2231	NaN	1.7076	NaN
1568	1.1345	1.2750	1.0939	NaN	NaN	1.0361	0.9162	1.1206	1.2082	1.1741	1.0801	1.2343	1.2126	1.1681	1.1259	1.3333	1.4610	1.2467	1.0910	1.0339	1.2981	1.0801	1.3609	0.9153	1.1197	1.0150	1.0959	NaN	1.1224	1.0238	1.2103	1.1144	1.1942	0.9179	0.8593	0.9749	0.9726	0.9882	NaN	0.9160	0.9935	NaN	0.6765	1.1041	NaN	1.2202	NaN	1.1015	NaN
1569	0.6827	0.8867	0.9710	NaN	NaN	0.6406	0.9718	0.9458	1.0139	0.9465	0.9127	1.1130	1.0012	1.0179	0.7251	1.0638	0.7851	1.1288	0.7768	0.9247	0.7642	0.8837	1.0182	0.6078	0.7895	0.6811	1.1227	NaN	0.9621	1.1219	0.8061	1.0910	0.8502	0.9108	1.0011	0.6892	1.0078	0.9809	NaN	0.6978	0.7477	NaN	0.8387	0.9902	NaN	0.8801	NaN	0.6827	NaN
1570	0.8767	1.1332	0.9963	NaN	NaN	0.9117	0.9896	0.8385	0.8367	0.8871	0.9577	0.9578	0.9228	0.9368	0.7635	0.9812	0.9976	0.9130	1.1273	0.9461	0.8576	0.9810	1.0118	0.8595	0.8305	0.8286	0.9859	NaN	1.1065	0.8411	0.6772	0.8173	1.0051	0.8793	1.0946	1.0010	0.9039	0.8414	NaN	0.9368	0.8670	NaN	0.8536	0.7917	NaN	1.0081	NaN	1.1784	NaN
1571	0.4497	0.4537	0.8230	NaN	NaN	0.5639	0.5828	0.6790	0.7149	0.7244	0.6252	0.6456	0.6505	0.7002	0.9445	0.6508	0.4357	0.4479	0.6967	0.7647	0.3675	0.4223	0.6862	1.3168	1.2749	1.1475	0.9094	NaN	1.2635	0.8363	0.8586	0.8246	0.5497	0.7731	1.0437	0.8949	1.1042	0.9671	NaN	0.7554	0.1743	NaN	0.6187	0.6812	NaN	0.4671	NaN	0.4751	NaN
1572	0.7016	0.8492	1.1516	NaN	NaN	0.6952	0.9000	0.7449	0.8502	0.9900	1.1165	1.0588	1.0614	1.0233	1.0245	1.1696	0.6682	0.8090	1.0297	1.1751	1.0749	1.2234	1.0644	0.9141	0.8477	0.9465	1.1043	NaN	1.1266	0.9776	1.1093	0.9500	0.8412	0.9819	1.1502	0.7603	1.0802	1.2659	NaN	0.8140	0.6069	NaN	1.3114	0.8991	NaN	0.9736	NaN	0.7920	NaN
1573	1.2126	1.0563	1.0667	NaN	NaN	0.9019	0.9440	0.7381	1.0153	1.0456	1.0829	1.1211	1.0546	1.0690	1.0828	1.1317	1.0416	1.0533	1.0305	1.1040	1.0534	0.9862	0.8980	0.8546	0.9152	0.9018	1.0103	NaN	1.0290	1.0669	1.0918	0.9496	1.5160	0.9816	0.9323	1.1179	0.9861	1.0672	NaN	1.2710	0.9811	NaN	1.2610	0.9588	NaN	1.0899	NaN	0.9715	NaN
1574	0.9435	1.1847	1.0216	NaN	NaN	1.2233	1.2191	0.9195	1.0324	1.0326	1.0166	0.9714	1.0465	1.0420	1.0016	0.9764	1.0330	0.9988	0.9280	1.0073	0.9689	1.0785	1.0954	1.2177	1.1581	1.1876	1.0615	NaN	1.0128	1.0556	1.2258	0.9880	1.0805	1.0757	1.0827	1.2496	1.1008	1.1426	NaN	1.1158	1.1166	NaN	1.0999	1.2261	NaN	1.2208	NaN	0.8096	NaN
1575	0.8330	0.9672	0.9709	NaN	NaN	1.0339	0.9005	0.7881	0.9606	0.8456	0.9986	0.8925	1.0291	0.9384	0.9756	1.1199	0.8687	0.9663	0.8747	1.0025	0.8367	1.2449	0.9386	1.0674	0.9673	0.9959	1.0278	NaN	0.9373	1.1324	1.0495	1.0198	0.6783	0.9595	1.3503	0.7468	1.1172	1.1079	NaN	0.5050	1.3168	NaN	0.8810	0.9721	NaN	0.8664	NaN	1.0812	NaN
1576	0.9170	0.8624	0.9880	NaN	NaN	0.8691	0.9286	0.8362	0.8741	0.8955	0.9398	0.9403	0.9102	0.8917	0.9511	0.6658	0.6718	1.1065	0.9718	0.9699	0.8368	0.9343	0.9614	0.9621	0.6827	1.0115	0.7526	NaN	0.8168	0.5237	0.7801	0.8329	0.8341	0.7947	1.0260	0.9759	0.7536	0.6882	NaN	0.7994	0.8276	NaN	1.1701	1.1167	NaN	0.9329	NaN	1.2258	NaN
1577	1.4006	1.0268	1.1667	NaN	NaN	0.9037	0.9730	0.8548	0.9867	1.1211	1.1513	1.0791	0.8958	1.0567	1.2448	0.9241	1.4619	1.0929	1.1518	1.0818	1.0701	1.0334	1.0945	1.0946	1.0119	1.0473	0.8429	NaN	0.8768	0.9647	1.1128	1.0423	1.3352	1.3149	0.9199	1.3467	0.9376	1.1034	NaN	1.3705	1.1303	NaN	1.1917	0.8834	NaN	1.2222	NaN	1.0904	NaN
1578	0.9366	1.2151	0.9563	NaN	NaN	0.8566	1.0878	0.7295	0.8528	0.8849	0.9761	0.9809	0.8906	0.9999	0.9601	1.0374	0.9725	0.7816	1.1545	0.9399	0.9735	0.9039	0.8936	1.1698	1.0998	1.1667	1.1561	NaN	1.0052	1.0053	1.0768	1.0515	0.9316	0.9449	1.2076	1.0807	1.0632	0.9867	NaN	0.7892	1.1525	NaN	1.4343	0.9309	NaN	1.1529	NaN	0.9538	NaN
1579	0.4055	0.7862	0.6963	NaN	NaN	0.4853	0.5887	0.8512	0.7886	0.7935	0.7465	0.7837	0.8334	0.8562	0.7863	0.7832	0.6586	0.9464	0.6596	0.6932	0.7479	0.7479	0.7534	0.8445	0.8951	0.8106	1.1210	NaN	1.0070	0.6715	0.5638	0.7480	0.6294	0.7266	0.6714	0.8014	0.9900	0.7867	NaN	0.6639	0.7450	NaN	0.4141	0.6625	NaN	0.6856	NaN	0.5568	NaN
1580	0.4762	0.4846	0.5610	NaN	NaN	0.5665	0.6166	0.4805	0.3023	0.3787	0.4579	0.3396	0.3215	0.3226	0.8558	0.4054	0.4910	0.8997	0.7217	0.4014	0.6361	0.5843	0.2929	0.9209	0.8030	1.0282	0.3970	NaN	0.8715	0.4974	0.5580	0.5927	0.4909	0.8299	0.7803	0.4956	0.8047	0.3139	NaN	0.5982	0.4731	NaN	0.6606	0.7224	NaN	0.4706	NaN	0.5463	NaN
1581	1.2414	1.6366	1.2206	NaN	NaN	1.0558	1.1460	0.9922	1.3830	1.4333	1.2243	1.4556	1.4405	1.4359	1.2522	0.9443	1.1055	1.4049	1.1809	1.2369	1.2662	1.1571	1.4289	0.9499	1.0176	0.9250	0.7633	NaN	0.9022	0.9218	1.0931	0.8007	1.0218	0.8191	0.6089	0.9521	0.9373	0.9634	NaN	0.8305	1.4873	NaN	1.5409	1.1333	NaN	1.2083	NaN	1.0833	NaN
1582	1.0816	0.9199	1.1415	NaN	NaN	1.3134	1.1331	1.1051	1.0697	0.9878	1.2038	1.0466	0.9727	1.0461	0.7798	0.9609	0.9137	1.0862	1.0902	1.1131	1.0780	1.1977	1.0376	0.7346	0.8113	0.6808	1.0055	NaN	1.2831	1.0959	1.0725	1.0917	1.1452	1.1376	0.8902	1.2100	1.0525	1.1037	NaN	1.1019	1.2143	NaN	1.1985	1.1711	NaN	1.3040	NaN	1.3912	NaN
1583	1.5049	1.6525	1.1284	NaN	NaN	1.2607	0.8815	1.2040	1.2925	1.1547	1.2013	1.2737	1.2801	1.2656	1.1132	1.0608	0.9394	1.0279	1.0393	1.1487	1.1420	0.9385	1.3177	1.1554	1.1656	1.1520	0.9103	NaN	1.3145	1.1801	0.8129	1.1926	1.2097	0.8658	1.0361	0.9856	1.2509	1.2127	NaN	1.0160	1.0104	NaN	1.2725	1.0306	NaN	1.2667	NaN	1.4174	0.8233
1584	0.9594	1.0285	0.9137	NaN	NaN	1.0196	0.9198	0.6936	0.8038	0.8411	0.9937	0.9227	0.8703	0.9158	0.8350	1.1052	0.9276	0.5232	0.9160	0.9378	1.1045	0.7850	0.8710	0.8352	0.8759	0.7741	0.9664	NaN	1.4872	1.1349	0.8223	0.9501	0.9860	0.8303	1.0421	0.9107	1.0376	1.0041	1.0399	0.8318	0.7868	NaN	1.0060	0.8504	NaN	0.9962	NaN	1.1826	1.2800
1585	0.4759	0.4239	0.9009	NaN	NaN	0.2391	0.6427	0.6081	0.6988	0.7541	0.9014	0.7713	0.7259	0.8400	1.1669	1.0512	0.5481	0.7375	0.6483	0.9579	0.4857	0.6743	0.8136	1.1096	1.3567	1.0679	1.1685	NaN	1.1766	1.0953	1.0565	0.9544	1.0628	1.0189	0.9423	0.7714	1.0063	1.1665	1.2656	1.1469	0.4222	NaN	0.6036	0.8578	NaN	0.3948	NaN	0.4003	1.0138
1586	1.2032	0.8979	1.0514	NaN	NaN	1.2970	0.9833	0.8446	1.0008	1.0080	1.0332	1.0158	0.9972	0.9901	0.8603	0.9680	1.4352	1.1415	1.3059	1.0231	1.2424	1.0285	0.9394	1.0154	1.0397	0.8661	1.0861	NaN	0.8381	0.8080	1.1195	0.9576	0.9524	1.3347	1.1731	1.0833	0.9500	1.1491	1.2159	1.0907	1.2862	NaN	1.1304	0.9711	NaN	1.4349	NaN	1.2040	1.0934
1587	1.0349	1.1436	1.1338	0.6812	NaN	1.2578	1.0795	1.1870	0.8732	0.9905	1.0800	0.9572	1.0196	0.9319	0.9525	1.1005	1.2430	1.1456	1.1543	0.9896	1.2751	1.0435	1.0960	1.0115	1.0421	0.9008	1.0277	NaN	0.9300	1.2381	1.1654	1.3506	1.2999	1.1592	1.1841	1.3576	0.9939	1.2141	0.9251	1.3729	1.3642	NaN	1.4912	1.2061	NaN	1.2619	NaN	0.9669	1.4943
1588	0.8064	0.6262	0.9751	0.5440	NaN	1.0911	1.1940	1.1516	1.0183	1.0040	0.9877	1.0487	1.0784	1.0659	0.9914	1.0741	0.5923	0.9334	0.9309	0.9513	1.1134	1.3440	0.9975	0.9732	0.8610	0.8574	0.9029	NaN	0.9514	1.2625	1.1166	1.1371	0.9956	1.1426	1.1506	1.1936	0.9939	1.1693	1.2762	1.1961	0.6606	NaN	0.9886	1.1140	NaN	1.1099	NaN	1.0256	0.7135
1589	1.3536	1.3871	1.0816	1.3784	NaN	1.3911	1.1331	0.9287	1.2161	1.1588	1.0998	1.1987	1.2454	1.1901	1.1776	1.2265	1.4592	1.2311	1.0557	1.0036	1.2272	0.9772	1.0869	0.8934	0.9863	1.0261	0.9613	NaN	1.0098	1.1800	1.0026	1.1457	0.8366	0.9907	0.9684	0.9425	1.0482	1.1087	0.9331	0.9790	1.1605	NaN	1.4258	0.9308	NaN	1.4022	NaN	1.0400	1.1290
1590	0.6267	0.6279	0.8807	0.6586	NaN	0.4474	0.5566	0.8240	0.6897	0.7182	0.8778	0.6684	0.6507	0.7824	0.9101	0.9631	0.5821	0.6232	0.7936	0.8661	0.5191	0.5091	0.6802	0.9842	0.9126	0.9397	1.0310	NaN	0.8945	0.8923	0.8123	0.9516	0.8768	0.9514	1.0733	1.0077	0.9849	0.9698	1.4369	0.8373	0.6282	NaN	0.7796	0.8214	NaN	0.4782	NaN	0.7357	1.1892
1591	1.4930	1.2649	1.1456	0.9256	NaN	1.4264	1.1968	1.2522	0.8659	0.8009	1.0786	0.9890	1.0166	1.0216	1.0033	0.9094	1.4274	0.9594	0.9721	1.1666	1.1332	1.3718	1.0000	1.1529	1.1936	1.0463	0.8503	NaN	1.0356	1.0902	0.9032	0.9235	0.8556	0.9386	0.9879	0.6109	1.0031	1.0471	1.1673	1.0720	1.2544	NaN	1.5174	1.4356	NaN	0.8572	NaN	0.8943	1.5319
1592	0.6071	0.6727	1.0357	0.9168	NaN	0.8919	0.8331	0.7051	0.7742	0.8077	0.9820	0.8984	0.8119	0.8846	0.9060	0.7592	0.5420	1.0974	0.9137	1.0798	0.9943	0.8628	0.9222	1.0657	0.8425	0.9313	1.0919	NaN	0.9472	0.8602	1.2458	0.7600	1.0495	1.2183	0.9092	0.9376	0.9406	0.8732	0.8002	1.4203	0.9671	NaN	0.8657	0.8314	NaN	0.9264	NaN	1.1375	0.5529
1593	1.0283	0.9128	1.0388	0.8529	NaN	0.8693	0.8651	0.8553	1.1281	1.0974	1.0225	1.0993	1.1183	1.0610	0.9194	0.8750	0.8505	1.1092	0.9103	1.0966	1.0829	1.2201	1.2337	0.8314	1.0321	0.9094	0.8217	NaN	1.0901	0.9767	0.7905	0.8997	0.6358	0.8328	0.7283	0.4941	0.8854	0.8670	0.7614	0.3879	1.0844	NaN	1.3762	0.9254	NaN	1.1894	NaN	1.1024	1.4275
1594	0.5559	0.6209	0.9543	0.7898	NaN	0.7279	0.7531	0.7339	1.0489	0.9369	0.9601	1.0122	1.1217	0.9860	1.1158	1.0095	1.3116	1.1498	1.1612	1.0080	1.1976	1.1461	1.1845	1.1166	1.3669	1.2083	1.0559	NaN	0.9643	0.9791	1.0282	0.9670	0.6379	0.7824	0.6958	0.7755	1.0589	1.1293	1.0210	0.9294	0.5051	NaN	1.0846	0.8154	NaN	1.0750	NaN	0.7629	0.9502
1595	0.6580	0.5925	1.0338	1.0923	NaN	1.2958	0.8555	0.7884	0.8308	0.9135	1.0172	0.9500	0.8151	0.9653	0.7534	0.8408	0.6391	0.9965	0.9405	1.1202	0.8997	0.8395	0.7488	0.7971	0.6467	0.7989	1.0500	NaN	1.0902	0.7624	0.6603	1.0336	0.8343	0.7894	0.9485	0.7790	1.0255	0.8783	1.0477	0.6711	1.0367	NaN	0.8400	0.8321	NaN	0.9300	NaN	0.7715	1.2921
1596	1.3089	1.4376	1.1176	1.4027	NaN	0.9872	0.9588	1.1591	1.1671	1.1796	1.0586	1.1993	1.1091	1.2220	1.2300	1.1512	1.0723	0.9798	1.1563	1.0633	1.0783	1.0016	1.1328	1.2149	1.2022	1.1310	0.8931	NaN	0.9570	1.1225	1.1741	0.9963	1.4089	1.3024	0.8176	1.0892	0.9436	0.9890	1.0533	1.2613	1.1544	NaN	1.3662	0.9559	NaN	1.1193	NaN	1.2309	1.3572
1597	0.5620	0.8418	0.9916	0.8974	NaN	0.7982	0.8470	0.9541	0.8754	0.8387	1.0150	0.9410	1.0266	0.9526	0.9803	0.9799	0.4918	0.8656	0.8387	1.0401	0.6537	0.9965	0.9472	1.1125	0.9856	1.0013	1.0305	NaN	0.9064	1.1343	1.3328	1.1508	1.3132	1.2279	1.1128	1.1867	0.9906	1.0545	1.2498	1.2177	0.8529	NaN	1.2486	0.9520	NaN	0.7542	NaN	0.7454	1.2669
1598	1.1426	1.0249	0.7010	1.1224	NaN	0.8324	1.1596	1.1373	0.9005	0.8928	0.9785	0.8642	0.9097	0.9604	1.0427	1.0734	1.0174	1.0911	1.0154	0.8279	1.2846	1.0599	0.9106	1.0080	1.1353	1.0101	0.7957	NaN	0.9635	1.0277	1.0169	1.0571	0.6135	0.7170	0.9252	0.8134	1.0612	0.9888	0.9802	0.9343	1.0819	NaN	0.6304	0.9795	NaN	1.1464	NaN	0.9311	0.9274
1599	1.4347	1.1516	1.0678	0.9580	NaN	1.1080	1.1665	1.1909	0.9908	1.0230	1.0219	1.0525	0.9850	1.0130	1.0665	1.0170	1.0861	0.9864	1.1155	0.9763	1.1947	1.2347	1.0052	1.0275	1.0525	1.1046	0.9800	NaN	0.7484	1.1351	1.4018	1.1275	1.4553	1.4015	0.9687	1.3614	0.9300	1.0994	1.1294	1.4015	1.4177	NaN	0.9452	1.2955	NaN	1.1054	NaN	0.7716	1.4791
1600	0.8946	1.0611	0.9619	0.6375	NaN	1.0776	0.7520	0.7164	0.8620	0.8600	0.8934	0.8141	0.6994	0.8754	0.8559	0.9787	0.8533	1.1227	0.8385	1.0226	0.8832	0.7508	0.8670	1.1501	0.9968	1.0746	1.0090	NaN	1.1052	0.9286	0.5776	0.9412	0.5685	0.6994	0.9857	0.3873	1.1454	1.0245	1.1697	0.7645	0.9343	NaN	0.9097	0.7513	NaN	0.8021	NaN	0.8595	0.6895
1601	1.7278	1.3948	1.1470	0.7907	NaN	1.0428	1.0932	1.4056	1.0126	1.0024	1.1324	1.0215	1.2165	0.9719	1.1909	0.9525	0.9602	0.9635	1.0933	1.1216	1.3159	1.4715	0.8899	0.9611	1.1345	1.0124	1.1816	NaN	1.1000	1.0944	0.9673	1.1424	1.4497	1.2937	0.9215	1.3387	0.9375	1.0629	0.8777	1.2902	1.4426	NaN	1.4924	1.1858	NaN	1.1749	NaN	0.8407	1.3850
1602	1.2821	1.1178	1.1043	1.1297	1.0531	1.4961	1.2466	0.7403	0.6827	0.7986	1.0606	0.8291	0.8919	0.8863	0.9110	1.0253	1.2675	1.0278	1.1921	1.1380	1.1291	1.1077	0.7587	0.9458	0.9676	0.8405	0.9824	NaN	0.7839	0.9013	1.1240	1.1627	1.2095	1.1859	0.9765	1.1696	0.9144	1.1519	1.0974	1.1617	1.1733	NaN	1.1295	1.0835	NaN	1.1385	NaN	0.9703	0.7740
1603	0.8858	0.9501	0.9601	1.3785	1.0170	0.8977	1.1248	1.1725	1.1749	1.1421	0.9506	1.1426	1.1368	1.1986	0.9173	0.9548	0.9595	0.9260	0.8637	0.8385	0.7975	1.0509	1.3651	0.9230	0.9702	0.8948	0.8708	NaN	1.1394	0.9324	1.0540	0.7919	1.3225	1.1075	0.8366	0.9019	0.9357	0.9844	1.1116	1.2200	1.1462	NaN	1.3365	1.0521	NaN	0.8930	NaN	0.9996	1.1266
1604	1.0570	1.2960	1.0499	0.9703	1.1624	0.9738	1.3635	1.2692	1.1635	1.1493	1.1115	1.1588	1.2894	1.1280	1.2319	0.9473	1.3739	1.1545	1.1782	1.0383	1.3887	1.4012	1.1777	1.0705	1.0395	1.1133	0.9833	NaN	0.8688	0.9705	0.8295	0.8143	1.1538	1.0569	0.8598	1.1306	1.0114	0.9536	0.8650	1.0448	1.5206	NaN	1.4119	1.0933	1.2333	1.2955	NaN	1.2780	0.9498
1605	1.1962	1.2651	1.0030	0.7412	1.4291	0.9065	1.3751	1.3099	1.0312	1.0627	1.0116	1.0674	1.1482	1.0190	1.2128	1.0680	1.3145	0.9385	1.0914	1.0960	1.0893	1.0016	0.9458	1.0880	1.1105	1.1894	0.9255	NaN	1.0822	1.2153	1.1289	1.0362	0.9413	0.9046	0.9114	1.0937	1.0296	1.0006	1.0258	1.0330	1.1774	NaN	1.4621	1.1059	0.9144	1.2326	NaN	0.9793	1.4208
1606	1.4028	1.0475	0.9325	1.5248	0.4336	0.8414	1.0804	1.0857	0.6962	0.7406	1.0583	0.7223	0.8318	0.7751	1.0221	1.2163	0.9796	0.7990	0.9020	0.9210	1.0098	0.9116	0.6226	1.0174	0.9805	0.9622	1.1775	NaN	0.9053	1.0782	1.2598	1.1094	1.2377	1.1998	0.9019	1.2718	1.0112	0.9313	1.0048	1.3812	1.0904	NaN	0.9523	1.2328	0.9895	0.9736	NaN	1.3356	1.3151
1607	1.0363	0.8923	0.9562	0.5222	1.0329	1.0189	0.7919	1.0372	1.0085	1.0329	0.9266	1.0074	0.9849	1.0754	0.7710	0.8997	0.8241	0.9415	0.9757	0.9445	0.9511	0.9724	1.0209	0.8842	0.6569	0.8431	0.8607	NaN	0.9591	0.9137	1.2412	1.1167	0.5869	0.7370	0.8004	1.0783	0.9735	0.8796	0.9902	0.6961	0.6710	NaN	0.7230	0.8146	0.9286	0.8408	NaN	0.8339	0.5611
1608	0.9660	0.8382	1.1211	1.9619	1.0775	1.1095	1.2003	1.4503	0.9548	1.0429	1.0740	0.9762	1.0173	1.0308	1.1356	1.0474	0.9616	1.1553	0.9548	1.1451	1.1703	1.4447	1.0727	1.2475	1.0706	1.1252	1.1777	NaN	1.2810	0.9783	1.3870	1.0984	1.2488	1.3094	1.0211	1.3927	1.1597	1.1643	1.1374	1.7069	1.4770	NaN	1.2820	1.3191	0.9344	1.1610	NaN	0.8572	1.3873
1609	1.3157	1.2007	1.0291	1.6501	0.9419	1.1232	0.9801	0.6968	1.1505	1.1728	1.0325	1.1400	1.0622	1.0840	1.0005	0.9910	1.4039	1.0554	1.1315	1.0229	1.0216	0.8289	1.0603	0.8960	0.9258	0.9286	0.8413	NaN	0.8726	1.0029	0.6940	1.0021	1.0234	1.1255	0.8875	0.8481	0.9443	0.8827	1.1441	0.9266	1.0836	NaN	1.2719	0.9659	1.1473	1.0762	NaN	1.1512	1.1342
1610	1.2738	1.1411	1.1544	1.5235	1.1236	0.9467	1.1998	1.6646	0.9417	1.0133	1.1531	1.0250	0.9741	1.0290	1.0469	1.2460	1.5078	0.9727	1.0825	1.0843	1.3405	1.1084	0.9645	1.0814	1.1790	1.1320	1.0902	NaN	1.2313	1.2504	1.7253	1.2451	0.8686	1.2131	1.1719	1.0592	1.0739	1.3120	1.3971	1.0911	1.1186	NaN	0.7371	1.4005	1.2702	0.9921	NaN	1.2553	0.5847
1611	1.1185	1.2110	0.9495	1.2154	0.9698	1.0359	1.0677	0.9331	1.1925	1.2369	1.1032	1.2136	1.2633	1.1700	1.1665	1.2217	0.9999	0.9683	0.8672	1.0482	1.1679	0.9500	1.1392	1.0236	1.1693	1.1211	1.0337	NaN	1.3164	1.2153	0.9175	1.0846	1.2329	1.0433	0.9839	0.9485	1.1334	1.1304	0.9720	1.2315	1.0997	NaN	1.0637	0.8966	1.1081	0.7527	NaN	1.3475	0.4682
1612	1.1048	1.0619	1.0143	1.2231	0.8125	0.8847	0.9929	1.1171	0.8230	0.8798	0.9737	0.8500	0.8474	0.9120	0.9707	1.0108	0.8193	0.9487	0.9486	1.0879	1.0139	1.2299	0.7521	0.9834	0.9693	0.8475	1.0926	NaN	1.0963	0.9419	0.8519	0.9031	0.9871	0.9413	0.8963	0.9511	1.1043	0.9503	0.2981	0.7047	1.0144	NaN	1.0978	1.0754	0.9354	0.9031	NaN	1.2490	0.6534
1613	0.3901	0.6623	0.9347	1.1322	0.8677	1.0329	0.5817	0.7609	0.6946	0.7198	0.7717	0.7410	0.7063	0.8247	0.8369	0.9100	0.6225	0.6553	0.7920	0.9836	0.2586	0.4970	0.7232	1.1152	1.1040	0.9275	1.1230	NaN	1.2342	0.9674	0.8059	1.1177	0.8587	0.9733	1.0534	0.7344	1.1040	0.7655	0.6570	0.9440	0.2918	NaN	0.5544	0.6596	0.8501	0.4140	NaN	0.3905	0.2022
1614	1.1770	1.1213	1.0463	0.8100	1.1795	1.0880	0.9533	1.5523	1.1927	1.0654	1.0697	1.0984	1.2385	1.2292	1.2457	1.1994	0.9342	1.3249	0.8461	1.0163	1.0468	0.9808	1.0655	0.9717	0.8848	1.0592	1.1502	NaN	0.9915	0.7821	0.9653	0.6849	0.8468	0.9228	0.6047	0.8118	0.9483	0.9079	0.7200	0.9008	1.0735	NaN	1.0541	0.9038	1.0752	0.8055	NaN	1.0393	1.2146
1615	1.1985	1.2542	1.0568	1.1739	1.0198	1.3841	1.0277	1.0192	0.9701	1.0703	1.1174	1.0075	1.1009	1.0505	1.1155	1.2299	1.0248	0.9407	1.0707	0.9425	1.1070	1.1287	0.8529	1.0105	1.0516	0.9035	1.1924	NaN	1.0713	1.3179	1.1002	0.9586	0.8610	0.8000	1.0569	1.0257	1.2249	1.1376	0.9459	0.8077	1.0618	NaN	0.8741	0.9848	0.7985	0.8442	NaN	0.9579	1.0863
1616	1.3132	1.2696	0.8973	1.1193	0.9465	1.1979	1.0712	1.0416	1.2280	1.2071	1.0175	1.2767	1.3251	1.2630	1.0642	1.0475	1.6228	1.1286	1.1132	0.9183	1.1380	0.9915	1.2285	0.9680	1.2050	0.9289	0.9657	NaN	0.9890	0.9224	1.0817	0.8157	0.8089	0.8994	0.9488	1.1254	0.9680	0.8790	1.1111	0.6163	1.3051	NaN	0.9819	0.8262	0.8500	1.0806	NaN	1.3267	0.5008
1617	1.1140	1.0388	1.0320	0.9880	0.9292	0.9567	1.1893	1.3397	1.3124	1.1935	1.0329	1.1939	1.1466	1.1559	1.3199	1.3443	1.0473	1.0569	1.0748	0.9927	1.1380	1.1357	1.2499	1.0723	1.0296	1.0363	1.1249	NaN	1.0506	1.2158	1.2953	1.1293	1.4234	1.2107	1.0583	1.1197	1.1552	1.1082	1.3066	1.4072	1.0059	NaN	1.2152	1.0097	1.1422	1.0921	NaN	0.8953	0.4288
1618	1.0588	0.9675	0.8811	1.0057	0.8707	0.8356	0.8663	0.8746	0.6138	0.7678	0.9575	0.7196	0.5263	0.7757	0.9399	1.1226	0.6852	1.0414	1.0190	0.9380	0.8773	0.8336	0.6777	1.1939	0.7014	0.9294	1.1653	NaN	1.1624	0.9773	0.7659	0.9929	0.6611	0.9917	1.0784	0.5383	0.9321	1.0741	0.7839	0.8500	0.8020	NaN	0.8048	0.7856	0.8476	0.7971	NaN	0.7027	0.3360
1619	1.0841	1.0945	1.0329	0.8479	1.0975	1.0372	0.9353	0.9759	1.1119	1.0780	0.9119	1.1094	1.1866	1.0849	0.8510	0.8663	0.8735	0.8478	0.9466	0.9945	0.8831	1.1640	1.0079	0.9657	0.8635	1.0172	0.8622	NaN	0.6241	0.7983	1.1538	0.6305	0.7426	0.8381	0.7220	0.6272	0.7076	0.7129	1.0152	0.9393	0.8050	NaN	0.8416	0.9988	1.2269	1.0493	NaN	0.8335	1.0603
1620	1.2952	0.8397	1.0778	0.7065	1.0166	1.3060	1.1188	1.1724	0.9477	1.1043	1.0588	1.0131	0.9312	0.9744	0.9571	0.9631	1.1917	1.0515	1.0652	1.1181	1.1114	1.2434	0.9124	0.9913	0.9620	0.8911	1.0265	NaN	1.0773	0.8006	0.7367	0.7960	0.8895	0.8904	0.9054	0.7180	0.9745	0.9179	1.3721	0.9499	1.0987	NaN	0.9459	1.0976	0.9191	1.3056	NaN	1.8942	0.9341
1621	0.5832	0.5895	1.0632	0.8695	0.9866	0.7400	0.8283	0.6826	1.1094	0.9649	1.0077	1.0170	1.0429	0.9760	0.9467	0.8514	0.7180	0.9912	0.9288	1.0377	0.7878	0.9024	1.1097	1.0754	0.9006	0.9245	1.0933	NaN	0.9100	0.9256	1.0851	1.0439	1.4536	1.1203	0.9460	1.1759	1.0115	0.9473	1.1795	1.2290	0.6676	NaN	0.9690	0.8085	0.9553	0.6930	NaN	0.6275	0.6358
1622	0.8173	0.7321	0.8918	0.8413	0.9438	0.6505	0.6753	0.8542	0.8297	0.9074	0.8387	0.9332	0.8199	0.9773	0.6959	0.8556	0.8787	0.9607	0.9176	0.9693	1.1252	1.1656	0.9530	1.0049	0.8011	0.8556	0.9556	NaN	1.2690	0.9735	0.7680	1.1379	0.9025	0.7141	0.8657	0.7739	1.0897	0.9799	1.1750	0.7230	0.7266	1.1083	0.7672	0.7492	0.8470	0.8957	NaN	0.7830	0.4933
1623	1.6308	1.1507	1.0765	1.1306	1.0977	1.0572	1.0559	1.3016	1.2975	1.2077	1.1564	1.3019	1.2885	1.2891	1.0949	1.0104	1.2400	0.8030	1.0013	1.1129	0.9459	0.8854	1.1523	1.0647	1.0490	1.1108	1.1113	NaN	1.1348	1.0560	0.8358	0.9890	1.3058	1.1133	0.9486	0.9905	1.0624	0.9573	0.8224	1.1716	1.3823	1.0058	1.0806	1.2363	1.0021	1.2756	NaN	1.2063	1.1529
1624	0.9773	1.0683	1.1391	2.1535	1.1779	1.1937	1.0579	1.1990	0.7597	0.8607	1.0799	0.7873	0.6854	0.8672	1.0863	1.0516	0.9361	0.7712	0.9889	1.1294	0.8348	1.0029	0.7228	1.3556	1.4553	1.3308	1.0771	NaN	1.2177	0.9604	1.1604	1.0171	1.4060	1.2127	0.8859	1.6284	1.0778	1.0384	0.8915	1.4213	0.9430	0.9094	0.6304	1.0879	1.0125	0.7431	NaN	1.0145	1.0996
1625	1.3330	1.1661	1.0800	0.9320	1.0280	0.9065	1.1304	1.0885	1.3482	1.3385	1.0598	1.2620	1.2933	1.3101	1.3882	1.2384	0.7745	1.1697	0.9209	0.9780	1.1050	1.2480	1.2841	0.9351	1.2516	1.1811	1.2705	NaN	1.0069	1.1379	1.0241	1.1304	1.1902	1.0295	1.0630	1.3148	1.0905	1.1770	0.8820	1.1689	1.4210	1.1860	1.2900	1.2363	1.1885	1.0703	NaN	1.3835	1.0721
1626	0.7486	0.6551	0.8940	0.9694	0.8623	1.0586	0.9649	0.8564	0.8792	0.8805	0.9089	0.8749	0.8694	0.8961	0.7035	0.8816	0.7596	0.8783	0.8472	1.0548	0.5935	0.9393	0.8587	0.5635	0.5140	0.6511	0.7165	NaN	0.5003	0.7010	0.6629	0.8546	0.5365	0.7265	0.7787	0.7212	0.7962	0.8389	0.9645	0.7865	0.9380	0.9317	0.8611	1.0837	0.8983	0.7867	NaN	0.8171	0.8939
1627	1.3598	1.2035	0.8782	1.0021	1.0212	1.1474	1.0261	1.0945	1.1708	1.1286	0.9847	1.1124	1.1201	1.1500	1.0298	1.0352	1.3534	1.0538	1.0325	0.9828	1.0336	1.0077	1.1140	0.8188	0.9558	0.9580	0.7802	NaN	0.6678	0.8950	0.8830	0.9206	1.2234	0.8922	0.9414	1.1661	0.8412	0.8766	0.6881	0.9196	1.1425	1.0417	0.8262	0.7972	0.9492	1.1503	NaN	1.2190	1.2401
1628	0.9683	1.1689	1.0402	0.7423	1.1481	0.7751	1.1182	1.1360	1.1207	1.1730	1.0515	1.1384	1.0671	1.1217	1.0100	0.8853	1.2206	0.9354	0.9900	1.0084	0.9517	0.8270	1.1007	0.9763	0.9793	0.9611	0.8622	NaN	0.8053	1.0684	1.0483	0.9416	0.7659	1.0612	0.9351	0.9177	0.9753	1.0109	0.9991	0.7300	1.2082	1.0822	1.0046	1.2470	0.8608	1.0864	NaN	1.2383	1.0706
1629	0.6260	0.7454	0.9230	0.8319	0.7509	0.6598	0.7974	0.8390	0.7966	0.9233	0.9212	0.8742	0.8913	0.8521	0.9229	0.6603	0.5966	1.0065	0.8755	0.8848	0.9526	0.7957	0.8587	1.0648	0.9509	0.9441	0.6038	NaN	1.1154	0.7407	0.7921	0.7664	0.7176	0.8654	0.7475	0.7553	1.0589	0.4822	1.2372	0.9939	0.6846	0.8839	0.8280	0.9558	1.0637	0.6262	NaN	0.7174	0.5726
1630	1.0854	0.9963	1.1249	1.2639	1.0780	0.9971	0.8909	0.9450	0.8449	0.8891	0.9729	0.9087	0.9232	0.9389	0.9223	0.9580	0.9752	0.9819	0.9836	1.0995	0.9845	0.9930	0.8280	0.9840	0.9156	0.9235	1.0723	NaN	0.9292	0.9268	0.7208	0.9552	1.1807	1.0516	0.7671	1.0793	0.9616	0.9802	0.8598	0.7725	1.1002	1.0322	0.8529	0.9583	1.1690	0.9117	NaN	0.9799	1.1694
1631	0.7015	0.6162	1.0343	1.0874	0.9104	0.9550	0.8997	0.8123	0.7124	0.7865	0.9063	0.7415	0.7148	0.7864	0.7857	0.9569	0.6728	0.9566	0.9510	0.9133	0.9309	0.9033	0.7126	0.7376	0.8433	0.8584	0.9537	NaN	0.9059	0.7534	0.9125	0.9042	0.9511	0.8531	0.9089	1.0098	0.9533	0.9657	1.1845	1.2215	0.7847	0.9225	0.5273	0.9772	1.0638	0.6544	NaN	0.8265	0.5158
1632	0.6118	0.6931	0.7251	0.7484	0.7721	0.4496	0.6304	0.7857	0.9442	0.9857	0.6136	0.9070	0.8791	0.9876	0.8578	0.7594	0.6897	0.9653	0.8374	0.9123	0.7418	0.8997	0.8362	0.8063	0.8857	0.9049	0.9653	NaN	0.9909	0.9431	0.7936	0.7679	0.6007	0.7371	0.8136	0.4426	1.0329	0.9496	1.2082	0.7169	0.7806	1.1581	1.1720	0.8181	0.8855	0.8530	NaN	0.6777	0.7536
1633	0.8019	0.9028	1.0908	0.8067	1.5245	0.8372	0.9609	1.0432	0.9603	0.9857	1.0669	0.9345	0.9819	0.9401	1.1532	1.0992	0.5703	0.7349	0.9323	1.0929	0.8351	0.9971	1.0925	1.2856	1.5366	1.3120	1.0203	NaN	1.1066	1.1362	1.3522	1.2158	1.5450	1.2934	1.1114	1.4020	1.0863	1.1339	1.0284	1.5163	1.1545	1.5051	1.1778	0.9499	1.3159	1.1843	NaN	0.7435	1.6050
1634	0.6593	0.7764	1.0607	1.0040	0.8794	0.7082	0.8407	0.4757	1.0816	1.1959	0.9851	1.0692	1.2712	1.1298	0.8859	1.0240	0.7526	1.0141	0.8200	1.0481	0.8637	0.9161	1.0689	0.8265	0.7930	0.8117	0.9971	NaN	1.2322	1.2226	1.1969	1.3224	1.4626	1.3381	1.2055	1.3082	1.0437	1.0258	1.1382	1.3334	0.4855	0.8746	1.3789	0.7978	0.9390	0.8389	NaN	0.6804	1.0046
1635	1.2464	1.3321	1.1264	1.1178	1.0596	0.9135	1.1494	1.2272	0.8801	0.9625	1.1251	0.8411	0.8328	0.9290	0.8526	1.0704	1.4529	1.0647	1.1459	1.0895	1.1052	1.2447	0.9401	0.8493	1.1086	0.8260	1.1200	NaN	0.9339	1.2157	1.0930	1.1506	1.1114	0.9249	0.9137	1.2434	1.0787	1.0757	0.9039	1.1748	1.1213	1.1513	1.1509	1.0196	0.9879	1.3236	NaN	0.8813	1.0804
1636	0.7803	0.8710	1.1395	1.4432	0.9802	1.0962	0.9512	0.8240	1.0961	1.1762	1.0860	1.0452	1.0306	1.1177	1.2144	1.2828	1.2420	1.2133	0.9028	1.0728	1.0129	0.9231	1.1123	1.2277	1.3879	1.2227	1.1897	1.1140	1.3061	0.9936	0.7835	1.0512	0.7418	0.7797	0.8319	0.9655	1.3497	1.2557	1.2590	0.6629	0.7707	0.9224	0.7331	1.0121	0.7222	0.9279	NaN	0.7425	0.5718
1637	0.5108	0.5399	0.8651	0.8073	0.9932	0.8994	0.6930	0.7050	1.0937	1.1664	0.7264	1.1580	1.0789	1.1419	0.7991	0.6741	0.5018	0.9960	0.7033	0.9343	0.6654	0.7151	1.0101	0.8108	0.6762	0.9217	0.6038	0.9011	0.9762	1.0352	0.6778	0.9132	1.2410	1.0331	0.9626	0.7461	0.9560	0.8190	1.1888	1.0284	0.8395	0.8372	1.0415	0.7883	1.1252	0.6452	NaN	0.9626	1.1398
1638	1.1028	1.0771	0.9688	0.8389	1.2459	0.9432	0.7929	0.9326	0.7788	1.0341	1.0176	0.8793	0.9339	0.8723	0.9098	0.9416	0.6822	0.9101	0.9225	1.0356	0.9363	1.0802	0.9665	0.8570	0.8940	0.8882	0.8518	0.8038	0.8989	0.8523	0.9337	1.0914	1.1448	1.0937	0.8011	1.2512	0.8734	0.9758	1.0497	1.1322	1.0385	0.9956	0.6973	0.8871	1.3400	1.2170	0.9741	1.4536	1.0685
1639	0.5388	0.7853	0.9233	0.6989	0.8214	0.7079	0.6870	0.7131	0.8959	0.9661	1.0850	0.9158	0.9715	0.9419	0.8682	0.8379	0.9162	1.0267	1.1026	1.0214	1.0796	1.2043	0.7989	0.9305	0.8033	0.8396	0.7783	0.9824	1.1093	0.5087	0.5897	0.6069	0.6189	0.8888	0.5822	0.4439	0.9249	0.6031	0.7841	0.6948	1.0406	0.6167	0.4447	0.7440	0.4190	0.8969	0.4742	0.7801	0.3331
1640	1.4265	1.3742	0.9927	0.7210	0.9447	1.0819	1.0469	1.4319	1.2240	1.2756	1.1194	1.2107	1.1493	1.1486	1.0216	1.0466	1.2525	1.1049	1.2180	1.0676	1.1735	1.1714	1.1466	0.9699	1.1375	1.1520	1.0476	1.0534	1.0857	1.0554	0.9921	1.0269	0.8638	0.9598	0.9445	1.1833	0.9325	0.9872	0.9382	1.1953	1.3546	1.2050	1.3728	1.2281	1.1541	1.2121	1.3392	1.2301	1.0381
1641	1.1009	1.0145	1.0757	0.8117	0.8862	1.3255	1.0646	1.1885	0.7504	0.8877	1.1110	0.8774	0.8527	0.8521	0.9968	1.2592	1.1962	0.9446	1.1309	1.0358	1.1436	1.1158	0.7281	1.1987	1.1621	1.1063	1.2852	1.2485	1.0041	1.4199	1.0959	1.1857	1.5142	1.2909	1.0086	1.2443	1.1394	1.2568	1.1943	1.2839	0.9737	1.0904	1.5946	1.6188	1.3857	1.0583	1.1895	1.1588	1.0376
1642	1.1231	1.1702	1.0825	0.7345	1.1401	1.1083	1.0344	1.3726	0.6299	0.8263	1.0512	0.7665	0.8471	0.8147	1.2403	1.0552	1.4169	0.8961	1.1242	0.9887	1.3158	1.3197	0.8807	1.3696	1.6087	1.3224	1.1844	1.2981	0.8398	1.0128	1.0730	1.0320	1.5145	1.1028	1.2188	1.0938	0.9225	1.2649	1.4526	1.0851	1.1464	0.9364	0.8505	1.0006	1.1211	1.2173	0.9156	0.7564	1.0160
1643	0.6706	0.7033	0.8650	0.7067	0.7551	0.7018	0.9745	0.7812	1.0616	1.0174	0.9453	1.0938	1.2527	1.0607	0.8585	1.0953	0.7297	0.8978	0.7758	0.8773	0.9200	0.8708	1.0542	0.9237	0.7631	0.9868	1.1119	1.0963	0.9948	0.8746	1.0336	0.7214	0.9960	1.0488	0.9014	0.9215	1.0444	1.1781	0.8134	0.9137	0.6376	0.9580	0.7532	0.7567	1.1241	0.6423	0.8803	0.6339	0.8000
1644	0.9960	1.0382	1.0884	0.8408	1.0561	1.1532	0.8668	1.1228	0.9116	1.0110	1.0392	0.9838	1.0611	1.0002	1.1716	1.0785	1.2004	1.0261	0.9990	1.1065	1.2506	1.3434	0.9998	1.1796	1.0940	1.1574	1.1624	1.1485	1.1244	1.0039	0.7227	0.9164	0.9362	0.8943	1.0424	0.9025	1.1018	1.2117	0.9442	0.6884	1.1605	1.0013	0.9478	1.1151	1.0356	1.2340	0.8543	0.8626	0.9477
1645	1.0338	1.0105	0.9699	0.8760	1.2409	0.9196	0.8592	0.8839	0.9448	0.9930	0.9937	0.9915	0.9552	0.9753	1.1697	1.0271	1.0261	1.0708	1.1013	1.0690	1.0111	0.8070	0.8851	0.9218	0.7731	1.0817	0.9365	1.0177	0.8270	0.9384	0.7132	0.8621	0.7141	0.7503	0.9553	0.7747	1.0102	1.0848	0.8444	0.7578	0.8573	0.9186	0.6653	0.7974	0.8166	0.9433	0.8534	0.7179	0.5469
1646	0.8232	0.8396	0.9508	0.9417	0.7903	0.8024	1.1160	1.2233	0.9832	1.0178	0.9756	1.0769	1.0842	0.9973	0.9998	0.8041	0.8050	0.9106	0.9847	0.9185	0.8747	1.0137	0.9389	0.8900	0.9221	1.0000	0.6296	0.8281	0.5361	0.9096	1.0513	0.8316	0.7835	0.8072	0.7971	0.7864	0.7587	0.7209	0.8656	0.8228	0.7923	0.8948	0.9497	1.0860	0.9392	0.7503	0.8719	0.9973	1.2867
1647	0.9393	0.8131	1.0580	0.8419	1.0478	1.1579	0.8463	0.9560	0.8296	0.9301	0.9250	0.9130	0.8976	0.9240	1.0009	0.8712	0.7635	0.9667	1.0531	1.0171	1.0180	1.1870	0.7246	0.9158	0.9041	0.8944	1.0481	1.0749	0.8852	1.1249	0.9101	1.2119	1.0631	1.0090	1.0726	1.0048	0.8949	0.9755	0.9240	1.0851	0.8264	0.9729	0.9562	1.0691	0.9201	0.7926	1.0290	0.9362	1.1776
1648	1.0472	0.9554	0.9805	0.8467	1.0538	1.1222	0.9600	1.1075	1.2722	1.3506	1.0413	1.1488	1.1775	1.1897	1.1965	1.0354	0.7832	0.8617	0.9366	0.9712	0.8541	0.9020	1.1588	1.2926	1.2043	1.2650	0.8729	1.0687	1.1442	0.8975	0.8882	0.9540	1.1572	1.0916	1.1950	0.9251	0.9260	0.9874	0.9453	0.9723	1.1687	0.9307	0.7455	0.9680	0.8689	0.8410	1.0386	0.7881	1.1833
1649	1.2270	1.2808	0.9975	0.8391	1.2507	1.5483	1.6815	1.3025	1.1975	1.3141	1.0211	1.1729	1.1444	1.2002	1.0596	0.9387	1.4826	1.0964	1.2114	0.9592	1.3076	1.3228	1.1346	1.0502	1.0491	1.0895	1.2041	1.0264	1.1630	0.9556	1.0206	1.0635	0.6638	0.9576	1.2254	0.7774	1.0547	1.0216	0.9744	0.7484	1.2479	1.1971	0.9684	1.3018	1.1185	1.5236	1.0243	0.9469	1.2250
1650	0.9579	0.7653	0.9283	0.9234	0.9602	1.3535	0.7119	0.8150	0.9213	0.9480	0.8593	0.9197	0.9401	0.9357	1.0560	1.3174	0.9339	0.9412	0.9170	0.8952	0.9515	0.9878	0.8993	1.1970	1.2616	1.1473	1.2341	0.9421	1.2523	1.0774	1.0868	0.9816	1.1693	1.0590	0.9833	1.1374	1.1060	1.0997	0.8660	0.8386	0.7163	1.1290	0.8531	1.0099	0.9833	0.8446	0.7129	0.8617	1.0783
1651	1.5058	1.2215	0.9946	0.7737	1.1114	1.2468	1.2192	1.1174	1.1952	1.2586	1.0782	1.1995	1.1453	1.1984	1.0175	0.9888	1.1910	1.1685	1.2497	1.0038	1.1703	1.1214	1.1454	0.7801	0.8106	0.8771	0.9302	1.1947	0.9831	1.0113	0.8811	0.8067	0.7298	0.8497	0.7919	0.9861	1.0046	0.8735	0.9778	0.7700	1.2040	1.0811	1.1370	1.0257	1.1331	1.1139	1.1497	1.1136	1.0573
1652	0.8400	0.8632	1.0389	0.8426	0.9005	0.8187	0.7288	0.6369	1.0222	1.0639	0.9955	1.0527	1.0643	0.9626	1.0199	1.1638	1.0174	1.0694	0.9334	1.0933	1.0707	1.1498	0.9682	1.2288	1.2986	1.0690	1.0972	0.9684	1.0690	0.9958	0.8795	0.8663	0.5686	0.7086	0.8564	0.3893	1.0405	1.1585	1.0203	0.6956	0.8981	1.0520	0.8190	0.7417	0.8555	0.8342	0.7477	1.0386	0.7947
1653	0.7605	0.8205	0.7321	0.7200	0.8401	0.7296	0.7624	0.7441	0.7346	0.7673	0.8635	0.8047	0.7288	0.8248	0.7837	0.8186	1.0464	0.6440	0.7466	0.6820	0.7313	0.8433	0.6873	0.6750	0.5926	0.6061	1.0121	0.8463	0.7983	0.9328	0.8278	0.7710	0.8878	0.8219	0.9260	1.0064	0.9911	0.9244	0.8447	0.8989	0.7192	0.9228	0.7415	0.9112	1.0006	0.7318	0.6791	0.8260	0.8312
1654	0.4699	0.4880	0.8418	1.2917	0.7710	0.4504	0.7655	0.5192	0.8312	0.7943	0.7345	0.7533	0.7511	0.8324	0.9956	0.9449	0.5020	0.7287	0.8097	0.8594	0.5105	0.8195	0.8154	1.0159	1.0365	0.9048	0.9896	1.0485	1.2595	0.7524	1.1262	0.8504	0.9562	1.1998	1.0590	1.0118	1.1203	0.8473	1.1780	0.9335	0.5145	0.6702	0.7717	0.6609	1.0268	0.5495	0.6875	0.6478	0.6891
1655	0.6964	0.7653	0.9317	0.8112	0.7325	0.7393	0.8668	0.9976	0.7712	0.8503	0.9015	0.8107	0.7393	0.8171	0.7143	0.5631	0.8534	0.7614	0.8113	1.0155	0.9285	0.8076	0.7704	0.5727	0.5272	0.5800	0.5687	0.5942	0.7518	0.7463	0.6446	0.5803	0.7363	1.0864	0.6234	0.7856	0.7437	0.6183	0.8462	0.6746	0.8399	1.1072	0.9169	0.8564	1.1048	0.7350	0.7990	0.9694	0.7688
1656	1.7279	1.5241	1.1509	1.1184	0.9568	0.9924	1.1218	1.1768	1.0356	1.0699	1.1629	0.8583	1.0665	1.0275	1.2573	1.0980	1.7399	1.2186	1.1636	1.1315	1.1158	0.9018	1.0937	1.0606	1.2520	1.1066	1.1914	0.9855	1.1641	1.0041	1.1443	0.8813	1.3929	1.0782	1.1969	1.6453	1.0232	1.1605	1.1654	0.9367	1.5540	1.3435	1.0394	1.3317	1.0945	1.3613	0.9465	0.8838	1.5787
1657	0.8150	0.8221	1.0355	0.8475	1.1014	1.2629	1.0670	1.1297	1.1255	1.0635	1.0124	1.0536	1.0068	1.0111	0.6124	1.0314	0.8330	1.1194	1.1342	0.9569	1.1047	0.7620	1.1303	0.7304	0.6339	0.7366	0.8049	0.8164	0.7803	0.7429	0.6150	0.7562	0.7049	0.8360	0.8843	0.6652	0.9464	0.7514	0.7040	0.8008	0.7728	1.0217	0.8641	0.9484	0.8899	0.9883	1.1916	1.1962	0.7821
1658	0.8546	0.7775	1.0318	0.8646	1.0692	0.8702	0.6931	0.6728	0.9143	0.9701	1.0342	0.9256	0.8487	0.9310	0.8274	0.9549	0.8804	1.0992	1.0414	1.0807	1.0495	1.0585	0.8395	0.9794	0.8482	0.9107	1.0607	0.9521	1.0473	0.9029	0.8082	0.9614	1.1749	1.0077	1.1436	1.2399	1.0590	0.8324	1.0014	0.8269	0.7417	0.9706	0.9466	0.9372	0.8969	1.0059	0.9074	1.3215	0.6669
1659	0.6067	0.9266	0.9133	0.7523	0.8682	0.8632	0.9028	0.9133	1.0871	1.1682	0.9688	1.0896	1.0538	1.0302	0.9712	1.0510	0.8889	0.9866	1.0693	0.9918	1.0024	0.8712	0.9768	1.0592	1.1529	1.0548	1.0723	0.9242	1.1783	1.0055	1.0485	0.9868	0.6903	1.0757	0.8757	0.7194	0.9803	0.9866	0.8440	0.7618	0.9311	1.0401	0.8990	1.0609	0.9804	0.7922	0.7783	0.8091	0.7018
1660	1.4714	1.0006	1.0010	1.1509	1.0506	1.1061	1.1770	1.3163	1.2336	1.2125	1.0866	1.1345	1.1196	1.1489	1.2763	1.1322	1.7033	1.0696	1.1652	1.0808	1.0871	0.9061	1.0926	1.3935	1.6464	1.3716	1.1785	0.8471	1.3248	1.0995	0.9703	1.1384	0.6223	0.8863	1.0055	0.5036	1.0337	1.1374	1.1747	0.6939	1.5086	0.9934	0.8012	1.0589	0.9800	1.2367	0.7723	0.9014	1.4487
1661	1.1655	1.1390	1.0996	0.7780	1.3333	1.2576	1.3609	1.1353	0.9622	1.0518	1.0532	1.0191	0.9761	0.9754	1.1042	1.1790	1.2822	0.9876	1.0673	1.0817	1.3062	1.2187	1.2210	1.2535	1.3989	1.1107	1.2828	1.0054	1.2169	1.0781	1.2890	1.0882	1.4388	1.1439	1.2417	1.4057	1.0710	1.2835	1.1685	1.2174	1.2078	1.1899	1.2998	1.2454	1.0276	1.3165	1.2772	0.9224	1.4820
1662	1.2440	0.9945	0.9847	0.9712	1.1337	1.1133	0.9079	1.1017	0.9015	0.9095	1.0176	0.8918	0.8503	0.8971	0.8070	1.0353	1.0448	0.8929	0.9950	0.9220	1.2140	0.8385	1.0015	0.7037	0.6217	0.8745	0.7948	0.9353	0.8886	0.9403	0.9248	0.9009	1.0084	1.0258	0.8740	0.9823	0.8691	1.0736	1.0675	1.1351	1.3353	1.1562	1.2445	0.9271	1.0470	1.3795	1.0153	0.7557	1.3549
1663	0.7226	0.7571	1.0443	1.0986	1.4351	0.7499	1.1838	0.8077	0.7622	0.8437	0.9827	0.8006	0.7803	0.8016	0.8325	0.9345	1.1167	0.7763	0.9461	1.0436	0.7463	0.8726	0.7129	1.0675	1.1356	0.8810	0.9403	0.9831	0.8651	1.0459	1.1786	1.0677	1.0322	0.7278	0.9283	0.8923	0.9823	1.2663	1.2135	1.0493	0.9425	0.9660	1.0671	0.9764	1.3413	0.6802	1.1756	1.1606	0.8517
1664	1.3150	1.0277	0.9045	1.0493	1.1641	1.1366	1.0340	1.0294	1.2352	1.3241	1.0366	1.1027	1.1291	1.1020	0.9556	1.0849	1.3615	1.0894	1.1376	0.9346	1.1357	1.0152	1.0940	1.0119	0.8461	0.8903	1.0314	1.0432	0.9990	0.9628	0.8063	0.8745	1.1034	1.0484	0.8028	0.8362	0.9558	0.9598	0.6114	1.1205	1.3457	0.8981	1.1308	1.0762	0.9553	1.4049	1.2400	0.8246	1.0249
1665	0.8094	0.8046	0.9252	1.0208	1.1598	1.1444	1.1146	1.1023	1.0635	1.0094	1.0386	0.9621	0.9946	0.9828	0.9894	0.9395	0.8269	0.8575	0.9232	0.9103	0.8502	0.7727	1.0093	0.9505	0.8602	0.9867	0.9343	0.9955	0.8843	0.9571	0.7559	0.8363	1.2006	1.2221	0.7943	0.9803	0.9329	0.6813	0.5443	1.1954	0.9359	0.9183	1.1140	1.0430	0.9520	0.7664	1.2141	1.2068	1.3581
1666	0.7223	0.7174	1.0151	0.9839	0.9081	0.9567	0.7475	0.8022	0.9167	1.0292	1.0368	0.9067	0.8753	0.9396	1.2022	1.0349	0.8377	0.9173	0.9438	1.0823	0.8832	0.9882	0.8956	1.0956	1.5016	1.2232	1.2835	1.1007	1.1641	1.0601	1.3034	1.0747	0.9957	1.2645	1.0527	1.2580	1.0491	1.2491	1.0143	0.7179	1.0595	1.0450	0.9251	1.0491	0.9825	0.6876	0.8587	0.8988	1.0419
1667	0.5737	0.8137	0.9115	0.8987	0.7596	0.8542	0.6915	0.7119	0.8371	0.8416	0.8080	0.8508	0.8231	0.8749	0.8600	0.7636	0.6265	0.9705	0.7378	0.9260	0.9185	1.0126	0.7881	0.7973	0.8355	0.8326	0.6243	0.8701	1.0812	0.7446	0.7841	0.7943	0.5186	0.9242	1.0279	0.7640	1.0320	0.6794	1.2136	0.7147	0.9786	0.6778	0.4731	0.7775	0.6369	0.9194	1.1587	0.4721	0.3665
1668	1.3676	1.2419	1.0287	0.6988	1.1065	1.1033	1.1097	1.2474	0.9001	0.9100	1.0577	0.9028	0.8583	0.8821	0.9232	0.8930	1.1844	0.9708	1.1182	1.0550	0.9566	0.8731	0.8161	0.8745	0.9608	0.9280	1.0824	0.8900	0.9072	0.9465	0.8387	0.9905	1.1596	1.1249	1.0646	0.9490	0.9501	1.1554	0.8323	1.1983	1.3259	1.1238	1.6688	1.2141	1.1229	1.3264	1.2951	1.4021	1.3791
1669	0.4642	0.4769	0.8499	0.8050	0.7328	0.8980	0.7829	0.5588	0.9958	0.9415	0.8583	0.8976	0.9060	0.9596	0.8542	0.9286	0.5642	0.8610	0.8515	0.9337	0.7689	0.8895	0.8224	0.8268	0.7411	0.9008	0.9943	1.3915	0.9209	1.0773	1.0248	1.3457	1.1969	0.8091	1.1817	1.1739	1.0671	1.0603	1.0661	1.2113	0.5932	0.8942	0.6450	0.8295	0.9336	0.6651	0.7244	0.6630	0.4458
1670	0.5160	0.5217	0.9878	0.8096	0.8194	0.8939	0.7146	0.6434	0.9798	0.9999	0.9422	0.8928	0.9017	0.9722	1.1420	0.8098	0.5244	1.0114	0.7143	1.0257	0.5644	0.4089	0.9425	1.1148	1.1374	1.1406	0.9402	1.2707	1.0846	1.0971	0.9864	0.9950	0.7465	0.8219	1.2362	0.9811	0.9258	1.0150	0.6695	0.7275	0.4211	0.7962	0.7274	0.8311	0.8667	0.4916	0.6084	0.8164	0.6036
1671	1.4153	1.5327	0.9965	0.7957	1.2176	0.8920	1.1993	1.2146	0.9819	1.1494	1.0613	0.9554	1.0343	1.0602	1.2001	1.0301	1.3722	1.1294	1.4105	0.9687	1.1040	1.1127	1.0401	1.0605	1.1038	1.0316	0.9409	1.0449	1.1114	1.0436	1.1969	1.1228	1.0375	0.9958	1.1103	1.1347	1.0533	1.0484	1.0393	0.9736	1.4634	1.1000	1.3244	0.9623	1.2640	1.2775	0.8152	1.8042	1.4383
1672	1.1651	1.2325	0.9848	1.1200	1.2874	1.0915	1.4298	1.6636	1.1552	1.1542	1.0806	1.0862	1.1260	1.0538	1.1239	1.0389	1.3514	0.9642	1.1521	1.0275	1.1588	1.1233	1.1367	1.0195	1.1147	1.0537	1.0337	0.8858	0.9719	1.1363	1.1653	0.9883	1.1598	1.0282	1.0235	1.4143	0.9704	1.0504	1.1111	1.3006	1.6032	1.1405	1.5535	1.4218	1.1388	1.3593	1.3381	1.3384	1.7806
1673	0.5396	0.7056	1.1156	0.8037	1.2268	1.4178	0.9747	0.9472	1.1452	1.0670	1.0230	1.0349	1.0272	1.0286	0.9639	0.9551	0.7633	0.9141	0.7569	1.0517	1.0431	0.8717	1.0926	0.9227	0.7893	0.9969	1.1653	1.1611	1.0409	0.9495	1.0483	1.3273	0.9753	1.1518	1.4428	0.8186	1.0260	1.1020	1.3294	1.0184	0.6584	0.7436	0.7122	1.0776	1.0305	0.8202	1.0003	0.6787	0.7414
1674	0.9916	1.0146	1.0140	1.1362	1.1820	1.4740	1.4421	1.1118	0.9172	0.9722	1.1178	0.9598	0.9684	0.9361	1.0507	1.0655	1.2214	0.9388	1.0808	0.9788	1.2158	1.2679	0.9224	1.0520	1.2556	1.1334	1.1319	1.0471	1.0885	1.0453	1.1782	1.1378	1.0008	1.0196	1.0605	1.1610	1.0219	1.1577	1.1453	1.0022	1.1561	0.9921	0.9759	1.1411	0.9840	1.3780	1.0295	0.9912	1.2598
1675	1.2337	1.1358	1.0333	1.2063	0.8665	1.4283	0.7428	0.8407	0.9924	1.0713	1.0851	0.9942	0.8635	1.0390	0.9569	1.0228	0.7960	0.8109	1.0341	1.0249	1.0071	0.7810	0.9395	1.1129	1.1626	1.1924	1.0905	1.2060	1.2711	0.9981	0.6202	1.0914	1.0516	1.0081	1.1003	0.9649	1.0852	1.0249	1.2083	1.0126	0.9961	0.8876	0.8499	0.9350	0.8130	1.1912	0.8113	1.0350	1.0778
1676	0.5087	0.6678	0.7120	0.6790	0.7994	0.4684	0.9953	0.6663	0.7795	0.7571	0.9768	0.8279	0.8910	0.8436	1.0040	0.9447	0.6826	0.8123	0.7597	0.9131	0.7300	0.8590	0.8860	1.0104	0.7541	0.9008	0.7420	0.9045	0.6338	0.8456	0.7855	0.7717	0.8874	0.8903	0.9017	0.6101	0.7276	0.7386	0.9103	0.9451	0.5298	1.0427	0.7091	0.9781	0.8604	0.5637	1.0896	0.7961	0.6042
1677	1.7124	1.4544	1.0630	0.8724	1.1012	1.4051	1.1086	0.8503	0.9290	0.9487	1.1656	0.7680	0.8099	0.8468	1.1397	0.8934	1.0681	1.0846	1.0586	1.0590	1.0688	1.0029	0.7149	1.0229	1.0698	0.9854	0.8088	0.8637	0.9033	0.9714	0.9362	0.9588	1.0429	0.9475	1.0485	0.9166	0.8551	0.9824	0.5830	0.9876	1.2768	0.9767	0.9796	0.8197	0.9466	1.3479	1.0743	1.4902	1.3858
1678	0.9777	1.0647	1.0845	0.9395	0.9226	0.9165	1.1802	1.1414	1.0741	1.0686	1.0219	1.0400	1.1437	1.0296	1.0631	0.8415	1.0131	0.9278	1.0946	1.0350	1.0786	1.0005	1.0394	1.0707	0.9603	1.0307	0.9402	1.2396	0.9505	0.9361	1.0214	0.8967	0.9120	0.8683	0.9309	0.9017	0.9275	1.1654	0.8076	1.0181	1.2188	0.9440	0.9959	1.0346	1.1405	1.1577	1.0007	0.7021	1.1657
1679	0.9370	0.8055	1.0040	1.3332	1.0043	1.1446	1.0408	1.0999	1.2978	1.3210	0.9988	1.2098	1.1099	1.2218	1.1124	1.0973	0.9276	1.0351	0.9275	0.9511	1.0591	0.8815	1.1784	0.9922	0.9402	1.0698	1.2126	0.8431	1.1151	1.1044	1.0999	1.0132	0.4621	0.9521	1.1807	0.8067	1.0299	1.1034	0.9691	0.7444	1.0499	0.9180	1.3312	0.9530	1.0697	0.9452	1.0178	0.9022	1.1141
1680	1.5986	1.0594	0.9302	1.5738	1.4147	1.4257	1.1743	1.2103	1.2314	1.2233	1.0361	1.1371	1.1237	1.0712	1.0214	0.9631	1.7377	1.1342	1.1779	0.9814	1.1935	1.1464	1.1761	0.9981	1.0155	0.9604	0.9620	1.0830	0.8679	0.8981	1.3590	0.9351	0.9874	0.9372	1.0174	0.9561	0.9199	0.8151	1.0387	1.0721	1.1915	1.0130	0.9917	1.0374	0.9259	1.4988	1.3146	1.1094	1.2428
1681	0.7597	0.9065	0.9523	0.6552	1.0690	1.1341	0.8428	1.0397	0.6327	0.7709	0.9652	0.7148	0.7738	0.7724	1.1040	1.0347	0.8705	0.8369	1.1163	1.0279	1.0385	0.9015	0.6308	1.5994	1.3419	1.4851	1.3289	1.4148	1.2013	1.0503	1.4842	1.2101	0.9953	1.0403	1.2259	1.0703	1.2321	1.2279	1.7476	1.3757	0.7331	1.2672	0.8918	1.1510	1.3541	0.7675	1.2229	1.1453	1.3389
1682	1.2400	1.2767	0.9765	1.5581	1.1325	1.3870	1.2917	1.3807	1.2927	1.3450	0.8964	1.2618	1.3155	1.1650	0.9681	1.1431	1.2611	1.0924	1.1879	0.9065	1.3378	1.2643	1.2666	0.9154	0.9223	0.8934	0.9958	0.9930	0.8731	1.0778	1.0937	0.9263	1.0576	1.1938	0.8418	1.0925	0.9518	0.8620	1.0088	1.3723	1.1457	1.1811	1.3012	1.3956	1.0822	1.3572	1.0703	1.2088	1.0405
1683	1.4267	1.2536	1.1312	1.1168	1.0845	1.2544	0.9342	0.7874	1.2723	1.2652	1.0544	1.0853	1.1526	1.0614	1.1064	1.0173	1.0787	1.0986	1.0292	1.1000	1.1131	0.8130	1.2366	0.9424	0.8653	1.0329	1.3536	0.7963	1.0360	0.8911	0.6989	0.8628	1.1034	1.2169	0.8057	1.1355	1.0824	0.8798	0.8302	1.1608	0.8522	0.9302	1.1719	0.9087	0.5886	1.2142	0.8584	1.3519	0.9182
1684	1.0949	1.0142	1.0171	0.7861	0.9043	0.8211	0.9623	1.0074	1.0592	1.0757	0.9955	1.0497	1.0387	1.0918	0.7632	1.0605	0.9177	1.0088	0.9576	1.0012	1.0083	1.0021	1.0373	0.9537	0.7791	0.8932	1.1178	0.8312	1.0995	1.0432	1.0559	1.1579	1.1803	1.1461	1.0855	1.4351	1.0809	1.0980	1.0477	0.9961	0.7603	0.9460	1.4486	0.9695	1.0582	0.8332	0.9613	0.9453	1.1840
1685	1.1815	1.0589	0.9417	0.7879	0.8045	0.6687	0.9942	0.9926	1.0558	1.0627	1.1019	1.0691	0.9992	1.0492	1.0392	1.0427	1.2028	1.0175	0.9258	0.9840	1.2297	1.1988	0.9937	0.9760	1.0015	1.0018	1.0708	1.0431	0.9899	1.1388	1.1266	1.1010	0.8411	0.9632	0.9329	0.9194	0.9691	0.9961	1.1894	0.9627	0.6309	0.8699	0.4948	1.0626	1.0234	1.1623	0.8720	1.0227	1.1634
1686	0.6971	0.7410	0.9615	0.7229	0.7917	0.7602	0.7442	0.7693	0.9076	0.8607	0.8926	0.9412	0.8997	0.9026	0.9415	0.8464	0.7003	0.9559	0.8345	0.9265	0.8066	0.7336	0.8514	1.0190	0.8661	0.9954	1.0727	0.8596	1.1231	0.9289	0.8230	0.7741	0.5577	0.8459	0.9901	0.4313	1.0207	1.0005	0.8786	0.5134	0.6453	0.8765	0.7172	0.9675	0.9085	0.7336	0.7607	0.9821	0.6567
1687	1.1324	1.0738	1.0653	1.6128	1.2467	1.0314	1.3260	1.1038	1.0185	0.9785	1.0949	0.9959	0.9715	0.9584	1.0480	1.0642	1.2521	1.0277	1.1124	1.0411	1.3208	1.2238	0.9596	1.1063	1.2268	0.9492	0.9820	0.9479	0.8967	1.0644	1.3032	1.1625	1.2028	1.0441	1.1371	1.4513	0.9591	1.0982	0.9264	0.9711	1.1532	0.8764	0.7976	1.1149	1.0044	1.1469	0.9927	0.9132	1.1441
1688	1.0102	1.0545	1.0751	0.8335	1.0013	1.0130	1.0120	0.8896	1.2172	1.2970	1.0450	1.1380	1.1662	1.0841	1.0289	1.1255	1.0205	1.0976	0.9952	1.0747	1.2113	0.7388	1.1369	0.9444	0.9730	0.9916	1.0753	0.9908	1.0341	1.0650	0.9872	1.1576	0.9190	0.9531	1.2485	0.9629	0.9759	1.0853	1.2712	0.9590	1.0630	0.9981	1.0025	0.8700	0.8254	0.8597	0.9258	1.1296	0.9306
1689	1.0506	0.8169	0.9461	0.9610	0.6739	0.8462	0.9799	0.9433	1.0504	1.0646	0.9232	1.0178	1.0202	1.0152	1.0260	0.8970	0.8475	1.1938	0.9835	0.9363	0.9604	0.8865	1.0429	0.9569	1.0464	1.0807	0.9169	1.0186	0.8247	0.9914	0.8784	1.0533	1.0705	1.0651	1.2835	1.0466	0.8948	0.8374	0.9408	0.9875	0.8392	0.9497	0.9014	1.0758	0.9022	0.8388	1.0574	1.2105	0.8907
1690	0.9097	1.0044	0.9837	0.5549	0.8706	0.9786	0.8708	0.8429	0.7914	0.7779	0.9129	0.7691	0.7755	0.8201	0.7767	0.9828	0.6926	0.7690	0.9499	1.0248	0.7513	0.8227	0.6854	0.6228	0.5472	0.7061	0.9206	0.8935	1.0010	1.0259	0.6815	1.0802	0.9588	0.8693	1.4120	0.8806	0.9490	0.9371	0.8441	0.9772	0.8648	0.8650	0.5802	0.7454	0.8343	0.8616	1.0207	1.0224	0.5655
1691	0.4343	0.4837	0.8756	0.8121	0.6700	1.0480	0.6833	0.6524	0.8905	0.9092	0.7464	0.8409	0.8334	0.8880	0.8119	0.4419	0.5686	0.9720	0.7374	0.9015	0.6481	0.9353	1.0097	1.0331	0.9625	0.9722	0.5773	1.1189	0.9067	0.8988	0.8526	0.9922	0.6086	0.9635	0.5050	0.8086	0.9913	0.7417	1.0551	1.0594	0.4904	0.6409	0.6387	0.8647	0.9465	0.7091	0.8068	0.4107	0.5566
1692	1.3167	1.3186	1.0222	0.8112	0.9611	0.8519	1.0329	0.8948	1.1065	1.1822	1.2131	1.0237	0.9788	1.0871	1.2223	1.2032	1.2304	1.1829	1.0487	1.0138	1.1805	0.9913	1.1109	1.0633	1.3203	1.0702	1.2422	1.2095	1.0040	0.9378	1.2493	1.0903	1.0864	1.0073	0.7227	0.6986	0.9981	1.0018	0.8894	0.8226	1.3767	1.0050	0.9282	0.9602	0.8506	1.1550	1.0554	1.4354	1.1467
1693	1.2323	1.2307	1.0116	1.1581	0.9123	1.1552	1.2212	1.1133	1.1098	1.0942	1.0626	1.0733	1.0870	1.0533	0.9602	1.0291	1.0287	0.9195	1.0486	0.9775	1.0939	0.9437	1.0733	1.1419	1.0637	1.1756	0.6506	0.8190	0.7824	1.0097	0.9857	0.9090	1.2266	1.0660	1.0576	1.3033	0.9275	0.8991	0.8480	1.2019	1.1291	1.1905	0.9728	0.9461	0.8474	1.2377	1.0833	1.3488	1.2503
1694	0.8931	0.9072	1.0729	1.0713	0.9486	1.1040	1.1394	1.4123	0.8800	1.0198	1.0746	0.9512	0.9372	0.9288	1.0593	0.9130	1.0161	1.1394	1.0147	1.0355	1.0481	1.0890	0.9601	1.0834	1.0031	1.0932	0.8572	0.9765	0.7751	1.1173	1.4486	1.0440	1.1499	1.1486	1.2155	1.2184	0.9226	1.0725	0.9654	1.1718	1.1815	1.1190	0.8178	1.2000	1.0299	1.2659	1.3748	1.0025	0.9726
1695	0.9505	1.1316	0.9680	1.1879	0.9925	0.9665	1.0556	0.9690	0.9792	0.9303	1.0025	0.9588	0.9324	0.9411	0.9311	1.0279	1.2341	1.0978	1.1058	0.9806	1.0017	1.0700	0.8785	0.9113	0.8868	0.8013	1.0388	1.0015	1.0539	0.9049	0.9262	0.9668	0.4615	0.6748	1.0086	0.4832	0.9908	0.9800	0.9998	0.6957	1.1346	1.0807	0.8375	0.8127	0.9893	1.1870	1.0654	1.0973	0.8202
1696	1.5689	1.3405	0.9481	0.9708	1.0000	1.1385	1.1158	1.1891	1.1556	1.0990	0.9667	1.0425	1.1990	1.0444	1.0016	1.1110	1.3155	0.9188	1.0954	0.9658	1.0470	1.1670	1.0503	1.0145	0.9599	1.1412	1.1283	0.9173	0.9259	0.7588	0.7978	0.9596	1.1906	1.0282	0.9993	0.9827	1.0540	1.0032	0.7204	0.9781	1.2168	1.3044	1.2705	1.0894	1.2519	1.2893	1.1432	0.9249	1.5470
1697	1.2293	1.2808	1.0386	1.2019	1.0347	1.2731	1.0567	1.1853	1.4146	1.4210	1.0974	1.2907	1.3837	1.2517	1.2146	1.2615	0.8840	0.9183	1.0455	1.0398	1.0207	0.9858	1.2687	1.1594	1.2183	1.1889	1.1690	1.2050	1.1797	1.1598	0.8268	1.1895	1.1068	1.1360	1.0777	1.1298	1.1659	1.1570	0.9669	1.1328	1.0880	1.0703	1.1223	1.2251	0.9156	1.0104	1.1050	0.9034	1.1978
1698	0.9290	0.7668	0.8898	1.1999	1.0919	1.2435	0.8928	0.8555	1.1428	1.0524	0.9823	1.1119	1.1743	1.0977	1.0339	1.1443	0.6601	0.9117	0.9366	0.9573	0.8313	0.9141	1.0642	0.9814	0.9137	0.9144	0.9592	1.1903	0.9071	1.0937	0.8458	0.9331	0.5561	0.7706	0.9272	0.6415	0.8902	0.8520	0.8591	0.7672	1.0569	0.8061	0.8853	0.9606	1.1056	0.7273	0.8719	1.0834	0.4441
1699	1.1572	1.2058	1.0190	0.9590	1.0242	1.3267	0.9886	1.0934	0.4554	0.6328	1.0210	0.5690	0.5258	0.6060	1.1023	1.1051	1.1687	1.0463	1.1990	0.9776	1.2571	1.4816	0.5820	1.2180	0.9060	0.9460	1.1661	1.1725	0.9680	0.9512	0.9195	1.1384	0.9624	0.9170	0.9228	1.2424	1.0880	1.3048	0.8724	0.9866	1.5146	1.0434	1.0004	0.9429	0.9439	1.3532	0.8996	1.0360	0.8807
1700	0.9041	0.9804	1.0360	0.7506	0.9685	1.1002	1.2608	1.5066	1.2181	1.2216	0.9455	1.2195	1.2753	1.1291	1.0340	1.1243	1.2949	0.9601	0.9700	0.8650	1.1651	1.1673	1.1742	0.9970	1.1910	1.0584	1.1147	1.1336	1.0254	1.0462	1.3063	1.1209	1.5431	1.3180	0.9029	1.3248	0.9858	1.0178	1.0066	1.4714	0.9429	1.1032	1.4021	1.2369	0.7508	0.9587	1.4459	0.7863	1.0372
1701	0.6854	0.7360	1.0335	0.7573	0.9742	0.9920	0.7747	0.6387	0.9771	0.9738	0.9640	0.9561	1.0665	0.9681	0.8473	0.8735	0.6786	1.0298	0.9449	1.0065	0.8089	0.9076	0.9644	0.9122	0.8016	0.8556	0.8321	0.8760	0.8223	0.8177	1.2387	0.8861	1.5053	1.3639	0.8015	1.1542	0.8548	0.7601	0.7724	1.6959	0.7586	1.0079	0.8505	0.8012	0.8000	0.9586	0.8666	0.9856	0.9328
1702	1.4136	1.2892	0.8614	1.8217	1.0656	1.1502	1.4459	1.2472	1.2633	1.2775	1.0595	1.2321	1.2260	1.1592	1.1898	0.9646	1.8422	0.9802	1.0159	0.9500	1.2106	1.2629	1.1690	1.0744	1.0241	1.0680	1.0966	1.2123	1.0179	1.2228	0.9661	1.4100	1.4221	1.1906	1.4855	1.0580	0.9821	1.2105	1.3104	1.0388	1.5266	1.1162	1.3179	1.4083	1.4993	1.1963	1.0516	1.1866	0.9360
1703	0.7349	0.7027	0.8535	0.9041	0.8444	0.9340	0.8674	0.8733	1.0074	0.9408	0.9234	0.9742	0.9453	0.9803	0.8290	0.8340	0.7744	0.6161	0.9720	0.8653	0.8676	0.7844	0.9592	0.8494	0.7892	0.8213	0.8037	0.8007	0.8612	0.8181	0.6129	0.7413	0.4642	0.6265	0.9385	0.5840	0.8579	0.6851	0.8069	0.5573	0.7977	0.5999	0.7774	0.8681	0.8630	0.8796	0.7666	0.8026	0.7150
1704	1.3131	1.2505	1.0134	0.9762	0.9947	1.0985	0.9678	1.4133	0.9937	0.9378	1.0754	0.9446	1.0646	0.9078	1.2573	0.9757	1.3787	1.0039	1.0567	0.9522	1.0892	0.9124	0.9332	1.2173	1.2600	1.2103	0.8606	1.0831	0.6769	0.8804	1.2866	0.9638	1.3563	1.1686	1.1351	1.4414	0.8656	0.7361	1.1287	1.2629	1.4147	1.2292	1.4119	1.1561	1.3046	1.2243	1.0325	1.3145	1.3013
1705	0.9362	1.1199	1.1285	1.0637	1.1872	1.1592	0.9501	0.9443	1.0247	0.9235	1.1040	0.9646	0.9424	0.9409	1.3445	1.1124	0.8295	1.0977	1.0683	1.0891	1.1049	1.1056	0.8996	1.2437	1.1589	0.9909	1.1460	1.5066	1.1807	1.0662	1.1689	1.2095	0.7216	0.9118	1.1610	1.0642	1.1404	1.0788	1.1148	1.1049	0.9849	1.0429	1.0555	0.9126	0.7344	1.0791	0.9272	1.0402	0.9643
1706	0.5160	0.4980	0.9311	1.2107	0.8934	0.9029	0.7347	0.7156	1.0654	1.0487	0.7595	1.0360	1.1419	0.9286	0.9010	0.8732	0.8882	0.9120	0.9045	1.0054	0.6229	0.9715	1.0422	0.9670	0.9170	0.9210	0.8902	0.9312	0.9917	0.8607	0.9118	1.0849	0.6666	0.8839	1.1602	0.6830	0.8686	0.7797	0.9104	0.8597	0.4905	0.8443	0.9114	1.0488	0.9727	0.6574	1.1404	0.8308	0.6380
1707	0.6713	0.8182	0.9781	0.8392	0.7313	0.8309	0.8391	1.2446	0.8708	0.9042	0.9258	0.9026	0.7475	0.9095	0.7681	0.9992	0.6539	0.7085	0.9494	1.0071	0.7229	0.7476	0.8034	0.5794	0.6466	0.7458	1.1104	0.5914	0.9064	1.1109	0.8680	1.0182	1.2500	1.2015	1.0385	1.2158	0.9335	1.0030	1.1349	1.1010	0.8179	1.1215	1.4905	1.0941	1.0677	0.8000	1.0494	0.9630	1.0421
1708	0.8610	0.9675	1.0328	0.8183	0.6854	0.7229	0.8191	0.8374	0.9516	1.0317	1.0650	0.9674	0.8115	0.9299	0.9568	1.0968	0.8253	1.1191	0.9025	1.0732	0.9651	0.9234	0.8805	0.9610	0.9104	1.0596	1.0848	0.9824	1.0320	1.0787	0.8369	1.0583	0.7365	0.9337	0.8484	0.5719	1.0028	0.9605	1.0357	0.4971	0.9393	0.9618	0.7546	0.8595	0.9612	0.8019	0.9575	0.7183	0.8604
1709	1.2961	1.3823	1.0850	1.1403	1.0478	0.8650	1.0516	0.9452	1.3290	1.2344	1.1408	1.2407	1.2401	1.1795	1.1116	0.9667	1.1442	1.0609	1.1311	1.1002	1.1232	1.0994	1.2546	0.9398	1.0569	1.0344	1.1071	0.9804	1.0342	1.1520	0.8195	0.9757	1.2288	1.2056	0.8532	1.1051	0.9609	0.9770	0.8807	1.2207	1.2102	0.8140	1.0350	1.0460	0.8787	1.1884	0.9170	0.8803	1.4753
1710	0.7150	0.8432	0.9893	0.8342	1.0812	1.0609	0.9255	0.6952	0.8356	0.8401	1.0003	0.8556	0.9087	0.8473	0.7071	0.9908	0.7706	0.9271	0.9316	0.9958	0.9247	0.8581	0.7936	0.8418	0.8280	0.7604	0.8878	0.9410	0.9194	0.8684	0.9396	0.9456	1.0710	0.7187	0.9958	1.2537	0.9764	1.0761	1.1415	0.9268	0.8929	0.9048	0.5342	0.7289	0.9329	0.8510	0.7910	0.7880	0.5797
1711	1.3303	1.1158	0.9229	1.2416	1.1293	0.8990	1.0360	1.1427	1.0435	1.1454	0.9462	1.0187	1.0131	1.0320	1.0859	1.1125	1.3396	0.9947	1.2279	1.0365	0.8513	0.8082	1.0445	0.9565	1.0635	0.8887	0.8494	0.7536	0.8525	0.8070	0.8368	1.0536	0.9392	1.0460	1.1724	0.6627	0.9604	0.8698	0.5120	0.9000	1.2180	1.0936	1.1295	0.9575	1.0804	1.4280	1.0168	1.2262	1.1679
1712	1.0625	1.2566	0.9963	1.1657	0.9582	0.9952	1.1764	1.2631	1.0703	1.0384	1.0086	1.0730	1.0414	1.0324	0.9377	1.0475	0.9788	1.0183	0.8890	0.9327	0.9557	0.9213	1.0206	0.8939	0.9253	0.8780	0.9630	0.9238	0.9612	0.9723	0.9785	1.0749	1.0067	0.9750	1.2054	0.9407	0.9003	1.0203	0.8101	0.9561	0.9015	0.9781	0.9950	1.0483	0.8807	0.9295	1.0851	1.0950	1.1912
1713	0.9603	1.0550	1.0570	1.4758	1.1122	1.0304	0.8911	0.9921	1.0103	0.9684	1.0728	1.0084	1.0753	0.9666	0.9609	0.9983	0.4990	0.8416	0.7855	1.0302	0.8225	0.9563	0.9886	0.9454	0.8218	0.9660	1.0454	0.9383	1.0517	1.0776	1.1093	1.1070	1.3497	1.2650	0.9232	1.5757	0.9860	1.1222	0.8191	1.1421	0.7946	1.0923	1.0681	0.8576	0.8723	0.9280	0.9947	1.1983	1.0511
1714	0.7607	0.6897	0.9465	0.6890	0.9526	0.9984	0.8012	1.0454	0.9792	0.8998	0.9386	0.9611	0.9225	0.9738	0.7833	0.9840	1.0821	0.8031	1.0476	0.9400	1.1826	1.2115	1.0012	0.8509	0.8456	0.9277	1.0806	0.8993	0.9692	0.9088	0.8466	0.8399	0.6282	0.7845	1.0406	0.4290	0.9834	0.9777	0.8805	0.7270	0.7357	1.0622	1.0983	1.1058	0.8922	1.1104	1.0088	1.2225	0.7886
1715	0.9289	0.8896	0.9910	1.0608	0.8669	0.8552	0.8863	1.0235	0.7830	0.8492	0.9662	0.8737	0.7907	0.8084	0.8387	1.0010	1.1455	0.9328	1.1227	0.9862	1.0090	0.9725	0.8871	0.7526	0.8080	0.8579	1.0895	0.9503	0.9734	1.2271	1.0444	1.2172	1.0378	1.2013	1.3668	1.2812	0.9748	1.1439	1.0286	1.1822	0.8617	1.0175	1.1907	0.8836	1.1103	0.9013	0.9385	0.8952	0.8570
1716	0.7865	0.9654	1.0693	0.9430	0.8934	0.7628	1.0172	1.1731	1.0671	1.0744	1.0757	1.0176	1.0320	1.0133	0.9976	1.1167	0.7046	0.5968	0.8177	1.0521	0.9138	1.0192	0.9294	0.9423	0.8791	1.0115	1.1967	0.9621	1.0827	1.1913	0.8993	1.1151	1.3151	1.0705	1.2522	1.2267	1.0630	1.1724	0.9969	0.9585	0.9759	1.0185	1.2260	1.1303	1.0824	0.8624	1.1561	0.9592	1.0320
1717	1.3205	1.3837	1.1659	1.1109	0.9634	1.2412	1.0115	0.9090	1.3048	1.1902	1.1036	1.1509	1.3735	1.2075	1.1077	0.9770	1.1074	1.2604	1.0590	1.1015	0.9796	0.8120	1.2282	1.2438	1.0769	1.1441	1.0007	0.9899	1.0982	1.1011	0.6707	0.7419	0.6731	0.7591	0.9443	0.6295	1.0715	0.8869	0.7207	0.6311	1.2136	0.8456	1.0780	0.8521	0.8350	1.0405	0.7721	1.1808	1.0281
1718	0.9550	0.9748	0.8440	1.5658	1.4538	1.2076	1.1563	1.0363	1.2192	1.1478	0.9111	1.1520	1.1576	1.1673	0.9670	0.8233	1.3136	1.1516	1.1177	0.8451	0.9996	0.9976	1.1807	0.9839	0.7935	0.9917	0.7534	0.9501	0.7480	0.8647	1.0455	0.8910	0.9864	1.0263	0.8634	0.7756	0.8316	0.6879	0.9372	1.0775	1.0922	1.0572	1.0423	0.9334	1.0119	1.0587	0.7965	1.0625	0.9414
1719	0.7992	1.1314	0.9421	0.9532	0.8707	1.1429	0.8783	0.9868	0.9056	0.8666	0.9556	0.9684	0.9704	0.9972	0.9223	0.9420	1.2562	1.0677	1.2576	0.9536	1.0329	1.0183	0.8601	0.9633	0.9543	0.9201	1.0862	1.0609	0.9632	0.7116	0.8732	0.9004	0.9576	1.1283	0.8698	0.8754	1.0175	0.8409	1.2022	1.1385	0.9457	0.9849	1.1624	0.9367	0.9124	1.0153	0.8363	0.9746	0.6339
1720	1.2788	1.2065	1.0405	1.3195	1.0229	0.9916	1.1223	1.1372	1.1128	1.1760	1.0603	1.1462	1.0975	1.1207	1.0639	1.0714	1.1463	1.1566	1.0201	0.9727	1.0800	0.9279	0.9954	0.9994	1.0046	0.9740	1.1151	1.0112	1.2036	1.0723	0.9082	0.9574	0.8123	0.8033	1.0474	1.0334	1.0628	0.9674	1.0580	0.9561	1.2251	0.9898	0.8975	1.0776	0.9532	1.0661	0.9730	0.9678	1.0338
1721	0.4810	0.6278	0.9405	0.5798	0.7264	0.6344	0.5804	0.5863	1.0860	0.9416	0.8766	1.1064	1.1692	1.0445	0.9222	1.1229	0.6146	0.9342	0.9702	0.8618	0.8822	0.9692	0.9578	0.8960	1.0062	0.9026	0.8750	1.2380	1.0114	0.7881	0.8862	0.5006	0.5463	0.7460	0.7088	0.5655	1.0154	0.8758	1.1274	0.9608	0.7294	0.8821	1.0293	0.8005	1.2554	0.6145	0.9192	0.5494	0.5000
1722	0.7287	0.8548	0.9906	0.6227	0.8474	0.7326	0.9520	0.8809	0.9697	0.9979	0.9149	0.9727	0.9994	1.0245	0.9379	0.8825	0.7561	0.9208	1.1427	0.9513	1.0942	1.2016	0.9491	0.9175	1.0970	1.0650	0.9562	1.0439	0.9175	0.8034	1.1988	1.0032	1.0149	1.0750	0.8965	1.1807	0.8903	0.9697	1.3223	1.0084	1.0545	1.0161	0.8751	0.9777	1.0290	0.8077	0.9179	0.8456	0.8857
1723	1.7776	1.4166	1.0922	1.6060	1.3104	1.2275	1.1882	1.1779	1.0233	1.0212	1.0941	1.0078	1.0556	1.0087	0.9769	1.0683	1.6347	0.9540	1.0295	1.1283	1.1804	1.0949	0.9830	1.0426	1.0569	0.8701	1.0302	0.9753	1.0228	1.0808	0.8077	1.1960	0.8594	0.8396	1.2544	0.8132	1.0645	1.0488	1.3159	0.6656	1.3527	1.1041	1.2933	1.0502	1.0713	1.2768	1.0254	1.1083	1.6165
1724	0.9919	1.0130	1.0103	1.1829	0.9181	0.9158	0.9337	1.2276	1.2085	0.9993	1.0128	1.1210	1.2570	1.1247	0.7499	1.0759	0.7454	1.1151	0.8562	1.0005	0.9095	0.8718	1.1322	1.0546	1.0176	0.9018	1.0247	1.1428	1.2147	1.0414	0.9035	0.9163	0.8983	1.0141	0.9231	0.9519	1.1088	0.9270	0.7302	1.0346	0.8567	1.0756	1.2119	0.8738	0.9794	0.7179	1.0407	0.7017	0.9271
1725	1.1328	1.1875	1.0077	0.9747	0.9553	1.1900	1.2895	1.0482	1.1529	1.2043	1.0912	1.2060	1.2572	1.1151	1.2050	1.1008	1.0524	1.1343	0.8689	1.0898	0.9646	1.0821	1.2002	1.0815	1.3193	1.1316	0.9636	0.8286	1.1710	0.9819	0.9391	1.0038	1.1093	0.9521	1.1085	1.1924	1.1979	1.1049	0.7608	1.1114	1.2028	1.1427	1.2876	1.0229	1.2719	1.1752	1.0522	0.6779	1.3705
1726	0.6805	0.7344	1.0753	0.8614	1.0425	0.6867	1.2841	0.9890	0.9983	1.0508	1.0184	1.1162	1.2745	1.0731	1.1421	1.1730	1.2398	1.1993	1.0338	1.1165	1.1101	1.2673	1.0792	1.2012	1.2854	1.0167	1.1809	1.2289	1.0489	1.0831	1.2395	1.0473	1.0169	1.1725	1.2536	1.1580	1.0909	1.2456	1.2774	1.0139	0.7336	0.8732	0.6110	0.8986	0.8467	0.8409	0.8230	0.8841	0.5175
1727	1.3275	1.1801	1.0714	1.7834	1.0526	1.0800	1.0785	1.1778	1.1573	1.1141	0.9681	1.0688	1.2566	1.0868	0.9872	1.0492	0.7514	0.9450	1.1627	1.0419	1.0988	0.9493	1.0170	1.1152	1.1430	1.1239	1.0635	0.8215	1.0119	1.0512	1.3271	1.1665	1.4109	1.2117	1.2480	1.2432	0.9612	1.0023	1.0351	1.5265	1.2844	1.2031	1.2774	1.2292	1.3172	0.8883	1.2132	1.4927	1.4771
1728	0.6151	0.6748	1.0549	0.7826	0.9160	0.9336	0.8040	0.7436	0.9518	0.9276	0.9684	0.9917	1.0415	1.0067	0.9661	0.9729	0.5583	0.9558	0.9140	1.0095	0.7446	1.0493	1.0129	0.9039	0.7828	0.8874	0.9866	0.7784	0.9814	1.1558	0.7616	0.9006	0.9110	0.9837	0.8308	0.7968	0.9550	0.8538	0.7324	0.8609	0.7834	0.8568	0.7541	0.8764	0.7027	0.6228	0.7094	0.5831	0.9004
1729	0.6973	0.8367	0.6582	0.4254	0.6207	0.5185	0.6347	0.6320	0.6312	0.6114	0.6202	0.6272	0.5901	0.7172	0.7237	0.3698	0.6778	0.7914	0.8107	0.7643	0.8719	0.7096	0.6900	0.8728	0.8648	0.9029	0.3838	0.7572	0.7654	0.7656	0.8054	0.8083	0.4074	0.7250	0.6665	0.3687	0.7810	0.5786	0.9670	0.3444	0.7421	0.9149	0.5427	0.6763	0.8110	0.8993	0.7518	0.9836	0.6023
1730	2.0193	1.4254	1.2306	1.7299	1.5413	1.2365	1.3069	1.0362	1.1013	1.0812	1.1904	1.1690	1.0754	1.1109	1.2308	1.0527	1.0955	0.9607	1.2004	1.2077	1.0383	1.1070	1.1589	0.9853	1.3256	1.1961	0.9717	0.9256	1.1269	1.0406	0.9632	1.0178	1.4035	1.1622	1.0960	1.2063	0.9672	1.1050	1.1470	1.2971	1.4520	0.9621	0.8230	1.1462	1.2131	1.4484	1.0965	2.1357	2.0447
1731	1.3155	1.0460	1.0756	1.2404	0.9934	1.0679	1.0306	0.9940	0.8446	0.9356	1.1278	0.9320	0.9124	0.9538	0.9791	1.1000	0.9528	1.1260	1.1760	1.0877	1.1718	0.8817	0.8528	0.9547	0.6433	0.9152	1.0261	1.0998	1.0948	1.1072	0.9376	1.0834	0.8902	0.8625	1.1724	0.7899	1.0600	0.9369	1.1281	0.5785	1.0989	1.0967	0.9695	1.0148	0.9131	1.0998	1.1069	1.0080	1.3988
1732	1.1912	1.1788	0.9802	1.3079	1.1290	1.0030	0.9807	1.1476	1.2690	1.1487	1.0510	1.2769	1.3697	1.2262	0.9052	1.1067	1.6942	1.2598	1.2790	0.9175	1.0974	0.9568	1.2836	1.0883	1.1760	1.0377	0.9622	1.0221	1.0429	1.1442	1.4129	1.1744	1.0195	1.2479	1.1801	1.1256	1.0182	1.1153	1.1514	1.4179	1.3439	1.0297	1.1316	0.9943	0.9433	1.1666	0.8370	1.1849	1.2788
1733	0.5649	0.6542	0.9833	0.5289	0.8184	0.7252	0.6949	0.6454	0.8162	0.8157	0.9886	0.9164	0.9204	0.8920	0.8994	1.0405	0.7968	0.8973	0.7770	0.9615	0.8114	0.7681	0.8029	0.8377	0.7932	0.9012	0.9859	0.9428	1.0376	0.9264	0.6186	0.7487	0.8335	1.1091	0.9305	0.8748	1.0579	1.0350	1.0656	0.9619	0.7528	0.6287	0.4988	0.7587	0.6189	0.7401	0.6570	0.7427	0.4063
1734	1.3162	1.5196	1.0234	1.2062	0.9123	0.9728	1.0614	0.9758	1.0114	1.1418	1.0456	1.0961	1.1641	1.1188	1.3221	0.9801	1.2081	0.9459	1.1642	1.0412	1.0615	1.1201	1.1041	1.2104	1.4492	1.2802	0.9432	0.9174	0.7803	0.8731	1.2948	0.9014	1.3207	1.0322	1.0446	1.1220	0.9037	0.9438	0.7977	1.1576	1.2166	1.1995	1.2434	1.0489	1.0532	1.2493	1.1249	1.1917	1.3849
1735	0.8229	1.0244	0.9833	0.5192	0.9204	0.6806	0.9202	0.7495	0.5198	0.6625	0.9931	0.7314	0.6806	0.7154	0.9254	0.8495	0.3957	0.6677	0.7307	1.0597	0.7257	0.9279	0.6182	1.0047	0.7187	1.0250	0.8790	1.0119	0.7287	1.1314	0.8507	1.1010	0.7006	0.6691	1.1050	0.4822	0.7960	0.9669	1.0119	0.4605	0.7945	0.9028	0.8728	0.7446	0.7959	0.6713	0.9516	0.8482	0.8872
1736	0.6851	0.6882	0.9281	0.7375	0.7209	0.9273	0.6160	0.6387	0.9564	0.9292	0.8860	0.9531	0.9699	1.0129	1.1171	0.9651	0.8308	1.0119	0.9522	0.9684	0.9394	1.0988	1.0271	1.0390	1.1340	1.0147	0.9754	0.8665	1.0248	0.9855	1.0637	0.8887	0.7099	0.8581	0.8290	0.9045	1.0041	0.9878	1.1099	0.9695	0.6509	0.9852	0.7678	0.8767	1.0379	0.6545	0.8896	1.0308	0.7435
1737	0.6591	0.6163	1.1193	0.8531	1.1839	1.0996	1.1844	0.6723	0.9685	0.9215	0.9796	0.9423	0.9397	0.9940	0.9302	0.9014	0.8048	1.0147	0.8833	1.1289	0.7155	0.7951	0.9630	1.1682	1.2700	1.2351	1.0002	0.9589	1.0198	1.1511	1.2563	1.1473	0.8314	0.8759	1.1490	1.2287	0.9930	0.9215	1.3107	0.9723	0.6919	1.0130	1.1906	0.8135	1.0389	0.7757	0.8393	0.9728	0.5186
1738	1.2693	1.2765	1.1181	1.4783	1.0192	0.9084	1.2055	1.3176	1.0417	1.0538	1.0609	1.0803	1.0469	1.0282	0.8573	1.1720	1.3667	1.1646	1.2364	1.1224	1.2615	1.0770	0.9898	1.0551	0.9536	0.9661	1.0611	0.9829	1.1693	1.1161	1.4702	1.1507	1.2050	0.9951	1.2501	0.8171	1.1543	1.0274	1.3817	1.1165	1.5523	1.1056	1.4472	1.0141	1.2730	1.2483	1.3663	1.1627	1.4302
1739	0.8385	1.0034	0.8390	1.0792	1.1876	1.1358	1.4856	1.4701	0.9168	0.9825	0.7613	0.9575	1.0047	0.9567	0.8720	0.7701	0.8371	0.7477	0.8579	0.9024	0.5604	0.7604	0.9218	0.8525	0.6926	0.8813	0.9999	1.0126	0.9075	0.6793	0.6697	0.6084	0.9165	0.9186	0.7892	1.1803	0.9550	0.9063	0.7851	0.8916	0.9443	1.1779	1.7380	1.4838	1.1360	1.0130	1.3451	1.3333	1.4249
1740	1.3290	1.3435	1.0062	1.0032	1.3054	1.2617	1.3233	1.2635	1.0013	1.1088	1.0437	0.9539	1.0301	0.9717	1.3208	1.0303	1.8208	1.1207	1.3869	0.9971	1.0800	1.0664	1.0405	1.0249	1.1448	1.1170	1.0478	0.9521	0.9642	0.9361	0.9447	0.8136	1.1529	1.0961	0.8081	1.2308	1.0082	0.9722	0.6885	1.2369	1.2328	1.1389	0.7572	1.2537	1.2212	1.4262	1.5372	1.4024	1.3876
1741	1.3437	1.1721	1.0158	0.8814	1.1784	1.2465	1.0389	0.8079	1.3469	1.3000	1.0487	1.3127	1.4557	1.3384	1.1984	1.0885	1.2543	1.2062	1.0699	1.0497	1.0632	0.9789	1.3385	0.9864	1.2690	1.1357	0.8769	1.1865	0.9328	1.0747	0.8104	0.6632	0.7802	0.9610	0.7175	0.8671	0.9273	0.8449	0.7155	0.7545	1.1777	0.9139	1.0167	0.7354	0.8332	1.0514	0.6562	0.9153	0.9052
1742	1.3054	1.1719	1.0320	1.7610	0.8808	1.0177	1.1381	1.2091	0.9323	0.9445	1.0448	1.0277	0.9753	0.9727	0.9857	1.0818	1.1943	0.6818	1.0390	0.9930	0.8558	1.1284	0.9511	1.0221	0.9569	0.9321	1.1021	1.0252	0.8962	1.1017	1.0888	1.0918	0.8412	1.2674	1.0705	1.0779	1.0268	1.0966	1.0020	0.9661	1.1878	1.0999	1.2754	1.2329	0.9154	0.7923	1.0936	1.1978	1.0991
1743	1.2166	1.2199	0.9337	1.0021	0.9801	0.9690	1.2369	1.2435	1.1153	1.1274	1.0470	1.1204	1.2011	1.1242	1.1179	1.0698	1.5543	1.2445	1.1309	0.9640	1.0548	0.8803	1.1822	1.1138	0.8538	1.0618	1.1713	1.0476	1.0279	1.1015	1.1351	1.1567	1.1130	1.4127	1.0338	1.2908	0.9601	1.0480	1.0736	0.9767	1.2634	1.0723	0.6799	1.0345	0.8631	0.9748	1.0457	1.1031	1.0508
1744	1.1734	1.0968	0.9990	1.2691	0.7080	0.9269	0.9726	0.9717	1.0095	0.9731	1.0256	1.0588	0.9105	1.0269	0.9046	1.1084	0.9915	1.0529	1.0757	1.0270	1.0356	0.8030	0.9961	0.8204	0.6889	0.7835	1.1332	1.0712	1.0406	0.9982	0.9487	1.1140	1.1017	0.8906	1.1143	1.1327	0.9820	0.9660	1.1320	0.8316	1.1390	1.0876	0.8419	1.0726	1.0642	1.0632	1.1498	0.9177	1.1808
1745	1.3323	1.4225	1.0303	1.2777	1.5722	1.5456	1.3232	1.1274	1.1934	1.2146	1.0839	1.2303	1.2064	1.2224	1.4777	1.2321	1.3655	1.0965	1.2005	1.0486	1.2373	1.0853	1.1348	1.1673	1.3234	1.2749	1.3083	1.1843	1.3853	1.1493	1.1641	1.3430	1.4879	1.2614	1.3641	1.4742	1.0350	1.1541	1.2663	1.2296	1.2584	1.0924	1.0677	1.1428	0.9303	1.3079	0.8735	0.8731	1.1299
1746	1.0662	1.0405	0.9596	1.3627	0.7339	0.8691	1.1070	1.4880	1.0659	1.0047	0.9820	1.0915	1.1002	1.0960	0.8438	1.1510	1.2421	1.0876	1.0816	0.9411	1.2496	1.2919	1.0884	0.8358	0.7753	0.8353	0.9114	0.7953	0.9451	0.9918	1.2095	1.2174	1.3194	1.1034	1.0431	1.2964	0.8775	1.0330	1.0519	1.1922	1.2910	1.0490	1.1642	1.1161	1.1544	1.2776	1.2855	1.0234	0.9732
1747	1.3147	1.2749	0.9919	1.0731	0.8753	1.1944	1.2489	0.9904	1.2769	1.2324	1.0601	1.2213	1.4276	1.2522	1.0919	1.1297	1.1410	1.3193	0.9446	0.9975	1.1964	1.0926	1.2720	1.0091	0.9637	1.0332	1.0921	0.8945	1.1494	1.0361	1.2726	1.2074	1.1782	1.2612	1.1633	0.9986	1.0117	1.0991	1.1102	1.0955	1.2742	1.0442	0.9908	1.0347	0.9162	0.9597	0.9570	1.0722	1.0761
1748	0.7801	0.5942	0.8998	0.8239	0.9549	0.9289	0.7867	0.7679	0.7894	0.7694	0.8732	0.8131	0.7511	0.8206	0.8139	0.7634	0.7837	0.8863	0.8774	0.9751	0.6360	0.7981	0.8366	0.9251	0.7791	1.0626	0.7928	0.9093	0.8792	0.6735	0.8373	0.6355	1.0148	1.1804	0.6569	0.8712	0.8648	0.6663	0.6146	1.1924	0.7634	0.8434	0.8141	0.8384	0.9413	0.6308	0.7707	0.8844	0.6119
1749	0.9289	1.1205	1.0435	0.7490	0.8155	0.9713	0.9046	1.0762	0.8233	0.8725	0.9836	0.8626	0.8141	0.8467	1.0765	1.0454	1.3713	0.9486	1.0488	0.9751	1.0839	1.1536	0.8998	1.1175	1.2990	0.9988	1.1927	1.1651	1.1296	1.0803	1.3350	1.0843	1.0004	0.9692	1.1197	1.2240	1.0643	1.1212	1.3931	1.1639	0.7535	0.9874	0.8804	0.9630	1.0778	0.9413	0.9767	1.0081	0.9655
1750	1.0352	1.2284	0.9279	0.7217	0.8775	0.7925	1.0557	1.3524	0.9743	0.9414	0.9836	1.0281	1.0203	0.9806	0.8973	1.0321	0.9497	1.0636	1.0126	0.9811	1.1249	1.1389	0.9409	0.9327	0.8372	0.8567	0.9908	1.1585	1.0265	0.8794	0.7700	0.8821	1.2251	1.1302	0.9326	1.1203	1.0158	0.9539	1.1423	1.3044	0.9988	0.9862	1.2628	0.9742	1.3964	1.2129	1.0742	0.9286	0.9353
1751	0.8521	1.0308	1.0264	0.6901	0.8308	0.6731	0.9796	0.8711	1.1565	1.0328	1.0002	1.1406	1.2274	1.1370	1.0621	1.0235	0.7812	1.1233	0.8589	1.0136	0.9863	1.2103	1.2244	1.0331	0.8848	0.9484	0.9824	0.8912	0.9075	0.9364	1.1717	0.9271	0.7169	1.0363	0.9554	0.7667	1.0119	1.0232	0.9113	0.9322	0.9523	0.8789	0.9214	1.0562	1.0892	0.7533	0.9900	0.9318	0.8779
1752	0.8781	0.9538	1.0799	1.0025	0.9820	0.9557	0.9048	0.9297	0.9887	0.9355	1.0519	0.9606	0.9450	0.9185	1.0265	0.9891	0.8701	0.6860	0.8360	1.0260	0.7114	0.6269	0.8840	0.9600	0.8618	1.0669	0.9666	0.7382	0.8682	1.0642	0.8967	1.1501	1.0657	1.0136	1.1724	0.9627	0.9277	0.9305	0.9177	1.1423	0.9756	1.0290	1.1552	1.0255	0.9009	0.6359	1.0660	0.9008	1.2627
1753	0.9067	1.0134	1.0651	0.8987	1.0311	1.1518	1.1569	1.1997	0.6908	0.7211	0.9555	0.6750	0.6731	0.7191	0.8959	1.0454	1.0771	0.8146	0.9435	1.0538	1.0409	1.3352	0.6934	0.8850	1.0174	1.0031	1.0481	0.9346	1.1218	0.8959	1.0287	1.0544	1.0685	0.8803	0.9691	0.8552	0.9827	0.9657	1.0598	0.5185	0.9333	1.0838	0.9722	1.1486	1.1229	0.9187	1.2344	1.1362	1.2167
1754	0.6769	0.6561	1.0231	0.9129	0.8896	0.9416	0.7609	0.7726	1.2478	1.1251	0.9488	1.1603	1.1558	1.1387	0.9011	1.0552	0.5000	1.1136	0.7998	0.8949	0.5487	0.5091	1.2111	0.8583	0.9871	0.8790	0.9767	0.8306	0.7834	1.0149	0.9571	0.9392	1.1324	1.0643	0.7421	1.0435	0.9615	0.9585	0.7687	1.1625	0.6069	1.0156	0.8611	0.8895	0.7918	0.6425	0.8747	0.8437	1.0313
1755	0.8426	0.8222	0.9344	0.7250	1.0471	0.9314	0.7954	0.6885	0.9587	0.8448	0.8402	0.8854	0.9367	0.9667	0.8941	1.1148	1.0083	1.0169	0.8913	0.9500	1.0344	0.9623	0.8574	1.0260	0.9238	0.8648	1.1635	1.2296	1.3422	1.1007	1.1970	1.1978	0.7398	0.8645	1.2341	1.0358	1.2236	1.1979	1.2908	1.1230	0.9254	0.9699	0.9601	0.9726	1.1119	0.8878	0.8789	1.0124	0.7699
1756	0.7504	0.8268	0.8882	0.8478	0.9108	0.8362	0.8309	0.8080	0.9506	0.8874	0.8122	0.9122	0.8948	0.8512	0.9419	0.8088	1.0764	1.1050	1.0455	0.8979	0.9383	0.9377	0.8915	0.9194	0.7520	0.9521	0.8506	0.8096	0.8604	0.7675	0.7484	0.7209	0.6971	0.9351	0.6263	0.6001	0.9469	0.7383	0.6182	0.7953	0.8886	0.6763	0.6733	0.8580	0.8675	1.2538	0.8146	0.7468	0.5928
1757	0.6319	0.8846	1.0351	0.6818	0.7938	0.7182	0.7617	0.7767	1.1854	1.0766	0.9056	1.0766	1.1882	1.0522	1.0094	0.8833	0.6426	0.9267	0.8369	1.0283	0.9681	1.1026	1.3093	0.8262	0.8166	0.9605	0.7906	0.7999	0.7509	0.9057	0.8973	0.8464	0.9257	0.9175	0.6323	0.8366	0.7917	0.8595	0.6659	0.7732	0.7969	0.8929	1.1063	0.9337	0.9421	0.6471	0.9346	0.6323	0.7505
1758	1.0035	1.1199	1.1630	0.8812	1.0178	0.9986	1.0784	0.8610	1.1942	1.1571	1.1083	1.1855	1.1448	1.0799	1.0586	1.0489	1.1077	1.0310	1.1142	1.1212	1.0151	1.0721	1.1722	1.1975	1.1217	1.0616	0.9672	1.0806	1.0881	0.8748	1.2901	1.0406	1.0656	0.9026	1.0325	1.0113	1.0332	1.0147	1.0915	1.0437	1.1545	0.9432	1.2712	1.1541	1.2357	1.2063	1.0777	1.1142	1.1595
1759	0.8368	0.6620	0.9886	0.6794	0.8945	0.9329	0.8829	1.1248	0.9346	0.8779	1.0176	0.8673	0.9669	0.9795	0.8899	0.8473	0.6812	0.9102	1.0227	0.9803	1.0096	1.0260	0.9038	1.3269	1.2390	1.3595	0.9597	1.0323	1.0050	1.0929	1.1768	1.2233	0.6811	0.8421	0.9142	0.8808	0.9783	0.9382	0.9855	0.9497	0.9598	1.1352	1.3578	1.0972	1.3988	1.4486	1.2016	0.9873	1.1599
1760	0.8824	0.9711	1.0038	0.7501	1.1570	0.9055	1.2633	1.0245	1.1215	1.1261	1.0417	1.2466	1.1559	1.1362	1.1710	1.0831	0.9129	1.1724	1.1598	1.0129	0.9595	0.9333	1.2485	1.0805	1.3575	1.2130	0.9687	0.9632	1.0592	0.9947	1.2795	1.0238	0.9226	1.0166	1.0334	1.2352	0.9505	1.0846	1.0213	0.8555	1.0575	0.9237	1.2600	0.9721	1.1172	1.1984	1.0664	1.1111	0.6567
1761	0.7886	0.8748	1.1201	1.0233	1.1507	1.2614	1.0999	0.9730	0.9210	0.9575	1.0892	1.0485	1.1173	1.0054	1.0374	1.0262	0.7939	0.7657	0.9316	1.0721	1.0089	1.1765	1.0100	1.0635	1.0268	1.0210	1.1896	1.1157	1.0642	1.1407	1.2100	1.1748	1.3872	1.2866	1.1386	1.1485	1.0687	1.2525	1.3049	1.1938	0.8715	1.0563	1.1856	1.0565	1.1508	0.8225	1.0560	0.7842	1.0394
1762	0.9732	0.9695	0.9035	0.9023	0.7289	0.9756	0.9953	0.9333	1.1657	0.8959	0.9470	1.0757	1.1797	0.9963	0.9022	0.9650	0.8851	0.9540	1.0051	0.9778	0.9782	1.0591	0.9918	0.6885	0.6931	0.8052	1.0329	0.9897	0.9686	0.9750	1.1022	1.1250	1.0003	0.7959	1.0117	1.0395	0.9999	0.8448	0.7798	1.2518	0.8585	0.9251	0.8390	1.0981	0.8405	1.1059	0.7857	0.9397	1.0209
1763	1.0517	0.8090	0.9478	1.0181	0.9449	1.1079	0.8933	1.0775	0.9580	0.9502	0.9920	1.0102	0.9952	1.0202	1.0966	0.9935	0.9516	1.0053	1.1037	0.9691	0.9289	0.9090	0.9026	1.1217	1.0497	1.1211	0.9816	1.0883	0.8807	0.9404	1.0399	0.8153	1.0782	0.9375	0.9143	1.3199	1.0369	0.9706	0.9938	1.1800	0.9826	1.0348	0.9148	0.9954	0.9398	1.1579	1.0454	1.1681	1.2902
1764	0.7059	0.7607	0.9988	1.0850	0.9448	0.9191	0.9318	1.0890	0.9279	0.9647	0.9717	0.9615	1.0161	0.9555	0.9567	0.9092	1.3237	1.0950	1.1527	0.9634	1.0057	0.8670	1.0415	1.1416	1.1720	1.0319	0.8810	0.9528	1.0047	0.9206	0.7081	0.8102	0.6716	0.8715	0.9333	0.8026	1.0543	0.9078	0.8041	0.6184	0.9715	0.9844	0.8509	0.9343	0.9350	1.2545	0.8524	0.9546	1.0222
1765	0.5351	0.6143	0.8597	0.4431	0.7236	0.6644	0.8505	0.4626	0.7817	0.7062	0.7744	0.5887	0.5704	0.7093	0.9177	0.5325	0.5699	0.7692	0.7120	0.9025	0.7459	0.8417	0.6124	0.8919	0.8012	0.8987	0.7689	0.9917	1.1288	0.8891	1.1913	1.2419	0.7134	1.0436	1.0844	0.5514	1.0486	0.7402	1.2098	1.1042	0.6702	0.7535	0.8503	0.9543	1.0149	0.5982	0.7938	0.5710	0.4354
1766	1.0956	1.2023	1.1002	1.5387	0.8703	0.9943	1.4350	1.3252	1.1266	0.9952	1.1280	1.1111	1.1369	1.0534	1.1470	1.0625	1.2159	1.1659	1.1262	1.1022	1.2457	1.2892	1.1147	0.8754	0.9093	0.8391	1.1097	0.8704	0.8912	0.9371	1.1164	0.9527	1.2357	1.0695	0.9373	1.2782	0.9094	1.1298	0.9772	1.0517	1.4238	1.1117	1.1155	1.2218	1.1502	1.4853	1.1497	1.0397	1.2666
1767	1.0057	1.0233	1.0723	1.0523	1.2194	1.4236	1.3664	1.3671	1.1767	1.1171	1.0682	1.1481	1.2854	1.2099	1.0473	1.0783	0.7372	1.1575	0.8857	0.9937	1.0610	1.0281	1.2076	1.1308	1.1495	1.0534	1.1250	1.0232	0.9959	1.0049	1.0447	0.8338	1.2083	1.0749	0.9727	0.9108	0.9960	0.9736	0.8836	0.7962	1.0638	1.1127	1.2646	1.2675	1.2087	1.3034	1.3187	1.0165	1.1160
1768	1.0939	1.1795	1.0976	1.0788	1.0312	1.1101	0.5619	0.9046	1.1524	1.1720	1.0908	1.1841	1.1847	1.1382	1.0654	1.1772	0.9342	1.0658	0.9602	1.0791	1.0378	0.9307	1.1975	1.0274	1.1262	1.0524	1.0544	1.1276	1.2382	1.0940	0.9148	1.1182	1.3593	1.1841	1.0813	1.3289	1.0743	1.0056	0.9206	1.3171	0.8745	0.9940	0.7714	0.7888	0.9011	0.8842	0.8403	0.8838	1.3626
1769	1.1290	1.0657	0.8821	0.9030	0.9082	0.8027	1.1362	1.1907	0.9937	1.0241	0.9555	1.0952	1.0614	1.0632	0.8109	0.8799	0.9795	1.1341	0.9486	0.9039	0.9113	1.1362	0.9815	1.0420	0.9812	1.0848	0.9241	0.8386	0.7800	1.0460	1.1456	0.9324	1.2113	1.1664	0.9462	1.2371	0.8466	0.8914	1.0031	1.3441	1.1753	1.1101	0.9217	1.3617	1.2672	1.0159	1.3768	1.1163	1.3034
1770	0.4804	0.6938	0.9943	0.6002	0.7657	0.5685	0.7785	0.6718	0.6905	0.7082	0.9962	0.7990	0.7667	0.7483	0.9740	1.0167	0.6703	0.9263	0.7887	1.0562	0.9177	1.0024	0.6764	1.1729	1.1594	1.0195	0.8950	1.0821	1.2264	0.8778	1.4570	1.1275	0.6540	0.7567	0.9490	0.4848	1.0779	1.0706	1.3045	1.0241	0.5210	0.9016	0.6652	0.6881	0.9975	0.7632	0.6472	0.4961	0.5674
1771	1.5074	1.3730	1.0308	0.9937	1.4449	1.1755	1.0361	1.0662	1.1938	1.0906	1.0508	1.1528	1.1782	1.2173	0.9538	1.1180	1.4347	1.2673	1.1099	0.9417	1.2110	1.1753	1.2071	0.8880	0.8742	1.0090	0.9808	0.8249	0.8230	1.0233	0.9565	0.8482	1.1586	1.1270	0.8393	1.0935	0.8694	0.9350	0.7565	1.1199	1.1146	0.9962	1.0547	0.9349	0.8356	1.1045	0.8585	1.2685	1.1023
1772	1.1194	1.1816	1.1610	0.8557	1.0152	1.2887	0.8720	0.8195	1.0008	0.9069	1.0550	1.0823	1.0776	1.0527	1.0231	0.9776	1.1155	1.0521	1.0207	1.1493	0.9740	0.7039	1.0306	0.9538	1.0260	0.9132	1.0777	1.1512	1.2115	1.0607	0.5387	1.0781	0.9834	1.0090	1.0839	1.2091	1.0939	1.0494	0.9987	0.9624	0.8803	0.9870	0.8571	0.8152	0.9500	0.8565	0.9080	1.2171	0.9127
1773	0.9437	0.8625	0.9867	0.8796	0.8221	0.8903	0.9398	1.1065	1.0115	0.8992	0.9023	0.9641	0.9645	0.9721	1.0012	0.9465	0.7821	0.8557	0.9304	0.9455	1.0728	1.0845	0.9964	0.9231	1.0835	0.9402	1.0462	0.8872	0.9362	1.1334	1.1404	0.9479	1.5080	1.2730	1.1192	1.3825	1.0225	1.1613	1.1449	1.3944	0.8575	1.2248	0.9419	1.2299	1.1520	0.9752	1.1346	1.0575	0.8554
1774	1.1610	1.2359	1.0378	1.2679	1.1072	1.0642	1.0937	1.0189	1.0597	0.9985	1.0565	0.9917	0.9679	1.0110	1.0737	1.1202	1.0826	1.2763	0.9739	1.1178	1.0549	1.0125	1.0051	1.1632	0.9827	1.0345	1.1985	0.9748	1.0905	1.1078	1.0136	0.8487	1.0329	1.1291	0.8453	1.0524	1.0756	1.1153	0.9444	1.1741	1.1964	0.8936	0.6163	1.0462	0.8380	1.1496	0.9601	0.9999	1.1833
1775	0.9547	0.9719	1.0590	1.1511	0.9922	1.1182	1.1216	0.8611	0.9941	0.9930	1.0146	0.9677	0.9759	0.9288	0.8913	1.0594	0.8225	1.1796	1.1434	1.0422	1.0632	1.0249	0.9437	0.8435	0.9513	0.8689	1.1895	1.0235	1.1606	1.0091	1.1013	1.1255	0.9663	1.0616	1.0728	0.9453	1.1456	1.2534	1.2589	0.9337	1.3257	0.9045	0.9169	1.0008	0.8881	1.1648	0.9581	1.0376	0.8194
1776	0.6339	0.8413	0.7103	0.6873	0.8997	0.6687	0.6923	0.9053	0.8422	0.8472	0.8141	0.8798	0.8405	0.9271	1.1102	0.7558	1.0332	0.9666	1.0163	0.8709	1.0240	1.0465	0.8234	0.8545	1.1171	1.0348	0.8184	0.9625	0.9708	0.4555	0.5432	0.4569	0.5384	0.9617	0.7806	0.5040	0.8904	0.4268	0.9782	0.7636	0.9358	0.7524	0.9565	0.7498	0.9122	0.8658	0.7763	0.8385	0.4959
1777	0.6654	0.6540	0.5360	0.6219	0.5366	0.5281	0.5763	0.6230	0.7070	0.7280	0.6419	0.7223	0.7685	0.7331	0.8473	0.7593	1.2319	0.7669	1.0490	0.5010	0.7076	0.6834	0.6789	0.9393	0.7010	0.8418	0.7128	0.8675	0.9668	0.6149	1.2526	0.7934	0.9346	1.0046	0.7475	0.6914	0.8784	0.6756	0.9755	1.1052	0.5274	1.0092	1.1003	0.6806	1.0513	0.6513	0.5984	0.7692	0.6291
1778	1.0879	0.9946	1.0269	0.8742	0.8575	0.7230	0.8610	0.8961	0.9996	0.9404	1.0589	0.9762	1.0132	0.9805	1.0592	0.8853	0.8084	1.1345	0.8418	1.0100	1.0559	1.0522	1.0164	0.8788	0.9196	1.0215	0.9036	0.8486	0.8461	0.9570	0.9675	0.7617	0.7722	0.7913	1.0233	0.9153	0.8948	0.9710	0.7982	0.7703	1.0400	0.9225	1.4611	1.1091	1.3436	1.0309	1.2726	1.0767	0.7861
1779	1.3083	1.3004	1.1862	0.9360	1.1497	1.1398	0.9154	1.0048	1.1302	1.0504	1.1487	1.0879	1.0895	1.0609	0.9199	1.0031	1.0571	1.0360	1.0728	1.2523	1.0007	0.8113	1.1254	0.9269	0.9506	0.9131	0.9521	1.1382	1.0300	1.1879	0.9863	1.0647	0.9843	1.0038	1.1408	1.1269	1.0066	1.0680	1.0749	1.0014	1.1699	1.0070	0.8017	0.9853	0.9248	1.3426	1.0090	1.0876	1.2435
1780	0.6780	0.8364	1.2230	1.0508	1.1789	1.0196	1.0053	0.9041	0.9773	0.9345	1.1100	0.9182	1.0108	0.9797	0.9253	1.0032	0.7342	0.8997	0.9996	1.1742	1.2626	1.1127	0.9824	0.9779	1.0468	0.9372	1.0117	1.1121	1.1259	1.0488	1.1668	1.1006	0.9557	0.9086	1.0219	1.1588	1.1196	1.1366	1.1228	1.2441	0.8962	0.8714	0.9436	0.9908	1.0749	1.0173	1.2257	0.8460	0.8426
1781	0.7431	1.0392	0.9995	1.1850	0.8804	0.8476	1.0911	1.0911	1.0716	1.0365	0.9577	1.0424	1.1342	1.0855	0.9565	0.9407	1.1433	1.0391	1.1422	0.9555	1.1772	1.0180	1.1087	1.0535	1.0042	1.0883	0.8698	0.9420	0.8765	1.0376	0.9351	0.8463	1.1485	1.1303	0.7791	1.0111	0.9460	0.8629	0.8049	1.1058	0.8322	0.8889	0.9110	0.9354	0.8053	0.9899	1.1694	0.8727	0.9601
1782	0.4865	0.4950	1.0319	0.7593	0.5401	0.7129	0.6268	0.5425	0.8156	0.8008	0.5767	0.7543	0.7438	0.8022	0.8566	0.7552	0.3925	0.5286	0.7409	0.8989	0.3107	0.6400	0.7249	0.5894	0.5344	0.7047	0.7102	0.9509	0.7426	0.8937	0.8724	1.0317	0.8905	1.0226	0.9718	0.9892	0.8455	0.7697	1.0407	1.0365	0.6769	0.7098	0.6518	0.6860	0.7233	0.4163	0.6990	0.2306	0.4495
1783	0.6397	0.7056	0.8202	0.7744	0.6387	0.6409	0.6690	0.6664	0.9092	0.8547	1.0085	0.8739	1.0191	0.9452	0.9354	0.7814	0.7322	1.1037	1.0013	0.9020	1.1711	1.0018	0.9851	0.9368	0.9620	0.9701	0.7397	0.8746	0.7585	0.6094	0.9533	0.7717	0.5676	0.6616	0.5749	0.5110	0.8975	0.7467	0.8202	0.5197	0.6685	0.8470	0.7442	0.7337	0.9814	0.8003	0.6149	1.2571	0.5690
1784	1.3158	1.5179	1.2068	1.9656	1.2249	1.3827	1.2874	1.3196	0.9641	1.0620	1.1961	1.0140	1.0194	1.0432	0.9939	1.0346	1.0963	1.1857	1.0795	1.1952	1.1675	1.1251	1.1239	1.1410	1.0208	1.1035	0.9743	1.1490	1.1076	1.1298	1.1710	1.0684	1.2897	1.1568	1.0822	1.2181	1.0560	1.0734	1.1801	1.0801	1.3286	1.1029	1.3357	1.2687	1.1679	1.2610	1.4079	1.5213	1.7389
1785	1.2434	1.1883	1.1407	1.5636	1.4300	1.4590	1.5131	1.3745	1.2348	1.2272	1.1713	1.2873	1.3980	1.2347	0.8960	1.1025	1.1405	0.8899	1.1678	1.1782	1.0393	1.2996	1.2197	1.0092	1.1311	1.0028	1.1068	1.0895	1.0943	1.1489	1.3848	1.0143	0.7968	0.9835	1.0020	1.1304	1.0213	1.0632	1.1078	0.9110	1.0257	1.1526	0.9139	1.3333	0.9099	1.0809	1.3346	0.8510	1.6781
1786	0.8707	0.8799	1.0596	1.2325	0.8742	1.0062	1.4015	1.2055	1.1239	1.0214	1.0901	1.0910	1.0379	1.0597	0.9921	1.0399	0.9425	0.9917	0.9174	1.0923	1.0231	0.9820	1.0908	0.9628	1.0625	1.0826	1.0565	1.0101	1.1261	1.0919	0.9088	0.9966	0.8718	1.0591	1.0104	1.2885	1.0830	1.0869	1.0561	1.0299	1.0599	1.0726	0.8726	1.0566	0.9543	1.1004	1.1848	0.9169	0.9297
1787	1.3076	1.2711	1.0233	1.2290	1.3251	1.4358	1.2584	1.1420	0.9215	0.9105	1.0050	0.8744	0.9633	0.9328	0.9332	1.0024	1.2454	1.1715	1.1687	0.9294	1.1389	1.0975	0.8617	0.8524	0.8654	0.9699	0.7430	0.9456	0.7867	0.8630	0.7740	0.9309	0.8090	0.9568	0.9975	0.8156	0.9774	0.7831	0.5937	1.0095	1.3085	1.0272	1.3456	1.0253	1.1519	1.2667	1.2062	1.1836	1.7483
1788	0.6901	0.7937	0.9720	0.5430	0.7855	0.6104	0.4777	0.5895	0.8700	0.8100	0.9288	0.8111	0.8987	0.8274	0.8198	0.9925	0.7862	0.7564	0.8490	0.9911	0.9511	0.8104	0.7568	1.0426	0.9771	1.0239	0.8331	1.0849	1.0382	0.9122	0.8963	1.0215	0.8020	0.8213	0.9108	0.8396	1.0346	1.0069	0.8565	0.9021	0.6203	0.9126	0.7987	0.7753	0.8176	0.7509	0.7622	1.1177	0.4942
1789	1.6564	1.5970	0.9444	1.5250	1.2478	1.1513	1.0774	1.4318	0.9411	0.9297	1.1459	0.8632	0.8725	0.9215	1.0161	1.1824	1.1723	1.1555	1.1687	1.0019	1.1573	1.1356	1.0245	1.2126	1.2503	1.2179	1.0352	1.2592	0.9781	1.2015	1.1001	1.0141	1.4266	1.2500	1.0923	1.2609	1.0547	1.1387	1.0169	1.3540	1.5683	1.1920	1.5379	1.1838	1.2786	1.3600	1.3089	1.4171	1.4255
1790	1.4377	1.2465	1.0680	1.1819	1.2916	1.3646	1.2663	1.3595	1.0362	1.0648	1.1544	1.0569	1.1437	1.0227	1.0567	1.0280	1.2998	0.8560	1.0246	1.0359	1.1237	1.0251	1.0276	1.1166	1.2460	1.0369	0.9009	1.1144	0.9556	1.0133	1.0613	1.0213	1.3325	1.0912	1.1682	1.0669	1.0247	0.9696	1.0461	1.2141	1.4016	1.3046	1.2954	1.2631	1.1561	1.2810	1.2888	1.5303	1.1477
1791	1.0125	0.8281	0.9354	1.1754	1.0016	1.1431	0.8369	1.0994	1.1659	1.0981	1.0336	1.1277	1.1504	1.0404	1.0023	0.9294	1.0922	1.1549	1.0113	0.9156	1.2033	1.1129	1.1012	0.8304	0.9778	0.9704	0.9027	1.0749	0.9089	1.1453	1.1585	1.3806	1.2236	1.0427	1.5723	1.1704	0.8980	1.0676	1.2846	1.2528	1.0106	1.1675	0.7771	1.1978	0.8839	1.0226	1.0544	0.8172	0.6223
1792	1.5936	1.4297	1.0057	1.2117	1.1975	1.1708	1.1147	1.2674	1.1914	1.1121	1.0920	1.1129	1.3009	1.1043	1.2060	1.0641	1.4777	1.2118	1.1539	1.0059	1.2505	0.9171	1.1438	1.2807	1.4395	1.0741	1.0651	1.1875	1.1233	1.1703	1.0085	0.9494	0.8115	0.9486	1.0957	1.0238	1.0707	1.2157	1.2074	0.8375	1.5263	1.2273	0.9056	1.2321	1.0156	1.0906	1.4106	1.2853	1.1312
1793	0.9443	1.0609	1.0073	1.1862	0.9088	0.8751	1.1524	1.1229	0.6558	0.7377	0.9936	0.7627	0.7566	0.7418	0.7876	1.0118	1.3882	0.9819	1.1186	1.0020	1.3069	1.1378	0.7905	0.9401	0.7854	0.9046	1.0079	0.9184	1.0170	1.0552	0.8674	1.0563	0.7196	0.6354	1.0142	0.3390	0.9619	1.0000	1.0473	0.3142	1.1703	0.9244	0.7316	0.8804	0.8027	1.0952	0.8307	0.8303	0.8397
1794	0.6706	0.5889	0.9106	0.6845	0.9469	0.9112	0.8601	0.6397	0.9922	0.9717	0.9197	0.9890	1.0539	1.0468	1.0195	0.9760	0.7670	0.8046	1.0268	0.9196	0.6105	0.6923	0.9260	0.9905	1.0333	0.9681	0.9859	1.0382	1.1362	0.6718	0.6755	0.8610	0.5656	0.7827	0.8799	0.9355	1.1015	0.7957	0.6955	0.7318	0.5832	0.8740	0.7032	0.6495	0.7440	0.7144	0.5566	0.9402	0.5928
1795	0.4553	0.4707	0.7127	0.5327	0.6463	0.4678	0.5828	0.4992	0.7969	0.7212	0.6254	0.7181	0.8510	0.8990	0.8060	0.4240	0.5607	0.8807	0.7258	0.8384	0.4462	0.5385	0.8704	0.5684	0.5953	0.7398	0.4978	0.7851	0.8195	0.6623	1.0905	0.8116	0.7172	0.9878	0.9541	0.9200	0.8452	0.4815	0.9454	0.8206	0.4877	0.7795	0.9346	0.7482	0.9215	0.4245	0.7642	0.4711	0.5048
1796	0.6050	0.7163	0.9962	0.7610	1.0016	0.9350	1.0832	0.9523	0.9943	0.9856	0.9376	0.9791	1.0168	1.0395	0.8413	0.8052	1.0763	1.0614	1.0225	1.0240	1.2724	1.1120	1.0459	0.7163	0.7323	0.8098	0.7870	0.7790	0.7951	0.8729	0.9503	0.9155	1.3072	1.1370	0.8372	1.2062	0.8698	0.9780	0.9152	1.3395	0.7898	0.8068	0.9548	0.9414	0.9707	0.8315	0.8524	0.9653	0.6315
1797	1.3389	1.5424	1.2097	1.1453	1.1914	1.1120	0.9306	1.0411	1.3233	1.1469	1.2323	1.2038	1.3593	1.1555	1.0285	0.9876	1.2640	1.0130	1.0201	1.1676	1.1353	1.1197	1.2708	1.1507	1.2121	1.3024	1.0051	1.0143	0.9768	1.0821	0.7402	0.8481	1.1074	1.1059	0.8360	1.0061	1.0075	0.9838	0.8075	1.0336	1.3302	1.0781	1.2846	1.0347	0.9733	0.9837	1.4690	1.1158	1.0662
1798	1.2406	1.2413	1.1150	0.8973	1.0524	1.0660	1.0146	1.2569	1.2221	1.1264	1.1630	1.1666	1.1794	1.1236	0.9774	1.1613	1.1524	1.0239	1.2095	1.0488	1.0251	0.9295	1.1860	0.9668	1.0419	1.0348	1.0708	1.0206	1.1317	1.0811	0.9067	0.9163	1.2157	1.1561	0.8939	0.9474	0.9986	0.9203	0.9758	1.1597	1.1329	1.1233	1.2338	1.1035	0.9883	1.1311	1.3936	1.1398	1.1053
1799	1.1169	1.2969	0.9339	1.2279	1.5440	1.3620	1.1184	1.1554	1.2682	1.2138	1.0776	1.2139	1.2528	1.1119	1.1924	1.2067	1.1548	1.1087	1.0774	1.0059	1.1232	1.1633	1.1935	1.0548	1.0791	1.0281	1.0016	1.0916	1.0010	1.1540	1.2608	1.2073	1.0895	1.0319	1.1919	1.4981	1.0070	1.1498	1.2457	1.2954	1.0575	1.2139	0.9542	1.1156	1.0865	1.2037	1.0956	1.2532	1.0260
1800	0.6734	0.7826	1.0600	0.5975	0.8693	1.1243	0.8223	0.6693	0.7527	0.7084	1.0782	0.7279	0.8362	0.7695	1.0188	1.1489	0.8252	0.9063	0.9193	1.0573	0.8145	0.8665	0.6931	1.1407	1.1131	1.0537	0.9389	0.9977	1.1452	0.9204	0.7302	1.1548	0.2428	0.5655	0.8769	0.3712	1.0860	0.9445	0.9605	0.4966	0.6290	0.9584	0.5422	0.6712	0.7129	0.8614	0.6861	1.0092	0.6324
1801	1.3669	1.3080	1.0517	1.5509	0.9664	1.0754	1.1105	1.2368	1.2326	1.1661	1.0924	1.1849	1.2442	1.1263	0.9316	1.1163	1.2799	0.9892	1.1186	1.0973	1.1027	1.0095	1.2106	0.9160	0.7468	1.1349	0.9215	0.9303	0.9726	1.1924	1.0067	0.9734	1.5925	1.0256	0.9789	1.3316	1.0345	1.0000	0.9898	1.1685	1.3266	0.9154	1.5083	1.0042	1.0800	1.0641	1.2491	1.4159	1.1754
1802	0.9752	0.7640	1.1148	1.3682	1.1637	1.2871	1.3337	1.3296	0.9832	0.9505	1.1055	0.9469	0.9415	0.9760	0.9936	1.0850	0.9633	1.0611	0.9229	1.1064	1.1172	1.0712	1.0419	0.9420	1.0010	1.0037	1.0435	1.0841	1.0763	0.9547	0.9878	0.9372	1.2619	1.1800	1.1132	1.2119	1.1083	1.0983	1.2203	1.2559	0.8786	1.1549	1.0195	1.0007	1.0378	1.0467	0.9800	0.9895	0.7130
1803	0.5930	0.6775	1.0321	0.6313	0.9534	0.8547	0.9115	0.7292	0.9340	0.9658	1.0196	1.0511	1.0224	1.0161	1.0480	1.0304	0.5675	0.9585	0.7949	0.9780	0.8959	1.0744	0.9205	1.1977	1.2335	1.1600	1.1316	1.1849	1.0862	1.0749	1.4965	1.3207	1.1766	1.0714	1.3306	1.4985	1.0401	1.0938	1.4694	1.2000	0.7797	0.8948	0.8670	0.9186	1.0399	0.6870	0.7854	0.4011	0.5255
1804	1.1565	1.2989	0.9075	1.1540	1.0436	0.8785	1.2403	1.1687	1.0411	1.0275	0.9573	1.0971	1.1406	1.0047	0.8888	1.1955	1.2729	1.1915	1.0836	0.8861	1.2268	1.3928	0.9389	0.9316	0.9988	0.8738	1.0725	0.8714	1.0735	1.0692	0.7150	1.0899	1.0405	0.9932	0.9429	0.7751	1.0472	1.2046	1.0016	1.1104	1.2247	1.1465	0.8387	1.0438	0.9137	1.2942	0.9597	1.0527	0.9899
1805	0.8473	0.8583	0.9984	0.6881	0.9385	0.9387	0.9472	0.9224	0.9214	0.8800	0.9994	0.8655	1.0049	0.9626	1.0902	0.9403	0.8890	0.9790	0.9845	0.9931	1.1277	1.2520	0.8951	1.1726	1.1534	1.1573	0.9589	1.0004	1.0829	0.9531	1.3019	1.1414	0.9427	1.1868	1.0555	1.2890	1.0822	1.1861	1.1293	1.2406	0.7838	1.1389	0.9200	1.0297	0.7782	0.9505	1.0672	0.9926	0.7950
1806	0.9222	0.8296	0.9866	0.8254	0.9061	0.8049	0.8182	1.1396	1.0118	0.9923	0.9573	1.0693	1.0417	1.0345	0.8145	1.1071	0.8777	0.9761	0.9204	0.9928	0.8635	0.9424	1.0441	0.9224	0.8388	1.0667	0.9693	0.9946	1.0331	1.0115	0.9034	1.2249	1.0910	1.0782	0.9765	0.8902	1.0575	1.0965	0.9580	1.3269	1.0079	1.0461	0.7243	1.0450	0.8473	0.9795	1.1094	0.8149	1.1499
1807	0.7818	0.8661	1.0335	0.7645	0.9257	0.9830	0.9758	0.9365	1.0553	0.9415	0.9851	0.9722	1.0537	0.9850	0.9144	0.9231	0.9215	0.7338	0.9160	1.0591	0.6771	0.9288	0.9155	0.9382	0.9942	0.9197	0.8458	0.8718	0.9321	1.0466	0.6563	1.0991	0.8659	0.7224	0.9045	0.7070	0.9682	0.9274	0.7969	0.6341	0.6575	0.8675	0.8911	0.8903	0.8616	0.7851	0.8561	0.9574	0.8747
1808	0.8767	0.8554	1.0313	0.7431	0.9580	0.7623	0.8704	0.8167	0.8848	0.7951	0.8996	0.8521	0.9484	0.8906	0.8228	0.9186	1.1484	1.0601	0.9912	0.9998	1.0786	1.0388	0.9907	1.0150	0.9902	0.9005	1.0563	0.9850	0.8934	1.0590	1.0721	1.0003	0.9598	1.0410	1.1162	1.0206	0.9401	1.1485	1.0785	0.9713	0.7794	0.9134	0.8600	0.9629	0.9292	1.0563	0.9385	1.0524	0.6456
1809	0.6791	0.5833	1.0387	0.8583	0.8909	1.1770	0.6517	0.7963	0.9373	0.9637	0.9837	0.9996	0.9290	0.9706	1.1729	0.9380	0.5394	0.8907	1.2495	1.0454	0.8411	1.0051	0.9059	1.2020	1.2930	1.0683	1.1393	1.1147	1.1270	1.2525	1.4278	1.3670	1.2183	1.0672	1.2613	1.2827	1.0574	1.3048	1.5066	1.3583	0.5976	1.0792	1.0242	0.9144	0.8834	0.6036	0.9020	0.9202	0.6563
1810	0.9965	1.1007	1.0314	0.7219	0.7885	0.7521	1.1863	1.1344	0.7989	0.9533	1.0811	0.9327	0.7577	0.8387	1.0863	1.0470	0.9591	0.8879	0.8798	1.0309	0.9577	1.0302	0.8413	0.9361	1.1501	1.0503	1.1646	1.1616	0.9035	1.1332	0.8164	1.0823	1.1915	1.0874	1.0159	0.9851	1.1410	1.1939	0.9783	1.2074	0.9081	1.0506	1.0827	1.0909	1.0271	1.0197	1.1678	1.1781	1.1833
1811	1.3790	1.3115	1.0600	1.1916	1.1505	1.2827	1.1162	1.2297	1.2672	1.1824	1.1508	1.1323	1.2055	1.0225	1.1645	1.0184	0.9597	1.1608	0.9506	0.9715	1.1176	1.1360	1.0466	1.1572	1.3427	1.2496	1.1050	1.4777	0.9706	1.1606	0.9501	1.0530	1.2623	1.0302	0.9355	1.1192	1.1325	1.2029	1.0264	1.1666	1.2318	1.1469	1.0908	0.9953	0.9628	1.4236	1.0335	0.9997	1.3951
1812	0.8195	0.9547	0.7937	0.8108	0.8253	1.0831	0.8091	0.7201	0.8075	0.8691	0.9514	0.8655	0.9942	0.8998	0.9742	1.0099	0.8799	0.8804	0.9261	0.8727	0.8653	0.7674	0.7632	0.9934	1.0423	0.9352	0.9014	0.9652	1.0034	1.1154	1.2228	1.2434	1.1163	0.9883	1.1632	0.7217	0.9886	0.9959	1.2753	1.2758	0.5903	1.0482	0.9100	0.7510	0.8341	0.6833	0.8874	0.5640	0.7297
1813	1.1311	1.1204	0.9712	0.9734	1.1027	1.0186	1.2133	1.1073	0.8860	0.8462	1.0540	0.8744	0.8154	0.9986	1.1379	1.0021	0.5130	0.7947	0.7652	0.9566	0.7396	0.8523	0.9735	0.9701	0.8490	0.9862	0.8612	0.7972	0.8386	1.0812	0.7116	0.8486	0.8377	0.9006	0.9685	0.8114	0.8452	0.9498	0.7734	0.7274	1.2913	1.1113	1.0898	1.0298	0.9795	0.8916	1.3476	1.1693	1.5327
1814	1.0726	1.1172	1.1681	0.9086	0.9594	0.7883	1.1954	1.2574	0.9553	0.9681	1.0789	0.9894	0.9835	0.9428	1.2398	1.0595	1.0284	1.0403	1.1312	1.1309	1.1572	1.1468	0.9494	1.2447	1.2369	1.0585	1.1772	1.1484	1.2175	0.8664	1.2069	1.2577	0.9230	0.7961	1.1600	0.8763	1.0886	1.0353	1.3067	0.5834	1.1096	1.0950	1.2145	0.9180	1.2030	1.0193	0.9052	1.0392	0.6980
1815	1.1632	1.0940	1.0612	0.9400	1.1004	1.2187	1.0405	0.9039	1.1298	1.0804	1.0256	1.1001	1.0556	1.0492	0.9579	0.8691	0.6937	0.9622	0.9085	0.9778	0.9984	1.2405	0.9551	0.8923	0.7948	0.9326	0.9881	0.8954	0.9759	0.9501	0.7742	0.7917	1.1113	1.0559	0.8131	1.0701	0.9639	0.9660	0.7944	0.9880	0.8885	0.9389	0.7399	0.9340	0.9336	1.0096	0.9946	1.1474	0.8816
1816	1.1876	1.2445	1.0654	1.2922	1.3966	1.4463	1.2137	0.9869	0.8385	0.8600	1.0531	0.8858	0.8848	0.8013	1.0793	1.0105	1.5425	0.9169	1.1154	1.0074	1.2178	1.3421	0.8625	1.0620	0.9731	1.0305	1.0203	1.1002	0.9743	1.0281	1.1466	0.8683	1.0644	1.0312	1.0445	1.0226	1.0379	1.0981	1.0223	1.0577	1.2874	1.0344	1.0632	0.9294	1.0218	1.2290	1.0829	0.9885	0.9001
1817	1.4495	1.2066	0.9389	1.2977	1.1282	1.1002	0.9204	1.0091	1.3429	1.2430	1.0206	1.2437	1.3165	1.2480	1.1665	1.0336	1.3421	1.0461	1.1557	0.9039	1.0402	0.6873	1.2689	1.0293	1.1788	1.1625	0.9244	1.0632	1.0805	1.0117	1.0420	0.7653	0.9683	0.9290	0.9479	0.9447	0.9568	0.9612	0.7733	1.0447	1.2543	0.9980	1.1391	0.9928	1.0562	1.4014	0.8935	0.9623	1.1829
1818	1.0280	0.9883	1.0223	0.6747	0.8417	0.9284	1.0599	0.7668	0.7411	0.8398	0.8907	0.8989	0.8588	0.9000	0.9936	1.1758	0.9334	1.1015	1.0759	0.9544	1.2479	1.1747	0.8801	1.1852	1.2289	1.0961	1.2089	1.1499	1.1509	1.0617	1.2884	1.1565	1.4501	1.2076	1.1826	1.0946	1.0311	1.0913	1.2454	1.3629	0.9992	0.8100	0.6937	0.7478	1.0022	0.9647	0.6909	0.9584	0.8016
1819	1.1323	1.1529	0.9547	1.4593	0.9906	1.1537	1.1320	1.2450	1.0508	0.9682	1.0262	1.0844	1.0793	1.0833	1.0051	1.1378	1.0459	0.9002	0.9467	0.9443	1.1797	0.9652	0.9644	0.9352	0.9838	0.9477	1.1183	0.8843	0.9954	1.0792	0.7927	1.0689	1.0123	1.0288	1.0701	0.8944	1.0503	1.0852	0.7983	0.8468	1.0503	1.0487	1.4246	1.1039	1.1651	1.2245	1.0694	0.9699	1.4028
1820	0.9380	0.8990	1.0571	0.9977	0.9470	1.0277	1.1008	1.2444	0.8715	0.9234	1.0441	0.9543	1.0261	0.9929	1.0167	1.0279	0.7620	0.8319	0.8942	0.9944	0.7960	1.1399	0.9548	0.9982	0.7966	0.8920	1.1095	0.9326	0.8938	1.0229	0.8368	0.9271	1.1100	1.1423	0.8693	1.0093	1.0181	1.0065	0.7972	0.9613	0.9882	0.9211	1.0315	1.1646	0.9008	0.8841	1.0573	0.8561	1.2159
1821	1.3028	1.2169	1.0379	1.4717	1.4562	1.3059	1.1252	1.0087	0.9241	0.9757	1.0417	0.9549	0.9987	1.0608	0.9863	0.8778	1.3105	1.2675	1.3282	1.0360	1.1112	0.9035	1.0327	0.9559	0.8463	0.9384	0.8472	0.6631	0.8064	0.7664	1.1056	1.0309	0.8872	0.9355	1.0599	1.0746	0.8177	0.8614	0.7215	1.1158	1.2316	1.0121	1.3293	1.0214	1.0103	1.2864	0.6306	1.0875	1.0377
1822	0.8337	0.8516	0.8787	0.5145	0.6775	0.6234	0.8157	0.8522	0.8834	0.8534	0.8271	0.8490	0.9118	0.9869	0.9785	0.7163	0.5212	0.6943	0.7961	0.9023	1.0244	1.0530	0.8692	0.8479	0.7435	0.8769	0.7665	0.8547	0.8914	0.6175	0.7600	0.7059	0.7185	0.9598	0.7980	0.8399	0.8453	0.5486	0.9443	0.9821	0.7840	0.8561	1.0103	0.7809	1.2057	0.7680	0.6540	0.7083	0.7291
1823	0.8042	0.8545	0.9861	0.8034	0.8742	0.8799	0.7957	0.8946	0.7996	0.8617	0.9247	0.8897	0.8396	0.9083	0.8865	0.9348	0.6307	0.5564	0.7753	0.9906	0.5113	0.7426	0.8010	0.8477	0.9604	0.8909	1.0041	0.8698	1.0076	0.9112	1.1040	0.9018	1.2416	1.0339	0.9360	1.1835	0.9344	0.8722	0.8143	1.0896	0.8552	0.9468	0.9529	1.1754	1.0053	0.7404	0.8887	0.9079	1.2013
1824	0.6788	0.7936	1.0715	0.9052	1.0804	0.9086	0.9233	0.9496	0.8936	0.7975	0.9169	0.8692	0.8231	0.9061	0.7878	0.9748	0.7192	1.1140	0.8896	1.0740	0.9639	0.8459	0.8303	0.6672	0.7501	0.6969	0.9137	0.8477	0.9962	0.9775	1.1039	0.9963	1.1809	0.9658	1.0240	0.8212	1.0233	0.9819	1.0285	0.8047	0.7940	0.7802	0.6167	0.9368	0.8266	0.9260	0.8590	1.1253	0.8348
1825	1.9347	1.4886	1.0883	1.3659	1.4941	1.3211	1.2143	1.1450	1.1871	1.2166	1.1303	1.1564	1.1574	1.2150	1.2773	1.1302	1.4821	1.2045	1.2086	1.0720	1.2704	1.1064	1.1261	1.0647	1.1499	1.1673	1.1500	1.1036	1.1636	1.3221	1.0989	1.1516	1.4859	1.2034	1.1785	1.6745	1.0307	1.1341	0.9733	1.3071	1.9564	1.1663	1.6406	1.1626	1.0981	1.7588	1.1046	1.4661	1.7814
1826	1.1942	1.1510	0.9905	1.5577	1.1072	1.3321	1.3453	1.2370	1.1612	1.2293	1.0963	1.1808	1.1821	1.2858	1.1944	1.2165	1.1521	0.9459	0.9911	0.9671	1.2052	1.0588	1.2347	1.1172	1.3005	1.1111	1.2639	1.1611	1.1980	1.1377	1.0067	1.1306	1.2578	1.1131	1.0818	1.2247	1.0854	1.1410	1.0384	1.2471	1.2721	0.9925	1.2710	1.2815	1.2107	1.0746	1.1190	0.8881	1.4564
1827	0.7752	0.8112	0.9653	0.9213	0.9434	1.1083	0.8773	0.9182	0.9312	0.8837	0.9329	0.8937	0.9546	0.9648	0.8529	0.9787	1.0672	0.9527	0.8934	0.9075	0.9147	1.0590	1.0847	0.9012	0.9456	0.9095	1.0009	0.9596	0.8483	0.9960	0.8793	1.0577	0.9588	1.0090	0.9192	0.7518	0.9364	0.9778	1.0727	1.1327	0.7302	0.9236	0.6383	0.8992	0.9054	0.8516	0.8804	0.9146	0.5673
1828	1.4272	1.3016	1.0441	1.2866	1.2882	1.4027	1.2144	1.4298	0.7168	0.8418	0.9894	0.8434	0.8328	0.8806	0.9063	1.0237	1.3761	1.0510	1.2179	1.0181	1.2059	1.1647	0.8506	0.8937	0.9347	0.8296	1.1609	1.1574	1.0325	0.9524	0.7746	1.1427	0.7813	0.6855	1.2008	0.7679	1.1694	1.2034	1.0687	0.8706	1.1694	1.1223	1.0268	1.2005	0.9769	1.4637	1.1101	1.4613	1.6473
1829	0.4534	0.4011	0.9116	0.4960	0.9162	0.5035	0.6435	0.4512	0.7760	0.8395	0.7449	0.7867	0.8117	0.8545	0.9599	0.6584	0.3777	0.8622	0.7302	0.8967	0.4072	0.5768	0.7613	1.0037	0.8386	0.9727	0.4311	1.2553	1.2293	0.6127	0.6155	0.6417	0.3783	0.6969	0.5347	0.6164	0.9820	0.3587	0.7844	0.3790	0.4291	0.5288	0.6771	0.6795	0.5207	0.4866	0.5026	0.3261	0.3400
1830	1.1239	1.1247	0.9837	0.9195	1.0673	1.0376	1.2687	1.1195	1.0065	0.9568	1.0849	0.9392	0.8416	1.1051	1.1400	1.0833	0.9736	1.0028	0.9732	1.0313	1.3599	1.1432	0.9522	1.0272	1.0842	1.0210	0.9779	0.8563	0.7379	0.9485	1.0258	0.8444	1.3700	1.2374	1.0137	1.2766	0.8172	1.0277	0.8362	1.2001	1.1056	1.1348	1.7768	1.2147	1.2246	0.9917	1.3110	1.3253	1.2069
1831	0.9435	0.9550	1.0908	1.1089	0.9347	1.0494	0.9535	1.0570	0.9842	1.0099	1.1148	1.0021	0.9507	1.0246	0.9532	0.9868	1.3738	0.9878	1.0460	1.1244	1.1296	1.1591	1.1154	1.0432	0.6556	0.8780	0.7814	1.1508	0.8993	0.9708	0.7834	0.8341	0.9257	1.0113	0.9908	0.9837	0.8694	0.9532	0.8295	0.9636	0.8340	1.0258	1.0374	0.9833	1.0469	0.8928	1.0365	1.0319	0.6453
1832	1.4556	1.4564	1.1153	1.3707	1.0517	1.2535	1.0617	1.2614	1.3563	1.2870	1.1642	1.3186	1.1664	1.2899	1.3905	1.2106	1.5030	1.3137	1.2128	1.0998	1.2840	1.3165	1.4145	1.4294	1.0407	1.1417	0.8350	1.1908	1.2505	1.2787	1.0849	1.2149	0.9732	1.1775	1.3734	0.9647	1.0528	1.2924	1.3006	1.4363	1.1024	1.1354	0.7840	1.1116	0.9947	1.2101	1.0696	1.1544	1.4855
1833	1.0894	1.1801	0.8910	0.8350	0.9567	0.9434	1.1093	1.1288	1.0235	0.9913	0.9210	0.9622	1.0102	0.9887	0.7347	1.1442	0.7578	1.0840	0.9886	0.8234	1.0151	0.8179	0.9479	0.9263	0.9885	0.9157	0.8011	1.2217	1.1244	1.0258	0.9676	1.0793	0.5618	0.6991	0.9203	0.8506	0.9273	0.9706	0.7611	0.8205	1.0463	1.0147	1.0028	1.0504	1.1586	1.0531	1.1399	1.1111	1.5293
1834	1.1150	0.9733	0.9362	0.6036	0.9904	0.8210	0.7560	0.8116	0.8738	0.8355	0.9793	0.8217	0.9353	0.8209	0.8438	0.9219	0.9720	0.9764	1.0099	0.9218	0.9255	0.9110	0.8045	1.0909	0.8742	0.9956	0.9765	0.9102	0.9691	0.8815	0.7973	0.8897	0.7608	0.8950	0.9544	0.7890	0.9336	0.9756	0.8673	0.6806	0.8447	0.9505	1.1799	0.9557	0.9532	0.9016	0.8927	1.1909	0.8702
1835	0.8669	0.7115	0.8635	0.9722	0.7927	0.7126	0.7728	1.0156	0.8805	0.9006	0.9500	0.9096	0.8953	0.9385	1.0275	0.8863	1.0641	0.9382	1.0722	0.9940	1.0502	1.1294	0.8934	0.9781	1.0333	0.9772	1.0035	0.8878	0.8581	1.1563	1.0426	1.1200	1.3382	1.2584	1.1022	1.5176	0.9473	1.0111	1.1525	1.2991	0.6958	1.0107	1.4811	0.9248	0.9559	0.8432	1.0873	1.0478	1.1872
1836	0.8407	0.9104	1.0256	0.7212	1.0190	0.9378	1.3362	1.2011	0.8597	0.8952	1.0343	0.8535	0.8668	0.9121	0.9943	0.9009	0.7501	0.8628	0.8756	1.0262	0.6248	1.2471	0.8485	1.0888	0.9879	0.9994	1.0811	0.9641	0.8925	1.0529	1.2177	1.1564	1.0669	1.1783	1.2897	1.1150	0.9746	1.1503	1.0510	1.1374	0.8238	0.9489	0.9928	1.4276	1.7079	0.8119	1.2104	0.8370	1.3469
1837	0.8290	1.0906	1.0126	1.3180	0.9552	1.1731	1.0257	0.7526	0.9209	0.9868	1.0500	0.9436	0.8902	1.0218	0.9827	1.2256	1.3343	1.0263	1.1192	1.0449	1.2769	1.0700	0.9118	0.9652	0.9269	0.9214	1.0782	1.1566	1.1103	1.0121	0.8438	1.1199	0.7633	0.7874	1.0516	0.9077	1.1169	1.0655	1.0243	0.6750	1.0221	0.9539	0.7156	0.7831	0.9586	0.9995	0.8412	0.8847	0.7937
1838	1.3901	1.2681	1.0089	1.6864	1.2813	1.4677	1.2232	1.2578	1.1689	1.2472	1.0644	1.0911	1.0730	1.1534	1.1317	1.1612	1.5584	1.2981	1.2739	1.0180	1.1964	1.0283	1.1358	1.0154	1.0555	1.1266	1.1785	1.2151	1.1490	0.9735	0.8674	1.1384	0.9728	0.7917	1.1211	0.6551	1.1763	1.0066	0.8771	1.0244	1.1174	1.0023	0.8835	1.2934	1.2453	1.4691	1.0750	1.3170	1.4256
1839	1.0799	1.1635	0.9533	0.6225	1.1583	0.9758	1.0985	0.9189	1.0919	1.0957	0.9988	1.0467	1.1132	1.0712	0.8790	0.9491	0.9685	1.1749	1.0826	0.9147	1.2027	1.0881	1.1235	1.0961	1.1686	1.1091	1.0787	1.0174	0.9877	1.0014	1.0365	0.5812	0.8425	1.1017	0.4816	1.1860	0.9520	1.0046	0.9037	1.0301	0.7260	0.9295	0.8034	0.8813	0.8464	1.0691	0.8498	0.8795	0.6746
1840	0.9848	1.0475	0.9453	1.0442	0.6825	0.7025	0.9159	0.9021	1.1300	1.0960	0.9930	1.0940	1.0990	1.1129	0.9084	1.0683	1.1576	0.9729	0.8699	0.9541	1.2498	0.8978	1.0404	1.0172	0.9816	0.9497	0.9404	0.8924	0.9856	1.0297	0.9707	0.9556	0.9218	0.9495	0.9841	0.9805	0.9708	1.0578	1.0817	0.9652	0.7873	0.9106	0.8899	0.8983	0.8229	0.9760	0.7310	0.7817	0.8117
1841	0.5159	0.4785	0.7013	0.6245	0.7553	0.7227	0.6526	0.4676	0.6658	0.6898	0.7286	0.6740	0.6986	0.7770	0.8125	0.6357	0.7310	0.8732	0.7426	0.7336	0.4142	0.5983	0.6230	1.0357	0.8947	0.9850	0.5578	1.1456	0.8976	0.8504	0.7916	0.7927	0.5607	0.8832	0.7900	0.5021	0.9909	0.9031	1.0161	0.4217	0.5730	0.7203	0.7409	0.6380	0.8636	0.5906	0.5622	0.3380	0.5142
1842	1.3106	1.3594	1.1473	1.3609	1.0193	1.0999	1.1288	1.1680	0.9664	0.9409	1.1836	0.9471	0.9176	1.0184	0.9889	0.9689	1.0618	0.8229	1.0680	1.1160	1.0657	0.9026	0.9990	0.8466	0.7896	0.8487	1.0281	0.8721	0.7360	1.0378	0.9733	0.9393	1.1653	1.0726	0.9671	1.0311	0.8273	0.9102	0.8063	1.1419	1.2520	1.1146	1.1288	1.0578	1.0284	1.3433	1.1229	1.3327	1.4224
1843	0.5077	0.4814	0.9475	0.6856	0.9216	0.8369	0.7301	0.5663	0.8854	0.8933	0.8688	0.8732	0.7510	0.9237	0.9943	0.8556	0.6017	0.8149	0.7874	1.0101	0.5944	0.7637	0.8297	0.8495	0.7416	0.8433	0.9860	0.9784	1.0215	0.9836	0.7366	0.8584	0.5787	0.9458	0.9776	0.4032	0.9699	0.9197	0.9335	0.6073	0.5344	0.8247	0.7313	0.6830	1.0091	0.4476	0.9496	0.6748	0.5569
1844	0.6035	0.6955	1.0019	0.7007	0.6180	0.6270	0.7105	0.8199	0.8544	0.8159	0.9248	0.8489	0.7853	0.9268	0.8390	0.7156	0.6997	1.1318	0.8751	1.0143	0.8965	0.9796	0.8804	0.7178	0.7779	0.7250	0.8034	0.9236	0.8690	0.6462	0.9555	0.8220	0.8970	0.8967	0.8086	1.1032	0.9646	0.7405	0.8329	0.9882	0.6613	0.7253	0.7330	0.7768	0.8992	0.7307	0.6412	0.7617	0.5421
1845	0.8182	0.7715	1.0463	1.1877	0.8724	0.9040	0.9597	1.1425	0.9092	0.9294	1.0683	0.9113	0.8175	0.9659	1.3751	1.0774	0.6915	0.9331	0.8712	1.1040	0.8168	1.0145	0.8991	1.3974	1.5706	1.2199	1.2055	1.3202	1.2812	1.2313	1.1912	1.1300	0.9224	0.9637	1.2109	0.7812	1.0916	1.2560	1.1875	0.9219	0.8323	0.8853	1.2369	1.1716	1.1157	0.8009	1.1911	0.9167	0.8735
1846	0.7263	0.8724	0.9333	0.9227	0.8259	0.8028	0.8793	0.7929	1.1198	1.1220	0.9366	1.0920	1.1254	1.1131	0.8624	0.8901	0.9724	1.2410	0.9331	0.9408	1.0541	1.0908	1.1398	0.7953	0.7722	0.7728	0.9093	0.7706	0.8961	0.7658	0.8782	0.9128	0.8847	1.0236	0.8856	0.6030	0.8429	0.8707	0.8543	0.6447	0.7667	1.1060	1.3064	1.0768	1.2255	1.0245	1.0318	0.9157	0.8234
1847	1.4180	1.4641	1.0855	0.9488	1.0522	1.0432	1.0165	1.1779	0.9055	0.9135	1.0819	0.8538	0.8914	0.9653	1.0056	0.8431	0.9419	0.8576	0.9600	1.0332	0.9060	0.9073	1.0038	0.9131	0.7883	0.9365	0.8074	0.7950	0.8196	0.8787	0.9015	0.9601	1.0529	0.8611	1.0006	1.2639	0.9226	0.9680	0.6851	0.9823	1.2881	1.0845	0.9026	1.1535	1.1166	1.2942	1.1170	1.0836	1.2452
1848	1.0975	1.2875	0.9821	0.8850	1.1670	1.0677	1.2163	1.1521	1.3182	1.2059	0.9841	1.1710	1.2284	1.1990	1.0760	1.0318	1.0169	1.1834	1.0502	0.9530	1.0089	0.9959	1.2910	1.0644	1.0633	1.0430	0.9365	0.9583	0.9247	0.9189	1.1744	0.9327	0.8521	1.0201	0.9492	0.8612	0.9800	0.8744	0.9071	1.0477	1.1350	0.9637	1.1836	1.2454	1.1836	1.1903	1.0305	1.2214	1.0923
1849	0.9746	1.1654	1.0086	0.7854	1.0279	0.9861	0.7423	0.8925	0.8655	0.8847	1.0562	0.9328	0.8754	0.9208	0.8762	0.9628	1.3741	1.2269	1.1196	1.0393	0.9418	0.8071	0.8240	0.9100	0.8550	0.8698	1.0276	0.7622	0.9205	0.9064	0.9555	0.9622	0.9979	0.8680	0.9876	0.9222	1.0659	0.9402	0.9071	0.8771	1.1565	0.9296	0.7671	0.7928	0.7954	1.1788	0.7813	0.9803	0.9397
1850	1.2003	1.0437	0.8953	1.3220	1.3286	1.2390	0.9647	1.0260	1.0437	1.0066	1.0021	1.0278	1.0534	1.0576	0.9456	0.9776	1.2936	1.0997	1.1297	0.9974	1.0262	1.0008	0.9703	0.9813	0.9358	1.0130	0.9365	0.9299	0.9296	0.9183	0.9004	0.9535	1.1555	0.9156	1.0125	1.1905	0.9119	0.8441	0.8565	1.0808	1.3813	1.0358	1.0420	1.0311	0.8963	1.1500	0.9451	0.9508	1.4347
1851	0.7013	0.7339	0.9200	0.6007	0.9345	0.8366	0.9629	0.6673	0.8723	0.8608	0.8370	0.8785	0.8603	0.9055	0.8632	0.7977	0.7193	0.8482	0.9388	0.9020	1.0281	1.2596	0.7962	0.8925	0.8762	0.8333	0.8476	0.9665	0.8240	0.9744	1.2533	1.1074	0.9690	1.1302	1.2055	1.2874	0.8425	0.9115	1.1950	1.3027	0.7779	1.1687	1.1545	1.1261	1.2637	0.6988	0.8492	1.0404	0.9353
1852	1.3102	1.2838	1.0825	1.4810	1.1261	1.0908	0.9620	1.1336	1.1991	1.1500	1.0933	1.1656	1.1844	1.2646	1.3188	1.0951	1.3551	1.1861	1.0523	1.0735	1.0487	0.9492	1.2574	1.1667	1.2233	1.1562	1.0915	1.1067	0.9933	1.0139	1.0520	1.0400	0.8496	1.1420	1.1043	1.0170	1.0034	1.2499	1.2469	0.9518	1.5896	0.8502	0.7690	1.1061	0.9103	1.1521	0.9790	1.0290	0.9607
1853	1.2991	1.1657	1.0793	1.5439	1.1281	1.3632	1.5090	1.2431	1.1257	1.1906	1.0561	1.1672	1.1121	1.1078	1.0592	1.0722	0.9020	1.1297	0.9924	1.0862	1.1189	1.2157	1.1097	1.0626	0.9707	0.9204	1.0504	0.9779	1.0124	1.1220	1.1104	0.9804	1.4271	1.2564	1.0399	1.4006	1.0261	1.0469	0.9606	1.2770	1.3052	0.9281	0.9865	1.3574	0.8927	1.1938	1.1220	1.1953	1.3980
1854	0.9601	0.9092	0.9588	0.9810	0.9055	0.8908	1.0873	1.0633	0.8725	0.9311	0.9614	0.9593	0.9882	1.0070	0.8364	1.0279	1.0168	1.0025	1.0198	0.9093	0.9899	0.9432	1.1284	0.9964	1.0351	1.1002	0.9892	0.9049	1.0114	0.8488	0.9634	0.9402	1.0076	0.9918	1.0666	1.1245	0.9424	0.9528	1.0183	0.9640	0.9368	1.1770	0.9486	1.0586	1.1529	0.9290	1.2711	1.0305	1.3779
1855	0.8578	1.0140	1.0745	1.3604	0.8580	0.8640	1.1869	0.9161	1.0192	1.0955	1.0081	1.0931	1.0308	1.0562	1.0013	1.2335	0.6895	0.9931	0.8939	0.9745	1.0831	0.9948	0.9499	0.9242	0.9790	1.0005	1.1636	1.0658	1.1194	1.1666	1.1912	1.2564	1.0059	0.9545	1.1771	1.0024	1.0514	1.1329	1.2217	0.8746	1.3590	1.0474	0.8974	1.0897	0.9729	1.0325	0.8414	0.7470	0.7831
1856	0.5037	0.5955	0.9734	0.5667	0.8499	0.8255	0.6841	0.6265	0.6175	0.6398	0.8491	0.6906	0.7297	0.7013	0.7504	0.5632	0.9004	0.9222	0.9093	1.0000	0.7802	0.7092	0.6570	0.7794	0.6627	0.7228	0.8540	0.7941	0.7473	0.8757	0.8402	0.8346	0.9425	0.9734	0.7920	1.0838	0.8718	0.7818	0.8482	0.7990	0.5908	0.8172	0.9452	0.8948	1.1180	0.5812	0.9378	0.7386	0.6409
1857	0.8347	0.9076	1.0036	0.7677	0.9191	1.0208	0.9333	0.9411	0.7774	0.8690	1.0319	0.8956	0.7521	0.9110	1.1647	1.0650	0.7473	0.4112	0.9475	1.0363	0.6528	0.6211	0.8321	1.1027	0.9900	1.1550	1.1290	1.0560	1.0098	1.0699	0.9487	0.9632	1.1290	0.9840	1.0889	1.2532	1.0848	1.0990	1.0232	1.2025	0.8143	0.9644	0.7949	0.8072	0.8625	0.7239	0.7814	0.9584	1.0512
1858	0.7578	0.6317	0.7876	0.6561	0.8950	0.8284	0.7801	0.6399	1.1080	1.0553	0.8028	1.0006	1.0672	1.0097	0.8427	0.9217	0.7121	1.2467	1.0290	0.8812	0.9692	1.0289	1.1619	0.9538	0.8476	0.9182	0.8053	0.8687	0.8651	0.8867	0.8532	0.9202	0.7185	0.8375	0.8535	0.5801	0.8751	0.8585	0.8675	0.8093	0.6379	0.9090	1.1346	0.9289	0.9370	0.6798	1.0162	0.9226	0.6672
1859	0.7931	0.7805	0.9606	0.7021	0.9388	0.9624	0.9387	0.9390	1.2597	1.1942	1.0289	1.2020	1.1819	1.1385	0.9363	0.7830	0.9851	1.0141	0.8092	0.9732	0.8904	1.0338	1.2883	0.7936	0.8374	0.9143	0.9111	0.7121	0.7730	0.8133	0.7407	0.8293	1.0141	1.0091	0.7923	0.9058	0.8148	0.6968	0.7360	0.8267	1.0414	0.8618	0.8434	0.9424	0.9161	0.9883	1.1138	0.8030	0.9597
1860	1.0119	0.9624	1.0592	0.6846	1.0700	0.8256	1.1213	1.3653	0.9769	1.0047	1.0900	1.0012	1.0173	0.9813	1.0403	1.0047	1.5040	1.1180	1.0369	1.0293	1.0128	1.0839	1.0852	1.0656	0.9654	1.0306	1.1636	0.9107	0.8908	1.1741	1.4331	1.1188	1.0263	1.0158	1.2648	1.1126	1.0873	1.2135	1.3929	0.9530	1.3630	1.0539	1.3289	1.1261	1.1787	1.3593	1.5068	1.2654	0.8110
1861	0.9753	1.0314	1.0276	1.1773	0.9100	1.1198	0.9500	1.2075	0.9851	1.0698	1.0293	1.0061	0.9840	1.0051	1.0001	1.1685	1.0748	0.9693	1.0620	1.0009	1.1347	0.9311	1.0492	1.0433	1.0035	1.0399	1.1915	1.1493	1.2525	1.1737	1.0711	1.2956	1.1668	1.0306	1.3085	1.2817	1.1598	1.1993	1.1409	1.1504	1.1777	0.9503	0.9820	0.9031	0.8848	0.9664	1.1038	0.9890	1.1139
1862	1.4639	1.2129	0.9509	1.4909	1.5547	1.5126	1.3904	1.3076	1.1798	1.1354	1.0215	1.1638	1.1065	1.1156	1.0180	0.8324	1.0363	1.1980	1.0990	0.9406	1.1240	1.0990	1.0363	0.8184	0.8591	1.0343	0.7901	0.7359	0.7367	0.8524	0.9749	0.8142	1.3770	1.0165	0.8238	1.0374	0.8391	0.8070	0.7853	1.2472	1.4489	0.9919	1.1140	1.2047	1.1195	1.3627	1.2135	1.3398	1.5890
1863	0.8021	0.7035	0.9995	0.6994	0.9616	1.1912	0.8281	0.8700	0.8381	0.9298	1.0751	0.8462	0.8708	0.8795	1.0569	1.0154	0.6811	0.8657	0.9160	1.0521	0.7938	0.9264	0.7654	1.1972	1.1909	1.0431	1.0203	1.0653	1.0443	1.0187	0.7591	1.0401	0.8263	1.2257	0.9560	0.3649	1.0086	0.9558	0.9088	1.1932	0.6867	0.9419	0.9896	1.0713	0.8614	0.8251	1.3194	0.8147	0.8538
1864	0.4446	0.5577	0.7859	0.5057	0.7267	0.4954	0.5389	0.3162	0.7643	0.7629	0.8030	0.7269	0.6798	0.7660	1.1472	0.9731	0.5237	0.8246	0.8895	0.9464	0.6145	0.6519	0.9655	1.1830	1.0734	1.1187	0.7542	0.9893	0.9175	0.7114	0.9794	0.8013	0.7079	0.8760	0.8492	0.9882	0.9508	0.9194	1.1383	0.5530	0.4570	0.6432	0.5295	0.4181	0.6707	0.4251	0.3022	0.6079	0.3590
1865	0.9832	1.0229	1.0306	1.1608	0.9479	1.0917	1.0297	0.9989	1.0510	1.0242	1.0305	0.9629	0.9165	1.0136	0.9232	0.9164	1.3146	0.9598	0.9916	0.9501	1.1612	1.0726	0.9446	0.8652	0.5527	0.8934	0.9399	0.8803	0.9224	0.9802	0.8086	0.9513	1.0763	0.9189	0.8303	0.8487	1.0150	0.7845	0.6224	1.0522	1.1176	1.0836	0.8260	0.9495	0.8013	0.9829	1.2455	1.2361	1.4352
1866	0.9888	0.8373	1.1668	1.3250	1.2813	1.2515	1.3880	1.4439	1.2957	1.2749	1.0705	1.1167	1.3184	1.1753	1.1082	1.1305	1.1864	1.2267	0.9966	1.0718	1.1518	1.3575	1.3428	1.0633	0.9121	1.0493	1.0856	0.9193	0.9898	1.2468	1.2367	1.2607	1.5291	1.2826	1.1827	1.2975	1.0463	1.1706	1.3083	1.4501	1.0076	1.2324	1.2169	1.2794	1.0946	0.9823	1.5962	1.0843	1.3062
1867	1.5293	1.5253	1.1655	1.3580	1.2730	1.4628	0.9644	0.9291	1.4481	1.4685	1.0547	1.2578	1.2503	1.3401	1.0185	1.0456	1.1593	1.1383	1.0812	1.1109	1.0293	0.8399	1.2265	0.9308	0.9600	1.0180	0.9588	1.0042	1.0463	1.0344	0.7008	0.8809	1.2037	1.0665	0.9723	0.9872	1.0112	0.9540	0.7551	1.2079	1.3284	1.0044	0.8796	0.8740	0.7917	1.3321	0.7125	1.1319	1.2593
1868	1.8082	1.5412	0.9770	1.8595	1.1947	1.7948	1.3782	1.5226	1.2067	1.1867	1.1174	1.1666	1.3381	1.0424	0.8978	1.1432	1.4403	1.3592	1.2459	1.0328	1.4155	1.4687	1.0586	0.8905	1.0908	0.9252	1.2076	1.1299	1.0780	1.2104	1.2800	1.0989	1.2086	1.0604	1.1807	1.0527	1.0688	1.1861	1.1459	1.2429	1.8157	1.2293	1.2083	1.2110	1.0935	1.6568	1.4458	0.8087	1.7679
1869	1.0979	1.1078	1.0299	0.8031	1.1080	0.8706	0.9556	1.1833	0.9159	1.0240	1.0559	0.9856	0.9805	0.9601	0.9149	1.0274	1.0710	1.0573	0.9792	0.9991	1.1588	0.7403	1.0100	0.7245	0.9541	0.6992	1.0878	1.2463	0.9515	0.9798	1.1217	1.1107	0.6232	0.6875	0.9152	0.8069	0.9925	0.9914	0.9611	0.8044	0.6751	0.9546	0.8740	1.0793	0.8177	1.0370	1.1170	0.6660	1.1069
1870	0.6421	0.7729	1.0157	0.5845	1.1818	1.0256	0.9026	0.8709	1.0345	0.9563	0.9260	0.9775	1.0249	1.0534	1.0692	0.9056	1.0617	1.1200	0.7639	0.9934	0.8709	0.8838	1.2255	1.1583	0.9680	0.9343	0.8814	0.9701	0.9138	0.9949	0.6908	0.8863	0.9029	1.0271	0.8543	0.7933	0.9415	0.9289	0.9603	0.9248	0.5667	0.9732	0.8170	0.8774	0.9019	0.6505	1.0187	0.7975	0.5923
1871	0.7467	0.6860	1.0097	0.7756	0.7688	0.8041	0.8647	0.6722	1.0279	1.0753	0.9438	1.1060	1.1176	1.0617	0.7995	0.8494	0.7360	0.9065	0.9372	0.9668	0.7808	1.1678	1.0775	0.8214	0.7444	0.7342	0.8307	0.9379	0.8467	0.7610	0.7446	0.7170	0.7903	0.8004	0.9461	0.8239	0.9219	0.7206	0.9676	0.6240	0.8335	0.9317	1.0539	0.9030	1.0182	0.7947	0.8645	0.8387	0.6628
1872	1.1247	0.9703	1.0742	1.0511	0.9196	0.7846	0.8209	0.8287	1.3194	1.1250	1.0578	1.1155	1.1409	1.0835	0.8575	1.0934	0.5729	0.9920	0.9380	1.0863	1.0207	0.6574	1.1356	0.9931	1.0629	1.0725	1.0020	0.8836	0.8876	1.1365	0.9885	0.9540	1.1130	1.0419	1.0087	0.8655	0.9423	1.1158	0.8659	1.1051	1.1357	0.9415	0.9100	1.0072	0.8553	0.9871	1.1840	1.0604	1.5343
1873	0.9714	0.9392	1.0590	1.1281	0.9417	1.0102	0.9860	1.0519	0.8977	0.9363	1.0781	0.9950	0.8388	0.9401	0.9789	1.1750	0.9015	0.9417	1.0325	0.9969	0.9948	0.8264	0.9009	0.9235	0.9058	1.0187	1.1164	0.9404	1.1032	1.0138	1.1136	1.0118	1.0323	1.2961	1.0739	1.0254	1.0801	1.1200	1.0013	0.8708	0.9733	0.8590	0.7046	0.9210	0.9644	0.9159	1.0807	1.1382	1.0421
1874	1.0018	0.9652	1.0122	1.1796	1.1389	1.2184	1.1370	1.1376	1.1826	1.1811	0.9457	1.0346	1.1196	0.9613	0.9683	0.9372	1.0358	1.3086	1.0232	0.9760	0.9716	1.1298	1.0978	0.8248	1.0150	0.9353	0.8614	0.7550	0.9168	0.9714	1.0501	0.9296	1.1258	0.7977	1.0235	0.8947	0.8824	0.7889	0.8110	0.9442	1.0483	1.0999	0.8013	0.9612	1.0458	1.0339	1.1087	1.2116	1.1682
1875	0.9191	1.0335	1.0631	1.0655	0.8681	0.9158	0.8317	0.8297	0.7783	0.9644	1.1097	0.8753	0.8055	0.7873	1.0168	1.2504	1.0086	0.8589	0.8729	1.0525	0.9293	1.1331	0.7759	1.1433	1.3105	1.3033	1.0738	1.1491	1.2686	1.1323	1.0900	1.2627	0.8987	0.9282	1.1875	1.3291	1.0740	1.1067	1.1143	0.8621	0.9200	0.9794	0.7179	0.8111	0.7934	0.8119	0.7656	0.9608	0.8462
1876	1.3495	1.2974	1.0557	1.0845	1.2764	1.0874	1.0584	1.0792	1.2945	1.2161	1.0464	1.1757	1.1553	1.0351	0.9917	0.9335	1.0219	1.0512	1.0895	0.9762	1.1494	1.2506	1.2274	0.7722	0.9602	0.8966	1.0054	0.9079	0.7926	0.9916	0.8780	0.8814	1.2567	1.1405	0.8350	0.9063	0.9399	0.8897	0.7864	1.1526	1.4121	1.0983	1.2234	0.9905	1.0443	1.1911	1.2056	1.1252	1.2792
1877	0.4010	0.5201	0.8078	0.4185	0.4776	0.6343	0.5454	0.5074	0.6682	0.7000	0.8645	0.7260	0.7039	0.7347	0.9698	0.9963	0.5702	0.7533	0.7275	0.8261	0.5426	0.8770	0.6834	1.1997	1.3246	1.2463	1.1033	1.2287	1.2049	1.0384	1.2132	1.1276	1.6598	1.0623	1.0499	1.3289	1.1195	1.0072	1.3144	1.2570	0.3056	0.8950	0.9337	0.6465	1.1944	0.4557	0.5959	0.3811	0.4677
1878	1.5216	1.2596	1.0642	1.6321	1.1990	1.3381	1.4207	1.3076	0.9291	0.9506	1.1458	0.9530	0.8690	0.9319	1.1300	1.1054	1.4604	0.9449	1.1220	1.1271	1.3865	1.2759	0.9137	1.0110	1.1384	1.1106	1.1298	0.9518	1.1500	1.1513	1.0093	1.0977	1.0316	0.9786	0.9796	1.2547	1.0029	0.9721	0.7933	1.1222	1.4294	1.2381	1.5270	1.2670	1.3824	1.4479	1.2697	1.8723	1.6748
1879	0.5341	0.6091	0.8564	0.4299	0.7876	0.6653	0.7034	0.7756	0.9251	0.9558	0.9185	0.9511	1.0135	0.9565	1.0541	1.2594	0.7659	0.7884	0.9043	1.0129	1.0003	1.2816	0.9091	1.0896	1.0568	1.1749	1.0882	0.9916	1.2842	1.2398	0.9774	1.0634	0.8862	1.0042	1.0054	0.8962	1.0018	1.1632	1.1432	1.0437	0.5385	1.1786	1.2225	1.1452	1.2212	0.8330	0.8656	0.7963	1.0527
1880	1.0879	1.2116	1.0049	1.4414	1.1717	1.2304	0.9979	0.9964	1.0512	1.1150	1.0237	1.0683	1.0188	1.0103	0.9739	0.8109	1.2709	0.8911	1.1001	0.9645	1.0597	0.9749	1.0260	0.9468	0.9845	1.1081	0.6595	0.7854	0.7771	0.8545	0.6735	0.6968	0.7872	0.8537	0.7794	0.6838	0.8882	0.6819	0.6462	0.7956	1.3664	0.9952	0.9688	0.8860	1.0031	1.4284	1.2086	1.3893	1.0716
1881	1.0268	1.2126	1.1872	1.3198	1.3857	1.2313	1.2749	1.0548	1.0469	1.1124	1.1664	1.0343	0.9323	0.9329	1.1515	1.0979	0.9036	0.9100	1.1614	1.1417	0.7970	1.1024	0.9049	1.1713	1.1674	1.2198	1.0865	1.0312	1.1700	1.1765	0.9765	1.2882	1.3130	1.1244	1.1256	1.2012	0.9838	1.0754	1.1690	1.1209	1.2358	1.0197	1.2283	0.8851	0.8455	1.0685	0.6853	1.5626	1.1831
1882	0.9392	0.7903	0.9611	0.5223	0.9419	0.9603	0.8217	0.7430	1.0408	1.0094	0.9437	0.9967	0.9563	0.9840	1.0192	0.9526	0.6575	0.9393	0.9911	0.9405	0.9110	0.8804	1.0410	0.9910	1.0694	1.0461	0.9056	0.9723	0.9910	0.8402	1.0481	0.8110	0.7941	1.0208	0.8864	0.7692	1.0086	0.9719	0.7754	0.8491	0.7606	0.9974	1.0201	1.0699	1.0977	0.9001	1.0868	1.2378	0.6646
1883	0.7756	0.8965	0.9880	0.5727	0.7386	0.7955	0.8201	0.6568	0.8900	0.9724	0.9806	1.0074	0.9225	0.8872	0.9350	0.8696	0.6424	0.8405	0.8251	1.0547	0.8770	0.9568	0.9298	0.8434	0.7701	0.9123	1.0414	0.8357	0.7789	0.9384	1.0813	0.9501	0.9943	1.0497	0.8633	1.0554	0.9423	0.9792	1.0042	0.7123	0.7342	0.9611	0.7301	0.9272	0.8644	0.8014	0.8845	0.7088	0.5945
1884	1.6032	1.7288	1.1059	1.5378	1.1501	1.4403	1.5276	0.9550	1.0855	1.1519	1.1155	1.0840	1.0686	1.0820	1.2991	1.0546	1.8868	1.0518	1.2594	1.1192	1.1506	1.4739	1.0503	1.1105	1.0801	1.1763	1.1100	1.0117	0.9098	1.0458	1.1577	1.0029	1.0844	1.0863	1.1627	1.1084	1.1148	1.1321	1.1716	0.9337	1.3905	1.2801	0.9884	1.0618	1.0270	1.3119	1.4093	1.3414	1.5123
1885	0.8884	0.8285	1.1972	0.9784	0.9598	1.1568	0.9890	0.9669	0.8691	1.0192	1.1472	1.0142	0.8908	0.9145	1.3364	1.2422	1.0425	0.7818	1.0242	1.2648	1.0152	1.2483	0.8977	1.2582	1.4590	1.3168	1.3723	1.4841	1.5016	1.1169	1.3654	1.4790	1.4021	1.1548	1.2474	1.7723	1.3074	1.3713	1.3367	1.1151	0.7637	0.9041	0.8395	0.8808	0.8907	0.8799	0.6048	0.6707	0.8489
1886	1.3762	1.3875	0.9646	0.7734	0.9026	0.8743	0.7009	0.7715	1.1234	1.1195	0.9797	1.0471	1.0252	1.0164	0.9013	0.9399	0.8102	1.0175	1.0728	0.9173	1.2311	0.9310	1.1526	0.8100	0.8991	1.0542	0.8194	0.7015	0.7593	0.8935	0.6614	0.8772	0.8039	1.0137	0.7348	0.9071	0.8404	0.8818	0.6747	0.9885	1.1826	1.2132	1.4036	1.0649	1.0923	1.1554	1.0862	1.1259	1.2144
1887	0.8048	0.8644	1.0395	0.8010	0.9737	0.9045	0.9185	0.9754	0.8358	0.9114	0.9780	0.9135	0.8399	0.8755	0.9288	0.8929	1.0931	0.9618	1.0006	1.0409	1.0527	0.9255	0.9215	0.8307	0.8477	0.9371	1.1322	0.9354	0.9960	1.0383	1.0684	1.1238	0.8429	0.8669	1.0236	0.7777	0.9856	1.1320	0.9545	0.9100	0.7836	0.9129	0.9196	0.9744	0.9242	0.8685	0.9331	1.1467	0.6894
1888	0.9471	0.9828	1.0853	0.9693	1.2747	0.9765	1.1181	0.8651	1.1465	1.1109	1.0598	1.1068	1.0833	1.0508	1.1972	0.9844	1.1037	1.0318	1.0698	1.0372	1.0095	0.8714	1.0546	1.1313	1.0367	1.1470	0.8370	1.2423	0.9626	0.8451	1.0545	0.8891	0.7907	0.8998	0.9760	1.0307	0.9928	1.0199	1.0403	0.9992	1.0184	0.9778	1.0248	0.7847	0.9212	1.0028	0.9452	1.2768	0.9536
1889	1.0807	1.1946	1.0336	0.6892	1.1160	0.5690	0.8497	0.8573	1.1545	1.0794	1.0049	1.1109	0.9925	1.0464	1.0428	0.9114	0.9498	1.0692	0.9110	0.9323	1.0676	0.9336	1.0512	1.0062	1.0039	0.9414	0.9923	0.9028	0.7956	0.8006	0.8482	0.5178	0.8574	0.9830	0.5061	0.8888	0.9665	0.8912	0.7866	0.7182	1.2950	1.1028	1.1274	1.0989	1.2354	1.2556	1.0895	1.1383	0.9162
1890	1.6620	1.3838	0.9700	1.0245	1.0762	1.0885	0.9780	0.9615	0.9987	1.0405	1.0482	1.1136	0.9840	1.0244	1.0921	0.8091	1.2742	1.1151	1.2351	1.0325	1.1327	0.9598	1.0082	0.7777	0.7520	0.8282	0.8490	0.7289	0.7658	0.9190	0.7401	0.7416	1.0718	0.9170	0.8418	0.7936	0.9509	0.8760	0.6986	1.0873	1.2193	1.1272	1.4665	1.1688	1.0845	1.2755	1.1660	1.4458	1.5921
1891	1.0116	1.0395	0.9649	1.2567	1.1324	1.2047	1.1871	1.3809	1.2012	1.2439	1.0548	1.1678	1.1432	1.1220	1.0243	1.1995	1.3414	1.1214	1.1410	1.0034	1.0909	1.2198	1.1516	1.0423	0.8876	0.9663	1.1100	1.0630	1.0723	1.1333	1.2628	1.1152	1.4161	1.1443	1.0243	1.4483	1.0094	1.1153	0.9884	1.3727	1.3804	1.1523	1.1631	1.1106	0.9218	0.9935	1.0570	1.1293	1.1787
1892	0.6487	0.7684	0.9936	1.1194	0.9300	0.9828	0.9257	0.9791	0.9064	0.8693	0.9699	0.9956	0.9421	0.8663	0.7446	1.0975	0.9253	1.0514	1.0233	1.0446	0.8344	0.9073	0.9505	0.8301	0.9184	0.8051	1.0996	0.8308	1.0588	1.0432	0.8335	0.9618	0.8880	0.8422	0.9490	0.8766	1.1124	1.0591	0.9685	1.0407	0.6998	0.8873	1.1157	1.0904	1.2273	0.8254	0.9115	0.6129	0.6534
1893	1.4731	1.2563	1.0501	1.1915	1.0699	1.0154	1.1123	1.0241	1.2443	1.1662	1.0960	1.1019	1.1631	1.0708	1.2943	0.9993	0.8740	0.9367	0.9150	1.0554	1.1464	0.9265	1.1735	0.9750	1.1068	1.1225	0.9327	0.9248	0.9139	1.0836	0.8196	1.0550	1.0567	1.0851	1.0910	0.8205	0.9407	0.9729	0.9115	0.9536	1.4195	1.0276	0.9362	0.8520	0.8419	1.1881	0.7724	0.9803	1.3761
1894	0.7900	0.6269	1.0715	1.3784	1.3018	1.2922	1.3711	1.4194	0.7425	0.8808	1.0812	0.8702	0.7752	0.8344	1.0728	1.1128	0.6616	0.7453	1.0066	1.1647	0.6549	0.8875	0.8202	1.0926	1.1445	1.0806	1.3095	1.1669	1.2135	1.1640	1.2106	1.2361	1.3540	1.2209	1.3337	1.3692	1.1541	1.2392	1.4627	1.3486	0.6366	1.2638	1.3456	1.0906	0.9552	0.7620	1.0591	0.9848	1.1064
1895	1.1593	1.2907	0.9891	1.1891	1.2425	1.2602	1.1338	1.0532	1.1788	1.1608	1.0763	1.1803	1.0755	1.0637	1.1735	1.1635	1.1844	1.1695	0.9788	1.0342	1.1036	1.0388	1.1897	1.0648	1.2936	1.2556	1.0632	1.0378	1.1294	1.0448	0.9318	0.9048	0.6096	1.0390	0.9710	0.5561	1.0334	0.9959	0.8737	0.6020	1.2768	0.9868	0.7842	1.1419	1.0534	1.1475	1.0819	0.9110	1.4107
1896	0.9154	0.9990	1.0560	0.7954	0.7734	0.7157	1.1498	1.1105	1.1593	1.1194	1.0038	1.1110	1.0725	1.0714	1.0246	1.0246	0.6730	0.7854	0.9264	0.9609	0.9520	0.9980	1.2494	1.0239	1.2374	1.0681	1.0812	1.0465	1.3031	1.1042	0.9278	0.9277	0.7265	1.0412	0.9091	0.7728	1.0675	0.9849	0.9519	1.1705	1.0915	1.0699	1.2258	1.1411	1.2910	1.0534	0.7935	0.8517	1.2635
1897	0.9082	1.0651	1.1366	1.0976	1.1425	0.9193	0.7876	0.9012	1.0692	1.1689	0.9931	1.1095	1.0191	1.0817	1.1038	1.1003	1.4245	1.0945	1.1300	1.0007	0.8998	0.8112	0.9872	1.0754	0.9006	1.1180	1.1449	1.3459	1.1560	1.0825	0.7519	1.0662	1.1203	1.0678	1.1823	1.1441	1.0821	1.1621	0.9804	1.2581	0.9845	0.9686	0.8556	0.7372	0.7149	1.1870	0.7797	0.9621	0.8613
1898	0.4402	0.4859	0.9338	0.4941	1.0404	0.8011	0.7963	0.6197	0.9995	0.8222	0.7152	0.8436	0.8277	0.9507	0.9118	0.9163	0.6152	0.8705	0.8260	0.9024	0.7460	0.6613	0.8485	0.9224	0.9056	0.8984	0.9136	0.9238	0.9043	0.8990	1.0347	0.9527	0.7128	0.7807	0.7752	1.1512	1.0261	0.9595	0.9080	0.7457	0.4099	0.6869	0.5756	0.7399	0.9218	0.3219	0.7311	0.7249	0.4781
1899	0.7258	0.7492	0.8988	0.6953	0.8877	0.9044	1.2314	1.0979	0.9151	0.8692	1.0415	0.8896	0.9354	0.9290	0.8170	0.8525	0.7042	0.9194	0.7213	1.0009	0.7693	0.9740	0.9381	0.7332	0.7949	0.7646	0.9108	0.8640	0.6291	0.8856	0.9201	0.8608	0.9860	1.0783	0.8398	1.0447	0.9271	0.9316	0.8810	1.2111	0.9026	1.1312	1.3942	0.9733	1.0841	0.9785	0.9372	0.8340	0.9261
1900	0.8707	0.8348	1.1305	0.6304	1.0027	0.9169	0.9433	1.0482	1.0444	1.0431	1.0965	1.0385	0.9565	1.0201	1.0849	1.1410	0.7968	0.8885	0.8208	1.1313	0.8396	1.1034	1.1855	1.0879	1.2493	1.2062	1.2916	1.0624	1.1384	1.3453	1.2312	1.2768	0.9684	0.9838	1.2155	0.9666	1.1353	1.4070	1.1735	0.9171	0.8807	1.0357	1.4178	1.0638	1.1536	0.6856	1.0322	0.8435	0.7982
1901	1.4616	1.4840	1.0939	1.0055	1.1580	0.9130	0.9651	1.1485	1.2904	1.3062	1.0117	1.2533	1.2407	1.1790	1.3413	1.2230	1.0780	1.1544	1.0687	1.0743	1.0426	1.1256	1.2064	1.1804	1.4200	1.3152	1.2457	1.2845	1.3740	0.9910	0.8994	1.0579	1.0684	1.2518	0.9754	0.8506	1.2338	1.1652	0.8361	1.0242	1.3103	1.0143	1.1878	0.9870	1.0697	1.4484	1.1558	1.2493	1.3181
1902	0.8290	0.7856	0.9432	1.2086	0.7725	0.8643	1.0429	1.0230	0.8742	0.9264	0.9013	0.9624	0.8982	0.9354	0.8490	0.9692	0.6460	0.8171	0.8745	0.9254	0.9529	0.9060	0.9084	0.8037	0.9037	0.9199	0.9709	1.0000	0.9282	1.0017	1.1119	0.9676	1.0828	1.0767	0.9378	1.1102	0.9647	0.9175	0.9126	1.0750	0.9741	1.0015	1.0205	1.1033	1.0512	0.8849	0.9609	0.8929	0.9521
1903	0.9924	0.8942	1.0291	0.6710	1.0737	0.9614	0.9712	0.8501	0.8679	0.8170	1.0613	0.9087	0.8929	0.8951	0.8787	0.8816	0.9639	1.0173	1.0243	1.0804	0.9393	0.9923	0.8611	0.9132	1.0871	0.8708	0.8603	0.7079	0.8976	1.0065	0.7417	0.9348	0.8362	1.1481	1.0932	0.9320	1.0463	0.9308	0.9133	0.9853	1.0347	1.0212	0.9685	0.8435	0.7400	1.2144	0.8250	1.1009	0.9288
1904	0.9098	0.7714	0.9801	0.7623	1.0836	0.6083	1.0260	1.1021	0.9260	0.9300	0.9930	0.9442	0.8536	0.9359	1.2081	1.1459	0.7915	0.8808	0.8283	1.0066	0.7207	0.7409	0.9922	1.1846	1.2115	1.1981	1.1327	0.9604	1.0174	1.0557	1.0237	1.0800	1.2857	1.2161	1.0257	1.0546	0.9934	1.0355	0.8789	1.2453	0.9606	1.0393	1.1081	1.1495	0.9408	0.9153	1.0755	1.0037	1.1811
1905	1.0688	0.9688	0.9293	1.1127	0.9693	1.0952	0.9549	1.0314	0.9760	1.0973	0.9724	1.1749	1.0561	1.0535	1.0509	1.1020	1.5214	1.0871	1.1054	0.9480	1.1821	1.3426	1.1232	0.9625	1.1346	0.9646	1.2677	0.9904	1.0547	1.0214	1.3530	1.0493	1.0402	1.1247	0.9914	1.5561	1.1086	1.0804	1.1030	1.2436	1.0362	1.3563	1.0078	1.2228	1.2000	1.5735	0.9846	0.8795	0.9722
1906	1.1696	1.2487	1.0486	1.5323	1.1632	1.0878	1.1452	1.2303	1.4045	1.2727	1.0597	1.2183	1.3861	1.2500	1.1611	0.9910	1.3539	1.1601	1.1280	1.0028	1.1240	1.1630	1.2574	1.0572	1.1126	1.0562	1.0099	0.9696	0.9633	1.2165	1.0896	0.9926	1.1857	0.8826	1.1639	1.0980	0.9652	1.2133	1.0316	1.1305	1.3068	1.2452	0.9659	1.2195	0.9667	1.3104	1.0204	1.1280	1.3854
1907	1.4591	1.2509	1.0147	1.4630	1.1276	1.1569	1.1735	1.2826	1.0636	1.0638	1.0868	1.1556	1.1208	1.1101	0.9387	1.3739	1.4360	1.1677	1.1348	1.0572	1.2285	0.8480	1.0766	1.1195	1.2359	1.1526	1.4621	1.2046	1.3432	1.3236	1.2032	1.2736	1.0981	0.9773	1.3161	0.9192	1.3170	1.4439	1.2610	1.1536	1.1577	1.0331	1.0481	1.0129	1.0694	1.1194	0.9705	1.3095	1.2602
1908	1.1261	1.1103	0.9327	0.9914	0.8253	0.8660	0.9216	0.7852	0.9944	1.0483	0.9752	0.9434	0.9420	0.8806	0.9298	1.4256	1.2721	0.9270	1.0897	0.9856	1.1135	1.0792	0.9730	0.8741	1.0941	0.9603	1.2301	1.0992	1.3027	1.0982	1.1657	1.2162	0.7578	1.1434	1.1529	1.1973	1.2044	1.1916	1.0834	1.1580	0.9205	1.0651	0.9332	0.8462	1.0909	1.1049	0.8139	0.9652	0.6377
1909	1.2638	0.9731	0.8788	1.1479	0.7567	0.8334	0.9811	0.8790	1.2848	1.3362	1.0002	1.2727	1.2249	1.2080	0.9246	1.1702	0.9453	1.0669	0.9732	0.9335	1.0547	0.8864	1.1924	0.8084	0.7668	0.7749	1.1089	0.8443	0.9221	0.9920	1.0462	1.0181	0.8996	1.0000	1.0058	1.0102	1.0364	0.9001	0.9144	1.1338	1.2189	0.8699	0.8086	0.9867	0.7675	1.0722	1.0081	0.9031	1.1817
1910	1.1022	0.8072	0.9799	1.3056	1.0538	1.0944	1.1866	1.0888	0.7973	0.8979	1.0660	0.9325	0.7937	0.7812	0.9559	0.9720	1.1230	1.3431	1.1727	0.9992	1.0425	0.9205	0.8207	0.8145	0.9375	0.8606	0.9076	0.8745	0.9015	0.9389	0.7541	0.8688	0.8760	1.1286	0.9379	0.9749	0.8771	0.8729	1.0055	0.9079	0.9695	1.0110	1.0176	1.0573	1.0632	1.0547	1.0720	1.1468	0.8275
1911	1.2527	0.8569	0.9683	0.6901	0.9059	0.8816	0.9240	0.9614	1.5277	1.4537	1.0060	1.3353	1.4394	1.3565	1.2470	0.8493	1.2573	1.1287	1.0148	0.9499	1.2068	0.9781	1.5408	1.2091	1.3204	1.0829	0.9605	0.9901	0.8802	1.0242	1.1074	0.8372	0.9995	1.0124	0.9506	1.0584	0.9326	0.9739	0.8080	1.2111	0.7156	0.9913	1.0259	1.0207	1.1034	1.0239	1.2624	0.8303	1.2700
1912	0.7338	0.8060	0.9691	0.7197	0.7934	0.7940	0.7924	0.7141	0.7128	0.7687	0.9439	0.7986	0.7787	0.8157	0.8002	0.9702	1.0492	0.9412	1.0168	0.9717	0.9671	0.8255	0.8630	0.9498	1.0041	0.9396	0.8193	1.0929	1.0190	0.7852	1.1383	0.9800	0.8618	1.1478	0.9946	0.9789	1.0869	0.9016	1.2909	0.8740	0.7833	0.7762	0.8832	0.7570	0.8469	0.8175	0.7594	0.8673	0.4806
1913	0.6172	0.6377	0.9459	0.8254	1.0085	0.8551	0.8809	0.6124	0.7175	0.7922	1.0449	0.8214	0.9334	0.8571	1.1154	1.1081	1.0448	0.9487	1.2020	1.0005	1.0612	0.9216	0.7763	1.2123	1.2694	1.0867	1.1154	1.3849	1.3268	0.9611	1.0984	1.2421	1.0719	0.9814	1.2750	0.6359	1.2378	1.3244	1.3980	0.7490	0.7353	0.8989	1.1357	0.7598	1.2825	0.7189	0.7153	0.9122	0.5364
1914	1.6276	1.2253	0.9199	1.4569	1.1666	1.2877	1.1299	1.1337	1.2241	1.2703	0.9797	1.1663	1.3072	1.1718	1.1682	1.2035	1.7526	1.2712	1.2486	0.9651	1.2242	1.0774	1.1838	1.3213	1.2632	1.1066	1.2351	1.0986	1.2146	1.0141	1.2581	1.2022	1.2773	0.8082	1.0647	1.1867	1.0698	1.0210	1.0888	1.0375	1.4182	1.1200	1.0008	1.0849	0.8604	1.4071	0.9733	1.3296	1.4817
1915	1.1345	1.1353	0.9746	1.0854	0.8780	0.8102	1.3115	1.4623	1.1035	1.0847	0.9817	1.1154	1.1072	1.0163	0.9615	0.8477	1.2069	1.0268	0.9594	0.9492	1.2431	1.0305	1.1532	0.9473	0.9239	0.9152	0.8409	0.9819	0.8879	0.9383	0.9672	1.0977	0.7776	0.9890	1.0123	0.9492	0.8092	0.9397	1.1158	0.8418	1.4137	1.2406	1.3928	1.5515	1.2780	1.2555	1.4450	1.4736	1.4306
1916	1.3772	1.0689	1.0655	1.0696	1.0011	1.2615	1.0833	0.9926	1.1078	1.0270	1.1056	1.0133	0.9699	1.0272	1.0734	1.0659	0.9669	1.2050	1.0085	1.0753	1.2304	0.8516	0.9287	0.8436	0.8639	0.9286	1.0166	0.8127	0.8159	1.1255	1.0823	1.1043	1.0840	1.0839	1.0095	0.9904	0.9892	1.0820	0.9728	1.1647	1.0458	1.0266	0.7281	0.8265	0.8397	0.9280	0.9067	0.9855	1.0362
1917	0.9405	0.9590	0.9591	1.1094	0.7968	0.9081	0.9954	1.1382	1.1110	1.1133	1.0790	1.0449	1.1418	1.0485	0.9563	0.8205	0.9387	0.8640	0.9615	0.9444	1.0654	1.2037	1.1925	0.8883	1.0901	1.0373	0.9034	0.8526	0.8620	0.9053	0.6910	0.7816	0.7202	0.9009	0.8177	0.8567	1.0126	0.9829	0.6046	0.7157	1.2363	0.9051	0.8242	1.0254	1.2086	0.8874	1.0095	0.7885	0.8971
1918	0.7795	0.9297	0.8691	0.8096	0.7160	0.5887	0.7741	0.9160	1.0109	0.9655	0.9867	0.9411	0.9739	1.0717	0.8587	1.0766	1.1448	1.2392	0.9915	0.8825	0.8055	0.6434	1.1070	0.8356	0.9189	0.8516	1.0660	0.8243	0.8877	0.8585	0.8613	0.7637	0.4303	0.6918	0.7017	0.6390	0.9780	0.8601	0.9089	0.4416	1.0063	0.6901	0.5856	0.7542	0.8058	0.7617	0.7564	0.7274	0.5164
1919	0.8475	0.8782	0.9752	0.8515	0.9044	0.9924	0.8907	0.9587	1.0487	1.0857	0.8732	1.0724	1.1395	1.0618	0.9562	1.0542	1.2279	0.9570	1.1761	0.9648	0.9868	1.0036	1.0699	1.0100	0.9709	0.9848	0.9949	1.0491	1.0624	1.0826	0.9035	1.0039	1.0426	1.0101	0.9570	0.9828	1.0353	1.0047	0.8972	0.8765	0.9444	0.9155	0.9314	0.9576	0.8732	0.9070	0.9168	1.1531	1.0355
1920	0.8202	0.9427	0.9392	1.0428	0.9605	0.9017	1.1279	0.8924	0.8813	0.8566	0.9496	0.9125	0.8563	0.9228	0.8979	0.8163	0.7010	1.1871	0.8832	0.9782	1.0395	1.1224	0.9295	0.9256	0.8361	0.8526	0.8815	0.9742	0.8462	0.8748	1.0449	0.9108	0.8951	1.0917	0.7700	1.0453	0.8923	0.9204	1.0282	1.1014	0.8892	0.7191	0.8528	0.9450	0.9132	0.9923	0.8481	0.9738	0.5859
1921	0.9394	0.8117	1.0437	1.0251	0.9443	0.8183	1.1632	1.1279	0.9673	0.9205	0.9755	0.9356	1.0757	1.0143	1.0613	1.1015	0.8090	1.0330	0.9256	1.0401	1.0023	1.1633	1.0154	1.0381	1.1477	0.9966	1.2143	1.1200	1.1654	1.1194	1.4700	1.2008	1.3639	1.2144	1.1049	1.3283	1.0909	1.2353	1.1850	1.2448	0.8194	1.1310	1.0377	1.0880	0.9768	0.9376	1.1244	1.0247	0.8441
1922	0.9872	0.8975	1.0274	1.0120	1.0369	1.0086	0.8705	1.1061	1.1513	1.1912	0.9980	1.0871	1.1698	1.1950	0.8704	0.8717	1.2979	1.2778	1.1030	0.9801	0.9654	0.7887	1.2640	0.8604	0.9223	0.9682	0.8907	0.8604	0.8756	0.9172	0.7134	0.8490	0.9269	0.9291	0.8091	0.7132	0.9726	0.7789	0.8035	0.9823	0.8429	0.9931	0.7408	0.9834	0.8332	0.9562	1.0955	0.8442	1.0934
1923	0.9112	1.1129	0.9761	0.8320	0.9285	1.1050	1.0436	1.5313	0.8583	0.8903	1.0269	0.8655	0.8588	0.8164	0.8840	0.9975	0.5121	0.8674	0.7805	1.0197	0.9703	1.0068	0.8468	1.2230	1.0132	0.9958	1.1625	1.2077	1.0590	1.1237	1.0880	1.1450	1.2738	1.1475	1.0461	1.0644	1.1911	1.1686	1.4021	1.0989	0.9443	1.0078	0.9819	1.1766	1.0625	0.9294	1.1003	0.8803	0.9224
1924	0.5280	0.5950	0.6164	0.4863	0.5763	0.5017	0.4603	0.3855	0.6324	0.7286	0.6226	0.7125	0.8066	0.7361	0.8448	0.6196	0.9041	0.9799	0.8653	0.7215	0.6530	0.6713	0.8149	0.6867	0.7194	0.8105	0.5446	0.9146	0.9949	0.5891	0.6250	0.5635	0.6196	0.7101	0.5907	0.4699	1.1489	0.4688	0.6740	0.4348	0.4922	0.7418	0.6218	0.5683	0.8261	0.5167	0.4741	0.6229	0.4881
1925	0.7949	0.7710	1.0996	0.9751	0.9926	1.0427	1.0298	1.1050	0.8984	0.8339	1.1224	0.8675	0.8381	0.9664	1.2145	1.0525	0.6569	0.9571	0.8599	1.0839	0.9357	1.1036	1.0265	1.2194	1.2955	1.1024	1.2460	1.1175	0.9493	1.0104	1.4587	0.8426	1.3544	1.1477	1.0736	1.3669	0.9969	1.1427	1.1648	1.3724	0.9557	1.1717	1.1695	1.2165	0.9979	0.9886	1.2372	0.9064	1.1198
1926	0.9118	0.9446	0.9263	0.6387	0.8858	0.9542	0.9076	0.7460	1.0204	1.0323	0.9342	0.9529	0.9476	1.0401	1.0345	1.1724	1.0305	1.1996	0.8623	0.9834	1.0807	0.9778	0.9821	1.1199	0.8171	1.0161	1.2701	1.3712	1.2229	1.1083	0.8964	0.8903	0.5755	0.7616	0.8777	0.5873	1.0588	1.1396	1.2732	0.7028	1.0550	1.0237	1.1149	0.9743	1.1298	0.9926	1.3083	1.0274	0.9888
1927	1.0257	1.1075	0.9984	1.0963	0.8597	0.9252	0.7490	0.9402	1.0539	1.0114	0.9691	1.1189	1.1306	1.1264	0.7791	0.9203	1.1282	1.1290	0.9838	0.9730	0.9819	0.8922	0.9469	0.8861	0.8058	0.9398	0.8375	0.7057	0.7909	0.9941	0.8285	0.9338	1.3564	1.0583	0.9196	1.3237	0.9127	0.8618	0.8559	1.1775	0.9296	1.0947	0.7395	0.7579	0.8464	0.9856	1.0323	1.2614	1.0960
1928	0.6800	0.7280	1.0283	0.8171	0.8419	0.8042	0.7912	1.1215	1.0074	0.9007	0.9128	0.9522	1.0109	0.9748	0.8453	1.0660	0.6935	0.9745	0.8411	1.0024	0.9561	1.0112	0.9168	0.9387	0.7303	0.8486	0.9605	0.8399	1.0442	1.0393	0.8928	1.1936	0.8690	1.0160	1.0705	0.9115	0.9623	1.0933	0.9629	0.9521	0.8067	0.9520	0.9747	1.0236	0.8054	0.9438	0.9942	0.7265	0.9173
1929	0.8308	0.7373	0.9762	0.9562	0.9499	0.8573	0.7991	0.7333	0.9252	0.8391	0.9211	0.8345	0.8345	0.8827	0.9795	0.8207	0.7114	0.7593	0.8671	1.0101	0.7847	1.0247	0.8491	0.9261	1.0009	0.8802	0.7285	0.7510	0.7553	0.6663	0.9253	0.7749	0.5614	0.8626	0.7063	0.5635	0.8432	0.7287	0.7439	0.4903	0.7878	0.7592	0.6717	0.8402	0.7735	0.8511	0.8282	0.9684	0.5464
1930	0.6819	0.8032	0.9993	0.8740	0.8349	0.6861	0.8135	0.8302	0.9623	0.9520	0.9283	1.0287	0.9100	0.9708	0.8214	0.9746	0.6678	1.0670	0.9879	0.9832	0.9033	0.9384	0.9235	0.8742	0.7242	0.8343	0.9986	0.8584	0.8871	1.0833	0.8521	0.9488	0.8571	0.8715	0.9509	0.8974	1.0052	1.1648	1.1468	1.0360	0.9019	1.2426	1.0388	0.9868	1.1157	0.7094	0.9881	1.0242	0.8777
1931	0.5728	0.7392	0.8498	0.4835	0.6630	0.6322	0.6969	0.5986	0.9823	1.0383	0.8294	0.9708	0.9810	0.9621	1.1190	0.6529	0.7735	1.0285	1.1192	0.8239	0.9782	1.1234	0.9617	1.4795	1.2197	1.2367	0.8564	1.1473	1.2546	0.9637	0.7905	0.7669	0.5817	0.7032	0.7605	0.4965	1.1872	0.9683	0.9978	0.5152	0.6926	0.6766	0.6817	0.7032	0.8391	0.6701	0.6123	0.5200	0.5530
1932	1.3266	1.3709	0.9192	1.4113	1.2440	1.3243	1.1986	1.3650	1.0646	1.0365	1.0415	1.1213	1.1655	1.0470	0.8790	1.0126	1.3578	1.1118	1.1587	0.9334	0.9994	0.9431	1.1273	0.8956	0.8811	0.9576	0.9416	0.7089	0.7594	0.8679	0.9879	0.8630	1.1536	0.9472	0.9268	1.2159	0.9657	0.8573	0.9056	0.9899	1.5696	1.0046	0.9958	1.0085	1.0473	1.6023	1.1963	1.4648	1.1719
1933	0.6129	0.6843	1.0451	1.3904	0.9367	0.9652	0.9865	1.2094	1.0734	0.9208	1.0398	0.9937	1.0647	0.9634	0.7482	0.8149	0.8973	0.8058	0.9321	1.0089	0.8883	0.7517	1.1691	0.8028	0.7316	0.8478	0.7739	0.7022	0.6480	0.8308	0.8257	0.8113	0.9414	0.7753	0.7923	0.6662	0.7953	0.7213	0.8058	0.6476	0.7943	0.8094	0.7974	0.9521	1.0812	0.6888	0.9023	0.8904	0.7226
1934	0.6868	0.6892	0.9780	0.2329	0.5455	0.4623	0.5265	0.5483	0.7124	0.7238	0.9228	0.8565	0.6776	0.7632	1.0534	0.9655	0.4942	0.7559	0.7139	0.9262	0.7760	0.8816	0.9558	1.2922	1.3974	1.1554	1.1742	1.0140	1.1472	0.9458	1.0341	0.8594	0.4833	0.7752	0.8411	0.4925	1.0783	0.9449	1.2438	0.7126	0.6221	0.9166	0.7456	0.8390	0.7333	0.6853	0.8126	0.5406	0.6496
1935	1.3358	1.2684	0.9714	1.0006	1.3439	1.2005	1.1449	1.2701	1.0061	1.0493	1.0255	1.0427	1.0006	1.0110	1.0900	0.8912	1.0602	1.0511	1.1593	0.9669	1.0745	1.3813	0.9756	1.1343	1.0429	1.0358	0.8950	0.8400	0.7907	0.8441	1.1289	0.9859	0.9369	1.0283	0.9420	1.1293	0.8689	0.8788	0.6942	0.9560	1.0620	1.0203	1.1632	1.3291	1.0604	1.4253	1.5204	1.3016	1.0083
1936	1.2665	1.2204	1.1015	1.2895	1.3344	1.2783	1.3981	1.4836	1.1694	1.0712	1.0795	1.0775	1.1217	1.1489	1.1637	1.0019	0.8056	0.9591	0.9584	1.0979	0.9647	1.1761	1.1753	1.2777	1.3409	1.0612	1.0910	1.0286	1.0990	0.8902	0.8961	0.9030	0.9914	0.8067	0.9337	0.7962	1.1381	0.9385	0.8624	0.8942	1.1826	1.1972	1.4065	1.1096	1.0527	0.9803	1.4483	1.0560	1.4735
1937	1.3488	1.4088	0.9204	1.6281	1.3797	1.5218	1.2367	1.1227	1.1979	1.0987	0.9384	1.2245	1.2282	1.1279	0.8990	0.9118	1.3472	1.2271	1.2315	0.9058	1.1243	1.0750	1.2378	0.9818	0.8074	0.9831	0.7107	0.9922	0.7337	0.8164	0.6493	0.6736	0.9691	0.9310	0.8326	0.8225	0.9495	0.7508	0.8105	0.8953	1.1664	1.0320	1.1464	1.0953	1.0465	1.3590	1.1952	1.2885	1.1376
1938	1.4483	1.2631	1.0056	1.2350	1.1445	1.1424	1.1815	1.4441	1.0888	1.0466	1.0961	1.1430	1.0184	1.0879	1.1232	1.0469	1.2183	1.1934	1.0308	0.9822	1.0562	1.0548	1.1076	1.2645	1.3042	1.1687	0.9029	1.1646	0.9488	1.0142	1.0722	1.0335	1.2017	1.0180	1.0744	1.1300	1.0882	0.9720	1.0862	1.0958	0.7775	1.0759	1.2288	1.1446	1.1117	1.0098	0.9903	1.2445	1.3047
1939	0.7181	0.6963	0.9524	1.5200	1.0223	1.1562	1.0905	0.8320	0.7125	0.7590	1.0746	0.7895	0.8138	0.7595	0.8858	1.0476	0.9918	0.9445	1.3060	0.9887	1.0466	1.0429	0.7087	1.0392	0.8727	0.9007	0.9843	1.1071	1.0576	0.8086	0.9015	1.0002	0.6981	0.6805	0.9695	0.8639	1.0477	0.7906	1.0758	0.6062	0.5787	0.8137	0.5575	0.8635	0.6344	0.9157	0.7043	1.0643	0.5416
1940	1.0955	1.1940	0.9631	1.2659	1.2974	1.2297	0.9444	1.0888	1.1672	1.1628	0.9466	1.2439	1.1462	1.1721	1.0599	1.0226	0.7610	1.0076	0.9669	0.9500	0.9908	1.2173	1.2437	1.0192	0.9711	0.9568	1.0401	0.9291	1.0154	1.0172	1.0718	1.0221	1.2131	1.0223	0.9228	0.9822	1.0678	1.1913	0.8798	1.1676	0.8197	1.1668	1.4423	1.1124	1.0384	1.1277	1.1971	1.1497	1.5448
1941	1.6237	1.4742	0.9958	1.5500	1.1742	1.3716	1.2340	1.8771	1.1291	1.0216	1.0649	0.9674	1.0499	1.0106	1.0343	0.9642	1.8654	1.1154	1.1780	1.0338	1.2142	1.2483	1.0220	1.0079	0.9678	0.8482	0.9886	0.9962	0.8654	1.1012	1.2865	1.2504	1.1297	0.8318	1.1166	1.2444	1.0252	1.1724	1.3063	0.9638	1.4954	1.2089	1.3519	1.3009	1.2769	1.5028	1.5997	1.4737	1.7177
1942	1.1217	1.2211	1.0587	0.8105	0.9491	0.8696	1.1364	1.2799	0.9285	1.0014	1.0125	1.0889	1.0162	0.9368	1.0039	1.0894	1.1105	1.0455	1.1141	1.0982	1.1280	1.0723	0.9778	0.9469	0.8547	0.9909	1.2122	1.0784	0.9872	1.1442	1.3322	1.4611	1.2511	1.1010	1.4015	1.3525	1.1705	1.1996	1.1396	1.3768	1.1551	1.0820	1.4003	1.1812	1.3124	1.0947	1.2685	0.9792	1.3041
1943	0.8648	0.9959	0.9908	1.2736	0.7285	1.0557	0.8696	1.0344	0.7746	0.8089	0.9988	0.9010	0.7210	0.8261	0.9495	1.2299	1.2180	1.1583	1.0196	1.0431	1.0708	0.8376	0.8792	1.1285	1.0000	1.0546	1.1594	1.1494	1.0730	1.2233	1.2294	1.2973	1.2419	1.0728	1.1983	1.3657	1.1352	1.1238	0.9130	1.3548	1.3329	1.1310	0.8303	0.8405	0.9213	0.9249	0.9933	0.8820	0.9259
1944	0.9525	1.0059	0.9546	1.1476	0.9496	1.3702	1.0391	0.9504	0.8486	0.7790	0.9193	0.8465	0.8661	0.8525	0.7945	0.9966	1.3291	0.8307	1.1687	0.9243	1.2119	0.9936	0.8222	0.8372	0.7421	0.8129	0.9286	0.8434	0.8834	0.8677	1.0508	0.7321	1.0522	0.8288	0.8988	1.3650	0.9202	0.8527	0.9317	1.0086	1.1481	1.0103	0.8804	0.8999	0.9660	1.1272	1.0402	0.9276	0.7763
1945	0.9528	0.8982	1.0357	0.9838	0.9375	0.8364	0.9661	1.1282	1.0443	0.9862	1.0197	1.0149	0.9422	1.0119	1.0107	1.1088	1.0281	0.8813	0.9974	1.0155	1.0199	0.9791	1.0824	0.9869	1.0468	1.0231	1.1862	0.9462	0.9928	1.0697	0.9937	1.0419	0.9559	1.0357	1.0582	0.8056	1.1632	1.1298	1.1538	0.9523	0.8806	0.8922	0.9834	1.0017	0.9530	0.9693	1.0098	0.8257	1.0046
1946	0.8492	0.8011	1.0718	0.8897	1.0672	0.9832	1.1896	0.8596	1.0471	1.0227	1.0016	1.0310	1.0276	0.9628	0.9908	1.1160	0.9067	1.0285	0.8410	1.0546	1.0266	1.0555	1.0054	1.1048	0.8109	1.0795	1.0911	1.0236	0.9988	1.0920	0.7142	1.2374	1.0087	0.9845	1.1566	0.6629	1.0902	1.0580	1.1327	1.1132	1.0837	0.8735	0.8170	1.0382	0.8810	0.7968	0.8316	1.0127	0.6570
1947	0.5894	0.6965	1.0132	0.6682	0.7590	0.6970	0.9781	0.8920	0.8325	0.8954	0.8400	0.9965	0.8833	0.8994	0.9457	1.0112	0.7014	0.9893	1.0031	0.9295	0.9530	0.9479	0.8484	1.0564	1.0707	0.9691	1.0749	0.9378	1.0629	0.9776	1.2579	1.1227	0.6205	0.7405	1.1640	0.7397	0.9992	1.0079	1.2604	0.6047	0.9320	0.8695	0.8143	0.9119	1.1151	0.7228	0.8573	0.7068	0.7027
1948	0.7548	0.9396	0.9795	0.6067	0.9454	1.1055	1.2020	0.8926	1.0147	0.9086	0.8939	0.9193	1.0500	1.0057	0.9812	0.6987	0.8796	0.8562	0.8512	0.9440	0.7515	0.8125	0.8794	0.8888	0.8985	0.8848	0.7137	0.9386	0.8614	0.8703	1.0956	0.9078	1.1913	1.1322	0.9523	1.3143	0.8964	0.8186	0.9121	1.1653	0.8502	0.9900	1.2310	1.0394	1.2105	0.6428	0.8887	0.9224	0.6432
1949	1.0423	1.1263	0.9740	0.8375	1.0157	0.9156	0.8232	0.8354	0.8977	0.8132	0.9006	0.7834	0.8041	0.8289	0.8300	0.8784	0.9663	0.9680	1.0728	0.9445	0.8232	0.8510	0.7724	0.9558	0.8335	0.9212	0.9450	0.9698	0.8552	0.7906	0.9699	0.7959	0.9203	0.9476	0.9616	0.8076	1.1206	0.8293	1.0755	0.8743	1.0312	0.9939	0.9752	0.9147	0.8524	1.0266	0.9427	1.0290	0.7616
1950	0.7604	0.7733	1.0473	0.7844	0.9541	0.8975	0.9102	0.9483	1.0577	1.0667	0.9670	1.0498	1.0321	1.0533	1.0921	0.9955	0.6879	0.8560	0.8595	0.9792	0.8461	1.0264	1.1448	1.3468	1.1877	1.2804	0.9790	1.0773	0.9649	1.0317	1.0315	1.1277	1.1008	1.0382	1.2175	0.9028	1.0863	1.0350	0.7002	1.0996	1.0297	0.8870	0.7121	0.9737	0.8173	1.0256	1.0700	0.8522	0.9098
1951	0.7537	0.8246	1.1094	0.6319	1.0579	1.0776	1.0076	1.0902	1.0807	0.9558	1.0056	0.9966	1.0499	1.0461	1.0220	1.1790	0.7657	0.8951	0.9103	1.0396	0.7611	0.7882	0.9737	0.9968	0.9979	1.0539	1.1581	1.0263	0.9814	1.0798	1.1298	1.1579	1.0981	1.0793	1.2792	1.1963	1.0360	1.1209	1.0223	1.2074	0.5627	0.9632	0.9106	1.0601	1.0826	0.7825	1.1554	0.8641	1.4125
1952	1.5980	1.6513	0.9098	1.2619	1.0211	1.1559	1.2510	1.2417	1.0814	1.1249	1.0254	0.7906	1.1288	0.9666	1.0937	1.0351	1.5178	1.0469	1.1483	0.9909	0.9944	1.0575	0.9199	1.1338	1.1384	1.0716	1.0028	1.0980	1.0840	0.9743	1.1508	1.0426	1.2035	0.9475	1.0736	0.9436	1.0992	1.0140	1.0910	1.1504	1.0783	1.1247	1.2585	1.1086	1.0135	1.5004	1.3467	1.3317	1.6562
1953	0.8515	0.8829	0.9359	1.7135	1.0145	1.0344	1.4637	1.2272	0.9390	0.9619	0.9620	1.0567	1.0641	1.0688	0.8311	0.9984	0.8828	0.8924	1.0206	0.9838	0.9321	0.9404	0.9853	0.8054	0.8347	0.7423	1.0542	1.0725	0.9466	1.2598	1.3311	1.3467	1.3031	1.0628	1.1987	1.2474	0.9727	1.0688	0.9079	1.2595	0.7330	1.2437	1.3310	1.1316	1.3212	0.9044	1.3918	0.8139	0.8700
1954	0.9147	1.0661	1.1158	0.5607	0.8600	0.9672	0.8994	0.8552	0.9334	0.8835	1.0317	0.9268	0.8785	0.9741	1.1629	1.1286	0.7252	1.0762	0.8737	1.0947	0.9442	0.9664	0.8871	0.9843	1.0554	1.0534	1.1224	0.9564	1.2474	1.0164	1.1000	1.1084	1.0933	1.0881	1.1883	0.8736	1.1234	0.8660	1.1445	1.3229	1.0225	0.8975	0.7732	0.9179	0.8872	0.8942	0.7680	0.9603	0.7089
1955	0.9729	0.8457	0.9967	0.6527	0.9615	0.8021	1.0671	1.1290	0.7998	0.8340	0.9160	0.9141	0.8593	0.8764	0.8394	0.9180	0.9033	0.8528	0.8848	0.9307	0.9576	1.0209	0.9393	0.7328	0.8202	0.7048	0.8175	0.7462	0.9301	0.7564	0.6976	0.9179	0.3820	0.6644	0.8182	0.6695	0.9781	0.9601	0.7475	0.4260	0.9939	0.8081	0.8874	1.0111	1.1275	0.9614	0.9759	1.0513	0.7759
1956	1.2481	1.2795	0.9574	1.1434	1.0202	1.0505	1.0791	1.0832	0.9490	1.0213	1.0659	1.0109	0.9283	0.9765	0.9763	0.9515	0.7790	0.7874	0.9500	1.0586	1.0454	1.0337	1.0204	0.9524	1.0597	0.9950	1.1042	0.8535	0.9077	1.0597	1.1154	1.0361	1.5961	1.1312	1.1287	1.1259	0.9909	1.1029	0.9290	1.3562	1.1069	1.1052	1.1056	0.9926	1.0133	1.0195	1.2780	0.9584	1.3912
1957	0.8161	1.1114	0.9436	0.6528	0.9609	0.9478	1.0696	0.8867	1.0812	1.0334	1.0084	1.0003	1.0807	0.9961	1.0678	1.0364	0.8182	1.0260	0.9387	0.9558	1.0614	1.0683	1.0178	1.0834	1.0700	1.0559	1.1342	1.0577	0.9730	1.1473	1.1875	1.1628	1.1157	1.0862	1.1620	1.0392	1.0365	1.0627	1.2239	1.3338	0.9419	1.0433	1.0628	1.1107	1.2772	0.8467	1.4206	1.0163	0.8441
1958	1.7708	1.4695	1.0994	1.2012	1.0248	0.9001	1.0702	1.1236	1.3122	1.1933	1.0690	1.1288	1.2128	1.1675	1.1927	1.1152	1.3203	1.2230	1.1290	1.0950	1.1971	1.1018	1.2605	1.2042	1.0621	1.1283	1.1507	1.3203	1.1569	1.1613	1.3295	1.1307	0.8467	1.0746	1.2464	1.2724	1.1183	1.0015	1.2922	1.4569	1.2096	1.0859	1.0535	1.0119	0.9880	1.2663	0.9602	1.1869	1.3668
1959	0.8447	1.0316	0.8058	0.6205	0.7621	0.7463	0.7328	0.9228	0.7346	0.7924	0.7506	0.8827	0.8030	0.8875	0.7236	0.8297	0.6679	0.8604	0.7634	0.7446	0.9527	0.8051	0.7582	0.9119	0.8694	0.8872	0.8413	0.8979	0.9801	0.9784	0.9109	0.7984	0.5678	0.6946	0.7036	0.6230	0.9966	0.9241	0.8297	0.4509	0.9278	0.9892	0.7935	0.8257	0.8125	0.8390	0.7234	0.9471	0.5995
1960	0.6435	0.6332	0.9929	1.3439	0.9433	1.0743	0.8270	0.8330	0.7329	0.8139	0.8504	0.8357	0.9083	0.8595	0.7109	0.8565	0.6207	0.8643	1.0124	0.9566	0.8585	0.8247	0.7491	0.8560	0.9443	0.8080	0.9297	0.8264	0.8632	0.8526	0.7292	0.8126	1.1037	1.0221	0.9820	0.7966	0.7860	0.8099	1.1170	1.0451	0.9801	0.9392	1.0399	1.3495	1.0952	0.8492	0.8916	0.7609	0.8660
1961	0.6081	0.6414	0.7541	0.4076	0.6781	0.4676	0.5670	0.6052	0.8133	0.8590	0.8093	0.8784	0.8519	0.8475	0.9474	0.7892	0.6606	0.6186	0.7740	0.8365	0.7334	0.8985	0.8997	0.9640	1.0416	0.9088	0.8811	0.9549	0.9056	1.0582	0.8415	0.9250	0.9378	0.9194	0.8690	0.9980	0.9122	0.8024	1.0758	1.0680	0.5809	0.9659	0.8923	0.6756	0.9885	0.5803	0.8186	0.4222	0.6937
1962	1.2957	1.4377	1.0524	1.3699	1.2608	1.1634	0.9430	1.0587	1.2018	1.1454	1.0707	1.1266	1.0109	1.0784	1.0547	1.1060	1.2151	1.0873	1.1684	1.0442	1.0929	0.9461	1.2180	1.1920	1.2023	1.1962	1.2239	1.1666	1.0316	1.0759	1.0185	1.0217	0.8965	1.2168	1.0071	1.0010	1.0904	1.0505	1.1316	1.1679	1.4786	0.8717	1.0240	0.8952	0.9378	1.3302	0.8830	0.9688	1.1402
1963	0.9970	1.1283	1.1142	0.9496	1.3046	1.1987	1.3391	1.1460	1.1415	1.1364	1.1730	1.0960	1.0677	1.0649	1.0017	1.1520	0.8385	0.9840	0.8981	1.1297	1.0251	0.9390	1.0591	1.2077	1.3230	1.1065	1.2184	1.1624	1.0747	1.2577	1.0078	1.1334	1.3126	1.1391	1.2322	1.1482	1.1344	1.1944	1.1165	1.3708	1.2421	0.9657	1.3224	1.3325	0.9504	0.8208	1.2139	1.0175	1.5762
1964	0.6285	0.6604	1.0473	0.6361	0.8873	0.9360	0.7420	0.5904	0.8985	0.8882	0.9627	0.8650	0.9445	0.9263	0.8734	0.8668	0.9361	1.0864	0.9186	1.0577	0.8727	1.2020	0.9451	0.8790	0.8827	0.9239	0.9575	1.0596	1.0753	1.0093	1.1361	0.9429	0.7536	0.8727	0.9101	1.2682	1.0716	1.0429	1.1790	0.8935	0.4511	0.8534	0.4328	0.8455	0.6638	0.5939	0.9073	0.9054	0.6340
1965	1.2403	1.2895	1.0204	1.2160	1.2264	1.2705	1.0591	1.0049	0.9295	0.9064	1.0335	0.8748	0.8442	0.9773	1.0607	1.0407	0.9602	0.9255	0.9269	1.0600	1.0618	0.9804	0.9792	0.8841	0.9136	0.9411	1.3527	1.0660	1.0635	1.1841	1.1366	1.2442	1.5020	1.3188	1.1616	1.5031	1.0159	1.1321	1.1674	1.3884	1.1982	1.0748	1.2555	0.9966	1.0658	1.2089	0.9741	1.1270	1.1087
1966	0.9802	1.1728	1.0206	0.8957	0.9532	0.7872	0.9092	0.9479	0.7949	0.9263	0.9249	0.9348	0.9111	0.9347	0.9783	1.0768	0.9522	1.1163	1.1687	0.9605	0.9618	0.7716	0.8073	0.9317	0.8224	0.8386	1.1163	1.2105	1.2080	0.8961	0.6334	1.2466	1.2208	0.9186	0.8776	0.7207	1.1006	0.9794	0.9807	0.8493	1.0379	0.9765	0.8597	0.9814	0.8579	0.9933	0.8748	0.9528	0.6996
1967	1.3886	1.3799	1.1075	1.2958	1.1775	1.2886	1.1042	0.9017	1.4071	1.1815	1.0460	1.1446	1.3611	1.2657	1.1245	0.8582	0.7073	1.0381	0.9259	1.0934	1.1583	0.9793	1.2970	0.9760	1.0515	1.1578	0.7797	0.8494	0.7267	0.9726	1.0292	0.7814	1.0552	1.1431	0.7388	1.2257	0.8708	1.0572	0.6477	1.1378	1.4652	1.0074	0.9040	0.9518	0.8487	1.0653	0.9924	0.9872	1.2428
1968	0.5662	0.5790	1.1346	0.7886	0.9453	0.9067	0.8090	0.7853	1.1756	0.9884	0.9894	0.9811	1.1499	1.0804	0.8140	0.9429	0.6589	0.9165	0.8422	1.0799	0.7795	0.9127	1.0562	1.0352	1.0358	0.9653	0.9412	1.2358	1.0594	1.0717	0.8752	0.8613	0.5196	0.5225	0.7703	0.5636	0.9241	1.0410	1.0904	0.3496	0.8846	1.0749	0.8828	0.8674	0.9972	0.7338	0.9685	0.6766	0.6788
1969	1.6836	1.5180	1.0604	1.2079	1.4451	1.6099	1.1778	1.1326	1.4521	1.4246	1.1045	1.2830	1.4106	1.2887	1.2999	1.1946	1.2286	1.3321	1.1881	1.0837	1.1687	0.9194	1.4665	1.3444	1.2232	1.2658	1.1277	1.1560	1.1385	1.1658	0.9137	1.2178	1.3809	1.2657	1.3593	1.2503	1.0719	1.0931	1.1051	1.2007	1.4399	1.0509	1.1324	1.0545	1.3309	1.2484	1.2245	1.2909	1.3850
1970	0.8069	0.8939	0.9736	0.9852	0.8792	0.8186	1.0755	1.1730	0.7733	0.9425	0.9665	0.9036	1.0278	0.9726	0.8620	0.9153	0.8166	0.9496	0.8932	1.0699	1.0188	0.9748	1.0360	1.0414	0.9859	0.9357	0.9110	1.1188	0.9139	1.0715	1.0332	0.9841	1.2086	1.2229	1.0776	1.2736	0.9176	0.8767	0.7351	1.1735	0.6015	0.9262	0.9700	1.0949	0.7870	0.6731	1.0133	0.7897	1.0193
1971	0.7136	0.9545	1.0837	0.9393	1.0567	1.0080	0.9776	0.9243	0.7815	0.8086	0.9821	0.9054	0.8632	0.8147	0.8935	1.0073	0.8564	0.9100	0.9738	1.0121	1.0359	1.0398	0.8256	0.8760	1.0096	0.9836	1.0227	0.8785	1.0341	1.0918	1.2420	1.0718	0.8888	1.1106	1.1086	1.4345	1.0026	1.0632	1.1053	1.0878	0.8556	1.0504	0.9980	0.9026	0.9402	0.8883	1.3267	0.7304	0.9532
1972	0.6961	0.6385	0.9691	0.6320	0.6196	0.6031	0.6620	0.7035	0.6953	0.7837	0.8718	0.8664	0.7620	0.7966	1.0673	1.1179	0.8033	0.9635	0.9628	0.8085	0.8265	0.7802	0.7715	0.8891	0.8854	0.8170	1.0642	1.0141	1.0620	1.1004	0.6904	1.1884	0.8388	0.9481	1.1587	0.9911	1.1371	1.0187	1.1251	0.8615	0.6869	0.7272	0.5817	0.7856	0.9748	0.6172	0.7363	0.6624	0.5174
1973	1.4301	1.3760	0.9800	1.3111	1.4664	1.3804	1.0529	1.1154	1.3620	1.2718	1.0462	1.2310	1.1910	1.1953	0.9095	0.9790	1.2708	1.0958	1.1676	0.9813	1.0315	0.8772	1.1975	0.8814	0.9075	0.9494	0.8610	1.0027	0.8728	0.7651	0.8428	0.7612	0.6941	0.8923	0.7754	0.6650	0.9374	0.7359	0.7004	0.7159	1.0942	1.0361	1.2693	0.9739	0.9843	1.3415	1.0277	1.2590	1.2468
1974	1.2262	1.0807	1.0219	1.2210	1.1859	1.2337	1.1228	1.3559	1.0340	1.0633	1.1332	1.0766	0.9648	1.0414	1.0415	1.0290	0.8177	0.9146	1.1848	1.1196	1.0242	1.0745	1.0349	1.1416	1.1905	1.1846	1.0790	1.1687	1.1025	1.1110	0.8745	0.9198	1.2910	1.0731	0.8934	1.0261	1.0459	1.0371	0.9406	1.0671	1.1987	1.2485	1.2082	1.1922	1.0038	1.1602	0.9020	1.1690	1.1344
1975	0.9387	0.9403	1.0392	0.6840	0.8350	0.8150	0.7700	0.8794	1.0395	1.0342	1.0071	0.9889	1.0175	0.9977	1.1299	0.9756	0.8535	1.0066	0.8495	1.0617	1.1211	1.3162	1.0200	1.0531	1.0212	1.0274	0.9026	0.8435	0.8853	1.0742	0.7462	0.9631	0.7783	0.8592	0.9549	0.9597	0.9714	0.9256	0.8505	0.7923	0.9243	1.0624	0.6997	0.9451	0.7799	0.9593	1.0005	0.8516	0.7940
1976	0.5175	0.5714	1.0263	0.6109	0.7146	0.6724	0.7076	0.8425	0.6940	0.8011	0.7374	0.7700	0.8078	0.8400	0.9032	0.7985	0.6519	1.0524	0.8932	0.9201	0.9114	0.9806	0.8389	0.8392	0.8497	0.8175	0.6523	1.1147	1.1285	0.7576	1.0009	0.9534	0.7600	0.7246	1.0055	0.7129	1.0092	0.7082	1.0250	0.5387	0.5828	0.6218	0.5372	0.6131	0.8177	0.8580	0.5092	0.5856	0.4287
1977	0.6517	0.7237	0.7278	0.5619	0.4938	0.5332	0.5898	0.4096	1.0100	1.1060	0.7571	1.0189	1.1495	1.1075	1.1392	0.9766	0.7952	0.8981	0.9852	0.7395	1.2509	1.5139	1.1608	1.2399	1.3245	1.2726	0.7010	1.0592	1.1945	0.6945	1.2769	0.9371	1.0220	1.0993	0.6492	0.9975	1.0769	0.8454	1.2371	1.0957	0.7277	0.7962	0.5765	0.5901	0.8363	0.8197	0.5551	0.6305	0.5286
1978	1.8686	1.6926	1.0996	1.5976	1.4814	1.1184	1.3639	1.2455	1.3107	1.3148	1.2217	1.2658	1.2431	1.2775	1.4060	1.0872	1.5002	1.1977	1.2386	1.1191	1.1139	1.0785	1.3260	1.2493	1.0499	1.1357	1.2480	1.1359	1.0328	1.3462	1.1723	1.1640	1.5323	1.1962	1.4413	1.3905	0.8636	1.1271	0.9585	1.2493	1.7966	1.4558	1.4563	1.3163	1.1594	1.3456	1.4563	1.4937	1.5841
1979	0.9922	1.0786	0.9727	1.2907	1.1579	1.2464	1.1242	1.4174	0.8126	0.9011	1.0759	0.9292	0.7499	0.8723	0.9691	1.2131	1.0519	1.1312	1.0933	1.0048	1.2084	1.0656	0.8142	0.8109	0.7091	0.7793	0.9761	1.0767	1.1652	0.9444	0.7813	0.9527	0.9038	1.0053	0.9562	0.9927	1.1534	0.8708	0.8373	0.7622	1.1220	1.0925	1.3895	1.2736	1.0803	1.2532	1.3715	1.2778	0.9811
1980	1.0623	1.3355	1.1147	1.1395	1.0825	1.2247	0.9748	0.9731	1.2898	1.1395	1.0757	1.2082	1.1669	1.2150	1.1796	1.1796	1.2503	1.1201	1.1131	1.0858	1.2179	0.9230	1.4989	1.0317	1.1466	1.0623	1.0464	1.0489	0.9917	1.0872	1.2824	1.1817	1.1988	1.2078	1.0872	1.2388	1.0907	1.0579	1.0773	1.1143	1.0055	1.2176	0.9243	1.0148	1.0828	1.3011	0.9302	1.3653	1.3608
1981	0.7863	0.8468	1.0428	1.0289	0.8002	0.7390	0.8646	0.9271	0.9338	0.9335	1.0123	0.8857	0.9322	0.9479	0.8849	1.1002	0.9871	0.8668	0.8152	0.9848	0.9286	0.9679	0.8055	0.8414	1.0263	1.0454	0.9762	0.9939	1.2087	1.0335	0.9829	1.1699	1.0636	1.0495	1.0079	1.3194	1.0733	0.8912	1.0648	0.9381	1.0155	0.9615	1.0337	0.9594	1.0119	0.9960	1.0349	0.8258	0.7068
1982	1.3420	1.1836	1.0467	1.2325	1.1837	1.4154	1.0746	0.9799	1.0303	1.0955	1.0847	1.0822	0.9150	1.1182	1.1687	1.0315	1.0498	0.9721	1.0485	1.0876	1.0753	1.0710	1.2623	1.1539	1.2910	1.1943	1.0744	1.2675	1.0001	1.2741	0.9162	1.2216	1.2093	1.1973	1.1052	0.9503	0.9137	1.0525	1.0725	1.2903	1.1407	1.0108	0.9770	0.9264	0.9621	1.0468	0.8024	1.5848	1.3765
1983	1.6714	1.4014	1.0393	1.5409	0.7995	0.7202	1.0126	1.3282	1.2536	1.3465	1.0662	1.2601	1.3837	1.0667	1.0257	1.2338	1.3594	1.0720	1.1689	1.0889	1.5506	1.5700	1.1942	0.9938	1.0458	1.1745	1.1027	1.2617	1.3031	1.3419	1.0334	1.1923	1.2857	1.1059	1.1930	1.1929	1.1866	1.2015	1.0066	1.2558	1.4609	1.0804	1.2875	1.2941	1.2650	1.1505	1.2380	1.1186	1.5255
1984	0.8329	0.8089	1.0947	0.8910	0.6704	0.7044	0.7637	0.9172	0.9013	1.0807	1.0830	0.9625	0.8593	0.9283	1.2193	1.2422	0.7809	0.9559	0.9253	1.1211	0.8897	0.9422	0.8836	1.1950	1.1769	1.0790	1.1134	1.0836	1.2198	1.0588	1.1614	1.2227	1.2599	1.2597	1.2041	1.2820	1.1588	1.0792	1.0512	1.3179	0.7688	1.0864	1.1482	1.0097	1.0010	0.7934	0.9292	0.6434	0.9890
1985	0.6470	0.7119	1.1242	0.8025	1.0660	1.0607	1.1348	0.9427	1.0676	0.9748	0.9141	1.0654	1.0783	1.0826	0.9301	0.8856	1.1585	0.9335	0.9893	1.0298	0.9367	1.0375	1.1168	0.7775	0.7643	0.7568	0.9081	0.5907	0.7770	0.7884	0.7120	0.8682	1.1909	1.0976	0.8650	0.8987	0.9321	0.9294	0.9922	0.9430	0.9136	0.9437	0.5851	0.9121	0.7410	1.0300	0.7370	0.9806	0.7719
1986	1.1682	1.0530	1.0865	1.4656	0.9729	1.2432	1.1208	1.2313	1.3629	1.3116	1.1388	1.2837	1.2072	1.2607	1.2450	1.2588	1.0867	1.0945	1.0962	1.0822	1.2052	1.2508	1.2042	1.0530	1.0914	1.2181	1.2027	1.1425	1.3199	1.3144	1.0392	1.2719	1.1691	1.0843	1.1677	1.2464	0.9991	1.1552	1.3138	1.2242	1.3760	1.1727	0.9136	1.2137	1.0257	1.1129	0.7793	1.2077	1.3853
1987	0.7624	0.8308	0.7328	0.7763	0.8827	0.7904	0.7299	0.8103	0.7118	0.7425	0.9158	0.7467	0.7755	0.7987	0.9704	0.7635	0.6260	0.9737	0.8341	0.8289	0.6367	0.7934	0.7536	0.9991	1.2559	1.1014	0.7482	0.9876	1.1057	0.7001	0.7249	0.6745	0.6980	0.7325	0.8554	1.0245	0.8410	0.5846	0.8090	0.6389	0.6538	0.7715	0.6116	0.8289	0.7410	0.6467	0.7618	0.7857	0.6352
1988	0.6158	0.7431	0.9837	0.5846	1.0091	0.9975	0.8522	0.6436	0.9217	0.9635	0.9090	0.9944	0.8720	0.9750	0.8431	0.8587	1.4197	1.0535	1.1912	0.9359	1.2985	1.2480	1.1278	0.8535	0.8649	0.9066	0.8058	1.0030	0.9412	0.5443	1.1129	0.9285	0.9630	1.1741	0.9637	1.1108	0.8533	0.6564	0.9730	1.1608	0.7476	1.0496	0.7554	0.8468	0.9864	1.0556	0.8745	0.8131	0.6871
1989	0.7581	0.7269	1.0446	0.9895	1.2198	1.1617	0.9373	0.9353	0.8540	0.8238	0.9485	0.7814	0.7836	0.8709	0.9510	0.8557	0.7180	0.9985	0.9701	1.0363	0.7762	0.7998	0.7710	0.7321	0.7950	0.8124	1.0819	0.8187	0.6290	0.8194	0.8189	0.8715	1.0693	0.9773	0.9969	0.7849	0.9147	0.9298	0.8493	0.9161	0.8466	0.8954	1.1105	0.8703	1.1167	0.8487	1.0080	0.9232	0.7129
1990	0.7100	0.7534	0.9561	0.5743	0.8502	0.8380	0.7669	0.5254	1.0460	1.0304	0.7968	1.1022	1.1839	1.0915	1.2221	0.7206	0.7202	0.9804	0.7917	0.9038	0.5845	0.7960	1.0998	1.3618	1.3805	1.3858	1.1048	1.2474	1.3278	1.0349	1.2975	1.0020	0.7455	0.7743	0.9092	0.7163	1.1633	1.0477	1.2685	0.8125	0.6536	0.8800	0.8648	1.0152	1.2264	0.5985	1.1878	0.8248	0.7581
1991	1.0097	1.1126	0.9698	0.9136	1.1088	1.0452	0.9784	1.1270	1.0601	0.9665	1.0137	0.9896	0.9754	1.0254	0.8304	0.9748	1.0911	0.9727	1.2176	0.9409	1.1059	0.8811	0.8940	0.8854	0.7646	0.9355	0.9129	1.0283	0.7666	0.8583	1.0385	0.7377	1.1662	1.0746	0.7079	1.1470	0.8997	0.9023	0.6306	1.0230	1.2741	1.0399	0.8914	0.9196	0.9651	1.1536	1.0778	1.3772	0.9703
1992	1.0211	1.1761	0.9769	0.7668	1.0399	0.8694	1.0222	1.1999	0.7861	0.8126	0.9470	0.7588	0.7586	0.8607	0.9144	0.9872	1.4279	1.2038	1.3447	0.9729	1.2932	1.1140	0.8575	0.9992	0.9896	1.1034	0.8776	0.9892	1.0194	0.7717	0.5777	0.5580	0.4905	0.7966	0.6713	0.4051	0.9998	0.7953	0.8018	0.6477	1.1966	0.8149	1.0715	0.9124	0.7549	1.2519	0.8064	1.2435	0.9265
1993	1.7685	1.5447	0.9623	1.2282	1.3484	1.3990	1.2514	1.1585	1.1858	1.3104	1.1339	1.2705	1.2957	1.2114	1.1707	1.1320	1.5051	1.1546	1.4112	0.9474	1.2743	1.0689	1.2694	1.0565	1.2435	1.0097	1.0481	1.0028	1.0293	1.0991	1.2161	1.2089	1.1720	1.0949	1.1124	1.2901	0.9459	1.0494	0.7229	1.3806	1.6300	1.2424	1.5334	1.2015	1.1937	1.3883	1.4393	1.3471	1.8525
1994	0.6766	0.7903	0.9590	1.4097	1.0973	1.1245	1.1728	1.0220	0.8675	0.8273	1.0517	0.8996	0.8918	0.8009	0.9351	0.8117	0.8764	0.8166	0.8993	1.0156	1.0174	1.0116	0.9145	0.7845	1.0175	0.8980	0.8124	0.7055	0.9631	0.9028	1.2644	0.9550	0.9281	0.9381	0.7235	1.0188	0.8618	0.9175	0.9302	0.9381	0.8262	0.9568	0.9093	1.0716	1.1893	0.9636	0.8264	0.9847	0.7047
1995	1.3488	1.3219	0.9974	1.4135	1.1550	1.3605	1.3705	1.1127	1.1151	1.0686	1.0412	1.1418	1.0583	1.1287	1.1574	1.0399	1.7976	1.0531	1.2091	1.0420	1.3843	1.2754	1.1891	1.0349	1.1241	1.0251	1.1108	0.9036	0.9395	1.0261	1.3036	0.9286	1.2210	1.1037	0.9629	1.3542	1.0055	1.1145	1.0495	1.1437	1.6511	1.1045	1.2325	1.4249	1.2977	1.3918	1.4338	1.3060	1.4459
1996	1.1338	1.1067	0.9468	1.2490	0.7164	0.8273	0.9261	1.1734	1.0581	1.1646	1.0794	1.0769	0.9626	1.0603	0.9141	1.3230	0.7673	1.0128	0.7593	1.0295	0.7465	0.9071	1.0406	1.0140	1.1509	1.1664	1.2149	1.1773	1.2947	1.3028	1.0484	1.3342	1.0931	0.9949	1.2614	1.0521	1.1546	1.2432	1.3025	1.1986	1.0410	1.1772	1.1647	0.8942	1.0263	0.8461	1.2812	0.9660	1.3132
1997	1.0027	1.0484	1.1091	1.1252	0.8168	0.9020	0.8108	0.8136	0.8954	0.9775	1.2028	1.0100	0.9476	0.9924	0.8169	0.9934	0.6979	0.8343	0.8083	1.0821	1.0103	0.8068	0.9989	0.9564	0.8794	0.9434	0.9342	0.9126	0.9505	1.2385	0.8767	1.1610	1.0637	1.1102	1.0980	1.0811	0.9475	1.1256	1.0684	1.0720	0.8456	1.0315	0.8908	0.9090	0.8978	0.8877	0.6702	0.8590	0.9708
1998	1.7155	1.4549	0.9990	1.5817	1.5379	1.9250	1.7572	1.5223	1.3666	1.1457	1.0665	1.2696	1.3116	1.1803	1.1184	0.9732	1.8080	1.0392	1.3983	0.9738	1.3740	1.1122	1.3036	1.0134	0.8645	0.9744	0.9139	0.7604	0.8565	1.0729	1.4347	1.1222	1.3940	1.1556	1.1374	1.3423	0.8589	1.1055	1.1089	1.2959	1.4986	1.3672	1.6777	1.3177	1.3044	1.5299	1.5910	1.6317	1.6611
1999	0.8130	0.8224	0.9164	0.8220	0.8677	0.6790	0.8768	0.9925	0.7830	0.8515	1.1728	0.8794	0.9464	0.9326	0.9481	1.0287	1.3150	0.8563	0.9013	1.0277	1.0971	1.0654	0.8505	0.9321	0.9181	0.8705	1.0874	1.3154	1.1045	1.1379	0.5887	1.0251	0.8427	0.8736	1.0150	0.6981	1.0054	1.3076	0.9847	0.9725	0.8529	1.0346	1.0356	0.9085	0.8164	1.1975	0.9684	1.1303	0.9840
2000	1.0917	1.0703	0.8974	0.9624	1.0571	1.0121	1.1108	1.1305	0.8760	0.9578	0.9939	0.9734	0.9318	1.0003	1.1089	1.0397	1.0582	1.1099	0.8974	1.0156	0.9189	0.7922	0.8942	0.9231	1.2408	1.1097	1.1180	1.0445	1.2696	1.2043	0.8869	1.1401	0.8205	0.9286	1.1542	0.9019	1.0674	1.1949	1.0816	0.8705	1.1403	0.9590	1.1190	1.0901	1.0247	1.0048	0.5938	0.9460	1.0540
2001	1.0355	0.9745	0.9731	0.5955	0.7764	0.6940	0.9300	1.2013	0.9862	0.9968	0.9881	0.9688	1.0463	0.9094	0.8136	0.9428	1.1047	0.9945	1.0614	0.9711	0.9734	0.8998	1.0207	0.7949	0.6317	0.8295	0.8639	0.8801	0.8966	0.5088	0.8277	0.4811	0.5994	0.8269	0.6478	0.8614	0.8717	0.5396	1.0375	0.7461	1.0584	0.7256	0.7978	0.9910	0.9300	0.9913	1.0887	0.9147	0.7192
2002	0.6179	0.6979	1.0315	0.8151	1.0614	1.1534	0.9827	0.9510	0.9755	0.8644	1.0291	0.9586	0.9618	0.9422	0.8873	0.7240	0.4745	0.3698	0.7709	1.1306	0.6512	0.7856	0.8782	1.0641	0.7632	0.8534	0.8100	1.0019	0.7309	0.8746	0.9542	0.8678	0.9611	0.9050	0.8821	0.8715	0.8843	0.9805	1.0480	0.7189	0.5886	0.9648	0.9064	0.8313	0.9411	0.6577	0.9122	0.7870	0.9217
2003	1.0224	0.9252	1.0025	0.9441	1.0597	1.0854	1.1408	0.8307	0.8411	0.9645	1.1118	0.9571	0.7457	0.7913	0.9756	0.9548	1.1414	1.2497	0.9620	1.1016	1.2320	1.2571	0.9779	0.8145	0.8250	1.0085	1.1312	0.9262	0.8332	1.1762	0.8718	1.1272	0.9551	0.9010	1.0945	0.9022	1.0269	1.2558	0.9628	0.8902	1.1128	0.9943	1.4041	1.0898	1.2482	1.2845	1.1551	0.9401	1.4058
2004	0.7296	0.7286	1.0221	NaN	NaN	NaN	1.0221	0.8377	0.6731	0.7374	0.8042	0.7553	0.6705	0.8186	0.9972	1.0453	0.8505	1.0746	0.9659	1.0278	0.7758	0.8228	0.8105	0.9512	0.9917	1.0248	0.9791	0.9300	1.0409	1.1178	1.1076	0.9789	1.0748	1.1924	1.1350	1.1861	0.9573	1.0837	0.9231	1.0514	0.7374	1.0695	1.1151	0.8328	0.8294	NaN	NaN	0.8856	0.8236
2005	1.3675	1.3788	1.1485	NaN	NaN	NaN	NaN	NaN	1.4417	1.4375	1.1237	1.3760	1.2892	1.2747	1.2791	1.2342	1.3996	1.0512	1.2349	1.1334	1.1935	1.1365	1.4907	1.1842	0.8604	0.9671	1.2944	0.8415	1.0767	0.9736	1.3834	1.0686	1.2411	1.1976	1.1689	1.3125	1.0416	1.0683	1.0416	1.1646	NaN	NaN	NaN	1.3299	1.4678	NaN	NaN	NaN	1.2159
2006	1.2150	1.2870	1.0965	NaN	NaN	NaN	NaN	NaN	1.1572	1.2549	1.2595	1.2697	1.2921	1.2941	1.3371	1.2748	1.0822	1.2340	0.9849	0.9941	1.2218	1.0495	1.1743	1.2161	1.0138	0.9538	0.9654	1.0488	1.1149	1.1157	0.8122	0.9967	1.2091	1.1479	0.9653	0.7994	1.0642	1.1220	1.0187	1.1122	NaN	NaN	NaN	NaN	NaN	NaN	NaN	NaN	1.1438
2007	0.4836	0.4754	0.8994	NaN	NaN	NaN	NaN	NaN	0.6643	0.6630	0.9188	0.6841	0.6356	0.7449	0.7552	0.4900	0.8556	0.5900	0.8919	0.9118	0.5489	0.5933	0.4762	0.8310	0.8359	0.9178	0.6105	0.9157	1.0160	0.9370	0.8241	0.9176	0.5578	0.8800	0.8429	0.7213	0.9958	0.8411	1.2261	0.7619	NaN	NaN	NaN	NaN	NaN	NaN	NaN	NaN	0.4865
2008	0.8252	0.9774	1.0348	NaN	NaN	NaN	NaN	NaN	0.9023	0.9698	1.0472	1.0239	0.9417	1.0212	0.9611	1.2018	0.7525	1.2893	1.0652	0.9283	1.2047	1.0627	0.9528	0.9613	0.9124	1.1059	0.9651	0.8954	0.8679	0.8453	1.0400	1.0408	0.8674	1.0248	0.9738	0.8028	0.8892	0.9931	0.9926	0.8176	NaN	NaN	NaN	NaN	NaN	NaN	NaN	NaN	0.7121
2009	0.9317	0.7523	0.9071	NaN	NaN	NaN	NaN	NaN	0.8922	0.9952	0.8525	0.9824	0.9267	0.9667	0.9789	0.9652	0.7668	0.9143	0.8103	0.9405	0.9107	0.9796	1.0236	0.9750	1.1163	1.0536	1.1229	0.9197	0.9981	0.9678	1.0236	0.8228	1.0973	1.0269	1.0016	1.0137	0.9381	1.1106	1.2204	0.9383	NaN	NaN	NaN	NaN	NaN	NaN	NaN	NaN	0.8325
2010	1.2531	1.1150	1.0188	NaN	NaN	NaN	NaN	NaN	1.0459	1.1152	1.0897	1.1945	1.2134	1.0670	0.9968	1.1562	1.1897	1.1709	1.0965	1.0862	1.1625	1.2212	1.1810	1.0260	0.9789	1.0022	1.1042	0.9854	0.9732	1.0189	1.1294	0.9864	0.9350	1.0115	1.1158	1.0856	0.9650	1.3157	1.0511	0.9117	NaN	NaN	NaN	NaN	NaN	NaN	NaN	NaN	1.3519
2011	1.3131	1.2051	1.0118	NaN	NaN	NaN	NaN	NaN	1.0566	1.1079	0.9391	1.1138	1.0670	1.0195	1.0333	1.4581	1.4568	1.1975	1.1670	1.0722	1.2357	1.3313	1.1469	1.3814	1.2799	1.2140	1.2542	1.5264	0.9105	NaN	NaN	NaN	NaN	NaN	NaN	NaN	1.2054	NaN	NaN	NaN	NaN	NaN	NaN	NaN	NaN	NaN	NaN	NaN	1.2695
2012	0.6854	0.6776	1.1614	NaN	NaN	NaN	NaN	NaN	0.7304	0.8566	NaN	0.8682	0.8678	0.8524	NaN	0.7405	0.5713	1.0461	0.8709	1.0948	0.7668	0.9379	0.7016	NaN	NaN	NaN	NaN	NaN	NaN	NaN	NaN	NaN	NaN	NaN	NaN	NaN	NaN	NaN	NaN	NaN	NaN	NaN	NaN	NaN	NaN	NaN	NaN	NaN	0.5790
2013	0.7055	0.7696	NaN	NaN	NaN	NaN	NaN	NaN	0.7336	0.8645	NaN	0.7958	0.8705	0.9095	NaN	0.7502	0.8728	0.9198	0.8436	NaN	0.7382	0.7318	0.7998	NaN	NaN	NaN	NaN	NaN	NaN	NaN	NaN	NaN	NaN	NaN	NaN	NaN	NaN	NaN	NaN	NaN	NaN	NaN	NaN	NaN	NaN	NaN	NaN	NaN	NaN
2014	0.6454	0.6757	NaN	NaN	NaN	NaN	NaN	NaN	0.8836	1.0369	NaN	0.9732	0.9330	0.9631	NaN	0.8693	0.5907	1.0859	0.8262	NaN	0.8185	0.7997	0.9330	NaN	NaN	NaN	NaN	NaN	NaN	NaN	NaN	NaN	NaN	NaN	NaN	NaN	NaN	NaN	NaN	NaN	NaN	NaN	NaN	NaN	NaN	NaN	NaN	NaN	NaN
2015	0.7965	0.8637	NaN	NaN	NaN	NaN	NaN	NaN	0.8460	0.9104	NaN	0.7607	0.8799	0.9261	NaN	1.1420	0.8053	0.9812	0.8650	NaN	0.8252	1.0203	0.9503	NaN	NaN	NaN	NaN	NaN	NaN	NaN	NaN	NaN	NaN	NaN	NaN	NaN	NaN	NaN	NaN	NaN	NaN	NaN	NaN	NaN	NaN	NaN	NaN	NaN	NaN
2016	1.1849	0.9085	NaN	NaN	NaN	NaN	NaN	NaN	NaN	NaN	NaN	NaN	NaN	NaN	NaN	1.1857	0.9276	NaN	1.0972	NaN	NaN	NaN	NaN	NaN	NaN	NaN	NaN	NaN	NaN	NaN	NaN	NaN	NaN	NaN	NaN	NaN	NaN	NaN	NaN	NaN	NaN	NaN	NaN	NaN	NaN	NaN	NaN	NaN	NaN
[truncated: 20 more columns]
